# Supplementary material for: Human longevity: 25 genetic loci associated in 389,166 UK biobank participants
Source: Aging (Albany NY). 2017 Dec 6;9(12):2504–20. doi: 10.18632/aging.101334 (PMC5764389; doi:10.18632/aging.101334)
Supplement: Supplementary file 2 [file aging-09-2504-s002.xlsx]

## Sheet: parents_age_mgale_all_qn.bolt.i
Significant (p<5x10-8) GWAS results for parents attained age (Martingale residuals, rank-transformed) from BOLT-LMM, adjusted for age, sex, array type and assessment centre
	n=389,118		BP=build 38 (hg19)			BETA=effect o ALLELE1 (effect allele)
SNP	CHR	BP	GENPOS	ALLELE1	ALLELE0	A1FREQ	INFO	CHISQ_LINREG	P_LINREG	BETA	SE	CHISQ_BOLT_LMM_INF	P_BOLT_LMM_INF	CHISQ_BOLT_LMM	P_BOLT_LMM
rs660240	1	109817838	0	T	C	0.215532	1	24.4137	7.8e-07	-0.0149179	0.00272163	30.0441	4.2e-08	30.134	4e-08
rs602633	1	109821511	0	T	G	0.217284	1	25.8565	3.7e-07	-0.0150436	0.00270781	30.8649	2.8e-08	30.9358	2.7e-08
rs2760995	6	32574358	0	G	A	0.801875	0.997358	31.1583	2.4e-08	0.0168597	0.00280568	36.1096	1.9e-09	35.9479	2e-09
rs4713555	6	32575524	0	G	T	0.732857	0.997833	31.1212	2.4e-08	0.0138583	0.00252778	30.057	4.2e-08	30.0664	4.2e-08
rs28383322	6	32592796	0	C	T	0.782851	0.95691	39.6371	3.1e-10	0.0182341	0.0027717	43.279	4.7e-11	43.0736	5.3e-11
rs28383364	6	32606912	0	A	G	0.801805	0.989412	30.2387	3.8e-08	0.0166302	0.00281804	34.8259	3.6e-09	34.6255	4e-09
rs9456508	6	160598596	0	T	G	0.978225	0.988998	30.4239	3.5e-08	-0.0425855	0.00769252	30.6469	3.1e-08	30.3902	3.5e-08
rs16891156	6	160608804	0	A	C	0.97972	1	32.7178	1.1e-08	-0.0438604	0.00793114	30.5826	3.2e-08	30.2276	3.8e-08
rs10080815	6	160687412	0	T	G	0.980189	1	37.3755	9.7e-10	-0.0497239	0.00802429	38.3988	5.8e-10	37.8307	7.7e-10
rs9295127	6	160751123	0	C	A	0.98022	0.988625	37.6417	8.5e-10	-0.0501518	0.008065	38.6691	5e-10	38.0938	6.7e-10
rs9295128	6	160751531	0	G	T	0.983087	0.962228	45.199	1.8e-11	-0.0594745	0.0088293	45.3743	1.6e-11	44.9918	2e-11
rs9457906	6	160759553	0	C	G	0.980227	0.991012	38.0398	6.9e-10	-0.0502726	0.00805695	38.9334	4.4e-10	38.3669	5.9e-10
rs759659447	6	160775803	0	C	T	0.998227	0.703934	34.9911	3.3e-09	-0.183544	0.0316231	33.6876	6.5e-09	33.4431	7.3e-09
rs1510226	6	160816409	0	T	C	0.980527	0.98939	37.2094	1.1e-09	-0.0498113	0.00812429	37.591	8.7e-10	37.0378	1.2e-09
rs9457925	6	160848743	0	G	A	0.981377	1	44.1479	3e-11	-0.0541318	0.00826909	42.8538	5.9e-11	42.4255	7.3e-11
rs4709431	6	160853746	0	A	C	0.981413	0.99832	44.2902	2.8e-11	-0.0541552	0.00828206	42.7566	6.2e-11	42.3478	7.6e-11
rs182443492	6	160891897	0	C	A	0.989569	0.959874	36.3166	1.7e-09	-0.0637747	0.0111875	32.4958	1.2e-08	32.6474	1.1e-08
rs1510224	6	160894878	0	T	C	0.981542	0.996268	45.7716	1.3e-11	-0.0553182	0.00831542	44.2556	2.9e-11	43.8626	3.5e-11
rs9457927	6	160910282	0	A	G	0.98174	0.993092	45.4993	1.5e-11	-0.0553358	0.00836677	43.7419	3.7e-11	43.3355	4.6e-11
rs147555597	6	160911596	0	G	A	0.99044	0.96344	36.2112	1.8e-09	-0.0650625	0.0116789	31.0353	2.5e-08	31.1307	2.4e-08
rs117791490	6	160916058	0	C	T	0.981562	0.998037	46.1682	1.1e-11	-0.055548	0.0083143	44.6361	2.4e-11	44.251	2.9e-11
rs117733303	6	160922870	0	A	G	0.98149	1	45.6948	1.4e-11	-0.0552133	0.00829342	44.322	2.8e-11	43.9239	3.4e-11
rs7452960	6	160941641	0	G	A	0.981711	0.998494	46.8248	7.8e-12	-0.0564464	0.00834615	45.7405	1.4e-11	45.3598	1.6e-11
rs3798220	6	160961137	0	T	C	0.981706	1	46.7906	7.9e-12	-0.0563835	0.00834	45.7058	1.4e-11	45.3293	1.7e-11
rs118039278	6	160985526	0	G	A	0.92043	0.991241	77.5757	1.3e-18	-0.0359465	0.00415434	74.8701	5e-18	75.3632	3.9e-18
rs74617384	6	160997118	0	A	T	0.920482	1	76.7665	1.9e-18	-0.0356621	0.00413743	74.2939	6.7e-18	74.7783	5.3e-18
rs55730499	6	161005610	0	C	T	0.91967	0.997046	78.6241	7.5e-19	-0.0360673	0.00412336	76.5113	2.2e-18	76.9561	1.7e-18
rs10455872	6	161010118	0	A	G	0.920343	1	78.6682	7.3e-19	-0.0360743	0.00413455	76.1272	2.7e-18	76.6298	2.1e-18
rs140570886	6	161013013	0	T	C	0.984482	0.96051	75.393	3.9e-18	-0.0762979	0.00920285	68.7353	1.1e-16	68.6073	1.2e-16
rs6905073	6	161067892	0	G	T	0.656908	0.991602	33.5893	6.8e-09	0.0143254	0.00236311	36.7493	1.3e-09	36.5745	1.5e-09
rs56393506	6	161089307	0	C	T	0.828432	0.959948	42.9967	5.5e-11	-0.0206247	0.00302494	46.4879	9.2e-12	46.7144	8.2e-12
rs2315065	6	161108144	0	C	A	0.89764	0.954347	40.612	1.9e-10	-0.0242369	0.00377419	41.2388	1.3e-10	41.4632	1.2e-10
rs186696265	6	161111700	0	C	T	0.985233	0.988944	80.5335	2.9e-19	-0.0802938	0.00931759	74.2603	6.8e-18	74.0612	7.6e-18
rs4252185	6	161123451	0	T	C	0.899752	0.938679	42.5191	7e-11	-0.025377	0.00384068	43.658	3.9e-11	43.8718	3.5e-11
rs184278183	6	161177756	0	C	T	0.990851	0.930587	40.5441	1.9e-10	-0.074696	0.0121537	37.7725	7.9e-10	37.8709	7.6e-10
rs143843429	6	161383079	0	A	G	0.983804	0.914585	41.592	1.1e-10	-0.0549336	0.00925584	35.2245	2.9e-09	34.8686	3.5e-09
rs141766382	6	161443939	0	G	C	0.984021	0.917093	39.5497	3.2e-10	-0.0538244	0.0093069	33.4463	7.3e-09	33.1345	8.6e-09
rs6558008	8	27438306	0	A	C	0.767923	0.98596	30.8279	2.8e-08	0.0148838	0.00266479	31.1961	2.3e-08	31.2115	2.3e-08
rs7844965	8	27442064	0	G	A	0.768058	0.987856	34.1137	5.2e-09	0.0153816	0.00266437	33.3284	7.8e-09	33.3448	7.7e-09
rs2383205	9	22060935	0	A	G	0.400167	0.997054	39.1266	4e-10	-0.0125356	0.00228674	30.0507	4.2e-08	30.4447	3.4e-08
rs2184061	9	22061562	0	C	A	0.401307	0.99691	38.7523	4.8e-10	-0.0124622	0.00228502	29.7448	4.9e-08	30.126	4e-08
rs1537378	9	22061614	0	A	G	0.40007	0.997561	39.0518	4.1e-10	-0.012513	0.00228627	29.9549	4.4e-08	30.3428	3.6e-08
rs8181050	9	22064391	0	G	A	0.401202	0.998351	38.4996	5.5e-10	-0.0124568	0.00228406	29.744	4.9e-08	30.1497	4e-08
rs1333039	9	22065657	0	G	C	0.401953	0.998631	39.5943	3.1e-10	-0.0126168	0.00228297	30.5423	3.3e-08	30.9677	2.6e-08
rs10965223	9	22067004	0	G	A	0.40245	0.998941	39.3207	3.6e-10	-0.0125437	0.0022821	30.2122	3.9e-08	30.6216	3.1e-08
rs10965224	9	22067276	0	T	A	0.402286	0.999076	39.1578	3.9e-10	-0.0125331	0.0022821	30.1611	4e-08	30.5724	3.2e-08
rs10811648	9	22067542	0	C	T	0.401553	0.997568	39.2562	3.7e-10	-0.0125701	0.00228451	30.2755	3.7e-08	30.6783	3e-08
rs10811649	9	22067554	0	C	T	0.401663	0.997874	39.4806	3.3e-10	-0.0126116	0.00228402	30.4887	3.4e-08	30.8905	2.7e-08
rs10811650	9	22067593	0	A	G	0.578276	0.997128	32.2883	1.3e-08	-0.0123612	0.00226648	29.7452	4.9e-08	29.8466	4.7e-08
rs10811651	9	22067830	0	G	A	0.402322	0.999379	39.2528	3.7e-10	-0.0125482	0.0022818	30.2416	3.8e-08	30.6572	3.1e-08
rs4977756	9	22068652	0	G	A	0.402344	1	39.3687	3.5e-10	-0.0125732	0.00228116	30.3792	3.6e-08	30.794	2.9e-08
rs4451405	9	22071750	0	C	T	0.406364	0.993131	40.5757	1.9e-10	-0.0127246	0.00228439	31.0275	2.5e-08	31.4525	2e-08
rs10757269	9	22072264	0	A	G	0.514303	0.992552	52.6195	4e-13	-0.0151733	0.00224463	45.695	1.4e-11	45.936	1.2e-11
rs9632884	9	22072301	0	G	C	0.514325	0.993368	52.3839	4.6e-13	-0.0151366	0.00224437	45.485	1.5e-11	45.7333	1.4e-11
rs9632885	9	22072638	0	G	A	0.520618	0.991575	59.0111	1.6e-14	-0.0158465	0.00224524	49.8128	1.7e-12	50.1183	1.4e-12
rs10757270	9	22072719	0	A	G	0.575459	0.989306	36.3792	1.6e-09	-0.012939	0.00227176	32.4394	1.2e-08	32.5182	1.2e-08
rs1831733	9	22076071	0	T	C	0.523327	0.990062	65.1884	6.8e-16	-0.0165801	0.00224839	54.3788	1.7e-13	54.7354	1.4e-13
rs10757271	9	22076795	0	A	G	0.511967	0.995664	61.0244	5.6e-15	-0.016203	0.00224147	52.2543	4.9e-13	52.5956	4.1e-13
rs10811652	9	22077085	0	A	C	0.512469	0.995484	60.1239	8.9e-15	-0.016124	0.00224158	51.7413	6.3e-13	52.0865	5.3e-13
rs10116277	9	22081397	0	G	T	0.518495	0.999262	63.6213	1.5e-15	-0.0164685	0.00223768	54.1641	1.8e-13	54.3957	1.6e-13
rs6475606	9	22081850	0	C	T	0.5182	1	63.1568	1.9e-15	-0.0163803	0.00223691	53.6225	2.4e-13	53.8539	2.2e-13
rs1333040	9	22083404	0	C	T	0.415559	1	39.1567	3.9e-10	-0.013391	0.00226712	34.8883	3.5e-09	35.1086	3.1e-09
rs1537370	9	22084310	0	C	T	0.519105	0.995737	64.3642	1e-15	-0.0166082	0.00224075	54.9365	1.2e-13	55.1649	1.1e-13
rs1970112	9	22085598	0	T	C	0.524882	0.992962	66.1814	4.1e-16	-0.0167447	0.00224413	55.6743	8.6e-14	55.9443	7.5e-14
rs10738606	9	22088090	0	A	T	0.512899	0.999358	72.9524	1.3e-17	-0.0175065	0.00223744	61.2209	5.1e-15	61.4282	4.6e-15
rs10738607	9	22088094	0	A	G	0.512891	0.999379	72.9942	1.3e-17	-0.017512	0.00223741	61.2607	5e-15	61.4664	4.5e-15
rs10757272	9	22088260	0	C	T	0.513807	1	72.5271	1.6e-17	-0.0174094	0.0022368	60.5779	7.1e-15	60.7705	6.4e-15
rs10757274	9	22096055	0	A	G	0.511389	1	74.0144	7.8e-18	-0.0176686	0.00223681	62.3948	2.8e-15	62.5983	2.5e-15
rs4977574	9	22098574	0	A	G	0.511583	1	76.8268	1.9e-18	-0.018022	0.00223656	64.9303	7.8e-16	65.1239	7e-16
rs2891168	9	22098619	0	A	G	0.511573	0.999374	76.0502	2.8e-18	-0.0179274	0.00223683	64.235	1.1e-15	64.4244	1e-15
rs1537371	9	22099568	0	C	A	0.502035	0.998158	75.0646	4.6e-18	-0.0180774	0.00223741	65.2797	6.5e-16	65.4831	5.9e-16
rs1556516	9	22100176	0	G	C	0.50188	0.998141	75.422	3.8e-18	-0.0181395	0.00223732	65.7349	5.2e-16	65.9299	4.7e-16
rs7859727	9	22102165	0	C	T	0.510806	0.996175	73.6687	9.2e-18	-0.0176918	0.00223836	62.4721	2.7e-15	62.6438	2.5e-15
rs1537372	9	22103183	0	G	T	0.566345	0.99017	45.8914	1.2e-11	-0.0145131	0.00226696	40.9856	1.5e-10	40.8791	1.6e-10
rs1537373	9	22103341	0	T	G	0.50259	0.997395	74.3095	6.7e-18	-0.0179648	0.00223791	64.4405	9.9e-16	64.6229	9.1e-16
rs1333042	9	22103813	0	A	G	0.501598	0.99801	74.7028	5.5e-18	-0.0180361	0.00223733	64.9865	7.5e-16	65.178	6.8e-16
rs7859362	9	22105927	0	T	C	0.487868	0.998785	66.3587	3.8e-16	-0.0171289	0.00223799	58.5788	2e-14	58.6324	1.9e-14
rs10757275	9	22106225	0	G	A	0.497597	0.997829	66.8705	2.9e-16	-0.0169321	0.00223821	57.2294	3.9e-14	57.2965	3.7e-14
rs6475609	9	22106271	0	A	G	0.487912	0.998709	66.0687	4.4e-16	-0.0170865	0.00223806	58.2862	2.3e-14	58.3416	2.2e-14
rs1333043	9	22106731	0	T	A	0.487867	0.998607	66.2999	3.9e-16	-0.0171238	0.00223814	58.5364	2e-14	58.5899	1.9e-14
rs1412834	9	22110131	0	T	C	0.487745	0.998692	66.5206	3.5e-16	-0.017149	0.00223797	58.7177	1.8e-14	58.7589	1.8e-14
rs7341786	9	22112241	0	A	C	0.484938	0.996758	64.0001	1.2e-15	-0.0167767	0.0022402	56.084	6.9e-14	56.1444	6.7e-14
rs7341791	9	22112427	0	A	G	0.484917	0.996843	64.0907	1.2e-15	-0.0167905	0.00224015	56.1787	6.6e-14	56.2322	6.4e-14
rs10511701	9	22112599	0	T	C	0.492581	0.995115	63.1983	1.9e-15	-0.0164671	0.00223994	54.0457	2e-13	54.0905	1.9e-13
rs10733376	9	22114469	0	G	C	0.487464	0.99894	66.3978	3.7e-16	-0.0171348	0.00223753	58.6437	1.9e-14	58.681	1.9e-14
rs10738609	9	22114495	0	A	G	0.499018	0.995255	64.2956	1.1e-15	-0.0166651	0.00224104	55.2989	1e-13	55.2935	1e-13
rs2383206	9	22115026	0	A	G	0.48915	0.997411	67.9995	1.6e-16	-0.017289	0.00223768	59.6953	1.1e-14	59.7341	1.1e-14
rs944797	9	22115286	0	T	C	0.489143	0.997382	67.7794	1.8e-16	-0.0172559	0.00223767	59.4679	1.2e-14	59.506	1.2e-14
rs1004638	9	22115589	0	A	T	0.487378	0.999603	66.1354	4.2e-16	-0.0170959	0.00223709	58.4009	2.1e-14	58.4293	2.1e-14
rs2383207	9	22115959	0	A	G	0.487656	1	66.9163	2.8e-16	-0.0172113	0.00223668	59.2136	1.4e-14	59.2154	1.4e-14
rs1537374	9	22116046	0	A	G	0.487432	0.999581	66.0062	4.5e-16	-0.0170714	0.00223716	58.2295	2.3e-14	58.2559	2.3e-14
rs1537375	9	22116071	0	T	C	0.495305	0.997528	65.02	7.4e-16	-0.0167357	0.00223745	55.9474	7.4e-14	55.9643	7.4e-14
rs1537376	9	22116220	0	T	C	0.489133	0.997324	67.5956	2e-16	-0.0172309	0.00223778	59.2902	1.4e-14	59.3315	1.3e-14
rs1333045	9	22119195	0	T	C	0.484993	0.993036	65.5694	5.6e-16	-0.0171465	0.00224365	58.4036	2.1e-14	58.532	2e-14
rs10217586	9	22121349	0	A	T	0.468925	0.993213	63.5513	1.6e-15	-0.0166963	0.00224693	55.2154	1.1e-13	55.4385	9.6e-14
rs10738610	9	22123766	0	A	C	0.504764	0.997428	66.8556	2.9e-16	-0.0169366	0.00223897	57.221	3.9e-14	57.279	3.8e-14
rs1333046	9	22124123	0	T	A	0.501972	0.999245	66.6637	3.2e-16	-0.0168126	0.00223687	56.4922	5.6e-14	56.5383	5.5e-14
rs7857118	9	22124140	0	A	T	0.492565	0.998102	66.0289	4.4e-16	-0.0169943	0.00223789	57.6673	3.1e-14	57.7212	3e-14
rs10757277	9	22124450	0	A	G	0.51833	0.999746	67.1278	2.5e-16	-0.0170777	0.00223799	58.2298	2.3e-14	58.1665	2.4e-14
rs10811656	9	22124472	0	C	T	0.51792	0.995612	66.626	3.3e-16	-0.0170439	0.00223998	57.8963	2.8e-14	57.8518	2.8e-14
rs10757278	9	22124477	0	A	G	0.518105	1	67.298	2.3e-16	-0.0171057	0.00223848	58.3952	2.1e-14	58.3346	2.2e-14
rs1333047	9	22124504	0	A	T	0.508854	0.998166	66.4084	3.7e-16	-0.0172504	0.00223792	59.4164	1.3e-14	59.3618	1.3e-14
rs10757279	9	22124630	0	A	G	0.518172	0.999638	67.3829	2.2e-16	-0.017111	0.00223807	58.4527	2.1e-14	58.3854	2.2e-14
rs4977575	9	22124744	0	C	G	0.508598	0.997741	67.5852	2e-16	-0.0173958	0.00223822	60.4066	7.7e-15	60.3436	8e-15
rs1333048	9	22125347	0	A	C	0.501847	1	66.3492	3.8e-16	-0.0168006	0.00223665	56.4221	5.8e-14	56.4512	5.8e-14
rs1333049	9	22125503	0	G	C	0.517858	1	74.0732	7.5e-18	-0.01796	0.00223765	64.4214	1e-15	64.4191	1e-15
rs4766517	12	111359712	0	G	C	0.412401	0.951935	31.612	1.9e-08	0.0151702	0.00232855	42.4434	7.3e-11	42.2722	7.9e-11
rs12321621	12	111360183	0	C	A	0.417207	0.969446	31.4817	2e-08	0.0151496	0.00230455	43.2142	4.9e-11	43.0396	5.4e-11
rs12302980	12	111360290	0	A	G	0.414709	0.965062	32.3734	1.3e-08	0.0153022	0.00231153	43.8235	3.6e-11	43.6351	4e-11
rs2028005	12	111361137	0	A	G	0.436216	0.977182	26.7377	2.3e-07	0.0139336	0.00228169	37.2917	1e-09	37.2016	1.1e-09
rs12828640	12	111361298	0	A	G	0.418434	0.97462	31.528	2e-08	0.0152001	0.00229757	43.7679	3.7e-11	43.5605	4.1e-11
rs7957741	12	111363516	0	T	C	0.438801	0.983568	29.3771	6e-08	0.0142635	0.00227345	39.362	3.5e-10	39.2908	3.7e-10
rs7957842	12	111363528	0	T	G	0.438833	0.983553	29.3611	6e-08	0.0142572	0.00227345	39.3274	3.6e-10	39.2564	3.7e-10
rs756823	12	111364850	0	T	C	0.453723	0.995907	22.6706	1.9e-06	0.0123354	0.00225271	29.9842	4.4e-08	29.8173	4.7e-08
rs6489835	12	111365043	0	C	T	0.492291	1	25.8238	3.7e-07	0.0122513	0.00223842	29.9559	4.4e-08	29.889	4.6e-08
rs886125	12	111365324	0	A	G	0.456933	1	24.7774	6.4e-07	0.0125858	0.00224646	31.3882	2.1e-08	31.2579	2.3e-08
rs876311	12	111366866	0	C	G	0.493713	0.993498	25.908	3.6e-07	0.0122998	0.00224296	30.0712	4.2e-08	29.9925	4.3e-08
rs2007018	12	111368171	0	A	T	0.495016	0.992513	26.2475	3e-07	0.0122889	0.00224379	29.9962	4.3e-08	29.8965	4.6e-08
rs7953254	12	111369401	0	T	G	0.480657	0.99379	31.552	1.9e-08	0.0139113	0.00224516	38.3919	5.8e-10	38.3139	6e-10
rs6489838	12	111370484	0	G	A	0.481563	0.992554	29.589	5.3e-08	0.0135276	0.00224628	36.2669	1.7e-09	36.1737	1.8e-09
rs4766519	12	111370980	0	C	T	0.481138	0.994052	30.6456	3.1e-08	0.0137232	0.00224457	37.3807	9.7e-10	37.2994	1e-09
rs7316015	12	111371187	0	C	A	0.481238	0.993836	30.6788	3e-08	0.0137345	0.00224481	37.4342	9.5e-10	37.3495	9.9e-10
rs4426183	12	111373404	0	T	C	0.428782	0.993	34.0639	5.3e-09	0.0153237	0.00226991	45.5733	1.5e-11	45.3343	1.7e-11
rs1056618	12	111375170	0	A	G	0.448792	0.999364	28.1159	1.1e-07	0.0139473	0.00225175	38.3658	5.9e-10	38.1992	6.4e-10
rs1056620	12	111375172	0	C	T	0.448932	1	27.807	1.3e-07	0.0138609	0.00225093	37.9193	7.4e-10	37.7473	8.1e-10
rs4540879	12	111375833	0	A	G	0.448681	0.998244	28.082	1.2e-07	0.0139324	0.00225238	38.2624	6.2e-10	38.0985	6.7e-10
rs2879518	12	111376046	0	G	C	0.44606	0.998707	26.0434	3.3e-07	0.0136498	0.0022532	36.6988	1.4e-09	36.481	1.5e-09
rs7979656	12	111376637	0	C	T	0.484278	0.995757	30.2431	3.8e-08	0.0137705	0.00224306	37.6894	8.3e-10	37.5594	8.9e-10
rs10849918	12	111376921	0	T	C	0.446259	0.998465	26.0063	3.4e-07	0.0136265	0.00225371	36.5573	1.5e-09	36.3577	1.6e-09
rs10849919	12	111377002	0	G	A	0.449153	0.998021	27.7779	1.4e-07	0.0138814	0.00225246	37.9798	7.1e-10	37.8254	7.7e-10
rs10849920	12	111377051	0	C	T	0.449145	0.998177	27.9474	1.2e-07	0.0139051	0.00225229	38.1149	6.7e-10	37.9661	7.2e-10
rs12580337	12	111377530	0	C	T	0.484484	0.995862	30.2385	3.8e-08	0.0137791	0.00224275	37.7469	8.1e-10	37.6191	8.6e-10
rs11065780	12	111381949	0	G	C	0.484558	0.995381	30.0106	4.3e-08	0.0137399	0.00224282	37.5299	9e-10	37.4111	9.6e-10
rs11065781	12	111382409	0	C	A	0.449161	0.998123	27.6582	1.4e-07	0.0138612	0.00225229	37.8753	7.5e-10	37.7225	8.2e-10
rs10774611	12	111383036	0	G	A	0.432865	0.987169	21.7026	3.2e-06	0.0126159	0.00227055	30.8729	2.8e-08	30.7587	2.9e-08
rs6489844	12	111385296	0	A	G	0.484448	0.995545	29.7734	4.9e-08	0.0136932	0.002243	37.2691	1e-09	37.1398	1.1e-09
rs2106409	12	111385998	0	G	C	0.446115	0.997468	25.5908	4.2e-07	0.0135417	0.00225483	36.0677	1.9e-09	35.8688	2.1e-09
rs2106408	12	111386018	0	A	C	0.484137	0.994704	29.9071	4.5e-08	0.0137132	0.00224411	37.3414	9.9e-10	37.212	1.1e-09
rs2157873	12	111386667	0	G	T	0.449091	0.997778	27.7232	1.4e-07	0.0138618	0.00225255	37.8694	7.6e-10	37.717	8.2e-10
rs4766521	12	111386961	0	T	C	0.484436	0.995763	30.0288	4.3e-08	0.0137396	0.00224279	37.5295	9e-10	37.3997	9.6e-10
rs3919447	12	111391799	0	C	T	0.484474	0.995844	29.922	4.5e-08	0.0137168	0.00224273	37.4066	9.6e-10	37.2779	1e-09
rs4766522	12	111393519	0	T	G	0.446348	0.998664	26.0326	3.4e-07	0.0136494	0.00225339	36.6907	1.4e-09	36.4856	1.5e-09
rs2106407	12	111394327	0	T	C	0.446344	0.998735	26.095	3.3e-07	0.01366	0.00225331	36.7503	1.3e-09	36.5458	1.5e-09
rs2106406	12	111394384	0	G	A	0.445753	0.996757	26.1534	3.2e-07	0.0136904	0.00225592	36.8287	1.3e-09	36.6175	1.4e-09
rs2106405	12	111394644	0	G	A	0.44504	0.995025	26.0586	3.3e-07	0.0136992	0.00225847	36.7929	1.3e-09	36.5949	1.5e-09
rs2106404	12	111394645	0	T	C	0.445739	0.993553	25.8107	3.8e-07	0.0136714	0.0022598	36.6005	1.4e-09	36.4213	1.6e-09
rs12425190	12	111394929	0	C	A	0.446337	0.998823	26.0796	3.3e-07	0.0136562	0.00225325	36.7317	1.4e-09	36.5265	1.5e-09
rs7956143	12	111395150	0	C	T	0.446339	0.998829	26.0729	3.3e-07	0.0136545	0.00225324	36.7228	1.4e-09	36.5178	1.5e-09
rs2339706	12	111396419	0	G	A	0.446361	0.998857	26.0471	3.3e-07	0.0136497	0.00225325	36.6968	1.4e-09	36.4913	1.5e-09
rs4509829	12	111396613	0	C	T	0.446346	0.998926	26.0681	3.3e-07	0.0136531	0.00225318	36.7172	1.4e-09	36.5117	1.5e-09
rs11838131	12	111396958	0	A	G	0.446358	0.999172	25.8069	3.8e-07	0.0135929	0.00225321	36.3936	1.6e-09	36.1931	1.8e-09
rs12818548	12	111398098	0	T	C	0.484495	0.995254	29.9211	4.5e-08	0.0137239	0.00224323	37.4289	9.5e-10	37.301	1e-09
rs4766523	12	111399179	0	A	G	0.446406	0.999529	25.9952	3.4e-07	0.0136367	0.00225292	36.6376	1.4e-09	36.429	1.6e-09
rs4766524	12	111399446	0	T	C	0.446295	0.999464	26.014	3.4e-07	0.0136242	0.00225295	36.5692	1.5e-09	36.3617	1.6e-09
rs4766525	12	111399660	0	T	C	0.484533	0.99659	29.9234	4.5e-08	0.0137151	0.00224226	37.413	9.6e-10	37.2758	1e-09
rs7961663	12	111399771	0	G	A	0.44644	1	25.9449	3.5e-07	0.013629	0.00225301	36.5935	1.5e-09	36.3783	1.6e-09
rs7961935	12	111400006	0	G	A	0.446575	0.999364	25.5055	4.4e-07	0.0135333	0.00225289	36.0849	1.9e-09	35.8812	2.1e-09
rs7978821	12	111400116	0	A	G	0.446548	0.999236	25.4734	4.5e-07	0.0135278	0.002253	36.0523	1.9e-09	35.8523	2.1e-09
rs4766438	12	111400625	0	T	C	0.446315	0.998834	25.8921	3.6e-07	0.0135998	0.0022535	36.4206	1.6e-09	36.2132	1.8e-09
rs4766439	12	111400836	0	C	T	0.446318	0.998666	25.9038	3.6e-07	0.0136037	0.00225368	36.436	1.6e-09	36.2284	1.8e-09
rs4766440	12	111401223	0	C	T	0.445899	0.996693	26.0039	3.4e-07	0.0136478	0.00225589	36.6005	1.4e-09	36.3967	1.6e-09
rs4766526	12	111401316	0	G	T	0.484593	0.995485	30.1119	4.1e-08	0.013761	0.00224339	37.6263	8.6e-10	37.4909	9.2e-10
rs4766441	12	111401662	0	A	G	0.446588	0.993214	25.9205	3.6e-07	0.0136564	0.00225959	36.5269	1.5e-09	36.32	1.7e-09
rs4766442	12	111401693	0	G	A	0.446533	0.992322	26.0006	3.4e-07	0.0136883	0.00226029	36.6749	1.4e-09	36.4669	1.6e-09
rs4766443	12	111401798	0	A	G	0.446363	0.993259	26.022	3.4e-07	0.0136795	0.00225938	36.6576	1.4e-09	36.442	1.6e-09
rs12815195	12	111402363	0	T	C	0.44634	0.993118	25.9784	3.5e-07	0.0136724	0.00225952	36.6146	1.4e-09	36.3978	1.6e-09
rs4766527	12	111405470	0	T	G	0.446559	0.990795	25.4313	4.6e-07	0.013588	0.00226113	36.1126	1.9e-09	35.9135	2.1e-09
rs993966	12	111406026	0	G	C	0.48475	0.988481	29.9049	4.5e-08	0.0137727	0.0022503	37.4592	9.3e-10	37.3364	9.9e-10
rs993965	12	111406373	0	A	T	0.484493	0.989214	30.0708	4.2e-08	0.0137908	0.00224987	37.5722	8.8e-10	37.4374	9.4e-10
rs12814105	12	111406836	0	A	G	0.484774	0.988413	29.8065	4.8e-08	0.0137448	0.00225022	37.31	1e-09	37.1881	1.1e-09
rs12311973	12	111407366	0	G	T	0.484783	0.988342	29.7361	5e-08	0.0137317	0.0022503	37.2363	1e-09	37.1141	1.1e-09
rs12307294	12	111407459	0	T	G	0.44639	0.991758	25.695	4e-07	0.0136186	0.00226102	36.279	1.7e-09	36.0716	1.9e-09
rs12425324	12	111407697	0	G	A	0.484785	0.988339	29.7092	5e-08	0.0137239	0.00225033	37.1933	1.1e-09	37.0716	1.1e-09
rs991817	12	111410537	0	A	G	0.442051	0.989285	25.4297	4.6e-07	0.0134223	0.00226601	35.0858	3.2e-09	34.9669	3.4e-09
rs11065784	12	111412463	0	A	G	0.480226	0.973293	30.1283	4e-08	0.013741	0.00226708	36.7369	1.4e-09	36.6726	1.4e-09
rs11065785	12	111412908	0	C	T	0.445744	0.973085	25.6945	4e-07	0.0134711	0.00228159	34.8604	3.5e-09	34.7055	3.8e-09
rs1265564	12	111708458	0	A	C	0.557672	0.964513	30.0782	4.1e-08	-0.0133386	0.0022924	33.8566	5.9e-09	33.7812	6.2e-09
rs10774624	12	111833788	0	G	A	0.486552	0.980118	47.2494	6.3e-12	0.0162294	0.00226119	51.5144	7.1e-13	51.4088	7.5e-13
rs7310615	12	111865049	0	C	G	0.482106	0.986398	49.8163	1.7e-12	0.016699	0.00225485	54.8457	1.3e-13	54.8351	1.3e-13
rs3184504	12	111884608	0	T	C	0.482374	1	51.4372	7.4e-13	0.0168477	0.00223856	56.6428	5.2e-14	56.6027	5.3e-14
rs4766578	12	111904371	0	T	A	0.495617	0.998633	52.3379	4.7e-13	0.016825	0.00223947	56.4447	5.8e-14	56.3064	6.2e-14
rs10774625	12	111910219	0	A	G	0.496021	1	52.9727	3.4e-13	0.0169348	0.00223782	57.2675	3.8e-14	57.1224	4.1e-14
rs7137828	12	111932800	0	C	T	0.483373	0.997488	52.1878	5e-13	0.0170014	0.0022411	57.5502	3.3e-14	57.5149	3.4e-14
rs597808	12	111973358	0	A	G	0.483653	0.993731	50.0046	1.5e-12	0.0167063	0.00224527	55.3632	1e-13	55.3027	1e-13
rs653178	12	112007756	0	C	T	0.483103	1	49.5814	1.9e-12	0.016546	0.00223853	54.6339	1.5e-13	54.5925	1.5e-13
rs11065979	12	112059557	0	C	T	0.562141	0.995657	46.4386	9.5e-12	-0.0158643	0.00225969	49.2888	2.2e-12	49.2395	2.3e-12
rs11065987	12	112072424	0	A	G	0.584649	1	34.9689	3.4e-09	-0.0147913	0.00226966	42.4707	7.2e-11	42.4914	7.1e-11
rs11065991	12	112083162	0	C	T	0.585446	0.99915	35.6654	2.3e-09	-0.0149208	0.00227136	43.1534	5.1e-11	43.1612	5e-11
rs2013002	12	112200150	0	T	C	0.413274	0.987666	35.1686	3e-09	0.0148742	0.00228592	42.3396	7.7e-11	42.3445	7.7e-11
rs11513729	12	112273499	0	C	T	0.588045	0.971734	36.3228	1.7e-09	-0.015227	0.00230569	43.6141	4e-11	43.5849	4.1e-11
rs17696736	12	112486818	0	A	G	0.571276	1	35.5019	2.5e-09	-0.0145323	0.00226018	41.3411	1.3e-10	41.2505	1.3e-10
rs10850001	12	112553032	0	T	A	0.568694	0.969043	33.279	8e-09	-0.0139192	0.00229362	36.8286	1.3e-09	36.922	1.2e-09
rs17630235	12	112591686	0	G	A	0.592473	1	34.7755	3.7e-09	-0.0147919	0.00227622	42.2301	8.1e-11	42.1974	8.3e-11
rs11066188	12	112610714	0	G	A	0.592325	0.996935	34.5414	4.2e-09	-0.014766	0.00227925	41.9704	9.3e-11	41.9362	9.4e-11
rs7953257	12	112684221	0	A	T	0.40461	0.97059	33.3548	7.7e-09	0.014675	0.00231359	40.2332	2.3e-10	40.1646	2.3e-10
rs11066301	12	112871372	0	A	G	0.57437	1	33.5715	6.9e-09	-0.0141657	0.00226339	39.1706	3.9e-10	39.0774	4.1e-10
rs11066309	12	112883476	0	G	A	0.592058	0.996108	33.9045	5.8e-09	-0.0146423	0.00228052	41.2243	1.4e-10	41.2023	1.4e-10
rs11066320	12	112906415	0	A	G	0.424451	0.994925	32.3603	1.3e-08	0.0140197	0.00226954	38.1593	6.5e-10	38.0406	6.9e-10
rs4899535	14	75255081	0	T	C	0.307352	0.999859	49.751	1.7e-12	-0.0132801	0.00242441	30.0046	4.3e-08	30.0688	4.2e-08
rs12887044	14	75255659	0	C	T	0.30722	0.999596	49.3148	2.2e-12	-0.0132185	0.00242517	29.7082	5e-08	29.7775	4.8e-08
rs61978928	14	75321714	0	T	C	0.688374	0.996661	50.9799	9.3e-13	0.0135715	0.00241753	31.5145	2e-08	31.5236	2e-08
rs17102847	14	75324780	0	A	G	0.688548	0.997008	50.244	1.4e-12	0.0134431	0.00241761	30.919	2.7e-08	30.929	2.7e-08
rs2080086	14	75338408	0	G	A	0.688399	0.996482	49.8556	1.7e-12	0.0133665	0.00241821	30.5527	3.2e-08	30.5526	3.2e-08
rs11851433	14	75339450	0	A	G	0.688223	0.996217	49.9807	1.6e-12	0.0133707	0.002418	30.5771	3.2e-08	30.58	3.2e-08
rs4887053	15	78712699	0	A	C	0.208407	0.993109	35.986	2e-09	-0.0175788	0.00276313	40.4741	2e-10	40.3262	2.1e-10
rs2869032	15	78714561	0	C	T	0.208347	0.994289	36.1141	1.9e-09	-0.0176231	0.00276191	40.7142	1.8e-10	40.5769	1.9e-10
rs2869045	15	78718899	0	T	C	0.20808	0.993936	36.6935	1.4e-09	-0.0177368	0.00276347	41.1947	1.4e-10	41.052	1.5e-10
rs72736802	15	78719501	0	A	T	0.652707	0.984038	75.8279	3.1e-18	-0.0218609	0.00236693	85.3034	2.6e-20	85.249	2.6e-20
rs72738704	15	78719832	0	G	C	0.674635	0.994263	81.0241	2.2e-19	-0.0228151	0.00239549	90.7099	1.7e-21	90.5921	1.8e-21
rs2656055	15	78720194	0	C	A	0.218893	0.993103	39.7607	2.9e-10	-0.0178889	0.0027135	43.4615	4.3e-11	43.3605	4.6e-11
rs2568497	15	78721397	0	G	T	0.218375	0.994656	39.1048	4e-10	-0.0177605	0.00271377	42.8314	6e-11	42.7272	6.3e-11
rs2568499	15	78722359	0	T	C	0.21828	0.9954	38.8198	4.6e-10	-0.0177134	0.00271321	42.6225	6.6e-11	42.5146	7e-11
rs2656056	15	78722519	0	T	C	0.218278	0.995419	38.8696	4.5e-10	-0.0177219	0.0027132	42.6637	6.5e-11	42.5563	6.9e-11
rs11072763	15	78724256	0	A	G	0.222524	0.996042	39.056	4.1e-10	-0.0173002	0.00269406	41.2372	1.3e-10	41.1694	1.4e-10
rs1394371	15	78724469	0	C	T	0.722693	1	62.9961	2.1e-15	-0.0211456	0.00249861	71.6209	2.6e-17	71.5021	2.8e-17
rs2036528	15	78726271	0	G	C	0.218347	0.996061	39.0892	4e-10	-0.0176936	0.00271182	42.5705	6.8e-11	42.4863	7.1e-11
rs2036529	15	78726272	0	A	T	0.218348	0.996064	39.1024	4e-10	-0.017696	0.00271181	42.5824	6.8e-11	42.4979	7.1e-11
rs2656070	15	78730252	0	A	G	0.218702	0.996051	39.9803	2.6e-10	-0.0178705	0.00271062	43.4644	4.3e-11	43.3819	4.5e-11
rs17483548	15	78730313	0	G	A	0.676002	0.997591	86.9594	1.1e-20	-0.0236423	0.00239467	97.4742	5.5e-23	97.3098	5.9e-23
rs17405217	15	78731149	0	C	T	0.676	0.997502	86.893	1.1e-20	-0.0236365	0.00239472	97.4227	5.6e-23	97.263	6.1e-23
rs924840	15	78731808	0	T	A	0.21865	0.996378	39.8373	2.8e-10	-0.0178447	0.00271036	43.3474	4.6e-11	43.2675	4.8e-11
rs2938671	15	78732754	0	A	G	0.218561	0.99789	39.6621	3e-10	-0.0177813	0.00270891	43.0859	5.2e-11	43.0045	5.5e-11
rs17483686	15	78733390	0	A	T	0.672316	0.997734	87.4717	8.5e-21	-0.0237447	0.00238661	98.9854	2.5e-23	98.8089	2.8e-23
rs17483721	15	78733731	0	T	C	0.672181	0.997286	87.2313	9.7e-21	-0.0237175	0.00238691	98.7338	2.9e-23	98.5646	3.1e-23
rs55983731	15	78735269	0	C	T	0.672283	0.997742	87.5836	8.1e-21	-0.0237567	0.00238657	99.0884	2.4e-23	98.9102	2.6e-23
rs72738718	15	78735438	0	G	C	0.672282	0.99775	87.5798	8.1e-21	-0.0237563	0.00238656	99.0859	2.4e-23	98.9076	2.6e-23
rs2568488	15	78736593	0	T	A	0.21831	0.998712	38.7817	4.7e-10	-0.0176243	0.00270913	42.3215	7.7e-11	42.2473	8e-11
rs2568489	15	78737483	0	T	A	0.612525	0.939949	64.7212	8.6e-16	-0.0203467	0.00236985	73.7135	9e-18	73.9241	8.1e-18
rs2568490	15	78738370	0	T	C	0.218332	0.999083	38.9253	4.4e-10	-0.0176319	0.00270872	42.3711	7.5e-11	42.2965	7.8e-11
rs2915695	15	78739471	0	T	C	0.218285	0.999285	38.6821	5e-10	-0.0175934	0.00270857	42.191	8.3e-11	42.1155	8.6e-11
rs2089162	15	78739763	0	A	G	0.67569	0.99806	87.5242	8.3e-21	-0.0236991	0.00239348	98.0398	4.1e-23	97.8695	4.5e-23
rs2568493	15	78740233	0	G	A	0.218346	0.999458	38.9811	4.3e-10	-0.0176387	0.00270826	42.4181	7.4e-11	42.3405	7.7e-11
rs2938670	15	78740688	0	T	G	0.671602	0.997856	87.2309	9.7e-21	-0.0237479	0.0023848	99.1625	2.3e-23	98.9663	2.6e-23
rs2656052	15	78740932	0	A	C	0.671621	0.997816	87.1869	9.9e-21	-0.0237474	0.0023849	99.1498	2.3e-23	98.9519	2.6e-23
rs2568494	15	78740964	0	G	A	0.67162	0.997828	87.1879	9.9e-21	-0.0237476	0.00238489	99.1521	2.3e-23	98.9542	2.6e-23
rs2656074	15	78741384	0	T	C	0.21856	1	39.2919	3.6e-10	-0.0177323	0.00270746	42.8949	5.8e-11	42.8243	6e-11
rs7181486	15	78741618	0	T	C	0.672128	0.998172	88.07	6.3e-21	-0.0237925	0.00238579	99.4522	2e-23	99.2714	2.2e-23
rs2656073	15	78742276	0	T	G	0.218284	0.999483	39.191	3.8e-10	-0.0176906	0.00270846	42.6618	6.5e-11	42.5829	6.8e-11
rs17483929	15	78742376	0	G	A	0.672112	0.998129	88.5083	5.1e-21	-0.0238522	0.00238579	99.9524	1.6e-23	99.7673	1.7e-23
rs56219465	15	78742579	0	A	G	0.672119	0.998089	88.518	5e-21	-0.0238541	0.00238582	99.9663	1.6e-23	99.7815	1.7e-23
rs2958719	15	78743029	0	G	A	0.218283	0.999471	39.1619	3.9e-10	-0.017683	0.00270848	42.6245	6.6e-11	42.5459	6.9e-11
rs2656072	15	78744292	0	A	G	0.218297	0.999447	39.2961	3.6e-10	-0.0177047	0.00270843	42.7309	6.3e-11	42.6511	6.5e-11
rs2656071	15	78745343	0	T	A	0.218267	0.999332	39.1196	4e-10	-0.0176855	0.00270856	42.6343	6.6e-11	42.552	6.9e-11
rs2656069	15	78745707	0	C	T	0.218331	0.999365	39.3355	3.6e-10	-0.0177164	0.00270836	42.7898	6.1e-11	42.7112	6.3e-11
rs2656065	15	78750549	0	G	A	0.671226	0.998136	87.7952	7.3e-21	-0.0238637	0.00238392	100.205	1.4e-23	100.001	1.5e-23
rs11637656	15	78751961	0	C	T	0.382735	0.997968	57.1558	4e-14	-0.0180764	0.00230374	61.5682	4.3e-15	61.1745	5.2e-15
rs2568485	15	78752114	0	C	T	0.218586	0.999424	38.3672	5.9e-10	-0.0175757	0.00270696	42.1562	8.4e-11	42.0745	8.8e-11
rs72738732	15	78752188	0	C	G	0.675503	0.998248	88.7243	4.5e-21	-0.0238663	0.00239281	99.4841	2e-23	99.311	2.2e-23
rs2568483	15	78752343	0	G	A	0.218413	0.999347	39.25	3.7e-10	-0.0176889	0.00270792	42.6707	6.5e-11	42.5881	6.8e-11
rs1964678	15	78754000	0	A	G	0.380987	1	54.247	1.8e-13	-0.0176036	0.00230361	58.3962	2.1e-14	57.9802	2.6e-14
rs2009746	15	78754102	0	A	G	0.670898	0.997895	89.2312	3.5e-21	-0.0238969	0.00238359	100.513	1.2e-23	100.355	1.3e-23
rs2938674	15	78757913	0	C	A	0.78163	0.998801	39.1302	4e-10	0.017667	0.00270829	42.5535	6.9e-11	42.4695	7.2e-11
rs958025	15	78759348	0	C	T	0.772976	0.97538	38.4733	5.6e-10	0.0173877	0.00270377	41.3565	1.3e-10	41.2503	1.3e-10
rs4887057	15	78760918	0	G	A	0.617703	0.999539	56.7311	5e-14	0.0179889	0.00230227	61.0515	5.6e-15	60.6644	6.8e-15
rs17484235	15	78761414	0	C	G	0.675407	0.998802	88.8082	4.4e-21	-0.0238529	0.00239177	99.4591	2e-23	99.2945	2.2e-23
rs28480606	15	78762313	0	A	G	0.781659	0.999376	39.1216	4e-10	0.0176589	0.00270771	42.5326	7e-11	42.4474	7.3e-11
rs7174190	15	78763617	0	C	T	0.781667	0.999414	39.1395	3.9e-10	0.0176623	0.00270771	42.5493	6.9e-11	42.4627	7.2e-11
rs72738736	15	78765122	0	G	T	0.672115	0.998645	89.1879	3.6e-21	-0.0239366	0.0023849	100.736	1.1e-23	100.561	1.1e-23
rs12593229	15	78765290	0	T	G	0.382487	0.999875	56.9935	4.4e-14	-0.0180074	0.00230189	61.1977	5.2e-15	60.8025	6.3e-15
rs1504550	15	78766250	0	A	G	0.676762	0.998372	86.5416	1.4e-20	-0.0236234	0.00239475	97.3121	5.9e-23	97.1737	6.4e-23
rs1504549	15	78766629	0	C	T	0.383278	0.999897	55.7645	8.2e-14	-0.0178493	0.0023009	60.1788	8.7e-15	59.7834	1.1e-14
rs12910910	15	78767850	0	C	T	0.382858	0.999889	56.5238	5.6e-14	-0.0179841	0.00230142	61.0637	5.5e-15	60.6691	6.8e-15
rs28602670	15	78768167	0	C	G	0.781397	0.999373	38.2342	6.3e-10	0.0175468	0.00270652	42.0314	9e-11	41.9449	9.4e-11
rs8043227	15	78768871	0	C	G	0.382815	0.999831	56.4718	5.7e-14	-0.0179782	0.00230151	61.0195	5.7e-15	60.6271	6.9e-15
rs12916801	15	78769130	0	A	G	0.382814	0.999842	56.4637	5.7e-14	-0.0179771	0.00230151	61.0118	5.7e-15	60.6194	6.9e-15
rs11072766	15	78771546	0	C	T	0.781335	0.999387	38.7357	4.9e-10	0.0176469	0.00270636	42.5175	7e-11	42.4299	7.3e-11
rs17484524	15	78772676	0	A	G	0.675535	0.998736	87.4025	8.9e-21	-0.0236896	0.00239216	98.0696	4e-23	97.9098	4.4e-23
rs35031105	15	78772806	0	C	T	0.781032	0.999146	38.9445	4.4e-10	0.0176875	0.0027052	42.7499	6.2e-11	42.657	6.5e-11
rs8042238	15	78774271	0	C	T	0.382887	1	57.1545	4e-14	-0.0180827	0.00230138	61.7377	3.9e-15	61.3529	4.8e-15
rs8042260	15	78774374	0	A	G	0.38288	0.999917	57.0214	4.3e-14	-0.0180598	0.00230139	61.5809	4.2e-15	61.1885	5.2e-15
rs10851906	15	78774676	0	A	G	0.781117	0.998801	38.905	4.4e-10	0.0176996	0.00270588	42.787	6.1e-11	42.6998	6.4e-11
rs16969894	15	78776456	0	C	T	0.780598	0.997954	38.799	4.7e-10	0.017693	0.00270471	42.7917	6.1e-11	42.7235	6.3e-11
rs12903285	15	78778953	0	A	G	0.388084	0.98934	54.3628	1.7e-13	-0.0177671	0.00230825	59.2474	1.4e-14	58.9196	1.6e-14
rs12903295	15	78778972	0	A	G	0.382961	0.999552	55.7807	8.1e-14	-0.0178913	0.00230144	60.4348	7.6e-15	60.0326	9.3e-15
rs12904234	15	78779384	0	C	T	0.382981	0.999589	55.7544	8.2e-14	-0.0178855	0.00230136	60.3997	7.7e-15	59.9988	9.5e-15
rs36146269	15	78779510	0	T	A	0.383318	0.999852	55.9065	7.6e-14	-0.0178641	0.00230088	60.28	8.2e-15	59.8887	1e-14
rs12101809	15	78779801	0	C	T	0.781079	0.998699	39.0364	4.2e-10	0.0177075	0.00270597	42.8219	6e-11	42.737	6.3e-11
rs2036533	15	78781687	0	G	A	0.781083	0.998879	38.6771	5e-10	0.0176432	0.00270571	42.5201	7e-11	42.4325	7.3e-11
rs4887059	15	78782095	0	C	T	0.383342	0.999916	55.9005	7.6e-14	-0.0178652	0.0023008	60.2917	8.2e-15	59.8988	1e-14
rs28511883	15	78783683	0	C	T	0.781031	0.998897	38.8983	4.5e-10	0.0176732	0.00270556	42.6693	6.5e-11	42.5814	6.8e-11
rs965604	15	78789223	0	G	A	0.383357	0.999934	55.9722	7.4e-14	-0.0178811	0.00230082	60.3979	7.7e-15	59.9981	9.5e-15
rs13180	15	78789488	0	C	T	0.383463	1	56.0702	7e-14	-0.0178865	0.00230071	60.4408	7.6e-15	60.0402	9.3e-15
rs12899351	15	78792398	0	T	C	0.383039	0.999748	56.608	5.3e-14	-0.0179937	0.00230136	61.1327	5.3e-15	60.7305	6.5e-15
rs7174348	15	78792439	0	G	A	0.78107	0.998871	38.8189	4.7e-10	0.0176681	0.00270565	42.6418	6.6e-11	42.5523	6.9e-11
rs1062980	15	78792527	0	T	C	0.617397	0.999555	55.2388	1.1e-13	0.0178697	0.00230188	60.2656	8.3e-15	59.8471	1e-14
rs12594711	15	78793921	0	C	T	0.383376	0.999905	55.7659	8.2e-14	-0.017855	0.00230086	60.2198	8.5e-15	59.8185	1e-14
rs4362358	15	78796104	0	C	T	0.383201	0.997975	55.9767	7.3e-14	-0.0178879	0.00230313	60.3225	8.1e-15	59.9194	9.9e-15
rs74925218	15	78796732	0	C	T	0.781046	0.993619	38.3964	5.8e-10	0.0175915	0.00271199	42.0755	8.8e-11	41.9959	9.1e-11
rs9672608	15	78797463	0	T	A	0.780042	0.989108	38.0106	7e-10	0.0175002	0.00271325	41.6014	1.1e-10	41.4939	1.2e-10
rs11852372	15	78801394	0	A	C	0.66601	0.994346	101.772	6.2e-24	-0.0250123	0.00238067	110.385	8.1e-26	110.584	7.3e-26
rs9788682	15	78802586	0	G	A	0.788236	0.989608	55.448	9.6e-14	0.0206344	0.00275005	56.2993	6.2e-14	56.2484	6.4e-14
rs9788721	15	78802869	0	C	T	0.339663	1	102.055	5.4e-24	0.0249794	0.00236411	111.643	4.3e-26	111.9	3.8e-26
rs7164594	15	78803057	0	C	T	0.778229	0.991602	63.2328	1.8e-15	0.0213674	0.00270203	62.5346	2.6e-15	62.4122	2.8e-15
rs8034191	15	78806023	0	T	C	0.66619	1	100.7	1.1e-23	-0.0249649	0.00237447	110.542	7.5e-26	110.751	6.7e-26
rs28437878	15	78807872	0	C	T	0.779943	0.991315	64.6846	8.8e-16	0.0217642	0.00270964	64.5153	9.6e-16	64.3651	1e-15
rs12438181	15	78812098	0	G	A	0.779754	0.991048	64.8989	7.9e-16	0.0217504	0.00270884	64.4719	9.8e-16	64.3235	1.1e-15
rs12441426	15	78812329	0	T	C	0.779643	0.991579	64.611	9.1e-16	0.0217123	0.002708	64.2854	1.1e-15	64.1435	1.2e-15
rs10519203	15	78814046	0	G	A	0.335071	1	102.053	5.4e-24	0.0250802	0.00237189	111.808	3.9e-26	111.989	3.6e-26
rs7181245	15	78814389	0	C	T	0.779468	0.992418	64.8636	8e-16	0.0216985	0.00270663	64.2689	1.1e-15	64.121	1.2e-15
rs7181447	15	78814567	0	A	G	0.779455	0.992467	64.8354	8.1e-16	0.0216984	0.00270652	64.2736	1.1e-15	64.1262	1.2e-15
rs7163730	15	78814681	0	A	G	0.77964	0.992468	65.0166	7.4e-16	0.0217581	0.00270732	64.5896	9.2e-16	64.4415	9.9e-16
rs61204066	15	78815298	0	G	A	0.77963	0.992419	64.6388	9e-16	0.0216968	0.0027074	64.2226	1.1e-15	64.0748	1.2e-15
rs8031948	15	78816057	0	G	T	0.666333	0.999083	99.6728	1.8e-23	-0.0248374	0.00237504	109.363	1.4e-25	109.557	1.2e-25
rs4461039	15	78817447	0	A	T	0.77941	0.992197	64.6089	9.1e-16	0.0216557	0.00270652	64.0209	1.2e-15	63.8747	1.3e-15
rs8042849	15	78817929	0	C	T	0.341002	0.998891	103.598	2.5e-24	0.025106	0.00236253	112.928	2.2e-26	113.119	2e-26
rs12441354	15	78821016	0	G	A	0.779861	0.992284	63.4474	1.6e-15	0.0215244	0.00270844	63.1569	1.9e-15	63.0311	2e-15
rs7169584	15	78822660	0	A	T	0.779787	0.99293	63.5185	1.6e-15	0.0214982	0.0027072	63.0612	2e-15	62.9304	2.1e-15
rs12438659	15	78824924	0	G	A	0.779692	0.993135	63.4243	1.7e-15	0.0214689	0.00270652	62.9216	2.2e-15	62.8005	2.3e-15
rs3885951	15	78825917	0	A	G	0.906304	1	25.8848	3.6e-07	-0.0219761	0.00384238	32.7115	1.1e-08	32.3604	1.3e-08
rs931794	15	78826180	0	G	A	0.335166	1	100.245	1.3e-23	0.0248761	0.0023716	110.023	9.7e-26	110.252	8.6e-26
rs2036534	15	78826948	0	T	C	0.779809	0.993184	63.402	1.7e-15	0.0214737	0.002707	62.9272	2.1e-15	62.7961	2.3e-15
rs72738786	15	78828086	0	G	T	0.666793	0.999702	101.401	7.5e-24	-0.0249811	0.00237507	110.629	7.1e-26	110.855	6.4e-26
rs12439240	15	78829091	0	T	C	0.779087	0.993246	65.7335	5.2e-16	0.02178	0.00270391	64.8826	7.9e-16	64.7476	8.5e-16
rs34664138	15	78831624	0	T	G	0.77921	0.993208	65.6742	5.3e-16	0.0217848	0.0027045	64.8835	7.9e-16	64.7411	8.5e-16
rs34138960	15	78831668	0	A	G	0.779208	0.993224	65.6814	5.3e-16	0.0217858	0.00270448	64.8903	7.9e-16	64.7477	8.5e-16
rs35212593	15	78831826	0	G	A	0.779224	0.993117	65.7252	5.2e-16	0.0217932	0.00270456	64.931	7.8e-16	64.7854	8.4e-16
rs56117933	15	78832349	0	T	C	0.794322	0.96936	63.5872	1.5e-15	-0.0236897	0.00281053	71.0467	3.5e-17	71.2797	3.1e-17
rs3813570	15	78832832	0	T	C	0.779089	0.992898	65.8152	5e-16	0.0217981	0.00270447	64.9638	7.6e-16	64.8216	8.2e-16
rs57064725	15	78833036	0	C	A	0.777824	0.993109	62.9394	2.1e-15	0.0212739	0.00269818	62.1658	3.2e-15	62.0413	3.4e-15
rs59133824	15	78833450	0	C	A	0.780736	0.988383	67.6003	2e-16	0.022219	0.00271731	66.8603	2.9e-16	66.6936	3.2e-16
rs59683676	15	78833453	0	T	C	0.780735	0.988434	67.6334	2e-16	0.0222293	0.00271733	66.9218	2.8e-16	66.7536	3.1e-16
rs28498264	15	78837673	0	C	T	0.783658	0.990835	66.6681	3.2e-16	0.022064	0.00272658	65.4833	5.9e-16	65.3362	6.3e-16
rs113352275	15	78840567	0	C	T	0.788595	0.995143	53.0381	3.3e-13	0.0200184	0.00274575	53.1542	3.1e-13	53.1055	3.2e-13
rs905739	15	78845110	0	A	G	0.778962	0.995893	65.0121	7.4e-16	0.0216125	0.0027004	64.055	1.2e-15	63.9095	1.3e-15
rs58365910	15	78849034	0	T	C	0.667771	0.993614	97.1028	6.6e-23	-0.0247079	0.002384	107.414	3.6e-25	107.415	3.6e-25
rs72740955	15	78849779	0	C	T	0.666934	0.997097	101.321	7.8e-24	-0.0250761	0.00237872	111.13	5.5e-26	111.206	5.3e-26
rs7173514	15	78849918	0	C	T	0.771534	0.991113	61.133	5.3e-15	0.0206336	0.00267419	59.5344	1.2e-14	59.3996	1.3e-14
rs28395178	15	78850558	0	G	A	0.787425	0.992688	54.5963	1.5e-13	0.0202568	0.00274353	54.5157	1.5e-13	54.4537	1.6e-13
rs2036527	15	78851615	0	G	A	0.666739	0.997117	101.198	8.3e-24	-0.0250652	0.0023782	111.082	5.7e-26	111.174	5.4e-26
rs503464	15	78857896	0	T	A	0.771057	0.992631	59.8296	1e-14	0.0203844	0.00267068	58.2577	2.3e-14	58.0884	2.5e-14
rs55853698	15	78857939	0	T	G	0.665832	1	97.8529	4.5e-23	-0.0245924	0.0023737	107.337	3.8e-25	107.376	3.7e-25
rs55781567	15	78857986	0	C	G	0.665936	1	98.9111	2.6e-23	-0.0247349	0.00237369	108.586	2e-25	108.619	2e-25
rs684513	15	78858400	0	C	G	0.786849	0.994061	54.5514	1.5e-13	0.0202117	0.00273961	54.4287	1.6e-13	54.3268	1.7e-13
rs1711731	15	78861918	0	G	A	0.781667	0.995388	55.6828	8.5e-14	0.0203722	0.00271238	56.4126	5.9e-14	56.2075	6.5e-14
rs11633958	15	78862064	0	C	T	0.670819	0.997839	103.933	2.1e-24	-0.0253488	0.00238473	112.99	2.2e-26	112.983	2.2e-26
rs7172118	15	78862453	0	C	A	0.670633	0.998227	103.826	2.2e-24	-0.0253415	0.00238393	113	2.2e-26	112.996	2.2e-26
rs667282	15	78863472	0	T	C	0.771952	1	68.6094	1.2e-16	0.0219994	0.00266692	68.0456	1.6e-16	67.7273	1.9e-16
rs17486195	15	78865197	0	A	G	0.670538	0.999335	103.28	2.9e-24	-0.0252578	0.00238247	112.393	2.9e-26	112.396	2.9e-26
rs140330585	15	78866445	0	G	A	0.670609	0.999634	103.043	3.3e-24	-0.0252221	0.00238222	112.099	3.4e-26	112.109	3.4e-26
rs17486278	15	78867482	0	A	C	0.670166	1	102.289	4.8e-24	-0.0251489	0.00238072	111.59	4.4e-26	111.608	4.4e-26
rs2456020	15	78868398	0	C	T	0.770592	0.999668	66.3529	3.8e-16	0.0215184	0.00266125	65.3801	6.2e-16	65.1186	7.1e-16
rs72740964	15	78868636	0	G	A	0.670808	1	102.002	5.5e-24	-0.0251172	0.00238475	110.932	6.1e-26	110.904	6.2e-26
rs576982	15	78870803	0	C	T	0.771995	0.999946	68.1624	1.5e-16	0.0219176	0.00266688	67.5425	2.1e-16	67.2401	2.4e-16
rs569207	15	78873119	0	C	T	0.772021	1	67.9322	1.7e-16	0.0218943	0.00266708	67.3888	2.2e-16	67.079	2.6e-16
rs637137	15	78873976	0	T	A	0.771997	0.99989	68.2243	1.5e-16	0.0219326	0.00266697	67.631	2e-16	67.3255	2.3e-16
rs7180002	15	78873993	0	A	T	0.670546	1	103.112	3.2e-24	-0.0252284	0.00238199	112.176	3.3e-26	112.192	3.2e-26
rs1700006	15	78875623	0	A	G	0.781908	0.996646	55.8342	7.9e-14	0.0203531	0.00271153	56.3421	6.1e-14	56.1313	6.8e-14
rs56390833	15	78877381	0	C	A	0.670639	0.999898	103.018	3.3e-24	-0.0252167	0.00238195	112.076	3.4e-26	112.07	3.4e-26
rs951266	15	78878541	0	G	A	0.670568	1	101.755	6.3e-24	-0.025076	0.0023817	110.852	6.4e-26	110.855	6.4e-26
rs16969968	15	78882925	0	G	A	0.670298	1	103.346	2.8e-24	-0.0252237	0.00238109	112.219	3.2e-26	112.211	3.2e-26
rs518425	15	78883813	0	A	G	0.713268	0.999263	78.2855	8.9e-19	0.0218629	0.00247183	78.2313	9.2e-19	78.0904	9.8e-19
rs8192482	15	78886198	0	C	T	0.670216	0.999877	103.061	3.3e-24	-0.0252109	0.0023812	112.095	3.4e-26	112.064	3.5e-26
rs4887067	15	78886947	0	G	A	0.670199	0.999877	102.873	3.6e-24	-0.0251938	0.00238116	111.946	3.7e-26	111.914	3.7e-26
rs578776	15	78888400	0	G	A	0.719191	1	80.1313	3.5e-19	0.0222845	0.00248791	80.2301	3.3e-19	79.9274	3.9e-19
rs12910984	15	78891627	0	G	A	0.228775	1	67.21	2.4e-16	-0.0217743	0.00266375	66.8189	3e-16	66.4074	3.7e-16
rs7173149	15	78892374	0	T	A	0.87585	0.956311	39.6767	3e-10	0.0203897	0.00345972	34.733	3.8e-09	34.6478	4e-09
rs7359276	15	78892661	0	C	T	0.23019	0.999709	66.8951	2.9e-16	-0.0216318	0.00265819	66.2236	4e-16	65.8377	4.9e-16
rs1051730	15	78894339	0	G	A	0.66977	1	101.541	7e-24	-0.0250731	0.00237947	111.034	5.8e-26	110.982	6e-26
rs3743078	15	78894759	0	C	G	0.230591	0.999479	66.2608	4e-16	-0.0215143	0.00265668	65.5811	5.6e-16	65.1984	6.8e-16
rs1317286	15	78896129	0	A	G	0.668243	1	104.447	1.6e-24	-0.025403	0.00237732	114.182	1.2e-26	114.108	1.2e-26
rs938682	15	78896547	0	G	A	0.228567	1	68.9639	1e-16	-0.022063	0.0026645	68.564	1.2e-16	68.1573	1.5e-16
rs548434102	15	78896993	0	G	T	0.719191	1	80.1313	3.5e-19	0.0222845	0.00248791	80.2301	3.3e-19	79.9274	3.9e-19
rs12914385	15	78898723	0	C	T	0.618866	1	71.9179	2.2e-17	-0.0204588	0.00230573	78.731	7.1e-19	78.5756	7.7e-19
rs55676755	15	78898932	0	C	G	0.669576	0.999834	102.722	3.9e-24	-0.0252169	0.00237981	112.279	3.1e-26	112.207	3.2e-26
rs56077333	15	78899003	0	C	A	0.676049	0.994193	95.7402	1.3e-22	-0.0247658	0.00239859	106.609	5.4e-25	106.524	5.7e-25
rs7183604	15	78899213	0	T	C	0.228536	0.999406	68.2034	1.5e-16	-0.0219595	0.00266536	67.879	1.7e-16	67.4589	2.2e-16
rs11637630	15	78899719	0	G	A	0.228531	0.999518	68.3958	1.3e-16	-0.0219885	0.00266515	68.0686	1.6e-16	67.6503	2e-16
rs112878080	15	78900647	0	A	G	0.670508	0.99739	103.841	2.2e-24	-0.025402	0.00238432	113.503	1.7e-26	113.449	1.7e-26
rs138544659	15	78900701	0	T	G	0.669875	0.998711	102.865	3.6e-24	-0.0252613	0.00238159	112.507	2.8e-26	112.453	2.8e-26
rs113931022	15	78901113	0	C	T	0.669495	0.999576	102.089	5.3e-24	-0.0251666	0.00237992	111.822	3.9e-26	111.762	4e-26
rs146009840	15	78906177	0	A	T	0.669917	0.999527	101.729	6.4e-24	-0.0250772	0.00238068	110.957	6e-26	110.896	6.2e-26
rs7177514	15	78907406	0	C	G	0.771451	0.999901	66.1696	4.1e-16	0.021635	0.00266431	65.9397	4.6e-16	65.4994	5.8e-16
rs6495308	15	78907656	0	T	C	0.771402	1	65.9386	4.7e-16	0.0215939	0.002664	65.7044	5.2e-16	65.2701	6.5e-16
rs12443170	15	78907736	0	G	A	0.86857	0.98342	40.5553	1.9e-10	0.019765	0.00332838	35.2637	2.9e-09	35.1612	3e-09
rs8042059	15	78907859	0	A	C	0.771408	0.999889	66.3744	3.7e-16	0.0216667	0.00266414	66.1414	4.2e-16	65.7001	5.3e-16
rs8042494	15	78908010	0	C	T	0.771497	0.999695	65.9938	4.5e-16	0.0216255	0.0026647	65.8621	4.8e-16	65.4319	6e-16
rs8042374	15	78908032	0	A	G	0.771409	0.999877	66.3824	3.7e-16	0.0216679	0.00266415	66.1476	4.2e-16	65.7063	5.2e-16
rs8043009	15	78908154	0	G	C	0.771311	0.999735	66.3277	3.8e-16	0.0216423	0.00266395	66.0015	4.5e-16	65.565	5.6e-16
rs28681284	15	78908565	0	C	T	0.781949	0.99548	52.6296	4e-13	0.0199447	0.002712	54.0846	1.9e-13	53.7913	2.2e-13
rs4887069	15	78909070	0	A	G	0.766709	0.994305	58.9367	1.6e-14	0.0204805	0.0026526	59.6124	1.2e-14	59.1351	1.5e-14
rs3825845	15	78910258	0	C	T	0.776133	0.999113	65.7824	5e-16	0.0219538	0.00268508	66.8505	2.9e-16	66.3606	3.8e-16
rs28669908	15	78910267	0	C	A	0.786558	0.995148	52.9205	3.5e-13	0.0203537	0.00273415	55.4166	9.8e-14	55.0633	1.2e-13
rs8040868	15	78911181	0	T	C	0.607777	1	79.2373	5.5e-19	-0.0214834	0.00229421	87.6884	7.7e-21	87.2147	9.7e-21
rs4243084	15	78911672	0	G	C	0.664722	1	100.219	1.4e-23	-0.0249389	0.00237096	110.638	7.1e-26	110.481	7.7e-26
rs7170068	15	78912943	0	G	A	0.782646	0.99856	67.4436	2.2e-16	0.02235	0.00271426	67.8033	1.8e-16	67.4192	2.2e-16
rs13329271	15	78914230	0	A	C	0.782225	0.995674	65.5862	5.6e-16	0.0220752	0.00271478	66.1209	4.2e-16	65.7505	5.1e-16
rs8039449	15	78914534	0	C	T	0.637386	0.994754	91.2206	1.3e-21	-0.0235985	0.00233338	102.282	4.8e-24	102.117	5.2e-24
rs6495309	15	78915245	0	C	T	0.782819	0.993782	66.5148	3.5e-16	0.0223502	0.00272012	67.5132	2.1e-16	67.1244	2.5e-16
rs10851907	15	78915864	0	G	A	0.5898	0.99056	68.0801	1.6e-16	-0.0200375	0.00228586	76.8401	1.9e-18	76.5148	2.2e-18
rs55958997	15	78915872	0	C	A	0.638954	0.990824	88.4723	5.2e-21	-0.0233096	0.00234034	99.2002	2.3e-23	99.031	2.5e-23
rs4344703	15	78918726	0	G	T	0.316385	0.759682	61.4192	4.6e-15	0.022607	0.00276618	66.7921	3e-16	66.6068	3.3e-16
rs12593950	15	78920935	0	G	C	0.774065	0.989799	59.9991	9.5e-15	0.0209807	0.0026859	61.0185	5.7e-15	60.62	6.9e-15
rs2869548	15	78922638	0	G	A	0.651968	0.992609	90.4839	1.9e-21	-0.0237357	0.00235735	101.381	7.6e-24	101.178	8.4e-24
rs28534575	15	78923845	0	T	G	0.774415	0.988781	61.4255	4.6e-15	0.0212495	0.00268851	62.4708	2.7e-15	62.0492	3.3e-15
rs17487223	15	78923987	0	C	T	0.651588	0.992285	89.5675	3e-21	-0.0236415	0.00235678	100.627	1.1e-23	100.42	1.2e-23
rs4887072	15	78925435	0	A	G	0.774199	0.988271	61.455	4.5e-15	0.0212656	0.00268817	62.581	2.6e-15	62.1575	3.2e-15
rs72743158	15	78926445	0	T	C	0.64299	0.987895	83.4535	6.5e-20	-0.0225883	0.0023489	92.4776	6.8e-22	92.3865	7.1e-22
rs12440014	15	78926726	0	C	G	0.762222	0.983305	60.9055	6e-15	0.0205865	0.00264577	60.5424	7.2e-15	60.0777	9.1e-15
rs12441088	15	78928264	0	G	T	0.24352	0.972601	37.2773	1e-09	-0.0175489	0.00264163	44.1325	3.1e-11	43.597	4e-11
rs67175876	15	78928399	0	G	A	0.196045	0.991584	37.5388	9e-10	-0.0182014	0.00282685	41.4576	1.2e-10	41.0987	1.4e-10
rs11636605	15	78928878	0	A	G	0.193868	0.995101	35.945	2e-09	-0.0179704	0.0028361	40.149	2.4e-10	39.7767	2.8e-10
rs12441998	15	78929372	0	G	A	0.196109	0.996943	37.3425	9.9e-10	-0.0180955	0.00282093	41.1489	1.4e-10	40.8235	1.7e-10
rs11072768	15	78929478	0	T	G	0.193845	0.997593	36.0004	2e-09	-0.017963	0.00283324	40.1968	2.3e-10	39.8305	2.8e-10
rs1316971	15	78930510	0	A	G	0.19338	1	34.7313	3.8e-09	-0.0176565	0.00283352	38.829	4.6e-10	38.489	5.5e-10
rs9920506	15	78931057	0	A	G	0.153705	0.979781	32.9563	9.4e-09	-0.0179223	0.00312945	32.7983	1e-08	32.5998	1.1e-08
rs67426328	15	78934318	0	C	G	0.609395	0.984164	62.2053	3.1e-15	-0.0195965	0.00231054	71.9331	2.2e-17	71.7751	2.4e-17
rs3813567	15	78934551	0	G	A	0.197024	0.991068	32.3428	1.3e-08	-0.0173427	0.00282256	37.7524	8e-10	37.2904	1e-09
rs55988292	15	78936168	0	A	G	0.609166	0.983715	62.0692	3.3e-15	-0.0195833	0.00231053	71.8375	2.3e-17	71.6729	2.5e-17
rs11633178	15	78944538	0	A	G	0.591379	0.992653	30.3377	3.6e-08	-0.0132915	0.00228591	33.809	6.1e-09	33.7749	6.2e-09
rs11634351	15	78944718	0	G	A	0.591509	0.992945	30.9141	2.7e-08	-0.0134137	0.00228599	34.4312	4.4e-09	34.4011	4.5e-09
rs2170311	15	78947611	0	G	A	0.591463	0.994665	28.8653	7.8e-08	-0.0126875	0.00228465	30.84	2.8e-08	30.7737	2.9e-08
rs11638830	15	78948319	0	G	C	0.591566	0.996928	28.3512	1e-07	-0.0125827	0.00228259	30.3873	3.5e-08	30.3168	3.7e-08
rs12899135	15	78954379	0	A	G	0.591455	0.998575	28.2572	1.1e-07	-0.0125399	0.00228077	30.2289	3.8e-08	30.1588	4e-08
rs17514846	15	91416550	0	C	A	0.529781	0.98454	35.3514	2.8e-09	-0.0139434	0.00225931	38.0876	6.8e-10	37.9959	7.1e-10
rs8027450	15	91418394	0	C	T	0.676839	0.989899	19.2416	1.2e-05	-0.0131634	0.00240117	30.0534	4.2e-08	29.9354	4.5e-08
rs8039305	15	91422543	0	T	C	0.524305	0.992178	33.8008	6.1e-09	-0.0136829	0.00224874	37.0234	1.2e-09	36.8796	1.3e-09
rs6224	15	91423543	0	G	T	0.526657	0.993064	34.4595	4.4e-09	-0.0138378	0.00224852	37.8742	7.5e-10	37.7386	8.1e-10
rs2071382	15	91428197	0	T	C	0.473566	0.993555	32.7137	1.1e-08	0.013465	0.00224639	35.929	2e-09	35.7587	2.2e-09
rs11539637	15	91428290	0	C	T	0.474176	0.993357	32.1151	1.5e-08	0.0133664	0.00224671	35.3946	2.7e-09	35.2364	2.9e-09
rs7183988	15	91428589	0	T	G	0.473955	0.993118	33.0668	8.9e-09	0.0135565	0.00224687	36.403	1.6e-09	36.244	1.7e-09
rs7177338	15	91428636	0	G	A	0.474236	0.993009	33.1292	8.6e-09	0.0135684	0.00224681	36.469	1.6e-09	36.3185	1.7e-09
rs1894401	15	91429042	0	G	A	0.474142	0.993724	32.507	1.2e-08	0.0134578	0.00224644	35.8887	2.1e-09	35.7284	2.3e-09
rs2521501	15	91437388	0	A	T	0.677966	0.983024	22.2658	2.4e-06	-0.0138327	0.00241241	32.8786	9.8e-09	32.6563	1.1e-08
rs147711004	19	45337918	0	G	A	0.963411	0.95142	41.6808	1.1e-10	-0.0413066	0.00609613	45.9123	1.2e-11	45.7206	1.4e-11
rs41289512	19	45351516	0	C	G	0.957354	1	40.5025	2e-10	-0.037567	0.00552861	46.1724	1.1e-11	46.0441	1.2e-11
rs146275714	19	45365447	0	G	A	0.978537	0.879186	25.4011	4.7e-07	-0.0450862	0.00821783	30.1004	4.1e-08	29.7943	4.8e-08
rs6859	19	45382034	0	A	G	0.422357	1	46.6419	8.5e-12	0.016485	0.00226314	53.0584	3.2e-13	53.0389	3.3e-13
rs406456	19	45382717	0	G	A	0.388982	0.987271	21.5876	3.4e-06	0.0132523	0.0023086	32.9522	9.4e-09	32.6827	1.1e-08
rs406315	19	45384116	0	G	A	0.370669	0.982235	20.7375	5.3e-06	0.0130392	0.00233587	31.1604	2.4e-08	30.8999	2.7e-08
rs12972156	19	45387459	0	C	G	0.851484	0.984489	197.954	5.8e-45	-0.045238	0.0031703	203.613	3.4e-46	203.778	3.1e-46
rs12972970	19	45387596	0	G	A	0.851392	0.985246	198.462	4.5e-45	-0.0452684	0.00316838	204.134	2.6e-46	204.308	2.4e-46
rs34342646	19	45388130	0	G	A	0.848113	0.985712	185.986	2.4e-42	-0.0434278	0.00313962	191.329	1.6e-43	191.464	1.5e-43
rs283815	19	45390333	0	A	G	0.784638	0.994152	124.119	7.9e-29	-0.03282	0.00273002	144.526	2.7e-33	144.098	3.4e-33
rs6857	19	45392254	0	C	T	0.828791	0.99456	240.149	3.6e-54	-0.0469002	0.00297737	248.133	6.6e-56	247.686	8.3e-56
rs71352238	19	45394336	0	T	C	0.850887	0.997353	191.838	1.3e-43	-0.0440761	0.00314693	196.17	1.4e-44	196.344	1.3e-44
rs184017	19	45394969	0	T	G	0.784742	0.998021	122.056	2.2e-28	-0.032491	0.00272537	142.127	9.1e-33	141.741	1.1e-32
rs157580	19	45395266	0	G	A	0.394509	1	16.7835	4.2e-05	-0.0140036	0.00228627	37.5165	9.1e-10	37.3937	9.7e-10
rs2075650	19	45395619	0	A	G	0.853816	1	201.127	1.2e-45	-0.0454613	0.00316891	205.808	1.1e-46	206.021	1e-46
rs157581	19	45395714	0	T	C	0.784024	1	124.591	6.3e-29	-0.0327071	0.00272088	144.499	2.8e-33	144.101	3.4e-33
rs34095326	19	45395844	0	G	A	0.886195	0.990754	145.673	1.5e-33	-0.0434715	0.00353875	150.907	1.1e-34	150.694	1.2e-34
rs34404554	19	45395909	0	C	G	0.853858	0.999309	202.303	6.6e-46	-0.0455743	0.00316996	206.697	7.2e-47	206.908	6.5e-47
rs11556505	19	45396144	0	C	T	0.853839	0.999103	201.098	1.2e-45	-0.0454568	0.00317016	205.606	1.2e-46	205.81	1.1e-46
rs157582	19	45396219	0	C	T	0.785016	0.99852	127.762	1.3e-29	-0.0331615	0.00272683	147.894	5e-34	147.495	6.1e-34
rs59007384	19	45396665	0	G	T	0.793524	0.992556	133.009	9e-31	-0.034278	0.00277346	152.752	4.3e-35	152.277	5.5e-35
rs115881343	19	45403216	0	C	T	0.97221	0.992344	32.1128	1.5e-08	-0.0402242	0.00683096	34.6745	3.9e-09	34.112	5.2e-09
rs1160985	19	45403412	0	C	T	0.568392	1	70.1914	5.4e-17	0.0145378	0.00225779	41.4598	1.2e-10	41.4442	1.2e-10
rs760136	19	45403858	0	A	G	0.568396	0.999451	70.8092	3.9e-17	0.0146298	0.00225838	41.9645	9.3e-11	41.9497	9.4e-11
rs741780	19	45404431	0	T	C	0.568379	0.998859	71.0009	3.6e-17	0.0146563	0.00225895	42.0957	8.7e-11	42.0825	8.8e-11
rs112019714	19	45404857	0	T	C	0.972172	0.991889	31.4756	2e-08	-0.0398059	0.00682817	33.985	5.6e-09	33.429	7.4e-09
rs1038025	19	45404972	0	T	C	0.568319	0.998431	71.0893	3.4e-17	0.0146635	0.00225933	42.1228	8.6e-11	42.111	8.6e-11
rs1038026	19	45405062	0	A	G	0.568291	0.998184	71.2119	3.2e-17	0.0146794	0.00225957	42.2054	8.2e-11	42.1921	8.3e-11
rs10119	19	45406673	0	G	A	0.709364	0.980499	122.072	2.2e-28	-0.025925	0.0024864	108.716	1.9e-25	108.265	2.4e-25
rs7259620	19	45407788	0	G	A	0.569142	0.995548	73.322	1.1e-17	0.0149831	0.0022617	43.8867	3.5e-11	43.8665	3.5e-11
rs405509	19	45408836	0	T	G	0.488663	1	75.568	3.5e-18	0.0156662	0.00223949	48.9363	2.6e-12	49.1688	2.3e-12
rs769449	19	45410002	0	G	A	0.873885	1	265.561	1.1e-59	-0.055011	0.00337015	266.44	6.8e-60	266.866	5.5e-60
rs429358	19	45411941	0	T	C	0.844963	1	329.978	9.7e-74	-0.056563	0.00309374	334.268	1.1e-74	333.787	1.4e-74
rs7412	19	45412079	0	C	T	0.919469	1	65.0212	7.4e-16	0.0316243	0.00411405	59.0885	1.5e-14	59.0795	1.5e-14
rs1081105	19	45412955	0	A	C	0.972355	0.994969	38.6116	5.2e-10	-0.0437713	0.00683937	40.9587	1.6e-10	40.3206	2.2e-10
rs75627662	19	45413576	0	C	T	0.793798	0.99675	65.3026	6.4e-16	-0.0231152	0.00276734	69.7702	6.7e-17	69.9072	6.2e-17
rs439401	19	45414451	0	T	C	0.361616	1	23.9304	1e-06	-0.0136383	0.00232979	34.268	4.8e-09	34.2075	5e-09
rs10414043	19	45415713	0	G	A	0.87247	0.99157	265.66	1e-59	-0.0549042	0.00336399	266.38	7e-60	266.758	5.8e-60
rs7256200	19	45415935	0	G	T	0.872352	0.991249	266.544	6.4e-60	-0.054972	0.00336301	267.194	4.6e-60	267.578	3.8e-60
rs483082	19	45416178	0	G	T	0.763634	0.993498	103.385	2.8e-24	-0.0277412	0.00263842	110.551	7.4e-26	110.302	8.4e-26
rs584007	19	45416478	0	A	G	0.358739	0.993829	21.4458	3.6e-06	-0.0131042	0.00234059	31.345	2.2e-08	31.3078	2.2e-08
rs438811	19	45416741	0	C	T	0.763575	0.993213	102.822	3.7e-24	-0.0276921	0.00263847	110.156	9.1e-26	109.907	1e-25
rs12691088	19	45418486	0	G	A	0.978872	0.864243	38.9113	4.4e-10	-0.0555909	0.00835227	44.2994	2.8e-11	44.1331	3.1e-11
rs5117	19	45418790	0	T	C	0.764522	0.991319	102.323	4.7e-24	-0.027704	0.002645	109.706	1.1e-25	109.472	1.3e-25
rs150966173	19	45421204	0	C	T	0.972048	0.986493	37.3177	1e-09	-0.0427049	0.00682618	39.1382	3.9e-10	38.5836	5.2e-10
rs12721046	19	45421254	0	G	A	0.842074	0.992638	213.66	2.2e-48	-0.0450418	0.0030758	214.444	1.5e-48	215.105	1.1e-48
rs12721051	19	45422160	0	C	G	0.810645	0.996947	264.604	1.7e-59	-0.0469942	0.00285846	270.286	9.8e-61	270.365	9.4e-61
rs56131196	19	45422846	0	G	A	0.810446	0.999105	264.257	2e-59	-0.0469277	0.0028553	270.119	1.1e-60	270.206	1e-60
rs4420638	19	45422946	0	A	G	0.810211	1	261.201	9.4e-59	-0.046629	0.00285332	267.061	5e-60	267.138	4.8e-60
rs157595	19	45425460	0	A	G	0.38311	0.950904	31.1556	2.4e-08	-0.0160735	0.00235705	46.5031	9.1e-12	46.5336	9e-12
rs141622900	19	45426792	0	G	A	0.947508	0.945698	57.133	4.1e-14	0.0332721	0.00513808	41.9332	9.4e-11	41.9173	9.5e-11
rs111789331	19	45427125	0	T	A	0.840784	0.953847	219.929	9.4e-50	-0.0463867	0.00312512	220.32	7.7e-50	220.899	5.8e-50
rs66626994	19	45428234	0	G	A	0.841142	0.941536	215.405	9.1e-49	-0.0462244	0.00314589	215.902	7.1e-49	216.493	5.3e-49
rs60049679	19	45429708	0	G	C	0.926874	0.865801	45.9733	1.2e-11	-0.03041	0.00458566	43.9774	3.3e-11	43.9435	3.4e-11
