# Supplementary material for: Human longevity: 25 genetic loci associated in 389,166 UK biobank participants
Source: Aging (Albany NY). 2017 Dec 6;9(12):2504–20. doi: 10.18632/aging.101334 (PMC5764389; doi:10.18632/aging.101334)
Supplement: Supplementary file 3 [file aging-09-2504-s003.xlsx]

## Sheet: Sheet1
Specific a priori SNPs associated with longevity or related phenotypes and their associations from the GWAS of parental-age-at-death longevity traits in UK Biobank
	BP = Genomic position, build 37 (hg19), A1F = A1 frequency, P = BOLT LMM p-value, SE = Standard Error
	Beta = A1 effect on outcome. For attained age (Martingale residuals) a negative BETA = reduced hazard, i.e. increased attained age
								MARTINGALE RESIDUALS															MARTINGALE RESIDUALS
								Parents attained age			Parents age at death			Both top 10% survival			Father's age at death			Mother's age at death			Father's age at death			Mother's age at death
SNP	CHR	BP_b37	ALLELE1	ALLELE0	A1FREQ	gene	link	BETA	SE	P	BETA	SE	P	BETA	SE	P	BETA	SE	P	BETA	SE	P	BETA	SE	P	BETA	SE	P
rs2802292	6	108908518	G	T	0.372192	FOXO3A	Broer 2014. EU_longevity, cases: 90+, controls <65.	-0.00265965	0.00168816	0.11	-0.00206054	0.0033835	0.54	-0.00106663	0.00204296	0.59	0.00171895	0.00274161	0.54	0.00125614	0.00285738	0.65	-0.00507022	0.00195638	0.0093	-0.000994066	0.00174813	0.57
rs10457180	6	108965039	G	A	0.294494	FOXO3A	Broer 2014. EU_longevity, cases: 90+, controls <65.	-0.00295912	0.00179067	0.099	-0.00136918	0.00358539	0.69	-0.00160675	0.00216612	0.44	-0.000324939	0.00290802	0.87	0.00404533	0.00302882	0.19	-0.00347951	0.00207582	0.096	-0.00302056	0.00185413	0.11
rs13217795	6	108974098	C	T	0.292986	FOXO3A	Soerensen, 2010.	-0.002849	0.00179368	0.11	-0.00166441	0.00359207	0.63	-0.00149487	0.00216965	0.47	-0.000565361	0.00291296	0.81	0.00386435	0.00303459	0.21	-0.00338514	0.00207924	0.11	-0.00305092	0.00185718	0.1
rs2764264	6	108934461	C	T	0.304374	FOXO3A	Soerensen, 2010.	-0.00234842	0.00177795	0.19	-0.00217221	0.00356062	0.53	-0.00179851	0.00215165	0.38	-0.00046992	0.0028877	0.83	0.00307642	0.00300676	0.31	-0.00314054	0.00206132	0.13	-0.0024514	0.00184098	0.19
rs479744	6	109020032	G	T	0.793049	FOXO3A	Soerensen, 2010.	0.00313232	0.00206425	0.13	-0.00291761	0.0041303	0.49	0.00103478	0.00249873	0.66	0.000346332	0.00335417	0.88	-0.00506128	0.0034894	0.15	0.00289185	0.00239381	0.23	0.00269544	0.00213675	0.21
rs9400239	6	108977663	T	C	0.294163	FOXO3A	Soerensen, 2010.	-0.00296767	0.00179165	0.098	-0.00151128	0.00358773	0.66	-0.0014845	0.00216753	0.48	-0.000333845	0.00290972	0.87	0.00386202	0.00303067	0.21	-0.00361758	0.00207696	0.084	-0.00298913	0.00185514	0.11
rs12206094	6	108906200	C	T	0.720585	FOXO3A	Soerensen, 2010.	0.00304487	0.0018185	0.097	0.00263248	0.00364339	0.47	0.00222291	0.00219762	0.3	-0.0016474	0.00295245	0.61	-0.000776195	0.00308037	0.8	0.00645759	0.0021083	0.0023	0.00113642	0.00188342	0.56
rs13220810	6	108913201	T	C	0.74759	FOXO3A	Soerensen, 2010.	-0.00057712	0.00189635	0.75	-0.0089642	0.00379973	0.019	-0.00359784	0.002305	0.11	-0.00547987	0.00307711	0.073	-0.000996417	0.00321414	0.76	-0.00188294	0.00219764	0.38	-0.000323166	0.00196509	0.87
rs7762395	6	108945107	G	A	0.843613	FOXO3A	Soerensen, 2010.	0.00319917	0.00225121	0.16	-0.00150112	0.0045061	0.73	-0.00110133	0.00271542	0.71	-0.00111057	0.00365512	0.79	-0.00401855	0.00380935	0.29	0.00406517	0.00261079	0.12	0.00179206	0.00233127	0.45
rs9486902	6	108878052	C	T	0.837339	FOXO3A	Soerensen, 2010.	0.0024937	0.00221324	0.26	-0.00102051	0.00443056	0.81	0.000231333	0.0026728	0.92	0.000193039	0.00359277	0.93	-0.00366743	0.00374544	0.33	0.00348217	0.00256638	0.18	0.00127668	0.0022918	0.59
rs1935949	6	108999287	A	G	0.285618	FOXO3A	Bao, 2014.	-0.00360042	0.00181617	0.048	0.000868454	0.00363675	0.83	-0.000996875	0.00219579	0.63	0.000909606	0.00294955	0.79	0.00401813	0.00307146	0.2	-0.00453927	0.00210525	0.032	-0.00263675	0.00188045	0.17
rs2721069	13	41143720	C	T	0.694393	FOXO1A	FOXO longevity patent 2015	0.000334968	0.00176725	0.85	0.000945323	0.00355137	0.8	0.000380463	0.00215258	0.79	-0.00050571	0.00287204	0.89	0.00385106	0.00299771	0.19	0.00232204	0.00204844	0.25	-0.000766708	0.00183029	0.68
rs2075650	19	45395619	A	G	0.85122	APOE	Broer 2014. EU_longevity, cases: 90+, controls <65.	-0.0349178	0.00231112	1.1e-51	0.0366171	0.00460523	2.6e-15	0.0320505	0.00278606	1.7e-30	0.021553	0.0037451	1.1e-08	0.0272991	0.00388757	1.9e-12	-0.0296845	0.00267901	1.5e-28	-0.0345499	0.00239336	2.7e-47
rs429358	19	45411941	T	C	0.842077	APOE	Deelen 2011. Part of E4 definition	-0.0431606	0.00225635	1.6e-81	0.0435613	0.00449074	5e-22	0.0387531	0.0027213	7.1e-46	0.026218	0.00365461	8.5e-13	0.0336192	0.00379418	6.7e-19	-0.0348352	0.00261475	1.8e-40	-0.0440461	0.00233639	2.6e-79
rs7412	19	45412079	C	T	0.920067	APOE	Part of E4 definition	0.0251218	0.0030004	5.7e-17	-0.0308353	0.00603186	3.8e-07	-0.0186874	0.00365694	2.6e-07	-0.0215479	0.0048755	1.1e-05	-0.010691	0.00510815	0.038	0.0276634	0.00347836	2.1e-15	0.018156	0.00310801	5e-09
rs405509	19	45408836	T	G	0.491032	APOE	Soerensen 2013	0.0129445	0.00163327	2e-15	-0.0143002	0.00327117	1.3e-05	-0.0117943	0.00198319	2.4e-09	-0.00883859	0.00264989	0.0009	-0.00897369	0.00276479	0.0011	0.0118915	0.00189213	3e-10	0.0119915	0.00169136	1.2e-12
rs4420638	19	45422946	A	G	0.807923	APOE	Bertram 2007. Coinherited with APOE E4, exacerbates AD phenotype	-0.0356662	0.00208099	6.6e-66	0.0382276	0.00415542	4.9e-20	0.0334729	0.00251035	2.6e-40	0.0232342	0.00337414	6.6e-12	0.0287514	0.00350993	2.2e-16	-0.0288533	0.00241166	5.4e-33	-0.0353919	0.00215492	1.4e-60
rs10737670	1	196357746	A	G	0.687943	KCNT2	Fortney 2015. 90+ survival	-0.00343743	0.00241687	0.16	0.001223	0.00353412	0.71	0.00194064	0.00213885	0.38	0.00158608	0.00286171	0.57	0.00234985	0.0029903	0.44	-0.00201268	0.00204293	0.32	-0.00152769	0.00182686	0.39
rs12194148	6	32444198	G	T	0.526118	HLA	Fortney 2015. 90+ survival	-0.00122585	0.00223938	0.58	0.00770613	0.00327563	0.019	0.0020773	0.00197383	0.28	0.00495931	0.00264947	0.062	0.00616177	0.00276943	0.026	-0.0018376	0.00189255	0.34	-0.00171433	0.00169151	0.31
rs10455872	6	161010118	A	G	0.919628	LPA	Fortney 2015. 90+ survival	-0.0360743	0.00413455	2.1e-18	0.0395591	0.00602745	6.7e-11	0.0201722	0.00362746	2.2e-08	0.0246912	0.00489358	4.8e-07	0.0264696	0.00508758	2.1e-07	-0.0270655	0.00349205	6.7e-15	-0.0194413	0.00312236	4.6e-10
rs514659	9	136142203	A	C	0.686696	ABO	Fortney 2015. 90+ survival	-0.00591273	0.00239692	0.015	0.0139541	0.00350688	8.8e-05	-0.000949183	0.00211824	0.6	0.0079795	0.00283759	0.005	0.00565507	0.00296314	0.057	-0.00281658	0.00202601	0.17	-0.00432717	0.0018105	0.017
rs174555	11	61579760	T	C	0.688184	FADS1	Fortney 2015. 90+ survival	0.00260141	0.00241914	0.27	-0.00366638	0.00353192	0.3	-0.00228297	0.00212996	0.28	-0.00367307	0.00286106	0.2	-0.000652375	0.00298608	0.82	0.00276705	0.002045	0.17	-0.000197152	0.00182736	0.95
rs3763305	6	32369488	G	A	0.948983	HLA	Fortney 2015. NECS	-0.00297627	0.0050584	0.58	0.0147114	0.00741815	0.05	0.00674125	0.00448118	0.15	0.00616752	0.00599552	0.31	0.00676294	0.00627261	0.27	-0.00346228	0.0042768	0.42	0.00176067	0.00382366	0.63
rs3184504	12	111884608	T	C	0.483469	SH2B3/ATXN2	Fortney 2015. NECS	0.0168477	0.00223856	5.3e-14	-0.0179405	0.00326515	4e-08	-0.00915548	0.00197307	3.9e-06	-0.0145296	0.0026449	4e-08	-0.0109235	0.00276179	7.5e-05	0.0134372	0.00189167	1.2e-12	0.00867142	0.00169046	2.6e-07
rs1051730	15	78894339	G	A	0.668856	CHRNA3	Furberg 2010. Association with number of cigarettes smoked	-0.0168544	0.00173546	2.7e-22	0.0232196	0.00347953	2.3e-11	0.0124928	0.00210122	2.8e-09	0.0207884	0.00281667	2e-13	0.00800292	0.0029398	0.0066	-0.021877	0.00201047	1.3e-27	-0.00798887	0.00179721	9e-06
rs1329650	10	93348120	G	T	0.732997	LOC100188947	Furberg 2010. Association with number of cigarettes smoked	0.000803038	0.0018434	0.66	0.00202865	0.00370134	0.58	0.00279168	0.00224174	0.22	0.00292402	0.00299282	0.34	-0.00148941	0.00312459	0.65	-0.00154846	0.00213555	0.47	0.00257456	0.0019088	0.18
rs3733829	19	41310571	A	G	0.640369	EGLN2, near CYP2A6	Furberg 2010. Association with number of cigarettes smoked	0.000936328	0.00169904	0.59	-0.00183933	0.00340572	0.57	-0.00118948	0.00206179	0.59	0.000323806	0.00275817	0.93	0.000308491	0.00287922	0.9	-0.000242141	0.00196822	0.88	0.000316865	0.00175991	0.85
rs11933661	4	131013140	C	T	0.548223	intergenic	Quillen 2013. Alcohol dependence. Effect=unit decrease	-0.000304337	0.00163954	0.85	-0.00530386	0.00328841	0.11	-0.00120489	0.00199234	0.6	-0.00558026	0.00266184	0.038	-0.00135985	0.00277949	0.61	0.00311187	0.0019	0.11	-0.00208381	0.00169839	0.22
rs4478858	1	31883925	T	C	0.571965	SERINC2	Zuo 2013. Alcohol dependence	-0.00346258	0.00165094	0.033	0.00332648	0.00331078	0.3	0.000122761	0.00200322	0.9	0.00658922	0.00268139	0.013	0.000598787	0.00280006	0.81	-0.00501904	0.0019136	0.0082	-0.00151462	0.00171061	0.36
rs2149954	5	157820602	C	T	0.640635	lncRNA 5q33.3	Deelen 2014. Survival 90+ (controls <65 years)	0.00509502	0.00169937	0.003	-0.00372391	0.00340967	0.28	-0.000328632	0.00206525	0.89	-0.0030922	0.00275629	0.28	-0.0030815	0.00288251	0.27	0.00289542	0.00196874	0.15	0.0045167	0.00176026	0.01
rs6025	1	169519049	T	C	0.0226779	F5	Leiden F5. Deep vein thrombosis	-0.0027414	0.00545517	0.59	0.0128032	0.0109868	0.23	0.0062961	0.00675798	0.33	0.00554862	0.00886219	0.53	0.0127844	0.00929665	0.16	-0.00105836	0.00631694	0.85	-0.00290407	0.005654	0.59
rs3731217	9	21984661	A	C	0.852792	9p21 (CDKN2A/B, ANRIL)	Migliorini 2014. Acute lymphoblastic leukemia	0.00141033	0.00316559	0.66	-0.00654596	0.00462023	0.16	0.0011599	0.00280257	0.74	-0.00253166	0.00374461	0.5	-0.00532853	0.00390623	0.17	0.00116641	0.00267418	0.68	-1.53817e-05	0.00239156	1
rs3731211	9	21986847	T	A	0.278228	9p21 (CDKN2A/B, ANRIL)	Gieger C 2015. Platelet count	0.00221858	0.00249639	0.36	0.00316436	0.0036495	0.4	0.000855732	0.00220981	0.65	0.00208658	0.00295536	0.48	0.00256422	0.00308126	0.41	0.000200173	0.00210956	0.92	0.000755657	0.0018859	0.69
rs3731211	9	21986847	T	A	0.278228	9p21 (CDKN2A/B, ANRIL)	Astle et al. 2016 Cell. . Platelet [PCT] Plateletcrit	0.00221858	0.00249639	0.36	0.00316436	0.0036495	0.4	0.000855732	0.00220981	0.65	0.00208658	0.00295536	0.48	0.00256422	0.00308126	0.41	0.000200173	0.00210956	0.92	0.000755657	0.0018859	0.69
rs3731211	9	21986847	T	A	0.278228	9p21 (CDKN2A/B, ANRIL)	Astle et al. 2016 Cell. . Compound white cell [WBC#] White blood cell count	0.00221858	0.00249639	0.36	0.00316436	0.0036495	0.4	0.000855732	0.00220981	0.65	0.00208658	0.00295536	0.48	0.00256422	0.00308126	0.41	0.000200173	0.00210956	0.92	0.000755657	0.0018859	0.69
rs3731211	9	21986847	T	A	0.278228	9p21 (CDKN2A/B, ANRIL)	Astle et al. 2016 Cell. . Platelet [PLT#] Platelet count	0.00221858	0.00249639	0.36	0.00316436	0.0036495	0.4	0.000855732	0.00220981	0.65	0.00208658	0.00295536	0.48	0.00256422	0.00308126	0.41	0.000200173	0.00210956	0.92	0.000755657	0.0018859	0.69
rs3731211	9	21986847	T	A	0.278228	9p21 (CDKN2A/B, ANRIL)	Astle et al. 2016 Cell. . Myeloid white cell [MONO#] Monocyte count	0.00221858	0.00249639	0.36	0.00316436	0.0036495	0.4	0.000855732	0.00220981	0.65	0.00208658	0.00295536	0.48	0.00256422	0.00308126	0.41	0.000200173	0.00210956	0.92	0.000755657	0.0018859	0.69
rs3731211	9	21986847	T	A	0.278228	9p21 (CDKN2A/B, ANRIL)	Astle et al. 2016 Cell. . Lymphoid white cell [LYMPH#] Lymphocyte count	0.00221858	0.00249639	0.36	0.00316436	0.0036495	0.4	0.000855732	0.00220981	0.65	0.00208658	0.00295536	0.48	0.00256422	0.00308126	0.41	0.000200173	0.00210956	0.92	0.000755657	0.0018859	0.69
rs2811710	9	21991923	C	T	0.62979	9p21 (CDKN2A/B, ANRIL)	Mitchell 2017. Multiple myeloma	0.000210729	0.00232768	0.94	-0.00301201	0.00340268	0.39	-0.000880146	0.00205979	0.65	-0.00196814	0.00275434	0.48	-0.00233273	0.00287632	0.42	0.00149128	0.00196641	0.45	-0.000574811	0.00175877	0.75
rs1063192	9	22003367	G	A	0.443296	9p21 (CDKN2A/B, ANRIL)	Osman W 2012. Glaucoma (primary open-angle)	-0.0098031	0.00225135	1.1e-05	0.0107135	0.00329	0.0011	0.00557678	0.00199081	0.0047	0.00783804	0.00266534	0.0029	0.0073592	0.00277974	0.0083	-0.00594878	0.00190298	0.0017	-0.00507456	0.00170044	0.0027
rs1063192	9	22003367	G	A	0.443296	9p21 (CDKN2A/B, ANRIL)	Ramdas WD 2010. Vertical cup-disc ratio	-0.0098031	0.00225135	1.1e-05	0.0107135	0.00329	0.0011	0.00557678	0.00199081	0.0047	0.00783804	0.00266534	0.0029	0.0073592	0.00277974	0.0083	-0.00594878	0.00190298	0.0017	-0.00507456	0.00170044	0.0027
rs523096	9	22019129	A	G	0.554678	9p21 (CDKN2A/B, ANRIL)	Takamoto M 2012. Glaucoma	0.0102411	0.00225026	4.8e-06	-0.00927276	0.0032871	0.0047	-0.0040562	0.00198854	0.043	-0.0070449	0.00266367	0.0078	-0.0061167	0.00277789	0.028	0.00549713	0.00190199	0.0038	0.00530516	0.00169987	0.0018
rs7865618	9	22031005	G	A	0.434955	9p21 (CDKN2A/B, ANRIL)	Wild 2011. CHD & Takamoto 2012. Glaucoma	-0.0102532	0.00225591	4.6e-06	0.0120639	0.00329581	0.00024	0.00562354	0.0019957	0.0045	0.00777458	0.0026706	0.0033	0.0081554	0.00278469	0.0035	-0.00609858	0.00190695	0.0013	-0.0053224	0.00170404	0.0017
rs7865618	9	22031005	G	A	0.434955	9p21 (CDKN2A/B, ANRIL)	Wild PS 2011. Coronary heart disease	-0.0102532	0.00225591	4.6e-06	0.0120639	0.00329581	0.00024	0.00562354	0.0019957	0.0045	0.00777458	0.0026706	0.0033	0.0081554	0.00278469	0.0035	-0.00609858	0.00190695	0.0013	-0.0053224	0.00170404	0.0017
rs7865618	9	22031005	G	A	0.434955	9p21 (CDKN2A/B, ANRIL)	Nakano M 2012. Glaucoma (primary open-angle)	-0.0102532	0.00225591	4.6e-06	0.0120639	0.00329581	0.00024	0.00562354	0.0019957	0.0045	0.00777458	0.0026706	0.0033	0.0081554	0.00278469	0.0035	-0.00609858	0.00190695	0.0013	-0.0053224	0.00170404	0.0017
rs7865618	9	22031005	G	A	0.434955	9p21 (CDKN2A/B, ANRIL)	Springelkamp H 2015. Vertical cup-disc ratio	-0.0102532	0.00225591	4.6e-06	0.0120639	0.00329581	0.00024	0.00562354	0.0019957	0.0045	0.00777458	0.0026706	0.0033	0.0081554	0.00278469	0.0035	-0.00609858	0.00190695	0.0013	-0.0053224	0.00170404	0.0017
rs7865618	9	22031005	G	A	0.434955	9p21 (CDKN2A/B, ANRIL)	Springelkamp H 2015. Optic cup area	-0.0102532	0.00225591	4.6e-06	0.0120639	0.00329581	0.00024	0.00562354	0.0019957	0.0045	0.00777458	0.0026706	0.0033	0.0081554	0.00278469	0.0035	-0.00609858	0.00190695	0.0013	-0.0053224	0.00170404	0.0017
rs634537	9	22032152	T	G	0.576444	9p21 (CDKN2A/B, ANRIL)	Melin BS 2017. Glioma	0.0100571	0.00226436	7.5e-06	-0.0105883	0.00330876	0.0013	-0.00470055	0.00200259	0.018	-0.00789923	0.00268038	0.003	-0.00693007	0.00279564	0.013	0.00629437	0.00191404	0.00097	0.005125	0.00171045	0.0026
rs2157719	9	22033366	C	T	0.435533	9p21 (CDKN2A/B, ANRIL)	Sanson M 2011. Glioma	-0.0102428	0.00225297	4.6e-06	0.0127115	0.00329224	0.00011	0.00581833	0.00199307	0.0032	0.00828538	0.00266741	0.0017	0.00844713	0.00278128	0.0024	-0.00604817	0.00190452	0.0014	-0.00540108	0.00170182	0.0015
rs2157719	9	22033366	C	T	0.435533	9p21 (CDKN2A/B, ANRIL)	Wiggs JL 2012. Glaucoma (primary open-angle)	-0.0102428	0.00225297	4.6e-06	0.0127115	0.00329224	0.00011	0.00581833	0.00199307	0.0032	0.00828538	0.00266741	0.0017	0.00844713	0.00278128	0.0024	-0.00604817	0.00190452	0.0014	-0.00540108	0.00170182	0.0015
rs2157719	9	22033366	C	T	0.435533	9p21 (CDKN2A/B, ANRIL)	Kinnersley B 2016. Glioma	-0.0102428	0.00225297	4.6e-06	0.0127115	0.00329224	0.00011	0.00581833	0.00199307	0.0032	0.00828538	0.00266741	0.0017	0.00844713	0.00278128	0.0024	-0.00604817	0.00190452	0.0014	-0.00540108	0.00170182	0.0015
rs2157719	9	22033366	C	T	0.435533	9p21 (CDKN2A/B, ANRIL)	Kinnersley B 2016. Non-glioblastoma glioma	-0.0102428	0.00225297	4.6e-06	0.0127115	0.00329224	0.00011	0.00581833	0.00199307	0.0032	0.00828538	0.00266741	0.0017	0.00844713	0.00278128	0.0024	-0.00604817	0.00190452	0.0014	-0.00540108	0.00170182	0.0015
rs2157719	9	22033366	C	T	0.435533	9p21 (CDKN2A/B, ANRIL)	Springelkamp H 2017. Vertical cup-disc ratio	-0.0102428	0.00225297	4.6e-06	0.0127115	0.00329224	0.00011	0.00581833	0.00199307	0.0032	0.00828538	0.00266741	0.0017	0.00844713	0.00278128	0.0024	-0.00604817	0.00190452	0.0014	-0.00540108	0.00170182	0.0015
rs2151280	9	22034719	G	A	0.533473	9p21 (CDKN2A/B, ANRIL)	Stacey 2015. Basal cell carcinoma	-0.00754753	0.00224211	0.00073	0.0109534	0.00328339	0.00083	0.00404234	0.00198369	0.04	0.00888312	0.00265664	0.00077	0.00575873	0.00277205	0.039	-0.00602978	0.00189585	0.0014	-0.00312244	0.00169413	0.065
rs1333037	9	22040765	C	T	0.433156	9p21 (CDKN2A/B, ANRIL)	Cooke Bailey JN 2016. Glaucoma (low intraocular pressure)	-0.0103363	0.00225868	4e-06	0.0126358	0.00330012	0.00012	0.00585115	0.00199856	0.0032	0.00802218	0.00267413	0.0025	0.00817733	0.00278787	0.0034	-0.0061583	0.00190934	0.0012	-0.00540163	0.00170617	0.0015
rs17694493	9	22041998	C	G	0.864067	9p21 (CDKN2A/B, ANRIL)	Al Olama 2014. Prostate cancer	-0.00228884	0.00329173	0.46	0.00288374	0.00481629	0.54	0.00313417	0.00292033	0.28	-0.00475188	0.00389667	0.22	0.00429001	0.00406888	0.29	0.000966783	0.00278067	0.72	-0.00241597	0.00248592	0.33
rs1412829	9	22043926	A	G	0.576116	9p21 (CDKN2A/B, ANRIL)	Wrensch M 2009. Glioma (high-grade)	0.0101072	0.0022648	6.9e-06	-0.0101238	0.00330953	0.0021	-0.00453802	0.00200342	0.023	-0.00728026	0.00268105	0.0062	-0.00625697	0.00279623	0.026	0.00595261	0.00191445	0.0018	0.00524958	0.00171087	0.0021
rs1360589	9	22045317	C	T	0.42812	9p21 (CDKN2A/B, ANRIL)	Springelkamp H 2017. Optic cup area	-0.0107683	0.00226124	1.6e-06	0.0125762	0.00330457	0.00013	0.00603302	0.00200123	0.0025	0.00809986	0.00267742	0.0023	0.0079152	0.00279159	0.0047	-0.00663488	0.00191159	0.00049	-0.00525836	0.0017083	0.002
rs7874604	9	22054690	T	C	0.520898	9p21 (CDKN2A/B, ANRIL)	Chahal HS 2017. Basal cell carcinoma	-0.00739262	0.00223951	0.00093	0.0109534	0.00327951	0.00084	0.00424542	0.00198155	0.032	0.00886501	0.0026533	0.00077	0.00557003	0.00276882	0.046	-0.00643578	0.00189367	0.00064	-0.00286073	0.00169226	0.091
rs7866783	9	22056359	A	G	0.428751	9p21 (CDKN2A/B, ANRIL)	Verma SS 2017. Glaucoma (primary open-angle)	-0.010373	0.00226304	3.9e-06	0.0128793	0.00330756	9.2e-05	0.00602513	0.0020029	0.0025	0.00793011	0.00267949	0.0028	0.00857128	0.00279395	0.0022	-0.00639135	0.00191311	0.00079	-0.00522946	0.00170968	0.0021
rs1011970	9	22062134	G	T	0.829661	9p21 (CDKN2A/B, ANRIL)	Michailidou 2015 Nat Gen; PMID=25751625 . Breast Cancer	-0.000540026	0.00297656	0.83	0.00285649	0.00434602	0.48	-0.00216994	0.00263084	0.45	-0.00354699	0.00352364	0.32	0.00308463	0.00367469	0.4	0.00370398	0.00251519	0.14	-0.0016687	0.00224772	0.46
rs8181047	9	22064465	A	G	0.305401	9p21 (CDKN2A/B, ANRIL)	Lesseur C 2017. Oral cavity cancer	-0.0108775	0.00243273	6.2e-06	0.0119196	0.00355827	0.00071	0.00644338	0.00215951	0.0027	0.00623236	0.00288084	0.028	0.0081649	0.00300707	0.0063	-0.00659759	0.0020568	0.0012	-0.00582353	0.00183819	0.0014
rs4977756	9	22068652	G	A	0.403345	9p21 (CDKN2A/B, ANRIL)	Fortney 2015. 90+ survival	-0.0125732	0.00228116	2.9e-08	0.0151172	0.00333721	5.2e-06	0.00703761	0.00202574	0.00049	0.0092095	0.0027015	0.00058	0.00895513	0.00281905	0.0015	-0.00788504	0.00192835	4.1e-05	-0.00603055	0.00172331	0.00044
rs4977756	9	22068652	G	A	0.402344	9p21 (CDKN2A/B, ANRIL)	Gharahkhani P 2015. Glaucoma (primary open-angle)	-0.0125732	0.00228116	2.9e-08	0.0151172	0.00333721	5.2e-06	0.00703761	0.00202574	0.00049	0.0092095	0.0027015	0.00058	0.00895513	0.00281905	0.0015	-0.00788504	0.00192835	4.1e-05	-0.00603055	0.00172331	0.00044
rs10757269	9	22072264	A	G	0.514303	9p21 (CDKN2A/B, ANRIL)	Murabito JM 2012. Ankle-brachial index	-0.0151733	0.00224463	1.2e-11	0.0165915	0.00328455	4.4e-07	0.00918902	0.00199186	4.8e-06	0.0117513	0.00265882	9.3e-06	0.00898317	0.00277392	0.0012	-0.0120269	0.00189746	2.1e-10	-0.0054699	0.00169549	0.0012
rs6475606	9	22081850	C	T	0.5182	9p21 (CDKN2A/B, ANRIL)	Foroud T 2012. Intracranial aneurysm	-0.0163803	0.00223691	2.2e-13	0.0180495	0.00327211	3.8e-08	0.0093629	0.00198334	2.9e-06	0.0134574	0.00264877	3.7e-07	0.00964465	0.00276419	0.00049	-0.0134897	0.00189084	8.7e-13	-0.00556055	0.00168979	0.00093
rs1333040	9	22083404	C	T	0.415559	9p21 (CDKN2A/B, ANRIL)	Yasuno K 2010. Intracranial aneurysm	-0.013391	0.00226712	3.1e-09	0.0125551	0.00331727	0.00015	0.00782022	0.00200908	0.00012	0.0082464	0.00268541	0.0021	0.00788137	0.0028018	0.0047	-0.0102985	0.00191689	7.1e-08	-0.00492618	0.00171292	0.0036
rs1537370	9	22084310	C	T	0.519105	9p21 (CDKN2A/B, ANRIL)	van Setten J 2013. Coronary artery calcification	-0.0166082	0.00224075	1.1e-13	0.0185138	0.00327799	1.8e-08	0.00952726	0.00198678	2e-06	0.0136304	0.00265333	2.7e-07	0.00959774	0.00276923	0.00054	-0.0136819	0.00189407	4.6e-13	-0.00548915	0.00169272	0.0011
rs10738607	9	22088094	A	G	0.512891	9p21 (CDKN2A/B, ANRIL)	Wakil SM 2016. Coronary artery disease	-0.017512	0.00223741	4.5e-15	0.0204318	0.00327416	4.7e-10	0.0104465	0.00198421	1.8e-07	0.0145136	0.00264948	4.2e-08	0.0108453	0.00276529	9.1e-05	-0.0151838	0.00189101	8.9e-16	-0.00562389	0.00169001	0.00082
rs10757274	9	22096055	A	G	0.511389	9p21 (CDKN2A/B, ANRIL)	Lu X 2012. Coronary heart disease	-0.0176686	0.00223681	2.5e-15	0.0203082	0.00327308	6e-10	0.010731	0.00198445	8.3e-08	0.014284	0.00264878	6.8e-08	0.0111367	0.00276486	5.8e-05	-0.0150336	0.00189061	1.7e-15	-0.00580514	0.00168966	0.00055
rs10757274	9	22096055	A	G	0.511389	9p21 (CDKN2A/B, ANRIL)	Jones GT 2017. Abdominal aortic aneurysm	-0.0176686	0.00223681	2.5e-15	0.0203082	0.00327308	6e-10	0.010731	0.00198445	8.3e-08	0.014284	0.00264878	6.8e-08	0.0111367	0.00276486	5.8e-05	-0.0150336	0.00189061	1.7e-15	-0.00580514	0.00168966	0.00055
rs4977574	9	22098574	A	G	0.512884	9p21 (CDKN2A/B, ANRIL)	Schunkert 2013. CHD	-0.018022	0.00223656	7e-16	0.0203804	0.00327247	5.2e-10	0.0107507	0.00198391	8e-08	0.0143696	0.00264855	5.7e-08	0.0113058	0.00276438	4.5e-05	-0.0152649	0.00189042	6.2e-16	-0.00594456	0.0016895	0.0004
rs4977574	9	22098574	A	G	0.511583	9p21 (CDKN2A/B, ANRIL)	Kathiresan S 2009. Myocardial infarction (early onset)	-0.018022	0.00223656	7e-16	0.0203804	0.00327247	5.2e-10	0.0107507	0.00198391	8e-08	0.0143696	0.00264855	5.7e-08	0.0113058	0.00276438	4.5e-05	-0.0152649	0.00189042	6.2e-16	-0.00594456	0.0016895	0.0004
rs4977574	9	22098574	A	G	0.511583	9p21 (CDKN2A/B, ANRIL)	Reilly MP 2015. Coronary artery disease	-0.018022	0.00223656	7e-16	0.0203804	0.00327247	5.2e-10	0.0107507	0.00198391	8e-08	0.0143696	0.00264855	5.7e-08	0.0113058	0.00276438	4.5e-05	-0.0152649	0.00189042	6.2e-16	-0.00594456	0.0016895	0.0004
rs2891168	9	22098619	A	G	0.511573	9p21 (CDKN2A/B, ANRIL)	Nikpay M 2016. Myocardial infarction	-0.0179274	0.00223683	1e-15	0.0203881	0.00327275	5.2e-10	0.0106837	0.00198425	9.7e-08	0.0144109	0.00264882	5.2e-08	0.0112615	0.00276468	4.8e-05	-0.015184	0.00189063	8.9e-16	-0.00589393	0.00168969	0.00045
rs1556516	9	22100176	G	C	0.503198	9p21 (CDKN2A/B, ANRIL)	UKB 500K parents attained age analysis	-0.0181395	0.00223732	4.7e-16	0.0210204	0.00327301	1.5e-10	0.0111635	0.00198425	2.5e-08	0.0153348	0.00264942	7e-09	0.0110816	0.00276494	6.3e-05	-0.0154877	0.00189103	2.3e-16	-0.00606366	0.00169014	0.00031
rs1333042	9	22103813	A	G	0.501598	9p21 (CDKN2A/B, ANRIL)	Lee JY 2013. Coronary heart disease	-0.0180361	0.00223733	6.8e-16	0.0209765	0.00327284	1.6e-10	0.011211	0.00198387	2.2e-08	0.0153113	0.00264927	7.4e-09	0.0109701	0.00276483	7.4e-05	-0.0154042	0.00189109	3.4e-16	-0.00606235	0.00169016	0.00031
rs10733376	9	22114469	G	C	0.487464	9p21 (CDKN2A/B, ANRIL)	Foroud T 2015. Intracranial aneurysm	-0.0171348	0.00223753	1.9e-14	0.0205957	0.0032742	3.5e-10	0.0109201	0.00198443	5.1e-08	0.0147028	0.00264972	2.9e-08	0.0106773	0.00276472	0.00012	-0.014491	0.00189128	1.7e-14	-0.00595711	0.00169021	0.0004
rs10965235	9	22115105	C	A	0.998219	9p21 (CDKN2A/B, ANRIL)	Uno S 2010. Endometriosis	0.0174862	0.0278088	0.53	-0.00423771	0.0403884	0.91	0.00495793	0.0241563	0.85	0.00727566	0.0324439	0.83	0.00170829	0.0340834	1	0.0105594	0.0233378	0.65	-0.0146828	0.0209436	0.49
rs944797	9	22115286	T	C	0.489143	9p21 (CDKN2A/B, ANRIL)	Takeuchi F 2011. Coronary heart disease	-0.0172559	0.00223767	1.2e-14	0.0207127	0.00327495	2.8e-10	0.0109068	0.0019848	5.3e-08	0.0146285	0.00264997	3.4e-08	0.0107552	0.00276534	0.0001	-0.0145487	0.00189144	1.3e-14	-0.0059014	0.00169035	0.00046
rs2383207	9	22115959	A	G	0.487656	9p21 (CDKN2A/B, ANRIL)	Gretarsdottir S 2010. Abdominal aortic aneurysm	-0.0172113	0.00223668	1.4e-14	0.0208153	0.00327307	2.2e-10	0.0110934	0.00198361	3.1e-08	0.014679	0.00264865	3e-08	0.0108374	0.00276367	9.2e-05	-0.0144392	0.00189057	2.1e-14	-0.00606478	0.00168952	0.00032
rs10757278	9	22124477	A	G	0.518105	9p21 (CDKN2A/B, ANRIL)	Helgadottir A 2008. Myocardial infarction	-0.0171057	0.00223848	2.2e-14	0.0196614	0.00327551	2.2e-09	0.00967593	0.00198496	1.6e-06	0.0129992	0.00265093	9.2e-07	0.0115886	0.00276623	2.9e-05	-0.0143194	0.00189204	3.8e-14	-0.00592668	0.00169081	0.00044
rs1333049	9	22125503	G	C	0.518899	9p21 (CDKN2A/B, ANRIL)	Dichgans 2013. CHD	-0.01796	0.00223765	1e-15	0.0200662	0.00327393	9.8e-10	0.0105045	0.00198448	1.9e-07	0.0131842	0.00264968	6.3e-07	0.0115919	0.00276513	2.9e-05	-0.0147744	0.00189146	5.7e-15	-0.00636878	0.00169023	0.00016
rs1333049	9	22125503	G	C	0.517858	9p21 (CDKN2A/B, ANRIL)	WTCCC 2008. Coronary heart disease	-0.01796	0.00223765	1e-15	0.0200662	0.00327393	9.8e-10	0.0105045	0.00198448	1.9e-07	0.0131842	0.00264968	6.3e-07	0.0115919	0.00276513	2.9e-05	-0.0147744	0.00189146	5.7e-15	-0.00636878	0.00169023	0.00016
rs1333049	9	22125503	G	C	0.517858	9p21 (CDKN2A/B, ANRIL)	Samani NJ 2008. Coronary heart disease	-0.01796	0.00223765	1e-15	0.0200662	0.00327393	9.8e-10	0.0105045	0.00198448	1.9e-07	0.0131842	0.00264968	6.3e-07	0.0115919	0.00276513	2.9e-05	-0.0147744	0.00189146	5.7e-15	-0.00636878	0.00169023	0.00016
rs1333049	9	22125503	G	C	0.517858	9p21 (CDKN2A/B, ANRIL)	O'Donnell CJ 2012. Coronary artery calcification	-0.01796	0.00223765	1e-15	0.0200662	0.00327393	9.8e-10	0.0105045	0.00198448	1.9e-07	0.0131842	0.00264968	6.3e-07	0.0115919	0.00276513	2.9e-05	-0.0147744	0.00189146	5.7e-15	-0.00636878	0.00169023	0.00016
rs1333049	9	22125503	G	C	0.517858	9p21 (CDKN2A/B, ANRIL)	Wild PS 2011. Coronary heart disease	-0.01796	0.00223765	1e-15	0.0200662	0.00327393	9.8e-10	0.0105045	0.00198448	1.9e-07	0.0131842	0.00264968	6.3e-07	0.0115919	0.00276513	2.9e-05	-0.0147744	0.00189146	5.7e-15	-0.00636878	0.00169023	0.00016
rs1333049	9	22125503	G	C	0.517858	9p21 (CDKN2A/B, ANRIL)	Dichgans M 2014. Coronary artery disease or ischemic stroke	-0.01796	0.00223765	1e-15	0.0200662	0.00327393	9.8e-10	0.0105045	0.00198448	1.9e-07	0.0131842	0.00264968	6.3e-07	0.0115919	0.00276513	2.9e-05	-0.0147744	0.00189146	5.7e-15	-0.00636878	0.00169023	0.00016
rs1333049	9	22125503	G	C	0.517858	9p21 (CDKN2A/B, ANRIL)	Dichgans M 2014. Coronary artery disease or large artery stroke	-0.01796	0.00223765	1e-15	0.0200662	0.00327393	9.8e-10	0.0105045	0.00198448	1.9e-07	0.0131842	0.00264968	6.3e-07	0.0115919	0.00276513	2.9e-05	-0.0147744	0.00189146	5.7e-15	-0.00636878	0.00169023	0.00016
rs1333049	9	22125503	G	C	0.517858	9p21 (CDKN2A/B, ANRIL)	Dichgans M 2014. Coronary artery disease	-0.01796	0.00223765	1e-15	0.0200662	0.00327393	9.8e-10	0.0105045	0.00198448	1.9e-07	0.0131842	0.00264968	6.3e-07	0.0115919	0.00276513	2.9e-05	-0.0147744	0.00189146	5.7e-15	-0.00636878	0.00169023	0.00016
rs2383208	9	22132076	A	G	0.821554	9p21 (CDKN2A/B, ANRIL)	Imamura M 2016. Type 2 diabetes	0.000479662	0.00292142	0.84	-0.00320991	0.00428149	0.44	7.15065e-05	0.0025978	0.96	-0.000864248	0.00346322	0.78	-0.00265186	0.00361792	0.46	4.1304e-06	0.00247036	0.98	0.00115297	0.00220845	0.6
rs10965250	9	22133284	G	A	0.829016	9p21 (CDKN2A/B, ANRIL)	Voight BF 2010. Type 2 diabetes	-2.302e-05	0.00296972	0.97	-0.00229587	0.00435079	0.58	0.000862085	0.00263903	0.73	-0.000130427	0.00351898	0.94	-0.000548386	0.00367729	0.87	-0.000543878	0.00251087	0.85	0.00131959	0.0022449	0.55
rs10965250	9	22133284	G	A	0.829016	9p21 (CDKN2A/B, ANRIL)	PMID: 24296717; . Insulin secretion	-2.302e-05	0.00296972	0.97	-0.00229587	0.00435079	0.58	0.000862085	0.00263903	0.73	-0.000130427	0.00351898	0.94	-0.000548386	0.00367729	0.87	-0.000543878	0.00251087	0.85	0.00131959	0.0022449	0.55
rs10811661	9	22134094	T	C	0.827148	9p21 (CDKN2A/B, ANRIL)	Mahajan 2014. T2D	-0.000363008	0.00295266	0.94	-0.00155169	0.00432506	0.7	0.00121001	0.00262335	0.64	4.10031e-05	0.00349881	0.98	-0.00120104	0.00365659	0.73	-0.000869263	0.00249653	0.75	0.00130184	0.00223231	0.56
rs10811661	9	22134094	T	C	0.82649	9p21 (CDKN2A/B, ANRIL)	Hara K 2014. Type 2 diabetes	-0.000363008	0.00295266	0.94	-0.00155169	0.00432506	0.7	0.00121001	0.00262335	0.64	4.10031e-05	0.00349881	0.98	-0.00120104	0.00365659	0.73	-0.000869263	0.00249653	0.75	0.00130184	0.00223231	0.56
rs10811661	9	22134094	T	C	0.82649	9p21 (CDKN2A/B, ANRIL)	Mahajan A 2014. Type 2 diabetes	-0.000363008	0.00295266	0.94	-0.00155169	0.00432506	0.7	0.00121001	0.00262335	0.64	4.10031e-05	0.00349881	0.98	-0.00120104	0.00365659	0.73	-0.000869263	0.00249653	0.75	0.00130184	0.00223231	0.56
rs10811661	9	22134094	T	C	0.82649	9p21 (CDKN2A/B, ANRIL)	Hwang JY 2015. Fasting plasma glucose	-0.000363008	0.00295266	0.94	-0.00155169	0.00432506	0.7	0.00121001	0.00262335	0.64	4.10031e-05	0.00349881	0.98	-0.00120104	0.00365659	0.73	-0.000869263	0.00249653	0.75	0.00130184	0.00223231	0.56
rs10811661	9	22134094	T	C	0.82649	9p21 (CDKN2A/B, ANRIL)	Cook JP 2017. Type 2 diabetes	-0.000363008	0.00295266	0.94	-0.00155169	0.00432506	0.7	0.00121001	0.00262335	0.64	4.10031e-05	0.00349881	0.98	-0.00120104	0.00365659	0.73	-0.000869263	0.00249653	0.75	0.00130184	0.00223231	0.56
rs1333051	9	22136489	A	T	0.863252	9p21 (CDKN2A/B, ANRIL)	Parra EJ 2011. Type 2 diabetes	-0.00312738	0.00325599	0.35	0.00250457	0.00476989	0.62	0.00386389	0.00289375	0.18	0.000639937	0.00385758	0.91	0.00425817	0.0040322	0.3	-0.00258367	0.00275231	0.36	-0.000661443	0.00246109	0.79
rs7018475	9	22137685	T	G	0.743576	9p21 (CDKN2A/B, ANRIL)	Huang J 2012. Type 2 diabetes	-0.00120056	0.00256444	0.63	0.00889557	0.00374519	0.017	0.000869531	0.00225743	0.68	0.00340596	0.00303599	0.25	0.00477759	0.003165	0.13	0.000651064	0.0021678	0.78	-0.000542378	0.00193579	0.77
rs2065504	9	22141552	G	T	0.483953	9p21 (CDKN2A/B, ANRIL)	Astle et al. 2016 Cell. . Compound white cell [MONO%] Monocyte percentage of white cells	0.000619835	0.00223842	0.78	0.00286433	0.00327776	0.38	0.00149992	0.0019864	0.46	0.00263434	0.00265223	0.31	0.000522121	0.00276864	0.85	0.00027815	0.00189215	0.89	0.000664332	0.00169074	0.69
rs12117661	1	55487346	C	G	0.753193	BSND	McDaid AF 2017, Bayesian analysis of lifespan	0.00955751	0.00260612	0.00024	-0.00711278	0.00381046	0.064	-0.00374235	0.00231009	0.091	-0.00727355	0.00308795	0.02	0.000109287	0.00322172	0.99	0.00414683	0.00254728	0.1	0.010476	0.00253375	3.3e-05
rs17114036	1	56962821	A	G	0.907376	PPAP2B	McDaid AF 2017, Bayesian analysis of lifespan	0.0120038	0.00386112	0.002	-0.00654143	0.00564301	0.27	-0.00566522	0.00340158	0.092	-0.00789847	0.00456853	0.089	-0.00502169	0.00478896	0.3	0.0123458	0.00377539	0.0012	0.00808756	0.00375121	0.035
rs646776	1	109818530	C	T	0.222468	CELSR2	McDaid AF 2017, Bayesian analysis of lifespan	-0.0144309	0.00268634	7.6e-08	0.0122313	0.00392631	0.0017	0.0078773	0.00238063	0.0012	0.0107041	0.00317844	0.0008	0.00797276	0.00332344	0.017	-0.00786435	0.00262583	0.0029	-0.0155567	0.00261001	1.9e-09
rs2909448	2	162866255	C	T	0.444977	DPP4	McDaid AF 2017, Bayesian analysis of lifespan	0.00201596	0.00226081	0.35	-0.0016912	0.00330355	0.58	-0.00314626	0.00200034	0.11	-0.0041224	0.00267594	0.11	0.00184239	0.00279371	0.53	0.000544583	0.00220823	0.78	0.00286736	0.00219796	0.18
rs2352974	3	49890613	C	T	0.509344	TRAIP	McDaid AF 2017, Bayesian analysis of lifespan	-0.00951528	0.00224557	1.8e-05	0.00901789	0.00328524	0.0054	0.00762603	0.00198482	0.00011	0.00770071	0.00265757	0.0037	0.00830269	0.00277554	0.0029	-0.0107285	0.00219398	8.6e-07	-0.0056366	0.00218217	0.0079
rs362296	4	3247007	C	A	0.625396	MSANTD1	McDaid AF 2017, Bayesian analysis of lifespan	0.00472347	0.00232375	0.04	-0.0070726	0.00339578	0.034	-0.00129941	0.00205239	0.52	-0.00465901	0.00274883	0.087	-0.00480307	0.00287444	0.096	0.00575925	0.00227039	0.011	0.00517142	0.00225802	0.02
rs3936510	5	55860866	G	T	0.799226	C5ORF67	McDaid AF 2017, Bayesian analysis of lifespan	-0.00656435	0.0027885	0.019	0.00135428	0.00407702	0.77	-0.00490792	0.00246523	0.051	0.00385736	0.00330427	0.24	0.000661924	0.00344169	0.84	-0.00251084	0.00272413	0.35	-0.00853568	0.00271006	0.0017
rs6904450	6	50921602	A	T	0.818826	FTH1P5	McDaid AF 2017, Bayesian analysis of lifespan	-0.0110405	0.00290749	0.00014	0.00791295	0.00424493	0.064	0.00679998	0.00257481	0.0083	0.006265	0.00344262	0.068	0.00510757	0.00358554	0.16	-0.00921338	0.00283831	0.0012	-0.0052623	0.00282461	0.058
rs10455872	6	161010118	A	G	0.920343	LPA	McDaid AF 2017, Bayesian analysis of lifespan	-0.0360743	0.00413455	2.1e-18	0.0395591	0.00602745	6.7e-11	0.0201722	0.00362746	2.2e-08	0.0246912	0.00489358	4.8e-07	0.0264696	0.00508758	2.1e-07	-0.0251185	0.00403775	4.9e-10	-0.0333254	0.00401498	5.6e-17
rs1581675	8	19858499	T	A	0.735058	LPL	McDaid AF 2017, Bayesian analysis of lifespan	0.0103203	0.00253613	4e-05	-0.00694301	0.00370773	0.064	-0.00108294	0.00224435	0.65	-0.010214	0.00300506	0.00066	-0.00408625	0.00313362	0.19	0.00678732	0.00247767	0.0059	0.0123965	0.00246493	4.1e-07
rs1333045	9	22119195	T	C	0.484993	CDKN2BAS	McDaid AF 2017, Bayesian analysis of lifespan	-0.0171465	0.00224365	2e-14	0.0201518	0.00328024	8.8e-10	0.0096351	0.00198618	1.6e-06	0.0120615	0.00265674	5.4e-06	0.0126063	0.00277094	5.7e-06	-0.00967752	0.00219166	9.8e-06	-0.0164257	0.0021798	5.3e-14
rs951266	15	78878541	G	A	0.670568	CHRNA5	McDaid AF 2017, Bayesian analysis of lifespan	-0.025076	0.0023817	6.4e-26	0.023572	0.00348304	1.2e-11	0.012838	0.00210351	1e-09	0.0212804	0.00281949	5.7e-14	0.00833777	0.00294249	0.0047	-0.0118398	0.0023265	3.6e-07	-0.0270016	0.00231369	2e-31
rs729583	16	12532918	C	G	0.390838	SNX29	McDaid AF 2017, Bayesian analysis of lifespan	-0.00524522	0.00230084	0.025	0.00062953	0.00335956	0.84	-0.000106148	0.00203575	0.94	0.00464811	0.00272125	0.089	0.00161421	0.00284087	0.56	-0.00141736	0.00224716	0.54	-0.00775818	0.00223618	0.00058
rs2008514	16	28825605	G	A	0.597548	NPIPB8	McDaid AF 2017, Bayesian analysis of lifespan	-0.0025925	0.0022802	0.25	0.00488559	0.00333778	0.14	0.00184406	0.00202114	0.39	0.00419805	0.00270041	0.12	0.00450691	0.00281968	0.11	-0.00288144	0.00222755	0.2	-0.00210083	0.00221566	0.31
rs9939973	16	53800568	G	A	0.577445	FTO	McDaid AF 2017, Bayesian analysis of lifespan	-0.00270454	0.00226731	0.26	0.00504914	0.00331482	0.15	-0.000249257	0.00200726	0.85	0.0045134	0.00268065	0.1	-0.00133457	0.00280284	0.6	-0.000217875	0.00221462	0.94	-0.00443295	0.00220168	0.051
rs4420638	19	45422946	A	G	0.810211	APOC1	McDaid AF 2017, Bayesian analysis of lifespan	-0.046629	0.00285332	4.8e-60	0.0382276	0.00415542	4.9e-20	0.0334729	0.00251035	2.6e-40	0.0232342	0.00337414	6.6e-12	0.0287514	0.00350993	2.2e-16	-0.0424778	0.00278658	1.8e-52	-0.027244	0.00277261	1.1e-22
