# Supplementary material for: Human longevity: 25 genetic loci associated in 389,166 UK biobank participants
Source: Aging (Albany NY). 2017 Dec 6;9(12):2504–20. doi: 10.18632/aging.101334 (PMC5764389; doi:10.18632/aging.101334)
Supplement: Supplementary file 4 [file aging-09-2504-s004.xlsx]

## Sheet: SI Table
UK Biobank GWAS analysis – parents age at death phenotypes
	11,516,125 autosomal imputed variants analysed (Minor Allele Frequency >0.1%, Imputation quality >0.1, Hardy-Weinberg Equilibrium p>1x10-6)
						Parents attained age - GWAS of Martingale residuals in linear analysis (BOLT-LMM) in 389,166 EUR participants				Result from CoxPH model against parents attained age (in 326,864 un-related participants)
	Lead SNP	CHR	BP	A1	A0	A1FREQ	BETA	SE	P	HR	SE	P	Implicated gene(s)	Previous associations with locus
	rs602633	1	109821511	T	G	0.217284	-0.0150436	0.00270781	2.7e-08	1.02155	0.0042008	2.2e-07	CLESR2 ... PSRC1	CAD, LDL cholesterol
	rs28383322	6	32592796	C	T	0.782851	0.0182341	0.0027717	5.3e-11	0.979639	0.0041401	1.1e-06	HLA-DRB1… HLA-DQA1	Atopic dermatitis
	rs55730499	6	161005610	C	T	0.91967	-0.0360673	0.00412336	1.7e-18	1.0518	0.0065235	3.9e-16	LPA	CAD, MI
	rs1556516	9	22100176	G	C	0.50188	-0.0181395	0.00223732	4.7e-16	1.02121	0.0034718	6.7e-10	CDKN2B-AS1 (ANRIL)	CAD, FEV1, MI, arterial calcification
	rs7137828	12	111932800	C	T	0.483373	0.0170014	0.0022411	3.4e-14	0.977552	0.0033226	2.4e-11	SH2B3 / ATXN2	CAD, DBP, SBP, TNFa, cell counts, Hgb, colorectal cancer
	rs1317286	15	78896129	A	G	0.668243	-0.025403	0.00237732	1.2e-26	1.03314	0.0037229	1.4e-19	CHRNA3	Cigarettes per day, FEV1
	rs17514846	15	91416550	C	A	0.529781	-0.0139434	0.00225931	7.1e-10	1.01805	0.0034914	1.8e-07	FURIN	DBP, SBP
	rs429358	19	45411941	T	C	0.844963	-0.056563	0.00309374	1.4e-74	1.08858	0.0050658	2.5e-74	APOE / APOC1	AD, AMD, CAD, CRP, HDL, LDL, BMI, cell counts
	rs7844965	8	27442064	G	A	0.768058	0.0153816	0.00266437	7.7e-09	0.981311	0.003972	3.1e-06	EPHX2
	rs61978928	14	75321714	T	C	0.688374	0.0135715	0.00241753	2e-08	0.980583	0.0036002	9.3e-08	PROX2
Lead SNP = SNPs with lowest p-value in 1Mb region, BP = Genomic position, build 37 (hg19), BETA = Effect on outcome with respect to A1 (the effect allele), P = BOLT LMM p-value
Implicated gene(s)=Variants in locus usually intronic, or exonic (indicated by underlining). If two genes separated by dots, the SNP is intergenic
Previous locus associations from GWAS catalogue
BOLT-LMM models included age, sex, assessment centre and array type as covariates. The CoxPH models also include principal components 1-5
