# Supplementary material for: Human longevity: 25 genetic loci associated in 389,166 UK biobank participants
Source: Aging (Albany NY). 2017 Dec 6;9(12):2504–20. doi: 10.18632/aging.101334 (PMC5764389; doi:10.18632/aging.101334)
Supplement: Supplementary file 5 [file aging-09-2504-s005.xlsx]

## Sheet: Sheet1
UK Biobank GWAS of parents attained age - results from MAGENTA gene-set enrichment analysis
	Bonferroni p-value cut-off for 10891 tests = 4.6x10-6
NGENES=the number of genes in the data that are in the gene set
BETA=the regression coefficient of the gene set
BETA_STD= the semi-standardized regression coefficient, corresponding to the predicted change in Z-value given a change of one standard deviation in the predictor gene set
	See the MAGMA software manual (http://ctg.cncr.nl/software/magma) for full details
SET	NGENES	BETA	BETA_STD	SE	P	FULL_NAME
Curated_gene_sets:reac...	10	1.97	0.0469	0.325	6.8736e-10	Curated_gene_sets:reactome_presynaptic_nicotinic_acetylcholine_receptors
Curated_gene_sets:reac...	12	1.69	0.0441	0.3	8.4682e-09	Curated_gene_sets:reactome_acetylcholine_binding_and_downstream_events
Curated_gene_sets:reac...	11	1.71	0.0427	0.305	1.0201e-08	Curated_gene_sets:reactome_highly_calcium_permeable_postsynaptic_nicotinic_acetylcholine_receptors
GO_cc:go_acetylcholine...	18	1.24	0.0395	0.235	6.6035e-08	GO_cc:go_acetylcholine_gated_channel_complex
GO_mf:go_acetylcholine...	19	1.06	0.0346	0.234	3.1221e-06	GO_mf:go_acetylcholine_binding
GO_bp:go_regulation_of...	110	0.395	0.0311	0.0943	1.398e-05	GO_bp:go_regulation_of_calcium_ion_transmembrane_transport
GO_mf:go_neurotransmit...	25	0.834	0.0313	0.2	1.5871e-05	GO_mf:go_neurotransmitter_binding
GO_bp:go_neuromuscular...	23	0.835	0.0301	0.21	3.6012e-05	GO_bp:go_neuromuscular_synaptic_transmission
GO_bp:go_positive_regu...	56	0.519	0.0292	0.131	3.9025e-05	GO_bp:go_positive_regulation_of_calcium_ion_transmembrane_transport
GO_mf:go_identical_pro...	1084	0.113	0.0271	0.0291	5.2752e-05	GO_mf:go_identical_protein_binding
GO_bp:go_insulin_like_...	12	1.15	0.0298	0.296	5.3916e-05	GO_bp:go_insulin_like_growth_factor_receptor_signaling_pathway
GO_bp:go_regulation_of...	67	0.466	0.0286	0.12	5.4626e-05	GO_bp:go_regulation_of_calcium_ion_transmembrane_transporter_activity
GO_bp:go_positive_regu...	91	0.384	0.0275	0.101	7.2174e-05	GO_bp:go_positive_regulation_of_cation_transmembrane_transport
GO_mf:go_low_density_l...	15	1.03	0.03	0.272	7.5505e-05	GO_mf:go_low_density_lipoprotein_particle_binding
Curated_gene_sets:reac...	167	0.287	0.0277	0.0765	8.8311e-05	Curated_gene_sets:reactome_transmission_across_chemical_synapses
GO_mf:go_acetylcholine...	25	0.709	0.0266	0.19	9.6085e-05	GO_mf:go_acetylcholine_receptor_activity
Curated_gene_sets:reac...	255	0.231	0.0276	0.0623	0.00010319	Curated_gene_sets:reactome_neuronal_system
GO_bp:go_transcription...	140	0.294	0.0261	0.0796	0.00010801	GO_bp:go_transcription_initiation_from_rna_polymerase_ii_promoter
GO_bp:go_regulation_of...	23	0.762	0.0274	0.206	0.00011177	GO_bp:go_regulation_of_voltage_gated_calcium_channel_activity
GO_bp:go_coronary_vasc...	36	0.62	0.0279	0.169	0.00012349	GO_bp:go_coronary_vasculature_development
Curated_gene_sets:mars...	1152	0.107	0.0264	0.0295	0.00014538	Curated_gene_sets:marson_bound_by_foxp3_unstimulated
GO_cc:go_receptor_complex	296	0.204	0.0262	0.057	0.00017136	GO_cc:go_receptor_complex
GO_bp:go_artery_develo...	72	0.402	0.0256	0.113	0.00019016	GO_bp:go_artery_development
GO_bp:go_positive_regu...	30	0.646	0.0266	0.184	0.00021746	GO_bp:go_positive_regulation_of_calcium_ion_transmembrane_transporter_activity
GO_bp:go_negative_regu...	11	0.894	0.0223	0.259	0.00027557	GO_bp:go_negative_regulation_of_protein_oligomerization
GO_bp:go_positive_regu...	20	0.68	0.0229	0.199	0.00030982	GO_bp:go_positive_regulation_of_adherens_junction_organization
GO_bp:go_germ_cell_dev...	194	0.22	0.0229	0.0644	0.00032383	GO_bp:go_germ_cell_development
Curated_gene_sets:reac...	121	0.304	0.025	0.0893	0.00033398	Curated_gene_sets:reactome_neurotransmitter_receptor_binding_and_downstream_transmission_in_the_postsynaptic_cell
Curated_gene_sets:brow...	55	0.416	0.0231	0.122	0.0003429	Curated_gene_sets:browne_hcmv_infection_1hr_up
GO_bp:go_focal_adhesio...	22	0.684	0.0241	0.203	0.0003753	GO_bp:go_focal_adhesion_assembly
GO_bp:go_cell_substrat...	22	0.684	0.0241	0.203	0.0003753	GO_bp:go_cell_substrate_adherens_junction_assembly
GO_cc:go_nucleoplasm_part	638	0.123	0.0229	0.0364	0.00038216	GO_cc:go_nucleoplasm_part
GO_bp:go_multi_organis...	787	0.113	0.0234	0.0337	0.00038241	GO_bp:go_multi_organism_reproductive_process
GO_bp:go_positive_regu...	121	0.293	0.0242	0.0872	0.00038885	GO_bp:go_positive_regulation_of_transmembrane_transport
GO_cc:go_transporter_c...	288	0.194	0.0245	0.0577	0.00039051	GO_cc:go_transporter_complex
GO_mf:go_virus_recepto...	69	0.392	0.0244	0.117	0.00040254	GO_mf:go_virus_receptor_activity
GO_cc:go_histone_methy...	65	0.371	0.0225	0.111	0.00040871	GO_cc:go_histone_methyltransferase_complex
GO_bp:go_synaptic_tran...	31	0.564	0.0236	0.17	0.00044557	GO_bp:go_synaptic_transmission_cholinergic
GO_cc:go_methyltransfe...	84	0.326	0.0224	0.0982	0.00044578	GO_cc:go_methyltransferase_complex
Curated_gene_sets:addy...	71	0.378	0.0239	0.114	0.00045726	Curated_gene_sets:addya_erythroid_differentiation_by_hemin
GO_mf:go_excitatory_ex...	45	0.495	0.0249	0.15	0.00048456	GO_mf:go_excitatory_extracellular_ligand_gated_ion_channel_activity
Curated_gene_sets:debi...	263	0.19	0.023	0.0578	0.00049306	Curated_gene_sets:debiasi_apoptosis_by_reovirus_infection_dn
GO_bp:go_positive_regu...	1054	0.0992	0.0235	0.0303	0.00053207	GO_bp:go_positive_regulation_of_developmental_process
GO_bp:go_interaction_w...	131	0.274	0.0235	0.0838	0.00054227	GO_bp:go_interaction_with_host
Curated_gene_sets:lope...	12	0.802	0.0209	0.246	0.00054959	Curated_gene_sets:lopez_mesothelioma_survival_up
GO_bp:go_positive_regu...	52	0.469	0.0254	0.145	0.00061097	GO_bp:go_positive_regulation_of_synapse_assembly
GO_mf:go_protein_lipid...	24	0.647	0.0238	0.201	0.00063896	GO_mf:go_protein_lipid_complex_binding
GO_bp:go_dopamine_tran...	10	1.12	0.0265	0.347	0.00064919	GO_bp:go_dopamine_transport
GO_bp:go_negative_regu...	1372	0.0869	0.0232	0.0271	0.00068408	GO_bp:go_negative_regulation_of_nitrogen_compound_metabolic_process
GO_bp:go_positive_regu...	22	0.635	0.0224	0.199	0.00070391	GO_bp:go_positive_regulation_of_cell_junction_assembly
GO_bp:go_vasculature_d...	436	0.146	0.0227	0.0459	0.00071794	GO_bp:go_vasculature_development
GO_mf:go_growth_factor...	113	0.294	0.0234	0.0929	0.00077647	GO_mf:go_growth_factor_binding
GO_bp:go_cellular_resp...	21	0.615	0.0212	0.195	0.00079432	GO_bp:go_cellular_response_to_interleukin_6
Curated_gene_sets:reac...	326	0.177	0.0238	0.0561	0.00080421	Curated_gene_sets:reactome_generic_transcription_pathway
GO_bp:go_positive_regu...	275	0.18	0.0223	0.0571	0.00080452	GO_bp:go_positive_regulation_of_cell_projection_organization
GO_bp:go_response_to_a...	132	0.262	0.0225	0.0831	0.00080726	GO_bp:go_response_to_alkaloid
GO_bp:go_adult_walking...	29	0.588	0.0238	0.187	0.00083116	GO_bp:go_adult_walking_behavior
GO_bp:go_walking_behavior	29	0.588	0.0238	0.187	0.00083116	GO_bp:go_walking_behavior
GO_bp:go_positive_regu...	14	0.888	0.025	0.283	0.00086792	GO_bp:go_positive_regulation_of_creb_transcription_factor_activity
Curated_gene_sets:st_g...	35	0.473	0.021	0.151	0.00087944	Curated_gene_sets:st_ga13_pathway
Curated_gene_sets:reac...	27	0.574	0.0224	0.184	0.00091007	Curated_gene_sets:reactome_lipoprotein_metabolism
Curated_gene_sets:lope...	6	0.896	0.0165	0.288	0.00095433	Curated_gene_sets:lopez_mesothelioma_survival_overall_up
GO_bp:go_negative_regu...	14	0.791	0.0222	0.255	0.00097474	GO_bp:go_negative_regulation_of_smooth_muscle_cell_migration
GO_bp:go_negative_regu...	180	0.212	0.0212	0.0684	0.00098657	GO_bp:go_negative_regulation_of_apoptotic_signaling_pathway
GO_mf:go_neurotransmit...	57	0.403	0.0229	0.13	0.00098952	GO_mf:go_neurotransmitter_receptor_activity
GO_bp:go_response_to_n...	47	0.417	0.0215	0.135	0.0009912	GO_bp:go_response_to_nicotine
GO_mf:go_apolipoprotei...	14	0.838	0.0236	0.271	0.0010032	GO_mf:go_apolipoprotein_binding
Curated_gene_sets:kyng...	25	0.644	0.0242	0.209	0.0010234	Curated_gene_sets:kyng_environmental_stress_response_not_by_uv_in_old
GO_bp:go_positive_regu...	50	0.422	0.0224	0.137	0.0010246	GO_bp:go_positive_regulation_of_calcium_ion_transport_into_cytosol
GO_bp:go_positive_regu...	37	0.494	0.0226	0.16	0.0010256	GO_bp:go_positive_regulation_of_release_of_sequestered_calcium_ion_into_cytosol
GO_mf:go_extracellular...	60	0.418	0.0243	0.136	0.001026	GO_mf:go_extracellular_ligand_gated_ion_channel_activity
Curated_gene_sets:kang...	33	0.534	0.023	0.173	0.001038	Curated_gene_sets:kang_glis3_targets
GO_bp:go_positive_regu...	72	0.355	0.0226	0.115	0.0010387	GO_bp:go_positive_regulation_of_transporter_activity
Curated_gene_sets:john...	127	0.236	0.02	0.0769	0.0010508	Curated_gene_sets:johnstone_parvb_targets_2_up
Curated_gene_sets:smid...	35	0.494	0.022	0.161	0.001057	Curated_gene_sets:smid_breast_cancer_relapse_in_lung_dn
GO_bp:go_cell_substrat...	38	0.482	0.0223	0.157	0.0010679	GO_bp:go_cell_substrate_junction_assembly
Curated_gene_sets:fras...	74	0.339	0.0219	0.111	0.0011135	Curated_gene_sets:frasor_response_to_estradiol_dn
GO_bp:go_regulation_of...	87	0.325	0.0227	0.106	0.0011153	GO_bp:go_regulation_of_calcium_ion_transport_into_cytosol
GO_bp:go_macromolecula...	24	0.626	0.023	0.206	0.001176	GO_bp:go_macromolecular_complex_remodeling
GO_bp:go_plasma_lipopr...	24	0.626	0.023	0.206	0.001176	GO_bp:go_plasma_lipoprotein_particle_remodeling
GO_bp:go_protein_lipid...	24	0.626	0.023	0.206	0.001176	GO_bp:go_protein_lipid_complex_remodeling
Curated_gene_sets:iked...	103	0.314	0.0239	0.103	0.0011878	Curated_gene_sets:ikeda_mir30_targets_up
GO_bp:go_reproduction	1156	0.0869	0.0215	0.0286	0.0012104	GO_bp:go_reproduction
GO_bp:go_regulation_of...	195	0.214	0.0224	0.071	0.0012873	GO_bp:go_regulation_of_cation_transmembrane_transport
GO_mf:go_protein_homod...	637	0.113	0.0211	0.0376	0.0013073	GO_mf:go_protein_homodimerization_activity
GO_bp:go_dna_templated...	189	0.205	0.0211	0.0682	0.0013268	GO_bp:go_dna_templated_transcription_initiation
Curated_gene_sets:lee_...	45	0.416	0.0209	0.139	0.0013482	Curated_gene_sets:lee_liver_cancer
Curated_gene_sets:brun...	7	1.09	0.0217	0.365	0.001408	Curated_gene_sets:bruneau_heart_great_vessels_and_valvulogenesis
GO_bp:go_positive_regu...	44	0.453	0.0226	0.152	0.0014393	GO_bp:go_positive_regulation_of_receptor_activity
GO_bp:go_cell_aging	60	0.37	0.0215	0.125	0.0014958	GO_bp:go_cell_aging
GO_bp:go_regulation_of...	10	0.862	0.0205	0.291	0.0015318	GO_bp:go_regulation_of_cholesterol_homeostasis
GO_bp:go_ventricular_s...	26	0.537	0.0206	0.181	0.0015412	GO_bp:go_ventricular_system_development
GO_bp:go_response_to_i...	24	0.531	0.0195	0.179	0.0015424	GO_bp:go_response_to_interleukin_6
Curated_gene_sets:rash...	19	0.644	0.0211	0.218	0.0015557	Curated_gene_sets:rashi_nfkb1_targets
Curated_gene_sets:reac...	13	0.909	0.0246	0.308	0.0015657	Curated_gene_sets:reactome_organic_cation_anion_zwitterion_transport
GO_bp:go_regulation_of...	70	0.351	0.022	0.119	0.0015868	GO_bp:go_regulation_of_release_of_sequestered_calcium_ion_into_cytosol
GO_bp:go_regulation_of...	46	0.404	0.0206	0.137	0.0016016	GO_bp:go_regulation_of_adherens_junction_organization
Curated_gene_sets:bass...	98	0.278	0.0207	0.0945	0.0016133	Curated_gene_sets:basso_cd40_signaling_up
GO_bp:go_regulation_of...	42	0.408	0.0198	0.138	0.0016167	GO_bp:go_regulation_of_plasma_lipoprotein_particle_levels
GO_bp:go_endocrine_pan...	40	0.461	0.0219	0.157	0.0016542	GO_bp:go_endocrine_pancreas_development
Curated_gene_sets:verr...	12	0.759	0.0198	0.258	0.0016564	Curated_gene_sets:verrecchia_response_to_tgfb1_c4
GO_bp:go_regulation_of...	100	0.279	0.0209	0.0952	0.0016723	GO_bp:go_regulation_of_synapse_organization
GO_mf:go_protein_dimer...	1031	0.0897	0.021	0.0307	0.0017518	GO_mf:go_protein_dimerization_activity
GO_bp:go_catecholamine...	12	0.929	0.0242	0.318	0.0017599	GO_bp:go_catecholamine_transport
Curated_gene_sets:shin...	25	0.548	0.0206	0.189	0.001824	Curated_gene_sets:shin_b_cell_lymphoma_cluster_7
GO_bp:go_endochondral_...	43	0.424	0.0209	0.146	0.0018654	GO_bp:go_endochondral_bone_morphogenesis
GO_bp:go_protein_lipid...	35	0.446	0.0198	0.154	0.0019146	GO_bp:go_protein_lipid_complex_subunit_organization
GO_bp:go_regulation_of...	68	0.365	0.0226	0.126	0.0019178	GO_bp:go_regulation_of_synapse_assembly
Curated_gene_sets:plas...	194	0.2	0.0208	0.0692	0.0019338	Curated_gene_sets:plasari_tgfb1_targets_10hr_up
Curated_gene_sets:dela...	53	0.386	0.0211	0.135	0.0020732	Curated_gene_sets:delaserna_myod_targets_dn
GO_bp:go_regulation_of...	83	0.314	0.0214	0.11	0.0021606	GO_bp:go_regulation_of_cation_channel_activity
Curated_gene_sets:reac...	59	0.341	0.0196	0.12	0.0021912	Curated_gene_sets:reactome_signaling_by_tgf_beta_receptor_complex
Curated_gene_sets:chen...	98	0.278	0.0206	0.0975	0.002192	Curated_gene_sets:chen_lvad_support_of_failing_heart_up
GO_bp:go_notch_recepto...	15	0.766	0.0223	0.269	0.0022208	GO_bp:go_notch_receptor_processing
GO_bp:go_response_to_g...	442	0.132	0.0206	0.0463	0.0022247	GO_bp:go_response_to_growth_factor
GO_bp:go_apoptotic_dna...	13	0.851	0.0231	0.299	0.0022313	GO_bp:go_apoptotic_dna_fragmentation
GO_bp:go_regulation_of...	12	0.89	0.0232	0.313	0.0022388	GO_bp:go_regulation_of_chemokine_secretion
GO_bp:go_regulation_of...	1088	0.0839	0.0201	0.0295	0.0022455	GO_bp:go_regulation_of_organelle_organization
Curated_gene_sets:reac...	43	0.409	0.0201	0.144	0.0022634	Curated_gene_sets:reactome_lipid_digestion_mobilization_and_transport
GO_bp:go_positive_regu...	241	0.169	0.0196	0.0596	0.0022669	GO_bp:go_positive_regulation_of_protein_catabolic_process
Curated_gene_sets:bioc...	28	0.515	0.0205	0.182	0.0022804	Curated_gene_sets:biocarta_g1_pathway
GO_bp:go_positive_regu...	37	0.461	0.021	0.163	0.0023625	GO_bp:go_positive_regulation_of_cation_channel_activity
GO_bp:go_sexual_reprod...	642	0.104	0.0195	0.037	0.0024049	GO_bp:go_sexual_reproduction
GO_bp:go_spermatid_nuc...	15	0.587	0.0171	0.208	0.0024248	GO_bp:go_spermatid_nucleus_differentiation
GO_bp:go_interspecies_...	619	0.109	0.0199	0.0385	0.0024348	GO_bp:go_interspecies_interaction_between_organisms
GO_bp:go_symbiosis_enc...	619	0.109	0.0199	0.0385	0.0024348	GO_bp:go_symbiosis_encompassing_mutualism_through_parasitism
GO_mf:go_titin_binding	14	0.763	0.0215	0.271	0.0024594	GO_mf:go_titin_binding
GO_mf:go_quaternary_am...	44	0.43	0.0214	0.153	0.0024885	GO_mf:go_quaternary_ammonium_group_binding
GO_bp:go_regulation_of...	255	0.162	0.0193	0.0577	0.0024944	GO_bp:go_regulation_of_cellular_protein_catabolic_process
GO_bp:go_cellular_proc...	235	0.168	0.0192	0.0598	0.0025005	GO_bp:go_cellular_process_involved_in_reproduction_in_multicellular_organism
GO_cc:go_plasma_membra...	160	0.214	0.0202	0.0761	0.0025097	GO_cc:go_plasma_membrane_receptor_complex
Curated_gene_sets:garc...	165	0.202	0.0194	0.0721	0.0025336	Curated_gene_sets:garcia_targets_of_fli1_and_dax1_dn
Curated_gene_sets:bioc...	17	0.695	0.0215	0.248	0.0025631	Curated_gene_sets:biocarta_il10_pathway
Curated_gene_sets:sche...	17	0.685	0.0212	0.245	0.0025678	Curated_gene_sets:scheidereit_ikk_targets
GO_bp:go_regulation_of...	361	0.138	0.0195	0.0496	0.0026789	GO_bp:go_regulation_of_protein_catabolic_process
GO_bp:go_cochlea_devel...	36	0.454	0.0205	0.163	0.0026978	GO_bp:go_cochlea_development
GO_bp:go_movement_in_e...	84	0.285	0.0196	0.102	0.0027162	GO_bp:go_movement_in_environment_of_other_organism_involved_in_symbiotic_interaction
GO_bp:go_entry_into_ce...	84	0.285	0.0196	0.102	0.0027162	GO_bp:go_entry_into_cell_of_other_organism_involved_in_symbiotic_interaction
GO_bp:go_viral_entry_i...	84	0.285	0.0196	0.102	0.0027162	GO_bp:go_viral_entry_into_host_cell
GO_bp:go_entry_into_ot...	84	0.285	0.0196	0.102	0.0027162	GO_bp:go_entry_into_other_organism_involved_in_symbiotic_interaction
GO_bp:go_movement_in_h...	84	0.285	0.0196	0.102	0.0027162	GO_bp:go_movement_in_host_environment
GO_bp:go_entry_into_host	84	0.285	0.0196	0.102	0.0027162	GO_bp:go_entry_into_host
GO_bp:go_entry_into_ho...	84	0.285	0.0196	0.102	0.0027162	GO_bp:go_entry_into_host_cell
GO_cc:go_perinuclear_r...	591	0.108	0.0194	0.0389	0.0027303	GO_cc:go_perinuclear_region_of_cytoplasm
GO_cc:go_dendrite	408	0.132	0.0198	0.0474	0.0027742	GO_cc:go_dendrite
Curated_gene_sets:ozen...	24	0.518	0.0191	0.187	0.0027915	Curated_gene_sets:ozen_mir125b1_targets
Curated_gene_sets:jeps...	30	0.453	0.0186	0.163	0.0028157	Curated_gene_sets:jepsen_smrt_targets
GO_bp:go_gamete_genera...	516	0.114	0.0192	0.0413	0.0028827	GO_bp:go_gamete_generation
Curated_gene_sets:reac...	44	0.412	0.0205	0.149	0.0028881	Curated_gene_sets:reactome_nuclear_receptor_transcription_pathway
Curated_gene_sets:mccl...	76	0.296	0.0194	0.107	0.0028975	Curated_gene_sets:mcclung_cocaine_reward_5d
GO_cc:go_plasma_membra...	472	0.127	0.0204	0.0459	0.0029264	GO_cc:go_plasma_membrane_protein_complex
GO_bp:go_positive_regu...	15	0.661	0.0192	0.242	0.003102	GO_bp:go_positive_regulation_of_endothelial_cell_differentiation
Curated_gene_sets:park...	6	0.906	0.0167	0.332	0.0031724	Curated_gene_sets:park_osteoblast_differentiation_by_phenylamil_dn
Curated_gene_sets:pare...	514	0.117	0.0196	0.0428	0.0032148	Curated_gene_sets:parent_mtor_signaling_up
GO_bp:go_positive_regu...	1604	0.0678	0.0195	0.0249	0.0032419	GO_bp:go_positive_regulation_of_gene_expression
GO_bp:go_negative_regu...	677	0.101	0.0194	0.0373	0.0033227	GO_bp:go_negative_regulation_of_transcription_from_rna_polymerase_ii_promoter
GO_bp:go_negative_regu...	1365	0.0735	0.0196	0.0271	0.0033495	GO_bp:go_negative_regulation_of_gene_expression
GO_bp:go_regulation_of...	83	0.29	0.0198	0.107	0.0033585	GO_bp:go_regulation_of_cell_matrix_adhesion
Curated_gene_sets:reac...	33	0.483	0.0208	0.179	0.0034582	Curated_gene_sets:reactome_activation_of_nmda_receptor_upon_glutamate_binding_and_postsynaptic_events
GO_bp:go_chromatin_ass...	148	0.228	0.0208	0.0849	0.0035648	GO_bp:go_chromatin_assembly_or_disassembly
GO_bp:go_cellular_resp...	943	0.0858	0.0193	0.0319	0.0036045	GO_bp:go_cellular_response_to_endogenous_stimulus
Curated_gene_sets:ule_...	42	0.396	0.0193	0.148	0.0036447	Curated_gene_sets:ule_splicing_via_nova2
GO_bp:go_positive_regu...	434	0.123	0.019	0.0458	0.0036581	GO_bp:go_positive_regulation_of_cell_development
Curated_gene_sets:gaus...	173	0.2	0.0197	0.0746	0.003664	Curated_gene_sets:gaussmann_mll_af4_fusion_targets_f_up
GO_bp:go_regulation_of...	79	0.268	0.0179	0.1	0.0037198	GO_bp:go_regulation_of_chromosome_segregation
GO_bp:go_endothelial_c...	22	0.514	0.0181	0.192	0.0037441	GO_bp:go_endothelial_cell_proliferation
Curated_gene_sets:smir...	51	0.329	0.0177	0.123	0.003753	Curated_gene_sets:smirnov_response_to_ir_2hr_up
GO_bp:go_negative_regu...	81	0.273	0.0185	0.102	0.0037538	GO_bp:go_negative_regulation_of_intrinsic_apoptotic_signaling_pathway
GO_cc:go_protein_lipid...	38	0.429	0.0199	0.161	0.0037992	GO_cc:go_protein_lipid_complex
GO_bp:go_regulation_of...	60	0.34	0.0198	0.128	0.0038417	GO_bp:go_regulation_of_chemokine_production
GO_bp:go_monoamine_tra...	20	0.645	0.0217	0.242	0.0038666	GO_bp:go_monoamine_transport
GO_bp:go_positive_regu...	211	0.173	0.0188	0.065	0.0039294	GO_bp:go_positive_regulation_of_neuron_projection_development
Curated_gene_sets:schm...	7	1.09	0.0217	0.413	0.0041228	Curated_gene_sets:schmidt_por_targets_in_limb_bud_dn
GO_bp:go_regulation_of...	186	0.194	0.0198	0.0736	0.0041814	GO_bp:go_regulation_of_transporter_activity
GO_bp:go_positive_regu...	20	0.474	0.0159	0.18	0.0042375	GO_bp:go_positive_regulation_of_natural_killer_cell_mediated_immunity
GO_bp:go_replacement_o...	25	0.505	0.019	0.192	0.0042539	GO_bp:go_replacement_ossification
GO_bp:go_endochondral_...	25	0.505	0.019	0.192	0.0042539	GO_bp:go_endochondral_ossification
GO_bp:go_multicellular...	675	0.0964	0.0185	0.0367	0.0043413	GO_bp:go_multicellular_organism_reproduction
Curated_gene_sets:ueda...	82	0.264	0.0179	0.101	0.004368	Curated_gene_sets:ueda_central_clock
GO_bp:go_regulation_of...	137	0.212	0.0186	0.0808	0.0044051	GO_bp:go_regulation_of_proteasomal_ubiquitin_dependent_protein_catabolic_process
GO_bp:go_regulation_of...	1379	0.0699	0.0187	0.0267	0.004438	GO_bp:go_regulation_of_cell_differentiation
Curated_gene_sets:daco...	34	0.429	0.0188	0.164	0.0044398	Curated_gene_sets:dacosta_ercc3_allele_xpcs_vs_ttd_dn
GO_bp:go_positive_regu...	147	0.205	0.0187	0.0785	0.0044399	GO_bp:go_positive_regulation_of_cell_morphogenesis_involved_in_differentiation
Curated_gene_sets:gaut...	8	0.908	0.0193	0.35	0.0047162	Curated_gene_sets:gautschi_src_signaling
GO_bp:go_positive_regu...	1370	0.0688	0.0184	0.0265	0.0047266	GO_bp:go_positive_regulation_of_protein_metabolic_process
GO_bp:go_adult_behavior	126	0.219	0.0184	0.0844	0.0047314	GO_bp:go_adult_behavior
GO_bp:go_dna_methylati...	55	0.339	0.0189	0.131	0.0047624	GO_bp:go_dna_methylation_or_demethylation
GO_bp:go_cranial_nerve...	22	0.52	0.0183	0.201	0.0047918	GO_bp:go_cranial_nerve_morphogenesis
Curated_gene_sets:pid_...	43	0.374	0.0184	0.145	0.0048207	Curated_gene_sets:pid_tcptp_pathway
GO_bp:go_positive_regu...	78	0.286	0.019	0.111	0.0048828	GO_bp:go_positive_regulation_of_ossification
GO_bp:go_regulation_of...	1637	0.0634	0.0184	0.0245	0.004887	GO_bp:go_regulation_of_transcription_from_rna_polymerase_ii_promoter
GO_bp:go_developmental...	310	0.142	0.0186	0.0548	0.0048974	GO_bp:go_developmental_growth
Curated_gene_sets:reac...	12	0.784	0.0204	0.304	0.0049066	Curated_gene_sets:reactome_signaling_by_notch4
Curated_gene_sets:tonk...	16	0.544	0.0164	0.211	0.0049723	Curated_gene_sets:tonks_targets_of_runx1_runx1t1_fusion_granulocyte_dn
GO_bp:go_positive_regu...	49	0.374	0.0196	0.145	0.0049982	GO_bp:go_positive_regulation_of_stem_cell_differentiation
GO_bp:go_bone_morphoge...	76	0.286	0.0187	0.111	0.005004	GO_bp:go_bone_morphogenesis
GO_bp:go_positive_regu...	55	0.335	0.0187	0.13	0.0050132	GO_bp:go_positive_regulation_of_osteoblast_differentiation
GO_bp:go_regulation_of...	111	0.252	0.0199	0.098	0.0050149	GO_bp:go_regulation_of_receptor_activity
GO_bp:go_lipoprotein_m...	113	0.233	0.0186	0.0907	0.0051105	GO_bp:go_lipoprotein_metabolic_process
GO_bp:go_regulation_of...	885	0.0821	0.0179	0.032	0.0051401	GO_bp:go_regulation_of_cell_cycle
GO_bp:go_positive_regu...	53	0.313	0.0171	0.122	0.005197	GO_bp:go_positive_regulation_of_dendrite_development
GO_bp:go_entrainment_o...	18	0.544	0.0173	0.212	0.0052506	GO_bp:go_entrainment_of_circadian_clock_by_photoperiod
GO_bp:go_response_to_l...	258	0.148	0.0178	0.058	0.0052803	GO_bp:go_response_to_light_stimulus
Curated_gene_sets:bhat...	271	0.143	0.0175	0.0559	0.0053362	Curated_gene_sets:bhat_esr1_targets_via_akt1_up
Curated_gene_sets:chin...	14	0.565	0.0159	0.221	0.0053383	Curated_gene_sets:chin_breast_cancer_copy_number_dn
GO_bp:go_regulation_of...	28	0.458	0.0182	0.18	0.0053473	GO_bp:go_regulation_of_meiotic_nuclear_division
GO_bp:go_negative_regu...	39	0.405	0.019	0.159	0.0053925	GO_bp:go_negative_regulation_of_fat_cell_differentiation
Curated_gene_sets:pid_...	41	0.346	0.0166	0.136	0.0054319	Curated_gene_sets:pid_ecadherin_stabilization_pathway
GO_bp:go_cellular_resp...	1722	0.0622	0.0184	0.0244	0.0054675	GO_bp:go_cellular_response_to_organic_substance
GO_bp:go_detection_of_...	25	0.49	0.0184	0.193	0.0055282	GO_bp:go_detection_of_biotic_stimulus
Curated_gene_sets:kegg...	124	0.281	0.0235	0.111	0.0055657	Curated_gene_sets:kegg_systemic_lupus_erythematosus
Curated_gene_sets:guo_...	89	0.27	0.0191	0.106	0.0055874	Curated_gene_sets:guo_targets_of_irs1_and_irs2
GO_bp:go_regulation_of...	706	0.0923	0.0181	0.0364	0.0055945	GO_bp:go_regulation_of_cellular_component_biogenesis
GO_bp:go_dna_packaging	165	0.202	0.0195	0.0798	0.0055975	GO_bp:go_dna_packaging
Curated_gene_sets:bioc...	35	0.426	0.0189	0.168	0.0056117	Curated_gene_sets:biocarta_alk_pathway
Curated_gene_sets:reac...	69	0.353	0.022	0.139	0.005619	Curated_gene_sets:reactome_meiotic_synapsis
GO_bp:go_positive_regu...	147	0.201	0.0183	0.0794	0.0056445	GO_bp:go_positive_regulation_of_developmental_growth
GO_bp:go_lipoprotein_t...	12	0.796	0.0207	0.314	0.0056719	GO_bp:go_lipoprotein_transport
GO_bp:go_lipoprotein_l...	12	0.796	0.0207	0.314	0.0056719	GO_bp:go_lipoprotein_localization
Curated_gene_sets:kasl...	183	0.164	0.0166	0.065	0.0056948	Curated_gene_sets:kasler_hdac7_targets_1_up
Curated_gene_sets:gali...	6	1.1	0.0202	0.434	0.0057154	Curated_gene_sets:galie_tumor_stemness_genes
GO_bp:go_spermatid_dif...	114	0.206	0.0165	0.0815	0.0057861	GO_bp:go_spermatid_differentiation
Curated_gene_sets:zhu_...	50	0.339	0.018	0.134	0.0058135	Curated_gene_sets:zhu_cmv_8_hr_dn
GO_bp:go_regulation_of...	27	0.443	0.0173	0.176	0.0058176	GO_bp:go_regulation_of_endothelial_cell_differentiation
GO_bp:go_regulation_of...	11	0.667	0.0166	0.264	0.0058517	GO_bp:go_regulation_of_amyloid_precursor_protein_catabolic_process
GO_bp:go_positive_regu...	220	0.162	0.018	0.0645	0.0058767	GO_bp:go_positive_regulation_of_growth
GO_bp:go_oogenesis	64	0.292	0.0175	0.116	0.0058854	GO_bp:go_oogenesis
GO_cc:go_calcium_chann...	60	0.319	0.0186	0.127	0.0060635	GO_cc:go_calcium_channel_complex
GO_bp:go_positive_regu...	1757	0.0596	0.0178	0.0238	0.0061017	GO_bp:go_positive_regulation_of_response_to_stimulus
GO_bp:go_heterophilic_...	43	0.353	0.0174	0.141	0.0061425	GO_bp:go_heterophilic_cell_cell_adhesion_via_plasma_membrane_cell_adhesion_molecules
GO_bp:go_growth	382	0.124	0.0181	0.0496	0.0061506	GO_bp:go_growth
GO_bp:go_negative_regu...	794	0.0842	0.0174	0.0337	0.0061623	GO_bp:go_negative_regulation_of_cell_death
GO_bp:go_positive_regu...	264	0.144	0.0175	0.0577	0.0061715	GO_bp:go_positive_regulation_of_cytoplasmic_transport
GO_bp:go_positive_regu...	398	0.12	0.0177	0.0478	0.0062263	GO_bp:go_positive_regulation_of_nervous_system_development
GO_bp:go_developmental...	540	0.103	0.0178	0.0415	0.0063187	GO_bp:go_developmental_process_involved_in_reproduction
GO_bp:go_positive_regu...	278	0.14	0.0174	0.0562	0.0063388	GO_bp:go_positive_regulation_of_neuron_differentiation
GO_bp:go_response_to_e...	1355	0.0668	0.0178	0.0268	0.0063861	GO_bp:go_response_to_endogenous_stimulus
GO_bp:go_histone_h3_k4...	30	0.387	0.0159	0.156	0.0064168	GO_bp:go_histone_h3_k4_methylation
GO_mf:go_protein_heter...	420	0.124	0.0189	0.0499	0.0064835	GO_mf:go_protein_heterodimerization_activity
Curated_gene_sets:reac...	7	1.06	0.0211	0.427	0.0064839	Curated_gene_sets:reactome_vegf_ligand_receptor_interactions
GO_bp:go_cell_migratio...	13	0.691	0.0187	0.279	0.0065631	GO_bp:go_cell_migration_involved_in_heart_development
GO_bp:go_positive_regu...	179	0.168	0.0168	0.0679	0.0066018	GO_bp:go_positive_regulation_of_cellular_protein_catabolic_process
Curated_gene_sets:pere...	319	0.129	0.0172	0.0522	0.0067045	Curated_gene_sets:perez_tp63_targets
Curated_gene_sets:kyng...	13	0.663	0.018	0.268	0.0067049	Curated_gene_sets:kyng_environmental_stress_response_not_by_uv_in_ws
Curated_gene_sets:rash...	124	0.208	0.0173	0.0841	0.0067538	Curated_gene_sets:rashi_response_to_ionizing_radiation_2
Curated_gene_sets:brow...	152	0.183	0.0169	0.0741	0.0068229	Curated_gene_sets:brown_myeloid_cell_development_up
GO_bp:go_bone_development	148	0.193	0.0176	0.0783	0.0068922	GO_bp:go_bone_development
Curated_gene_sets:reac...	22	0.473	0.0167	0.192	0.0069485	Curated_gene_sets:reactome_yap1_and_wwtr1_taz_stimulated_gene_expression
GO_bp:go_cellular_resp...	241	0.144	0.0166	0.0584	0.0069883	GO_bp:go_cellular_response_to_abiotic_stimulus
GO_bp:go_regulation_of...	27	0.477	0.0186	0.194	0.0070529	GO_bp:go_regulation_of_heart_morphogenesis
GO_bp:go_ossification	232	0.151	0.0172	0.0617	0.0070781	GO_bp:go_ossification
Curated_gene_sets:reac...	16	0.559	0.0168	0.228	0.0071089	Curated_gene_sets:reactome_chylomicron_mediated_lipid_transport
GO_bp:go_positive_regu...	757	0.0859	0.0174	0.0351	0.0071867	GO_bp:go_positive_regulation_of_cell_differentiation
GO_bp:go_membrane_repo...	14	0.62	0.0174	0.254	0.0073217	GO_bp:go_membrane_repolarization
Curated_gene_sets:reac...	30	0.454	0.0187	0.186	0.0073246	Curated_gene_sets:reactome_post_nmda_receptor_activation_events
GO_bp:go_regulation_of...	100	0.235	0.0177	0.0965	0.0073541	GO_bp:go_regulation_of_osteoblast_differentiation
GO_bp:go_positive_regu...	90	0.237	0.0169	0.0972	0.0073559	GO_bp:go_positive_regulation_of_proteasomal_protein_catabolic_process
Curated_gene_sets:reac...	26	0.44	0.0169	0.181	0.0073926	Curated_gene_sets:reactome_smad2_smad3_smad4_heterotrimer_regulates_transcription
Curated_gene_sets:kim_...	206	0.163	0.0175	0.0669	0.0074055	Curated_gene_sets:kim_wt1_targets_up
GO_bp:go_steroid_hormo...	119	0.218	0.0178	0.0893	0.0074108	GO_bp:go_steroid_hormone_mediated_signaling_pathway
GO_mf:go_lipoprotein_p...	16	0.535	0.0161	0.22	0.007465	GO_mf:go_lipoprotein_particle_receptor_activity
Curated_gene_sets:west...	17	0.527	0.0163	0.217	0.0075031	Curated_gene_sets:west_adrenocortical_tumor_markers_dn
GO_bp:go_positive_regu...	10	0.705	0.0168	0.29	0.0075198	GO_bp:go_positive_regulation_of_immune_response_to_tumor_cell
GO_bp:go_positive_regu...	10	0.705	0.0168	0.29	0.0075198	GO_bp:go_positive_regulation_of_response_to_tumor_cell
GO_bp:go_cell_fate_com...	214	0.167	0.0183	0.0689	0.0075614	GO_bp:go_cell_fate_commitment
GO_bp:go_regulation_of...	636	0.0923	0.0172	0.0381	0.0076814	GO_bp:go_regulation_of_proteolysis
GO_bp:go_negative_regu...	16	0.547	0.0164	0.226	0.0077123	GO_bp:go_negative_regulation_of_gene_silencing
GO_bp:go_positive_regu...	373	0.121	0.0174	0.05	0.0077643	GO_bp:go_positive_regulation_of_cellular_component_biogenesis
GO_bp:go_regulation_of...	393	0.122	0.018	0.0504	0.00777	GO_bp:go_regulation_of_transmembrane_transport
GO_bp:go_positive_regu...	367	0.119	0.017	0.0492	0.007786	GO_bp:go_positive_regulation_of_catabolic_process
Curated_gene_sets:li_w...	30	0.431	0.0177	0.178	0.00779	Curated_gene_sets:li_wilms_tumor_vs_fetal_kidney_2_up
GO_mf:go_thyroid_hormo...	27	0.381	0.0149	0.157	0.0077941	GO_mf:go_thyroid_hormone_receptor_binding
GO_bp:go_t_helper_1_ty...	19	0.487	0.016	0.202	0.0078052	GO_bp:go_t_helper_1_type_immune_response
GO_bp:go_response_to_a...	953	0.0753	0.017	0.0312	0.0078097	GO_bp:go_response_to_abiotic_stimulus
GO_bp:go_negative_regu...	146	0.197	0.0178	0.0814	0.0078471	GO_bp:go_negative_regulation_of_cellular_catabolic_process
GO_bp:go_positive_regu...	26	0.449	0.0172	0.186	0.0079219	GO_bp:go_positive_regulation_of_b_cell_mediated_immunity
GO_bp:go_positive_regu...	26	0.449	0.0172	0.186	0.0079219	GO_bp:go_positive_regulation_of_immunoglobulin_mediated_immune_response
Curated_gene_sets:kork...	27	0.42	0.0164	0.174	0.0079329	Curated_gene_sets:korkola_correlated_with_pou5f1
Curated_gene_sets:past...	5	1.03	0.0173	0.428	0.0080634	Curated_gene_sets:pastural_riz1_targets_dn
GO_bp:go_regulation_of...	156	0.178	0.0166	0.074	0.0081114	GO_bp:go_regulation_of_nuclear_division
Curated_gene_sets:mikk...	39	0.385	0.0181	0.16	0.0081565	Curated_gene_sets:mikkelsen_es_hcp_with_h3k27me3
GO_bp:go_cardiovascula...	729	0.0867	0.0172	0.0362	0.008255	GO_bp:go_cardiovascular_system_development
GO_bp:go_circulatory_s...	729	0.0867	0.0172	0.0362	0.008255	GO_bp:go_circulatory_system_development
GO_cc:go_mll1_2_complex	24	0.432	0.0159	0.18	0.0082954	GO_cc:go_mll1_2_complex
GO_cc:go_histone_deace...	51	0.319	0.0171	0.133	0.0083838	GO_cc:go_histone_deacetylase_complex
Curated_gene_sets:pid_...	41	0.332	0.016	0.139	0.0084077	Curated_gene_sets:pid_amb2_neutrophils_pathway
GO_bp:go_positive_regu...	16	0.605	0.0182	0.254	0.0085155	GO_bp:go_positive_regulation_of_potassium_ion_transmembrane_transporter_activity
Curated_gene_sets:reac...	10	0.783	0.0186	0.328	0.0085978	Curated_gene_sets:reactome_regulated_proteolysis_of_p75ntr
GO_bp:go_glandular_epi...	38	0.373	0.0173	0.157	0.0087176	GO_bp:go_glandular_epithelial_cell_differentiation
GO_mf:go_annealing_act...	8	0.713	0.0152	0.3	0.0087637	GO_mf:go_annealing_activity
GO_cc:go_neuron_projec...	864	0.0798	0.0172	0.0336	0.0088026	GO_cc:go_neuron_projection
GO_bp:go_regulation_of...	34	0.368	0.0161	0.155	0.0088107	GO_bp:go_regulation_of_natural_killer_cell_mediated_immunity
GO_bp:go_regulation_of...	943	0.0762	0.0171	0.0321	0.0088121	GO_bp:go_regulation_of_anatomical_structure_morphogenesis
Curated_gene_sets:kegg...	44	0.347	0.0173	0.146	0.0088448	Curated_gene_sets:kegg_notch_signaling_pathway
Curated_gene_sets:peng...	185	0.161	0.0163	0.0677	0.0089089	Curated_gene_sets:peng_rapamycin_response_up
Curated_gene_sets:lin_...	65	0.268	0.0162	0.113	0.0089136	Curated_gene_sets:lin_npas4_targets_dn
GO_bp:go_response_to_uv	121	0.193	0.0159	0.0817	0.0089655	GO_bp:go_response_to_uv
Curated_gene_sets:reac...	13	0.675	0.0183	0.285	0.0089734	Curated_gene_sets:reactome_unblocking_of_nmda_receptor_glutamate_binding_and_activation
GO_bp:go_positive_regu...	15	0.63	0.0183	0.266	0.0090179	GO_bp:go_positive_regulation_of_sequestering_of_calcium_ion
Curated_gene_sets:niko...	5	1.42	0.0239	0.601	0.0090631	Curated_gene_sets:nikolsky_breast_cancer_19p13_amplicon
Curated_gene_sets:kyng...	51	0.326	0.0175	0.138	0.0090658	Curated_gene_sets:kyng_environmental_stress_response_up
GO_bp:go_regulation_of...	103	0.212	0.0161	0.0899	0.0091361	GO_bp:go_regulation_of_dendrite_development
GO_bp:go_positive_regu...	1066	0.0694	0.0165	0.0294	0.0091388	GO_bp:go_positive_regulation_of_cellular_component_organization
Curated_gene_sets:tian...	26	0.461	0.0177	0.195	0.0091419	Curated_gene_sets:tian_tnf_signaling_via_nfkb
Curated_gene_sets:waes...	12	0.529	0.0138	0.224	0.0091526	Curated_gene_sets:waesch_anaphase_promoting_complex
GO_bp:go_regulation_of...	12	0.633	0.0165	0.268	0.0091698	GO_bp:go_regulation_of_immune_response_to_tumor_cell
GO_bp:go_regulation_of...	12	0.633	0.0165	0.268	0.0091698	GO_bp:go_regulation_of_response_to_tumor_cell
Curated_gene_sets:welc...	20	0.556	0.0187	0.236	0.0092249	Curated_gene_sets:welch_gata1_targets
GO_bp:go_blood_vessel_...	338	0.123	0.0168	0.052	0.0092801	GO_bp:go_blood_vessel_morphogenesis
GO_mf:go_core_promoter...	97	0.221	0.0163	0.0938	0.0094024	GO_mf:go_core_promoter_sequence_specific_dna_binding
Curated_gene_sets:acev...	338	0.114	0.0156	0.0486	0.0094126	Curated_gene_sets:acevedo_normal_tissue_adjacent_to_liver_tumor_dn
GO_bp:go_extrinsic_apo...	36	0.398	0.0179	0.17	0.009453	GO_bp:go_extrinsic_apoptotic_signaling_pathway_via_death_domain_receptors
GO_bp:go_positive_regu...	27	0.436	0.017	0.186	0.009489	GO_bp:go_positive_regulation_of_cartilage_development
Curated_gene_sets:bioc...	20	0.453	0.0152	0.193	0.009522	Curated_gene_sets:biocarta_nfkb_pathway
GO_bp:go_quaternary_am...	18	0.554	0.0177	0.237	0.009618	GO_bp:go_quaternary_ammonium_group_transport
GO_bp:go_viral_life_cycle	275	0.133	0.0165	0.0569	0.009632	GO_bp:go_viral_life_cycle
Curated_gene_sets:will...	6	0.842	0.0155	0.36	0.0096772	Curated_gene_sets:williams_esr1_targets_dn
Curated_gene_sets:pid_...	44	0.34	0.0169	0.145	0.0096967	Curated_gene_sets:pid_delta_np63_pathway
Curated_gene_sets:kyng...	183	0.163	0.0165	0.0699	0.009825	Curated_gene_sets:kyng_dna_damage_dn
Curated_gene_sets:marc...	48	0.309	0.0161	0.132	0.0098365	Curated_gene_sets:marchini_trabectedin_resistance_dn
GO_bp:go_positive_regu...	38	0.345	0.016	0.148	0.0098532	GO_bp:go_positive_regulation_of_cell_matrix_adhesion
Curated_gene_sets:reac...	35	0.368	0.0164	0.158	0.0098834	Curated_gene_sets:reactome_transcriptional_activity_of_smad2_smad3_smad4_heterotrimer
GO_bp:go_regulation_of...	9	0.653	0.0147	0.28	0.0098953	GO_bp:go_regulation_of_nlrp3_inflammasome_complex_assembly
GO_bp:go_positive_regu...	35	0.407	0.0181	0.175	0.0099551	GO_bp:go_positive_regulation_of_biomineral_tissue_development
Curated_gene_sets:puja...	92	0.215	0.0155	0.0925	0.010004	Curated_gene_sets:pujana_breast_cancer_lit_int_network
GO_bp:go_regulation_of...	159	0.179	0.0168	0.0768	0.010073	GO_bp:go_regulation_of_cell_substrate_adhesion
Curated_gene_sets:gary...	428	0.101	0.0156	0.0436	0.010103	Curated_gene_sets:gary_cd5_targets_up
Curated_gene_sets:reac...	10	0.807	0.0192	0.348	0.010131	Curated_gene_sets:reactome_notch_hlh_transcription_pathway
GO_bp:go_enteroendocri...	19	0.545	0.0178	0.235	0.010305	GO_bp:go_enteroendocrine_cell_differentiation
GO_bp:go_cellular_resp...	64	0.254	0.0152	0.11	0.01034	GO_bp:go_cellular_response_to_uv
GO_bp:go_organ_growth	61	0.301	0.0176	0.13	0.010361	GO_bp:go_organ_growth
GO_bp:go_response_to_o...	864	0.0765	0.0165	0.0331	0.01048	GO_bp:go_response_to_organic_cyclic_compound
GO_cc:go_nuclear_speck	180	0.157	0.0157	0.068	0.010506	GO_cc:go_nuclear_speck
GO_cc:go_chromosomal_r...	310	0.121	0.0158	0.0523	0.010524	GO_cc:go_chromosomal_region
GO_bp:go_negative_regu...	1248	0.0639	0.0164	0.0277	0.010544	GO_bp:go_negative_regulation_of_response_to_stimulus
GO_bp:go_negative_regu...	28	0.441	0.0175	0.191	0.010584	GO_bp:go_negative_regulation_of_receptor_activity
GO_bp:go_activation_of...	11	0.652	0.0162	0.283	0.010584	GO_bp:go_activation_of_mapkkk_activity
GO_bp:go_regulation_of...	111	0.21	0.0166	0.0913	0.010653	GO_bp:go_regulation_of_stem_cell_differentiation
GO_cc:go_golgi_apparatus	1318	0.0619	0.0162	0.0269	0.010739	GO_cc:go_golgi_apparatus
GO_bp:go_regulation_of...	20	0.523	0.0176	0.227	0.010745	GO_bp:go_regulation_of_receptor_biosynthetic_process
Curated_gene_sets:pid_...	16	0.562	0.0169	0.244	0.010783	Curated_gene_sets:pid_syndecan_3_pathway
Curated_gene_sets:yang...	5	0.913	0.0153	0.398	0.010838	Curated_gene_sets:yang_muc2_targets_colon_3mo_dn
Curated_gene_sets:plas...	31	0.37	0.0155	0.161	0.010883	Curated_gene_sets:plasari_tgfb1_targets_1hr_up
GO_bp:go_regulation_of...	97	0.233	0.0172	0.102	0.010973	GO_bp:go_regulation_of_muscle_organ_development
GO_bp:go_cell_prolifer...	628	0.088	0.0163	0.0385	0.011068	GO_bp:go_cell_proliferation
Curated_gene_sets:bioc...	28	0.419	0.0167	0.183	0.011103	Curated_gene_sets:biocarta_hdac_pathway
GO_mf:go_low_density_l...	13	0.537	0.0146	0.235	0.011136	GO_mf:go_low_density_lipoprotein_receptor_activity
GO_bp:go_mechanorecept...	49	0.326	0.0171	0.143	0.01115	GO_bp:go_mechanoreceptor_differentiation
GO_bp:go_branch_elonga...	18	0.625	0.0199	0.273	0.011158	GO_bp:go_branch_elongation_of_an_epithelium
Curated_gene_sets:clas...	20	0.489	0.0164	0.214	0.011181	Curated_gene_sets:clasper_lymphatic_vessels_during_metastasis_up
GO_bp:go_regulation_of...	15	0.582	0.0169	0.255	0.011203	GO_bp:go_regulation_of_spindle_assembly
GO_bp:go_regulation_of...	167	0.166	0.0161	0.0728	0.011245	GO_bp:go_regulation_of_proteasomal_protein_catabolic_process
GO_bp:go_male_gamete_g...	416	0.103	0.0156	0.0454	0.011443	GO_bp:go_male_gamete_generation
Curated_gene_sets:krie...	47	0.303	0.0156	0.133	0.011446	Curated_gene_sets:krieg_hypoxia_via_kdm3a
GO_bp:go_photoperiodism	23	0.418	0.0151	0.184	0.011488	GO_bp:go_photoperiodism
GO_bp:go_negative_regu...	190	0.162	0.0167	0.0713	0.011556	GO_bp:go_negative_regulation_of_catabolic_process
GO_bp:go_negative_regu...	15	0.588	0.0171	0.259	0.011599	GO_bp:go_negative_regulation_of_telomerase_activity
GO_mf:go_ammonium_ion_...	60	0.293	0.0171	0.129	0.01175	GO_mf:go_ammonium_ion_binding
Curated_gene_sets:gazd...	38	0.345	0.016	0.152	0.011759	Curated_gene_sets:gazda_diamond_blackfan_anemia_progenitor_up
GO_bp:go_negative_regu...	1090	0.067	0.0161	0.0296	0.011803	GO_bp:go_negative_regulation_of_cell_communication
GO_mf:go_mitogen_activ...	25	0.444	0.0167	0.196	0.011882	GO_mf:go_mitogen_activated_protein_kinase_binding
GO_bp:go_endosome_to_l...	37	0.362	0.0165	0.16	0.011892	GO_bp:go_endosome_to_lysosome_transport
Curated_gene_sets:zwan...	189	0.157	0.0162	0.0695	0.011893	Curated_gene_sets:zwang_egf_interval_dn
GO_bp:go_regulation_of...	46	0.326	0.0166	0.144	0.011899	GO_bp:go_regulation_of_gene_silencing
GO_cc:go_nuclear_body	316	0.116	0.0153	0.0511	0.011906	GO_cc:go_nuclear_body
GO_bp:go_regulation_of...	526	0.092	0.0156	0.0407	0.011964	GO_bp:go_regulation_of_cell_cycle_process
GO_bp:go_cytokine_secr...	37	0.354	0.0162	0.157	0.012024	GO_bp:go_cytokine_secretion
Curated_gene_sets:xu_h...	32	0.374	0.0159	0.166	0.012042	Curated_gene_sets:xu_hgf_signaling_not_via_akt1_48hr_up
GO_bp:go_regulation_of...	140	0.181	0.0161	0.0804	0.012107	GO_bp:go_regulation_of_chromatin_organization
GO_bp:go_regulation_of...	62	0.265	0.0157	0.118	0.012165	GO_bp:go_regulation_of_sister_chromatid_segregation
GO_bp:go_organelle_inh...	9	0.762	0.0172	0.339	0.012292	GO_bp:go_organelle_inheritance
Curated_gene_sets:hosh...	65	0.26	0.0157	0.116	0.012433	Curated_gene_sets:hoshida_liver_cancer_late_recurrence_dn
Curated_gene_sets:oxfo...	8	0.861	0.0183	0.384	0.012471	Curated_gene_sets:oxford_rala_and_ralb_targets_dn
Curated_gene_sets:lee_...	47	0.294	0.0151	0.131	0.012483	Curated_gene_sets:lee_calorie_restriction_muscle_dn
Curated_gene_sets:wu_h...	18	0.548	0.0175	0.245	0.012598	Curated_gene_sets:wu_hbx_targets_3_up
Curated_gene_sets:bioc...	9	0.705	0.0159	0.315	0.012701	Curated_gene_sets:biocarta_free_pathway
GO_bp:go_negative_regu...	28	0.426	0.0169	0.191	0.012782	GO_bp:go_negative_regulation_of_calcium_ion_transmembrane_transport
GO_bp:go_positive_regu...	941	0.0722	0.0162	0.0324	0.012866	GO_bp:go_positive_regulation_of_transcription_from_rna_polymerase_ii_promoter
Curated_gene_sets:wott...	20	0.486	0.0163	0.218	0.012896	Curated_gene_sets:wotton_runx_targets_up
GO_bp:go_adherens_junc...	32	0.374	0.0159	0.168	0.012905	GO_bp:go_adherens_junction_assembly
GO_bp:go_cell_growth	124	0.198	0.0165	0.0891	0.013167	GO_bp:go_cell_growth
Curated_gene_sets:amit...	161	0.17	0.0161	0.0764	0.013221	Curated_gene_sets:amit_egf_response_480_hela
GO_bp:go_artery_morpho...	48	0.308	0.016	0.139	0.013248	GO_bp:go_artery_morphogenesis
Curated_gene_sets:wang...	8	0.758	0.0161	0.342	0.013299	Curated_gene_sets:wang_response_to_forskolin_dn
Curated_gene_sets:reac...	24	0.456	0.0168	0.205	0.013302	Curated_gene_sets:reactome_creb_phosphorylation_through_the_activation_of_ras
GO_bp:go_cell_cycle	1229	0.0603	0.0153	0.0272	0.013305	GO_bp:go_cell_cycle
GO_bp:go_regulation_of...	26	0.381	0.0146	0.172	0.013334	GO_bp:go_regulation_of_vacuolar_transport
Curated_gene_sets:caso...	152	0.177	0.0164	0.0799	0.013339	Curated_gene_sets:casorelli_acute_promyelocytic_leukemia_up
GO_bp:go_chromatin_org...	579	0.0884	0.0157	0.0399	0.013447	GO_bp:go_chromatin_organization
Curated_gene_sets:toml...	19	0.511	0.0167	0.231	0.013502	Curated_gene_sets:tomlins_metastasis_dn
Curated_gene_sets:hosh...	110	0.198	0.0156	0.0895	0.013518	Curated_gene_sets:hoshida_liver_cancer_subclass_s2
GO_bp:go_endocrine_sys...	117	0.193	0.0157	0.0874	0.013557	GO_bp:go_endocrine_system_development
Curated_gene_sets:zhan...	28	0.371	0.0148	0.168	0.013634	Curated_gene_sets:zhan_late_differentiation_genes_up
Curated_gene_sets:reac...	11	0.566	0.0141	0.257	0.013758	Curated_gene_sets:reactome_receptor_ligand_binding_initiates_the_second_proteolytic_cleavage_of_notch_receptor
GO_cc:go_postsynapse	340	0.12	0.0164	0.0543	0.013827	GO_cc:go_postsynapse
GO_bp:go_dna_methylation	43	0.313	0.0154	0.142	0.014035	GO_bp:go_dna_methylation
GO_bp:go_dna_alkylation	43	0.313	0.0154	0.142	0.014035	GO_bp:go_dna_alkylation
Curated_gene_sets:bioc...	14	0.534	0.015	0.244	0.014118	Curated_gene_sets:biocarta_rankl_pathway
GO_bp:go_negative_regu...	50	0.282	0.015	0.129	0.014184	GO_bp:go_negative_regulation_of_dna_replication
Curated_gene_sets:smid...	124	0.188	0.0157	0.0857	0.014191	Curated_gene_sets:smid_breast_cancer_erbb2_up
GO_bp:go_positive_regu...	45	0.313	0.0157	0.143	0.01421	GO_bp:go_positive_regulation_of_chemokine_production
GO_bp:go_negative_regu...	23	0.412	0.0149	0.188	0.014218	GO_bp:go_negative_regulation_of_intrinsic_apoptotic_signaling_pathway_in_response_to_dna_damage
GO_bp:go_negative_regu...	16	0.47	0.0141	0.215	0.014392	GO_bp:go_negative_regulation_of_receptor_mediated_endocytosis
GO_bp:go_positive_regu...	1289	0.0601	0.0156	0.0275	0.014395	GO_bp:go_positive_regulation_of_multicellular_organismal_process
GO_mf:go_transcription...	23	0.469	0.0169	0.215	0.014469	GO_mf:go_transcription_cofactor_binding
GO_bp:go_negative_regu...	60	0.278	0.0162	0.127	0.014518	GO_bp:go_negative_regulation_of_cellular_protein_catabolic_process
GO_bp:go_regulation_of...	19	0.439	0.0144	0.201	0.014605	GO_bp:go_regulation_of_gene_silencing_by_rna
GO_bp:go_regulation_of...	19	0.439	0.0144	0.201	0.014605	GO_bp:go_regulation_of_posttranscriptional_gene_silencing
Curated_gene_sets:guil...	49	0.311	0.0164	0.143	0.014615	Curated_gene_sets:guillaumond_klf10_targets_up
GO_bp:go_regulation_of...	442	0.0965	0.0151	0.0443	0.01468	GO_bp:go_regulation_of_mitotic_cell_cycle
Curated_gene_sets:reac...	12	0.644	0.0168	0.296	0.014714	Curated_gene_sets:reactome_signaling_by_notch2
GO_bp:go_modulation_by...	36	0.332	0.015	0.153	0.01483	GO_bp:go_modulation_by_virus_of_host_morphology_or_physiology
Curated_gene_sets:dang...	1020	0.0637	0.0148	0.0293	0.014845	Curated_gene_sets:dang_bound_by_myc
GO_bp:go_regulation_of...	477	0.0977	0.0158	0.0449	0.01487	GO_bp:go_regulation_of_system_process
Curated_gene_sets:pid_...	27	0.419	0.0163	0.193	0.014871	Curated_gene_sets:pid_igf1_pathway
GO_bp:go_positive_regu...	136	0.177	0.0154	0.0813	0.014886	GO_bp:go_positive_regulation_of_cell_growth
GO_bp:go_positive_regu...	336	0.111	0.0151	0.051	0.014891	GO_bp:go_positive_regulation_of_proteolysis
GO_mf:go_ligase_regula...	14	0.615	0.0173	0.283	0.015019	GO_mf:go_ligase_regulator_activity
Curated_gene_sets:brow...	153	0.169	0.0156	0.0777	0.015048	Curated_gene_sets:browne_hcmv_infection_6hr_dn
GO_bp:go_pancreas_deve...	70	0.253	0.0159	0.117	0.015217	GO_bp:go_pancreas_development
GO_bp:go_regulation_of...	28	0.399	0.0159	0.185	0.015239	GO_bp:go_regulation_of_endoplasmic_reticulum_stress_induced_intrinsic_apoptotic_signaling_pathway
GO_cc:go_synapse_part	557	0.0914	0.016	0.0423	0.015276	GO_cc:go_synapse_part
GO_bp:go_regulation_of...	160	0.165	0.0156	0.0763	0.015297	GO_bp:go_regulation_of_ossification
GO_bp:go_cellular_resp...	84	0.209	0.0144	0.0967	0.015309	GO_bp:go_cellular_response_to_light_stimulus
GO_mf:go_transcription...	478	0.0964	0.0156	0.0447	0.015417	GO_mf:go_transcription_factor_binding
GO_bp:go_positive_regu...	17	0.49	0.0152	0.227	0.015424	GO_bp:go_positive_regulation_of_chondrocyte_differentiation
GO_bp:go_intracellular...	157	0.165	0.0155	0.0764	0.015444	GO_bp:go_intracellular_receptor_signaling_pathway
Curated_gene_sets:schl...	27	0.397	0.0155	0.184	0.015467	Curated_gene_sets:schlingemann_skin_carcinogenesis_tpa_dn
GO_mf:go_steroid_hormo...	56	0.288	0.0162	0.134	0.015539	GO_mf:go_steroid_hormone_receptor_activity
Curated_gene_sets:vart...	127	0.18	0.0152	0.0836	0.015555	Curated_gene_sets:vart_kshv_infection_angiogenic_markers_dn
GO_bp:go_regulation_of...	16	0.515	0.0155	0.239	0.015633	GO_bp:go_regulation_of_skeletal_muscle_cell_differentiation
GO_bp:go_regulation_of...	17	0.458	0.0142	0.212	0.015657	GO_bp:go_regulation_of_ubiquitin_protein_ligase_activity
GO_bp:go_positive_regu...	13	0.51	0.0138	0.237	0.015675	GO_bp:go_positive_regulation_of_vacuolar_transport
GO_bp:go_oocyte_differ...	38	0.337	0.0156	0.156	0.015721	GO_bp:go_oocyte_differentiation
Curated_gene_sets:st_s...	11	0.548	0.0136	0.255	0.015742	Curated_gene_sets:st_stat3_pathway
GO_bp:go_t_cell_lineag...	14	0.523	0.0147	0.243	0.015834	GO_bp:go_t_cell_lineage_commitment
GO_bp:go_regulation_of...	44	0.309	0.0154	0.144	0.01598	GO_bp:go_regulation_of_vasodilation
GO_bp:go_regulation_of...	511	0.0914	0.0153	0.0426	0.016063	GO_bp:go_regulation_of_cell_projection_organization
GO_bp:go_modulation_of...	27	0.401	0.0156	0.187	0.016162	GO_bp:go_modulation_of_excitatory_postsynaptic_potential
GO_bp:go_regulation_of...	257	0.125	0.015	0.0586	0.016243	GO_bp:go_regulation_of_chromosome_organization
GO_bp:go_positive_regu...	26	0.427	0.0164	0.2	0.016262	GO_bp:go_positive_regulation_of_potassium_ion_transmembrane_transport
GO_bp:go_negative_regu...	18	0.525	0.0167	0.246	0.016415	GO_bp:go_negative_regulation_of_mrna_splicing_via_spliceosome
Curated_gene_sets:verr...	37	0.32	0.0146	0.15	0.016477	Curated_gene_sets:verrecchia_delayed_response_to_tgfb1
GO_bp:go_ventricular_c...	44	0.33	0.0164	0.155	0.016534	GO_bp:go_ventricular_cardiac_muscle_tissue_development
GO_bp:go_regulation_of...	44	0.292	0.0146	0.137	0.016539	GO_bp:go_regulation_of_extrinsic_apoptotic_signaling_pathway_in_absence_of_ligand
GO_bp:go_entrainment_o...	25	0.402	0.0151	0.189	0.016648	GO_bp:go_entrainment_of_circadian_clock
Curated_gene_sets:bioc...	17	0.569	0.0176	0.268	0.016797	Curated_gene_sets:biocarta_tel_pathway
Curated_gene_sets:hofm...	36	0.358	0.0162	0.169	0.016799	Curated_gene_sets:hofmann_cell_lymphoma_dn
GO_bp:go_vitamin_d_met...	11	0.658	0.0164	0.31	0.016863	GO_bp:go_vitamin_d_metabolic_process
GO_bp:go_negative_regu...	91	0.205	0.0147	0.0966	0.01695	GO_bp:go_negative_regulation_of_extrinsic_apoptotic_signaling_pathway
GO_bp:go_regulation_of...	25	0.419	0.0157	0.198	0.016998	GO_bp:go_regulation_of_ryanodine_sensitive_calcium_release_channel_activity
GO_bp:go_cellular_resp...	12	0.638	0.0166	0.301	0.01701	GO_bp:go_cellular_response_to_hepatocyte_growth_factor_stimulus
GO_bp:go_response_to_h...	12	0.638	0.0166	0.301	0.01701	GO_bp:go_response_to_hepatocyte_growth_factor
GO_bp:go_positive_regu...	199	0.14	0.0148	0.0662	0.017025	GO_bp:go_positive_regulation_of_homeostatic_process
Curated_gene_sets:boqu...	208	0.144	0.0155	0.068	0.017085	Curated_gene_sets:boquest_stem_cell_dn
GO_mf:go_structure_spe...	106	0.187	0.0144	0.0882	0.017112	GO_mf:go_structure_specific_dna_binding
GO_bp:go_positive_regu...	30	0.342	0.0141	0.162	0.01722	GO_bp:go_positive_regulation_of_dendritic_spine_development
GO_bp:go_cellular_sene...	30	0.362	0.0149	0.171	0.017229	GO_bp:go_cellular_senescence
GO_bp:go_protein_local...	43	0.304	0.015	0.144	0.017246	GO_bp:go_protein_localization_to_chromosome
GO_bp:go_regulation_of...	1575	0.0529	0.0151	0.025	0.017312	GO_bp:go_regulation_of_protein_modification_process
GO_bp:go_regulation_of...	20	0.456	0.0153	0.216	0.017314	GO_bp:go_regulation_of_spindle_organization
GO_mf:go_vitamin_d_rec...	15	0.454	0.0132	0.215	0.017419	GO_mf:go_vitamin_d_receptor_binding
GO_bp:go_regulation_of...	29	0.44	0.0178	0.209	0.017427	GO_bp:go_regulation_of_retinoic_acid_receptor_signaling_pathway
Curated_gene_sets:reac...	16	0.53	0.0159	0.252	0.017487	Curated_gene_sets:reactome_ras_activation_uopn_ca2_infux_through_nmda_receptor
GO_bp:go_regulation_of...	140	0.173	0.0154	0.0823	0.017518	GO_bp:go_regulation_of_cell_projection_assembly
GO_bp:go_dna_dependent...	21	0.383	0.0132	0.182	0.017584	GO_bp:go_dna_dependent_dna_replication_maintenance_of_fidelity
GO_bp:go_regulation_of...	329	0.106	0.0144	0.0505	0.017634	GO_bp:go_regulation_of_apoptotic_signaling_pathway
GO_mf:go_transcription...	45	0.319	0.0161	0.152	0.017707	GO_mf:go_transcription_factor_activity_direct_ligand_regulated_sequence_specific_dna_binding
GO_bp:go_craniofacial_...	14	0.601	0.0169	0.286	0.017806	GO_bp:go_craniofacial_suture_morphogenesis
Curated_gene_sets:zhan...	35	0.34	0.0151	0.162	0.017812	Curated_gene_sets:zhan_multiple_myeloma_lb_dn
GO_bp:go_regulation_of...	15	0.512	0.0149	0.243	0.017818	GO_bp:go_regulation_of_inclusion_body_assembly
Curated_gene_sets:dela...	44	0.318	0.0159	0.152	0.018032	Curated_gene_sets:delacroix_rar_targets_up
Curated_gene_sets:reac...	20	0.442	0.0149	0.211	0.018168	Curated_gene_sets:reactome_ptm_gamma_carboxylation_hypusine_formation_and_arylsulfatase_activation
GO_bp:go_protein_dna_c...	197	0.146	0.0153	0.0698	0.018222	GO_bp:go_protein_dna_complex_subunit_organization
Curated_gene_sets:scha...	5	1.08	0.0182	0.517	0.01823	Curated_gene_sets:schaeffer_prostate_development_and_cancer_box3
Curated_gene_sets:reac...	10	0.571	0.0136	0.273	0.018325	Curated_gene_sets:reactome_il_6_signaling
GO_bp:go_negative_regu...	22	0.456	0.0161	0.218	0.018343	GO_bp:go_negative_regulation_of_cytokine_biosynthetic_process
GO_cc:go_synapse	688	0.0793	0.0153	0.038	0.018382	GO_cc:go_synapse
GO_bp:go_dna_modification	75	0.239	0.0155	0.114	0.018394	GO_bp:go_dna_modification
GO_bp:go_negative_regu...	18	0.51	0.0163	0.244	0.018408	GO_bp:go_negative_regulation_of_calcium_ion_transport_into_cytosol
Curated_gene_sets:dutt...	31	0.367	0.0153	0.176	0.018413	Curated_gene_sets:dutta_apoptosis_via_nfkb
GO_bp:go_cartilage_dev...	18	0.501	0.016	0.24	0.018469	GO_bp:go_cartilage_development_involved_in_endochondral_bone_morphogenesis
GO_bp:go_regulation_of...	100	0.206	0.0154	0.0985	0.018486	GO_bp:go_regulation_of_fat_cell_differentiation
GO_cc:go_endoplasmic_r...	1064	0.0623	0.0148	0.0299	0.01849	GO_cc:go_endoplasmic_reticulum_part
GO_bp:go_regulation_of...	276	0.123	0.0153	0.0591	0.01855	GO_bp:go_regulation_of_blood_circulation
GO_cc:go_presynaptic_a...	27	0.429	0.0167	0.206	0.01855	GO_cc:go_presynaptic_active_zone
GO_bp:go_cranial_nerve...	41	0.312	0.015	0.15	0.018565	GO_bp:go_cranial_nerve_development
Curated_gene_sets:west...	483	0.0919	0.015	0.0441	0.018682	Curated_gene_sets:west_adrenocortical_tumor_dn
Curated_gene_sets:dors...	28	0.405	0.0161	0.195	0.018718	Curated_gene_sets:dorsey_gab2_targets
GO_cc:go_intrinsic_com...	1494	0.0557	0.0155	0.0268	0.018773	GO_cc:go_intrinsic_component_of_plasma_membrane
GO_cc:go_pore_complex	17	0.502	0.0156	0.241	0.018831	GO_cc:go_pore_complex
Curated_gene_sets:brow...	163	0.151	0.0144	0.0728	0.018966	Curated_gene_sets:browne_hcmv_infection_48hr_up
GO_bp:go_positive_regu...	91	0.208	0.0149	0.1	0.01902	GO_bp:go_positive_regulation_of_transmembrane_receptor_protein_serine_threonine_kinase_signaling_pathway
GO_bp:go_cellular_resp...	441	0.0946	0.0148	0.0456	0.019064	GO_bp:go_cellular_response_to_organic_cyclic_compound
GO_bp:go_biomineral_ti...	70	0.241	0.0151	0.116	0.019118	GO_bp:go_biomineral_tissue_development
GO_bp:go_telencephalon...	212	0.14	0.0152	0.0675	0.019129	GO_bp:go_telencephalon_development
GO_bp:go_positive_regu...	15	0.496	0.0144	0.24	0.019207	GO_bp:go_positive_regulation_of_mast_cell_activation
Curated_gene_sets:dela...	354	0.104	0.0145	0.0501	0.019259	Curated_gene_sets:delacroix_rarg_bound_mef
GO_bp:go_renal_vesicle...	14	0.55	0.0155	0.266	0.019414	GO_bp:go_renal_vesicle_development
GO_bp:go_cell_substrat...	157	0.155	0.0145	0.0751	0.019494	GO_bp:go_cell_substrate_adhesion
GO_bp:go_negative_regu...	34	0.363	0.0159	0.176	0.019551	GO_bp:go_negative_regulation_of_epithelial_cell_apoptotic_process
Curated_gene_sets:mart...	430	0.0933	0.0144	0.0453	0.019734	Curated_gene_sets:martens_bound_by_pml_rara_fusion
GO_bp:go_low_density_l...	11	0.538	0.0134	0.261	0.019771	GO_bp:go_low_density_lipoprotein_particle_remodeling
GO_mf:go_ion_channel_b...	102	0.204	0.0154	0.0992	0.019868	GO_mf:go_ion_channel_binding
Curated_gene_sets:kaab...	229	0.13	0.0147	0.0631	0.019941	Curated_gene_sets:kaab_heart_atrium_vs_ventricle_up
Curated_gene_sets:alfa...	230	0.125	0.0142	0.061	0.020019	Curated_gene_sets:alfano_myc_targets
GO_bp:go_regulation_of...	681	0.0753	0.0145	0.0367	0.020021	GO_bp:go_regulation_of_catabolic_process
Curated_gene_sets:pati...	680	0.074	0.0142	0.036	0.020048	Curated_gene_sets:patil_liver_cancer
Curated_gene_sets:purb...	306	0.108	0.0141	0.0526	0.020105	Curated_gene_sets:purbey_targets_of_ctbp1_not_satb1_up
GO_bp:go_steroid_metab...	223	0.131	0.0147	0.064	0.020115	GO_bp:go_steroid_metabolic_process
GO_cc:go_membrane_prot...	942	0.0657	0.0148	0.032	0.020145	GO_cc:go_membrane_protein_complex
GO_bp:go_negative_regu...	24	0.446	0.0164	0.217	0.020176	GO_bp:go_negative_regulation_of_rna_splicing
GO_bp:go_regulation_of...	254	0.12	0.0143	0.0586	0.020182	GO_bp:go_regulation_of_cell_division
GO_bp:go_nuclear_export	132	0.154	0.0133	0.0752	0.02027	GO_bp:go_nuclear_export
GO_bp:go_multi_multice...	195	0.139	0.0145	0.0679	0.020278	GO_bp:go_multi_multicellular_organism_process
Curated_gene_sets:reac...	13	0.526	0.0142	0.257	0.020285	Curated_gene_sets:reactome_nrif_signals_cell_death_from_the_nucleus
GO_mf:go_store_operate...	10	0.678	0.0161	0.331	0.020321	GO_mf:go_store_operated_calcium_channel_activity
GO_bp:go_positive_regu...	38	0.274	0.0127	0.134	0.02033	GO_bp:go_positive_regulation_of_cell_killing
GO_mf:go_cation_channe...	273	0.122	0.015	0.0597	0.020412	GO_mf:go_cation_channel_activity
GO_bp:go_positive_t_ce...	19	0.451	0.0148	0.221	0.020418	GO_bp:go_positive_t_cell_selection
GO_bp:go_behavior	480	0.091	0.0148	0.0445	0.020425	GO_bp:go_behavior
GO_bp:go_microtubule_a...	17	0.483	0.015	0.236	0.020528	GO_bp:go_microtubule_anchoring
GO_bp:go_positive_regu...	56	0.247	0.0139	0.121	0.020562	GO_bp:go_positive_regulation_of_smooth_muscle_cell_proliferation
GO_cc:go_chromosome	817	0.0682	0.0143	0.0335	0.020747	GO_cc:go_chromosome
Curated_gene_sets:kim_...	80	0.216	0.0145	0.106	0.020766	Curated_gene_sets:kim_glis2_targets_up
Curated_gene_sets:chia...	22	0.416	0.0147	0.204	0.020797	Curated_gene_sets:chiang_liver_cancer_subclass_interferon_up
GO_bp:go_regulation_of...	96	0.209	0.0153	0.103	0.020861	GO_bp:go_regulation_of_muscle_tissue_development
Curated_gene_sets:mart...	38	0.318	0.0147	0.156	0.020862	Curated_gene_sets:martin_interact_with_hdac
GO_bp:go_sterol_homeos...	57	0.246	0.0139	0.121	0.021083	GO_bp:go_sterol_homeostasis
GO_bp:go_cholesterol_h...	57	0.246	0.0139	0.121	0.021083	GO_bp:go_cholesterol_homeostasis
GO_bp:go_reactive_oxyg...	21	0.429	0.0148	0.211	0.021136	GO_bp:go_reactive_oxygen_species_biosynthetic_process
GO_bp:go_specification...	14	0.577	0.0162	0.284	0.021189	GO_bp:go_specification_of_organ_identity
GO_bp:go_modulation_by...	27	0.363	0.0142	0.179	0.021216	GO_bp:go_modulation_by_symbiont_of_host_cellular_process
GO_mf:go_high_voltage_...	10	0.603	0.0143	0.298	0.021333	GO_mf:go_high_voltage_gated_calcium_channel_activity
Curated_gene_sets:nouz...	60	0.254	0.0148	0.126	0.021377	Curated_gene_sets:nouzova_methylated_in_apl
GO_bp:go_regulation_of...	14	0.486	0.0137	0.24	0.021489	GO_bp:go_regulation_of_lipoprotein_particle_clearance
GO_cc:go_cation_channe...	158	0.156	0.0146	0.0771	0.021697	GO_cc:go_cation_channel_complex
GO_mf:go_gated_channel...	287	0.12	0.0151	0.0594	0.021729	GO_mf:go_gated_channel_activity
GO_bp:go_regulation_of...	56	0.253	0.0142	0.125	0.021748	GO_bp:go_regulation_of_pathway_restricted_smad_protein_phosphorylation
Curated_gene_sets:chia...	69	0.221	0.0138	0.109	0.021835	Curated_gene_sets:chiang_liver_cancer_subclass_polysomy7_up
Curated_gene_sets:wags...	12	0.611	0.0159	0.303	0.021967	Curated_gene_sets:wagschal_ehmt2_targets_up
Curated_gene_sets:fost...	199	0.135	0.0143	0.0672	0.021984	Curated_gene_sets:foster_kdm1a_targets_dn
Curated_gene_sets:reac...	24	0.369	0.0136	0.183	0.022049	Curated_gene_sets:reactome_tgf_beta_receptor_signaling_activates_smads
GO_bp:go_dna_catabolic...	17	0.448	0.0139	0.223	0.022107	GO_bp:go_dna_catabolic_process_endonucleolytic
GO_bp:go_kidney_epithe...	117	0.184	0.0149	0.0914	0.022163	GO_bp:go_kidney_epithelium_development
GO_bp:go_tongue_develo...	18	0.471	0.015	0.234	0.022209	GO_bp:go_tongue_development
Curated_gene_sets:matz...	8	0.724	0.0154	0.36	0.022233	Curated_gene_sets:matzuk_luteal_genes
GO_bp:go_mesonephros_d...	85	0.211	0.0146	0.105	0.022258	GO_bp:go_mesonephros_development
GO_bp:go_chromatin_sil...	81	0.238	0.0161	0.119	0.022408	GO_bp:go_chromatin_silencing
Curated_gene_sets:zemb...	16	0.474	0.0143	0.236	0.022452	Curated_gene_sets:zembutsu_sensitivity_to_vincristine
Curated_gene_sets:taka...	9	0.615	0.0139	0.307	0.022535	Curated_gene_sets:takayama_bound_by_ar
GO_cc:go_low_density_l...	13	0.445	0.0121	0.222	0.022576	GO_cc:go_low_density_lipoprotein_particle
GO_cc:go_nuclear_membrane	267	0.118	0.0144	0.0591	0.022783	GO_cc:go_nuclear_membrane
Curated_gene_sets:saka...	33	0.341	0.0147	0.17	0.022807	Curated_gene_sets:sakai_chronic_hepatitis_vs_liver_cancer_dn
Curated_gene_sets:asto...	147	0.151	0.0137	0.0756	0.022807	Curated_gene_sets:aston_major_depressive_disorder_dn
Curated_gene_sets:ouya...	16	0.475	0.0143	0.238	0.022923	Curated_gene_sets:ouyang_prostate_cancer_markers
GO_bp:go_positive_regu...	50	0.268	0.0142	0.134	0.022967	GO_bp:go_positive_regulation_of_calcium_ion_import
Curated_gene_sets:waka...	835	0.0669	0.0142	0.0335	0.02299	Curated_gene_sets:wakabayashi_adipogenesis_pparg_rxra_bound_8d
GO_bp:go_vesicle_media...	19	0.464	0.0152	0.233	0.02305	GO_bp:go_vesicle_mediated_transport_between_endosomal_compartments
Curated_gene_sets:dasu...	58	0.247	0.0141	0.124	0.023134	Curated_gene_sets:dasu_il6_signaling_up
GO_bp:go_apoptotic_nuc...	23	0.405	0.0146	0.204	0.023203	GO_bp:go_apoptotic_nuclear_changes
GO_bp:go_coenzyme_bios...	119	0.172	0.014	0.0863	0.023225	GO_bp:go_coenzyme_biosynthetic_process
Curated_gene_sets:sene...	220	0.124	0.0137	0.0623	0.023289	Curated_gene_sets:senese_hdac1_targets_dn
GO_bp:go_regulation_of...	47	0.285	0.0147	0.143	0.023291	GO_bp:go_regulation_of_smooth_muscle_cell_migration
GO_bp:go_tube_development	519	0.0857	0.0145	0.0431	0.023392	GO_bp:go_tube_development
Curated_gene_sets:bern...	50	0.267	0.0142	0.134	0.023413	Curated_gene_sets:bernard_ppapdc1b_targets_dn
GO_bp:go_regulation_of...	211	0.126	0.0137	0.0637	0.023518	GO_bp:go_regulation_of_synapse_structure_or_activity
GO_mf:go_activin_binding	12	0.588	0.0153	0.296	0.023542	GO_mf:go_activin_binding
GO_bp:go_negative_regu...	11	0.572	0.0143	0.288	0.023601	GO_bp:go_negative_regulation_of_cytosolic_calcium_ion_concentration
GO_bp:go_positive_regu...	63	0.232	0.0138	0.117	0.023669	GO_bp:go_positive_regulation_of_axonogenesis
GO_bp:go_positive_regu...	346	0.0978	0.0135	0.0495	0.023957	GO_bp:go_positive_regulation_of_intracellular_transport
Curated_gene_sets:burt...	32	0.327	0.0139	0.165	0.024	Curated_gene_sets:burton_adipogenesis_1
GO_bp:go_regulation_of...	305	0.112	0.0146	0.0567	0.024085	GO_bp:go_regulation_of_metal_ion_transport
GO_bp:go_positive_regu...	19	0.41	0.0134	0.208	0.024098	GO_bp:go_positive_regulation_of_nitric_oxide_synthase_activity
GO_bp:go_t_cell_activa...	56	0.285	0.016	0.144	0.0241	GO_bp:go_t_cell_activation_involved_in_immune_response
GO_bp:go_positive_regu...	92	0.196	0.0141	0.0993	0.024161	GO_bp:go_positive_regulation_of_cell_substrate_adhesion
Curated_gene_sets:rodr...	71	0.232	0.0147	0.118	0.024191	Curated_gene_sets:rodrigues_thyroid_carcinoma_dn
GO_bp:go_rhythmic_process	277	0.114	0.0141	0.0576	0.024278	GO_bp:go_rhythmic_process
GO_bp:go_regulation_of...	27	0.362	0.0141	0.184	0.024299	GO_bp:go_regulation_of_macrophage_derived_foam_cell_differentiation
Curated_gene_sets:petr...	12	0.544	0.0142	0.276	0.024339	Curated_gene_sets:petretto_blood_pressure_up
Curated_gene_sets:nuno...	29	0.36	0.0146	0.183	0.024354	Curated_gene_sets:nunoda_response_to_dasatinib_imatinib_up
GO_bp:go_hormone_media...	148	0.157	0.0143	0.0798	0.024409	GO_bp:go_hormone_mediated_signaling_pathway
Curated_gene_sets:more...	17	0.417	0.0129	0.212	0.024472	Curated_gene_sets:moreira_response_to_tsa_dn
Curated_gene_sets:brow...	162	0.142	0.0135	0.0722	0.024555	Curated_gene_sets:browne_hcmv_infection_18hr_up
Curated_gene_sets:waka...	144	0.147	0.0132	0.0749	0.024569	Curated_gene_sets:wakabayashi_adipogenesis_pparg_rxra_bound_36hr
GO_bp:go_positive_regu...	205	0.13	0.0139	0.0663	0.024667	GO_bp:go_positive_regulation_of_sequence_specific_dna_binding_transcription_factor_activity
GO_bp:go_regulation_of...	197	0.137	0.0144	0.0696	0.024682	GO_bp:go_regulation_of_calcium_ion_transport
Curated_gene_sets:daue...	45	0.288	0.0145	0.147	0.024692	Curated_gene_sets:dauer_stat3_targets_up
GO_bp:go_cd4_positive_...	10	0.579	0.0138	0.295	0.024712	GO_bp:go_cd4_positive_or_cd8_positive_alpha_beta_t_cell_lineage_commitment
Curated_gene_sets:wang...	49	0.249	0.0131	0.126	0.024717	Curated_gene_sets:wang_barretts_esophagus_up
Curated_gene_sets:reac...	26	0.364	0.0139	0.185	0.024721	Curated_gene_sets:reactome_endosomal_sorting_complex_required_for_transport_escrt
Curated_gene_sets:reac...	8	0.759	0.0161	0.387	0.024785	Curated_gene_sets:reactome_elevation_of_cytosolic_ca2_levels
Curated_gene_sets:odon...	119	0.16	0.0131	0.0813	0.02479	Curated_gene_sets:odonnell_tfrc_targets_dn
GO_bp:go_response_to_i...	11	0.574	0.0143	0.292	0.024811	GO_bp:go_response_to_inactivity
Curated_gene_sets:phon...	213	0.129	0.0141	0.0656	0.024815	Curated_gene_sets:phong_tnf_response_via_p38_complete
Curated_gene_sets:garg...	11	0.5	0.0125	0.255	0.024875	Curated_gene_sets:gargalovic_response_to_oxidized_phospholipids_lightyellow_up
Curated_gene_sets:bioc...	34	0.296	0.0129	0.151	0.024883	Curated_gene_sets:biocarta_fmlp_pathway
Curated_gene_sets:bioc...	10	0.482	0.0115	0.246	0.024955	Curated_gene_sets:biocarta_ranms_pathway
GO_bp:go_regulation_of...	871	0.0637	0.0138	0.0325	0.024969	GO_bp:go_regulation_of_transferase_activity
GO_bp:go_cardiac_condu...	78	0.222	0.0147	0.113	0.024997	GO_bp:go_cardiac_conduction
GO_bp:go_regulation_of...	17	0.456	0.0141	0.233	0.024999	GO_bp:go_regulation_of_cardiac_muscle_contraction_by_regulation_of_the_release_of_sequestered_calcium_ion
Curated_gene_sets:moha...	388	0.091	0.0133	0.0464	0.025033	Curated_gene_sets:mohankumar_tlx1_targets_up
GO_bp:go_ammonium_tran...	25	0.41	0.0154	0.209	0.025064	GO_bp:go_ammonium_transmembrane_transport
GO_bp:go_organic_hydro...	446	0.0882	0.0138	0.045	0.025192	GO_bp:go_organic_hydroxy_compound_metabolic_process
GO_bp:go_regulation_of...	45	0.301	0.0152	0.154	0.025243	GO_bp:go_regulation_of_skeletal_muscle_tissue_development
GO_bp:go_negative_regu...	26	0.345	0.0132	0.176	0.025317	GO_bp:go_negative_regulation_of_production_of_molecular_mediator_of_immune_response
Curated_gene_sets:kim_...	11	0.501	0.0125	0.256	0.025416	Curated_gene_sets:kim_response_to_tsa_and_decitabine_dn
GO_bp:go_positive_regu...	13	0.563	0.0153	0.288	0.02544	GO_bp:go_positive_regulation_of_cardiac_muscle_cell_differentiation
GO_cc:go_nuclear_envelope	390	0.0942	0.0138	0.0483	0.025449	GO_cc:go_nuclear_envelope
Curated_gene_sets:sest...	45	0.27	0.0136	0.138	0.025662	Curated_gene_sets:sesto_response_to_uv_c5
GO_cc:go_anaphase_prom...	22	0.371	0.0131	0.19	0.025728	GO_cc:go_anaphase_promoting_complex
Curated_gene_sets:garg...	12	0.434	0.0113	0.223	0.025748	Curated_gene_sets:gargalovic_response_to_oxidized_phospholipids_magenta_dn
GO_bp:go_regulation_of...	37	0.312	0.0142	0.16	0.025787	GO_bp:go_regulation_of_b_cell_mediated_immunity
GO_bp:go_negative_regu...	25	0.386	0.0145	0.199	0.025868	GO_bp:go_negative_regulation_of_lipid_transport
Curated_gene_sets:bild...	76	0.213	0.0139	0.11	0.026109	Curated_gene_sets:bild_ctnnb1_oncogenic_signature
GO_bp:go_nucleus_organ...	132	0.16	0.0138	0.0825	0.026158	GO_bp:go_nucleus_organization
GO_bp:go_negative_regu...	14	0.453	0.0127	0.233	0.02626	GO_bp:go_negative_regulation_of_lipase_activity
GO_bp:go_positive_regu...	29	0.353	0.0143	0.182	0.026272	GO_bp:go_positive_regulation_of_cardiac_muscle_tissue_development
Curated_gene_sets:reac...	23	0.391	0.0141	0.202	0.026278	Curated_gene_sets:reactome_trafficking_of_ampa_receptors
Curated_gene_sets:reac...	12	0.496	0.0129	0.256	0.026296	Curated_gene_sets:reactome_sema3a_pak_dependent_axon_repulsion
GO_bp:go_type_b_pancre...	13	0.542	0.0147	0.28	0.026408	GO_bp:go_type_b_pancreatic_cell_development
GO_mf:go_oxidoreductas...	139	0.165	0.0146	0.0855	0.026525	GO_mf:go_oxidoreductase_activity_acting_on_paired_donors_with_incorporation_or_reduction_of_molecular_oxygen
GO_mf:go_histone_methy...	18	0.368	0.0117	0.19	0.026573	GO_mf:go_histone_methyltransferase_activity_h3_k4_specific_
GO_bp:go_membrane_prot...	14	0.494	0.0139	0.256	0.026618	GO_bp:go_membrane_protein_intracellular_domain_proteolysis
GO_bp:go_bone_minerali...	36	0.325	0.0146	0.168	0.026724	GO_bp:go_bone_mineralization
GO_bp:go_demethylation	46	0.274	0.014	0.142	0.026758	GO_bp:go_demethylation
Curated_gene_sets:kang...	20	0.453	0.0152	0.235	0.026823	Curated_gene_sets:kang_fluorouracil_resistance_up
Curated_gene_sets:st_t...	9	0.614	0.0138	0.318	0.026833	Curated_gene_sets:st_type_i_interferon_pathway
Curated_gene_sets:reac...	14	0.525	0.0148	0.272	0.026915	Curated_gene_sets:reactome_creb_phosphorylation_through_the_activation_of_camkii
GO_mf:go_endodeoxyribo...	47	0.285	0.0147	0.148	0.026932	GO_mf:go_endodeoxyribonuclease_activity
Curated_gene_sets:thum...	7	0.813	0.0162	0.422	0.027075	Curated_gene_sets:thum_mir21_targets_heart_disease_dn
Curated_gene_sets:rove...	94	0.239	0.0174	0.124	0.027117	Curated_gene_sets:roversi_glioma_copy_number_up
Curated_gene_sets:ship...	37	0.28	0.0128	0.146	0.027119	Curated_gene_sets:shipp_dlbcl_vs_follicular_lymphoma_dn
Curated_gene_sets:bioc...	28	0.352	0.014	0.183	0.027128	Curated_gene_sets:biocarta_no1_pathway
GO_bp:go_regulation_of...	44	0.269	0.0134	0.14	0.027258	GO_bp:go_regulation_of_alcohol_biosynthetic_process
GO_bp:go_gene_silencing	193	0.138	0.0144	0.072	0.027266	GO_bp:go_gene_silencing
GO_bp:go_regulation_of...	511	0.0845	0.0142	0.044	0.0273	GO_bp:go_regulation_of_cell_morphogenesis
GO_bp:go_regulation_of...	95	0.191	0.0139	0.0993	0.027357	GO_bp:go_regulation_of_calcium_ion_import
GO_mf:go_lamin_binding	17	0.43	0.0133	0.224	0.027365	GO_mf:go_lamin_binding
GO_bp:go_negative_regu...	12	0.639	0.0166	0.333	0.02739	GO_bp:go_negative_regulation_of_oligodendrocyte_differentiation
Curated_gene_sets:tura...	63	0.239	0.0142	0.124	0.027415	Curated_gene_sets:turashvili_breast_lobular_carcinoma_vs_lobular_normal_dn
GO_mf:go_cell_adhesion...	175	0.134	0.0132	0.0697	0.027507	GO_mf:go_cell_adhesion_molecule_binding
Curated_gene_sets:pid_...	39	0.245	0.0115	0.127	0.027529	Curated_gene_sets:pid_plk1_pathway
GO_bp:go_regulation_of...	30	0.3	0.0123	0.156	0.027533	GO_bp:go_regulation_of_protein_export_from_nucleus
Curated_gene_sets:hedv...	12	0.586	0.0152	0.305	0.027584	Curated_gene_sets:hedvat_elf4_targets_up
Curated_gene_sets:ray_...	13	0.377	0.0102	0.197	0.027668	Curated_gene_sets:ray_alzheimers_disease
Curated_gene_sets:reac...	9	0.591	0.0133	0.308	0.027695	Curated_gene_sets:reactome_gamma_carboxylation_transport_and_amino_terminal_cleavage_of_proteins
GO_bp:go_cell_cycle_pr...	1019	0.0566	0.0132	0.0296	0.027771	GO_bp:go_cell_cycle_process
Curated_gene_sets:neme...	30	0.307	0.0127	0.161	0.027773	Curated_gene_sets:nemeth_inflammatory_response_lps_dn
Curated_gene_sets:shin...	13	0.417	0.0113	0.218	0.027794	Curated_gene_sets:shin_b_cell_lymphoma_cluster_1
GO_mf:go_passive_trans...	415	0.0931	0.0141	0.0487	0.027858	GO_mf:go_passive_transmembrane_transporter_activity
Curated_gene_sets:reac...	438	0.0862	0.0134	0.0451	0.027979	Curated_gene_sets:reactome_metabolism_of_lipids_and_lipoproteins
Curated_gene_sets:bioc...	13	0.513	0.0139	0.268	0.02806	Curated_gene_sets:biocarta_granulocytes_pathway
Curated_gene_sets:yao_...	15	0.436	0.0127	0.229	0.028132	Curated_gene_sets:yao_temporal_response_to_progesterone_cluster_4
GO_bp:go_developmental...	70	0.225	0.0141	0.118	0.028139	GO_bp:go_developmental_cell_growth
Curated_gene_sets:ingr...	115	0.17	0.0137	0.0892	0.028147	Curated_gene_sets:ingram_shh_targets_up
Curated_gene_sets:yih_...	18	0.438	0.014	0.229	0.028169	Curated_gene_sets:yih_response_to_arsenite_c2
GO_bp:go_regulation_of...	10	0.534	0.0127	0.28	0.028202	GO_bp:go_regulation_of_interleukin_8_biosynthetic_process
Curated_gene_sets:pid_...	69	0.207	0.0129	0.109	0.028399	Curated_gene_sets:pid_myc_activ_pathway
GO_mf:go_glycoprotein_...	91	0.175	0.0125	0.0918	0.028522	GO_mf:go_glycoprotein_binding
GO_bp:go_regulation_of...	55	0.257	0.0143	0.135	0.028527	GO_bp:go_regulation_of_epithelial_cell_apoptotic_process
GO_bp:go_substrate_ind...	11	0.501	0.0125	0.263	0.028586	GO_bp:go_substrate_independent_telencephalic_tangential_interneuron_migration
GO_bp:go_substrate_ind...	11	0.501	0.0125	0.263	0.028586	GO_bp:go_substrate_independent_telencephalic_tangential_migration
GO_bp:go_pyridine_cont...	22	0.356	0.0126	0.188	0.028669	GO_bp:go_pyridine_containing_compound_biosynthetic_process
Curated_gene_sets:taka...	93	0.173	0.0125	0.0914	0.028835	Curated_gene_sets:takao_response_to_uvb_radiation_dn
Curated_gene_sets:rute...	379	0.0955	0.0138	0.0503	0.028883	Curated_gene_sets:rutella_response_to_hgf_up
GO_bp:go_negative_regu...	322	0.101	0.0135	0.0534	0.028929	GO_bp:go_negative_regulation_of_transferase_activity
GO_bp:go_cellular_resp...	252	0.111	0.0131	0.0586	0.029045	GO_bp:go_cellular_response_to_external_stimulus
GO_bp:go_central_nervo...	154	0.154	0.0143	0.0813	0.029056	GO_bp:go_central_nervous_system_neuron_differentiation
GO_bp:go_regulation_of...	1665	0.0461	0.0135	0.0243	0.029104	GO_bp:go_regulation_of_transport
Curated_gene_sets:kyng...	32	0.319	0.0136	0.169	0.029119	Curated_gene_sets:kyng_environmental_stress_response_not_by_gamma_in_old
Curated_gene_sets:lee_...	52	0.242	0.0131	0.128	0.029277	Curated_gene_sets:lee_liver_cancer_myc_up
GO_bp:go_regulation_of...	1545	0.0479	0.0135	0.0253	0.029317	GO_bp:go_regulation_of_multicellular_organismal_development
GO_bp:go_macromolecula...	1288	0.0504	0.0131	0.0267	0.029393	GO_bp:go_macromolecular_complex_assembly
GO_cc:go_sin3_complex	12	0.503	0.0131	0.266	0.029396	GO_cc:go_sin3_complex
GO_bp:go_positive_regu...	45	0.26	0.0131	0.138	0.02943	GO_bp:go_positive_regulation_of_pathway_restricted_smad_protein_phosphorylation
GO_bp:go_regulation_of...	14	0.495	0.0139	0.262	0.029572	GO_bp:go_regulation_of_corticosteroid_hormone_secretion
GO_bp:go_negative_regu...	45	0.251	0.0126	0.133	0.029578	GO_bp:go_negative_regulation_of_response_to_dna_damage_stimulus
Curated_gene_sets:mark...	14	0.466	0.0131	0.247	0.029602	Curated_gene_sets:marks_hdac_targets_dn
GO_bp:go_aorta_develop...	40	0.295	0.014	0.156	0.029604	GO_bp:go_aorta_development
GO_mf:go_transforming_...	46	0.261	0.0133	0.139	0.029823	GO_mf:go_transforming_growth_factor_beta_receptor_binding
GO_bp:go_positive_regu...	22	0.388	0.0137	0.206	0.029853	GO_bp:go_positive_regulation_of_alcohol_biosynthetic_process
GO_bp:go_positive_regu...	38	0.292	0.0135	0.156	0.030117	GO_bp:go_positive_regulation_of_calcium_mediated_signaling
Curated_gene_sets:four...	6	0.832	0.0153	0.443	0.030131	Curated_gene_sets:fournier_acinar_development_early_dn
Curated_gene_sets:garg...	15	0.487	0.0142	0.259	0.030153	Curated_gene_sets:gargalovic_response_to_oxidized_phospholipids_red_up
GO_bp:go_epithelial_ce...	86	0.197	0.0137	0.105	0.030254	GO_bp:go_epithelial_cell_proliferation
Curated_gene_sets:kegg...	52	0.245	0.0133	0.131	0.0303	Curated_gene_sets:kegg_vibrio_cholerae_infection
GO_mf:go_oxidoreductas...	37	0.294	0.0134	0.156	0.030313	GO_mf:go_oxidoreductase_activity_acting_on_paired_donors_with_incorporation_or_reduction_of_molecular_oxygen_2_oxoglutarate_as_one_donor_and_incorporation_of_one_atom_each_of_oxygen_into_both_donors
GO_bp:go_phenol_contai...	71	0.198	0.0125	0.106	0.030491	GO_bp:go_phenol_containing_compound_metabolic_process
GO_bp:go_regulation_of...	77	0.213	0.014	0.114	0.03056	GO_bp:go_regulation_of_potassium_ion_transport
Curated_gene_sets:yao_...	27	0.328	0.0128	0.175	0.03059	Curated_gene_sets:yao_temporal_response_to_progesterone_cluster_5
GO_bp:go_negative_regu...	397	0.0895	0.0133	0.0478	0.030606	GO_bp:go_negative_regulation_of_intracellular_signal_transduction
GO_bp:go_regulation_of...	36	0.303	0.0137	0.162	0.030644	GO_bp:go_regulation_of_receptor_internalization
GO_bp:go_regulation_of...	140	0.143	0.0127	0.0767	0.030678	GO_bp:go_regulation_of_extrinsic_apoptotic_signaling_pathway
Curated_gene_sets:begu...	6	0.84	0.0155	0.449	0.030684	Curated_gene_sets:begum_targets_of_pax3_foxo1_fusion_and_pax3
GO_mf:go_protein_compl...	877	0.0604	0.0131	0.0323	0.030749	GO_mf:go_protein_complex_binding
GO_bp:go_nuclear_trans...	321	0.0942	0.0126	0.0504	0.030756	GO_bp:go_nuclear_transport
Curated_gene_sets:zwan...	224	0.115	0.0129	0.0617	0.030763	Curated_gene_sets:zwang_down_by_2nd_egf_pulse
GO_bp:go_hindlimb_morp...	35	0.32	0.0142	0.171	0.030905	GO_bp:go_hindlimb_morphogenesis
GO_bp:go_transcription...	676	0.0684	0.0131	0.0366	0.030977	GO_bp:go_transcription_from_rna_polymerase_ii_promoter
GO_mf:go_peptide_antig...	25	0.342	0.0128	0.183	0.031016	GO_mf:go_peptide_antigen_binding
GO_bp:go_negative_regu...	13	0.438	0.0119	0.235	0.03104	GO_bp:go_negative_regulation_of_dna_dependent_dna_replication
GO_bp:go_establishment...	13	0.485	0.0131	0.26	0.031047	GO_bp:go_establishment_or_maintenance_of_transmembrane_electrochemical_gradient
GO_bp:go_negative_regu...	97	0.195	0.0144	0.105	0.031058	GO_bp:go_negative_regulation_of_gene_expression_epigenetic
GO_cc:go_nuclear_chrom...	271	0.108	0.0132	0.0578	0.031102	GO_cc:go_nuclear_chromatin
Curated_gene_sets:izad...	117	0.163	0.0132	0.0872	0.031108	Curated_gene_sets:izadpanah_stem_cell_adipose_vs_bone_up
GO_bp:go_positive_regu...	34	0.328	0.0144	0.176	0.031147	GO_bp:go_positive_regulation_of_potassium_ion_transport
GO_cc:go_somatodendrit...	589	0.0737	0.0132	0.0396	0.031258	GO_cc:go_somatodendritic_compartment
Curated_gene_sets:zhu_...	119	0.166	0.0136	0.0891	0.031313	Curated_gene_sets:zhu_cmv_all_dn
GO_bp:go_positive_regu...	1672	0.0455	0.0133	0.0244	0.031316	GO_bp:go_positive_regulation_of_biosynthetic_process
GO_bp:go_chromatin_sil...	36	0.397	0.0179	0.213	0.031423	GO_bp:go_chromatin_silencing_at_rdna
Curated_gene_sets:zamo...	90	0.185	0.0132	0.0997	0.031442	Curated_gene_sets:zamora_nos2_targets_dn
Curated_gene_sets:peng...	226	0.116	0.013	0.0621	0.031492	Curated_gene_sets:peng_rapamycin_response_dn
GO_bp:go_regulation_of...	17	0.414	0.0128	0.223	0.031569	GO_bp:go_regulation_of_long_term_synaptic_potentiation
GO_bp:go_regulation_of...	39	0.295	0.0138	0.159	0.031633	GO_bp:go_regulation_of_endothelial_cell_apoptotic_process
Curated_gene_sets:thum...	206	0.124	0.0133	0.0666	0.031678	Curated_gene_sets:thum_systolic_heart_failure_dn
GO_bp:go_positive_regu...	22	0.385	0.0136	0.208	0.031833	GO_bp:go_positive_regulation_of_cellular_response_to_transforming_growth_factor_beta_stimulus
GO_bp:go_positive_regu...	22	0.385	0.0136	0.208	0.031833	GO_bp:go_positive_regulation_of_transforming_growth_factor_beta_receptor_signaling_pathway
Curated_gene_sets:kim_...	157	0.131	0.0123	0.0705	0.031853	Curated_gene_sets:kim_wt1_targets_8hr_up
GO_mf:go_oxidoreductas...	661	0.0692	0.0131	0.0373	0.031914	GO_mf:go_oxidoreductase_activity
Curated_gene_sets:vecc...	301	0.106	0.0137	0.0571	0.032043	Curated_gene_sets:vecchi_gastric_cancer_early_dn
Curated_gene_sets:kegg...	23	0.361	0.013	0.195	0.032071	Curated_gene_sets:kegg_maturity_onset_diabetes_of_the_young
Curated_gene_sets:amit...	38	0.282	0.013	0.152	0.032141	Curated_gene_sets:amit_egf_response_40_hela
GO_bp:go_regulation_of...	324	0.102	0.0136	0.0549	0.032175	GO_bp:go_regulation_of_membrane_potential
GO_bp:go_cell_surface_...	63	0.229	0.0136	0.124	0.032256	GO_bp:go_cell_surface_receptor_signaling_pathway_involved_in_cell_cell_signaling
GO_bp:go_peptide_catab...	23	0.398	0.0143	0.215	0.032258	GO_bp:go_peptide_catabolic_process
GO_cc:go_chromosome_ce...	159	0.132	0.0125	0.0715	0.032288	GO_cc:go_chromosome_centromeric_region
GO_bp:go_nerve_develop...	64	0.221	0.0133	0.12	0.032303	GO_bp:go_nerve_development
GO_bp:go_negative_regu...	50	0.262	0.0139	0.142	0.032333	GO_bp:go_negative_regulation_of_autophagy
Curated_gene_sets:phon...	153	0.147	0.0136	0.0794	0.032425	Curated_gene_sets:phong_tnf_response_via_p38_partial
GO_bp:go_regulation_of...	13	0.492	0.0133	0.266	0.032504	GO_bp:go_regulation_of_cell_proliferation_involved_in_heart_morphogenesis
Curated_gene_sets:bila...	22	0.387	0.0136	0.21	0.032513	Curated_gene_sets:bilanges_serum_sensitive_via_tsc1
GO_bp:go_inner_ear_rec...	34	0.3	0.0131	0.163	0.032595	GO_bp:go_inner_ear_receptor_cell_development
GO_bp:go_termination_o...	57	0.21	0.0119	0.114	0.032721	GO_bp:go_termination_of_rna_polymerase_ii_transcription
Curated_gene_sets:smid...	78	0.204	0.0135	0.111	0.032733	Curated_gene_sets:smid_breast_cancer_luminal_a_up
GO_bp:go_regulation_of...	10	0.504	0.012	0.273	0.032771	GO_bp:go_regulation_of_fibrinolysis
Curated_gene_sets:sato...	40	0.264	0.0125	0.143	0.032805	Curated_gene_sets:sato_silenced_by_deacetylation_in_pancreatic_cancer
GO_mf:go_chromatin_dna...	73	0.192	0.0123	0.104	0.032815	GO_mf:go_chromatin_dna_binding
GO_bp:go_positive_regu...	11	0.485	0.0121	0.264	0.032827	GO_bp:go_positive_regulation_of_erad_pathway
GO_bp:go_cardiac_septu...	80	0.202	0.0135	0.11	0.032967	GO_bp:go_cardiac_septum_development
GO_bp:go_ribonucleopro...	105	0.156	0.012	0.0847	0.032981	GO_bp:go_ribonucleoprotein_complex_localization
GO_bp:go_negative_regu...	101	0.184	0.0138	0.0999	0.032998	GO_bp:go_negative_regulation_of_protein_catabolic_process
GO_cc:go_anchoring_jun...	459	0.0822	0.0131	0.0448	0.033134	GO_cc:go_anchoring_junction
GO_bp:go_glial_cell_fa...	12	0.571	0.0149	0.311	0.033152	GO_bp:go_glial_cell_fate_commitment
GO_bp:go_fat_soluble_v...	32	0.328	0.0139	0.179	0.033234	GO_bp:go_fat_soluble_vitamin_metabolic_process
GO_bp:go_positive_regu...	19	0.408	0.0134	0.222	0.033276	GO_bp:go_positive_regulation_of_excitatory_postsynaptic_potential
GO_mf:go_pre_mrna_binding	22	0.386	0.0136	0.21	0.03328	GO_mf:go_pre_mrna_binding
GO_bp:go_female_meioti...	25	0.354	0.0133	0.193	0.033285	GO_bp:go_female_meiotic_division
Curated_gene_sets:kara...	16	0.424	0.0128	0.231	0.033328	Curated_gene_sets:karakas_tgfb1_signaling
GO_bp:go_regulation_of...	37	0.272	0.0124	0.149	0.033332	GO_bp:go_regulation_of_meiotic_cell_cycle
GO_mf:go_core_promoter...	142	0.144	0.0129	0.0787	0.033372	GO_mf:go_core_promoter_binding
GO_bp:go_respiratory_s...	187	0.134	0.0137	0.0729	0.033432	GO_bp:go_respiratory_system_development
GO_bp:go_macromolecule...	192	0.115	0.012	0.063	0.033508	GO_bp:go_macromolecule_methylation
GO_bp:go_venous_blood_...	14	0.499	0.014	0.273	0.033512	GO_bp:go_venous_blood_vessel_development
GO_bp:go_regulation_of...	68	0.205	0.0127	0.112	0.033699	GO_bp:go_regulation_of_acute_inflammatory_response
Curated_gene_sets:brow...	220	0.115	0.0128	0.0629	0.033709	Curated_gene_sets:browne_hcmv_infection_20hr_up
GO_bp:go_positive_regu...	81	0.178	0.012	0.0973	0.033716	GO_bp:go_positive_regulation_of_leukocyte_mediated_immunity
GO_bp:go_ear_development	187	0.134	0.0137	0.0734	0.033746	GO_bp:go_ear_development
GO_bp:go_positive_regu...	13	0.464	0.0126	0.254	0.033834	GO_bp:go_positive_regulation_of_long_term_synaptic_potentiation
GO_bp:go_negative_regu...	12	0.512	0.0133	0.28	0.03386	GO_bp:go_negative_regulation_of_skeletal_muscle_tissue_development
GO_bp:go_cell_matrix_a...	114	0.159	0.0127	0.0871	0.033882	GO_bp:go_cell_matrix_adhesion
GO_bp:go_positive_regu...	55	0.235	0.0131	0.129	0.033897	GO_bp:go_positive_regulation_of_epithelial_cell_differentiation
GO_bp:go_neutral_lipid...	76	0.188	0.0123	0.103	0.034025	GO_bp:go_neutral_lipid_metabolic_process
Curated_gene_sets:pid_...	22	0.341	0.012	0.187	0.03405	Curated_gene_sets:pid_myc_pathway
GO_bp:go_locomotory_be...	171	0.131	0.0128	0.072	0.034108	GO_bp:go_locomotory_behavior
GO_mf:go_retinoic_acid...	15	0.545	0.0159	0.299	0.03414	GO_mf:go_retinoic_acid_binding
GO_bp:go_transmembrane...	176	0.132	0.0131	0.0724	0.034206	GO_bp:go_transmembrane_receptor_protein_serine_threonine_kinase_signaling_pathway
GO_bp:go_regulation_of...	1347	0.0486	0.0129	0.0267	0.034218	GO_bp:go_regulation_of_cell_death
Curated_gene_sets:yama...	195	0.122	0.0128	0.0671	0.034231	Curated_gene_sets:yamazaki_tceb3_targets_dn
GO_bp:go_pyrimidine_nu...	19	0.405	0.0133	0.223	0.034258	GO_bp:go_pyrimidine_nucleoside_triphosphate_metabolic_process
Curated_gene_sets:zhan...	391	0.0837	0.0123	0.0459	0.034265	Curated_gene_sets:zhang_breast_cancer_progenitors_up
Curated_gene_sets:grae...	1650	0.0443	0.0129	0.0244	0.034465	Curated_gene_sets:graessmann_apoptosis_by_doxorubicin_dn
GO_bp:go_positive_regu...	34	0.322	0.0141	0.177	0.034495	GO_bp:go_positive_regulation_of_epithelial_to_mesenchymal_transition
GO_mf:go_signaling_pat...	17	0.426	0.0132	0.234	0.034506	GO_mf:go_signaling_pattern_recognition_receptor_activity
GO_bp:go_regulation_of...	770	0.0638	0.013	0.0351	0.034518	GO_bp:go_regulation_of_cell_development
Curated_gene_sets:ivan...	265	0.105	0.0128	0.0579	0.034524	Curated_gene_sets:ivanova_hematopoiesis_mature_cell
GO_bp:go_antigen_proce...	87	0.176	0.0123	0.0969	0.034695	GO_bp:go_antigen_processing_and_presentation_of_peptide_or_polysaccharide_antigen_via_mhc_class_ii
GO_bp:go_antigen_proce...	87	0.176	0.0123	0.0969	0.034695	GO_bp:go_antigen_processing_and_presentation_of_peptide_antigen_via_mhc_class_ii
Curated_gene_sets:kang...	15	0.489	0.0142	0.269	0.034708	Curated_gene_sets:kang_ar_targets_up
GO_bp:go_modification_...	44	0.254	0.0126	0.14	0.03474	GO_bp:go_modification_by_symbiont_of_host_morphology_or_physiology
GO_bp:go_cochlea_morph...	19	0.375	0.0123	0.207	0.034787	GO_bp:go_cochlea_morphogenesis
Curated_gene_sets:dute...	453	0.083	0.0131	0.0457	0.0348	Curated_gene_sets:dutertre_estradiol_response_24hr_dn
GO_bp:go_cardiac_septu...	45	0.271	0.0136	0.149	0.034817	GO_bp:go_cardiac_septum_morphogenesis
GO_bp:go_lysine_metabo...	11	0.528	0.0132	0.291	0.034871	GO_bp:go_lysine_metabolic_process
Curated_gene_sets:wu_a...	11	0.482	0.012	0.266	0.034879	Curated_gene_sets:wu_apoptosis_by_cdkn1a_not_via_tp53
Curated_gene_sets:pid_...	45	0.25	0.0126	0.138	0.034989	Curated_gene_sets:pid_a6b1_a6b4_integrin_pathway
Curated_gene_sets:lian...	36	0.281	0.0127	0.155	0.035028	Curated_gene_sets:liang_hematopoiesis_stem_cell_number_small_vs_huge_up
GO_bp:go_regulation_of...	101	0.162	0.0122	0.0897	0.035335	GO_bp:go_regulation_of_protein_ubiquitination_involved_in_ubiquitin_dependent_protein_catabolic_process
Curated_gene_sets:bert...	177	0.126	0.0125	0.0698	0.035393	Curated_gene_sets:bertucci_medullary_vs_ductal_breast_cancer_up
Curated_gene_sets:woo_...	95	0.178	0.013	0.0985	0.035483	Curated_gene_sets:woo_liver_cancer_recurrence_up
GO_bp:go_positive_regu...	1053	0.0542	0.0128	0.0301	0.035645	GO_bp:go_positive_regulation_of_protein_modification_process
Curated_gene_sets:wu_h...	20	0.393	0.0132	0.218	0.035653	Curated_gene_sets:wu_hbx_targets_1_dn
GO_bp:go_calcium_media...	80	0.192	0.0129	0.106	0.035733	GO_bp:go_calcium_mediated_signaling
GO_bp:go_positive_regu...	26	0.326	0.0125	0.181	0.035735	GO_bp:go_positive_regulation_of_acute_inflammatory_response
Curated_gene_sets:kong...	93	0.17	0.0123	0.0942	0.035794	Curated_gene_sets:kong_e2f3_targets
Curated_gene_sets:bioc...	21	0.37	0.0127	0.205	0.035797	Curated_gene_sets:biocarta_ceramide_pathway
Curated_gene_sets:weig...	59	0.23	0.0133	0.128	0.035837	Curated_gene_sets:weigel_oxidative_stress_by_hne_and_tbh
GO_bp:go_cellular_resp...	207	0.122	0.0131	0.0677	0.035854	GO_bp:go_cellular_response_to_steroid_hormone_stimulus
GO_bp:go_negative_regu...	97	0.174	0.0128	0.0965	0.035862	GO_bp:go_negative_regulation_of_dna_metabolic_process
Curated_gene_sets:reac...	36	0.346	0.0156	0.192	0.035865	Curated_gene_sets:reactome_beta_defensins
GO_bp:go_secondary_met...	44	0.249	0.0124	0.138	0.035874	GO_bp:go_secondary_metabolic_process
GO_bp:go_pyrimidine_nu...	17	0.419	0.013	0.233	0.035959	GO_bp:go_pyrimidine_nucleoside_triphosphate_biosynthetic_process
Curated_gene_sets:ferr...	5	0.789	0.0133	0.439	0.036028	Curated_gene_sets:ferrari_response_to_fenretinide_dn
Curated_gene_sets:shaf...	62	0.219	0.013	0.122	0.036069	Curated_gene_sets:shaffer_irf4_targets_in_plasma_cell_vs_mature_b_lymphocyte
GO_cc:go_excitatory_sy...	179	0.135	0.0135	0.0748	0.036083	GO_cc:go_excitatory_synapse
Curated_gene_sets:zhan...	277	0.105	0.013	0.0584	0.036183	Curated_gene_sets:zhang_tlx_targets_60hr_up
GO_bp:go_negative_regu...	31	0.3	0.0125	0.167	0.03624	GO_bp:go_negative_regulation_of_extrinsic_apoptotic_signaling_pathway_via_death_domain_receptors
GO_mf:go_transmembrane...	78	0.203	0.0135	0.113	0.036261	GO_mf:go_transmembrane_receptor_protein_kinase_activity
GO_bp:go_positive_regu...	117	0.155	0.0126	0.0865	0.036271	GO_bp:go_positive_regulation_of_nf_kappab_transcription_factor_activity
GO_mf:go_voltage_gated...	125	0.156	0.013	0.0867	0.03632	GO_mf:go_voltage_gated_cation_channel_activity
GO_bp:go_regulation_of...	17	0.347	0.0108	0.194	0.036343	GO_bp:go_regulation_of_cell_migration_involved_in_sprouting_angiogenesis
Curated_gene_sets:kegg...	24	0.372	0.0137	0.207	0.036457	Curated_gene_sets:kegg_dorso_ventral_axis_formation
GO_bp:go_positive_regu...	25	0.297	0.0111	0.165	0.036479	GO_bp:go_positive_regulation_of_lymphocyte_migration
Curated_gene_sets:barr...	27	0.345	0.0135	0.193	0.036623	Curated_gene_sets:barrier_cancer_relapse_normal_sample_dn
GO_mf:go_translation_r...	18	0.379	0.0121	0.212	0.036624	GO_mf:go_translation_repressor_activity
GO_bp:go_golgi_organiz...	80	0.194	0.013	0.108	0.036771	GO_bp:go_golgi_organization
Curated_gene_sets:pid_...	99	0.17	0.0127	0.0948	0.036855	Curated_gene_sets:pid_erbb1_downstream_pathway
Curated_gene_sets:sene...	482	0.0773	0.0126	0.0432	0.036916	Curated_gene_sets:senese_hdac3_targets_dn
Curated_gene_sets:croo...	52	0.245	0.0132	0.137	0.036926	Curated_gene_sets:croonquist_stromal_stimulation_up
GO_bp:go_regulation_of...	396	0.0843	0.0125	0.0472	0.036969	GO_bp:go_regulation_of_immune_effector_process
Curated_gene_sets:ouil...	50	0.239	0.0127	0.134	0.036979	Curated_gene_sets:ouillette_cll_13q14_deletion_dn
GO_bp:go_bone_growth	17	0.441	0.0136	0.247	0.037146	GO_bp:go_bone_growth
Curated_gene_sets:nadl...	52	0.229	0.0124	0.128	0.037185	Curated_gene_sets:nadler_hyperglycemia_at_obesity
GO_bp:go_cellular_resp...	15	0.404	0.0117	0.226	0.0372	GO_bp:go_cellular_response_to_leptin_stimulus
GO_bp:go_regulation_of...	13	0.478	0.0129	0.268	0.037279	GO_bp:go_regulation_of_cholesterol_storage
Curated_gene_sets:grah...	11	0.46	0.0115	0.258	0.037288	Curated_gene_sets:graham_cml_quiescent_vs_cml_dividing_dn
GO_bp:go_intrinsic_apo...	31	0.307	0.0128	0.172	0.037288	GO_bp:go_intrinsic_apoptotic_signaling_pathway_in_response_to_endoplasmic_reticulum_stress
GO_bp:go_t_cell_differ...	26	0.33	0.0126	0.185	0.037291	GO_bp:go_t_cell_differentiation_involved_in_immune_response
GO_bp:go_cell_development	1323	0.0484	0.0127	0.0272	0.037484	GO_bp:go_cell_development
GO_bp:go_cardiac_chamb...	137	0.151	0.0133	0.085	0.0375	GO_bp:go_cardiac_chamber_development
GO_bp:go_regulation_of...	139	0.145	0.0128	0.0813	0.037564	GO_bp:go_regulation_of_organelle_assembly
GO_bp:go_positive_regu...	66	0.195	0.0119	0.11	0.037662	GO_bp:go_positive_regulation_of_lymphocyte_mediated_immunity
GO_bp:go_regulation_of...	146	0.133	0.012	0.0747	0.037709	GO_bp:go_regulation_of_leukocyte_mediated_immunity
GO_bp:go_response_to_bmp	85	0.188	0.013	0.106	0.037738	GO_bp:go_response_to_bmp
GO_bp:go_cellular_resp...	85	0.188	0.013	0.106	0.037738	GO_bp:go_cellular_response_to_bmp_stimulus
Curated_gene_sets:zhou...	404	0.0839	0.0125	0.0472	0.037771	Curated_gene_sets:zhou_inflammatory_response_live_up
Curated_gene_sets:reac...	108	0.199	0.0155	0.112	0.037814	Curated_gene_sets:reactome_meiosis
GO_bp:go_negative_regu...	12	0.501	0.0131	0.282	0.037883	GO_bp:go_negative_regulation_of_multicellular_organismal_metabolic_process
GO_cc:go_chromatin	410	0.0867	0.013	0.0488	0.037905	GO_cc:go_chromatin
GO_bp:go_regulation_of...	60	0.217	0.0126	0.122	0.037921	GO_bp:go_regulation_of_cartilage_development
GO_bp:go_negative_regu...	11	0.534	0.0133	0.301	0.038024	GO_bp:go_negative_regulation_of_ryanodine_sensitive_calcium_release_channel_activity
Curated_gene_sets:coul...	127	0.153	0.0129	0.086	0.038032	Curated_gene_sets:coulouarn_temporal_tgfb1_signature_dn
GO_cc:go_endocytic_ves...	135	0.144	0.0126	0.0813	0.038121	GO_cc:go_endocytic_vesicle_membrane
GO_bp:go_axis_elongation	27	0.369	0.0144	0.208	0.038185	GO_bp:go_axis_elongation
Curated_gene_sets:setl...	17	0.36	0.0112	0.203	0.038221	Curated_gene_sets:setlur_prostate_cancer_tmprss2_erg_fusion_dn
GO_bp:go_regulation_of...	56	0.223	0.0125	0.126	0.038331	GO_bp:go_regulation_of_smoothened_signaling_pathway
GO_bp:go_negative_regu...	27	0.308	0.012	0.174	0.038384	GO_bp:go_negative_regulation_of_intracellular_steroid_hormone_receptor_signaling_pathway
Curated_gene_sets:pid_...	40	0.276	0.0131	0.156	0.038406	Curated_gene_sets:pid_upa_upar_pathway
GO_bp:go_circadian_rhythm	131	0.144	0.0124	0.0816	0.038426	GO_bp:go_circadian_rhythm
GO_bp:go_appendage_dev...	163	0.139	0.0133	0.0788	0.038736	GO_bp:go_appendage_development
GO_bp:go_limb_development	163	0.139	0.0133	0.0788	0.038736	GO_bp:go_limb_development
GO_bp:go_metanephric_r...	11	0.567	0.0141	0.321	0.038825	GO_bp:go_metanephric_renal_vesicle_morphogenesis
Curated_gene_sets:gese...	21	0.37	0.0127	0.21	0.038899	Curated_gene_sets:geserick_tert_targets_dn
Curated_gene_sets:borc...	88	0.164	0.0115	0.093	0.038966	Curated_gene_sets:borczuk_malignant_mesothelioma_dn
GO_mf:go_transmembrane...	61	0.227	0.0133	0.129	0.03897	GO_mf:go_transmembrane_receptor_protein_tyrosine_kinase_activity
GO_mf:go_ligand_gated_...	122	0.159	0.0131	0.09	0.038989	GO_mf:go_ligand_gated_channel_activity
GO_bp:go_regulation_of...	84	0.196	0.0134	0.111	0.039039	GO_bp:go_regulation_of_cytokine_biosynthetic_process
Curated_gene_sets:chan...	191	0.124	0.0128	0.0705	0.03905	Curated_gene_sets:chandran_metastasis_up
GO_bp:go_lymph_vessel_...	19	0.388	0.0127	0.22	0.039135	GO_bp:go_lymph_vessel_development
Curated_gene_sets:zhou...	45	0.246	0.0124	0.14	0.039142	Curated_gene_sets:zhou_tnf_signaling_30min
GO_bp:go_single_organi...	362	0.0894	0.0127	0.0508	0.039213	GO_bp:go_single_organism_behavior
GO_bp:go_response_to_c...	165	0.129	0.0124	0.0732	0.039298	GO_bp:go_response_to_corticosteroid
Curated_gene_sets:davi...	19	0.378	0.0124	0.215	0.0393	Curated_gene_sets:davicioni_pax_foxo1_signature_in_arms_dn
GO_cc:go_neuron_part	1159	0.0513	0.0127	0.0292	0.039322	GO_cc:go_neuron_part
GO_cc:go_ionotropic_gl...	41	0.265	0.0127	0.151	0.039602	GO_cc:go_ionotropic_glutamate_receptor_complex
GO_bp:go_negative_regu...	17	0.431	0.0134	0.246	0.039619	GO_bp:go_negative_regulation_of_endoplasmic_reticulum_stress_induced_intrinsic_apoptotic_signaling_pathway
GO_bp:go_sterol_transport	50	0.228	0.0121	0.13	0.039648	GO_bp:go_sterol_transport
GO_bp:go_regulation_of...	91	0.165	0.0118	0.0944	0.039786	GO_bp:go_regulation_of_smooth_muscle_cell_proliferation
Curated_gene_sets:kegg...	166	0.127	0.0123	0.0725	0.039802	Curated_gene_sets:kegg_endocytosis
GO_cc:go_cell_junction	1059	0.0538	0.0128	0.0307	0.03984	GO_cc:go_cell_junction
Curated_gene_sets:pid_...	24	0.303	0.0111	0.173	0.039954	Curated_gene_sets:pid_il3_pathway
GO_cc:go_nuclear_chrom...	486	0.0751	0.0123	0.0429	0.040012	GO_cc:go_nuclear_chromosome
GO_bp:go_regulation_of...	36	0.27	0.0122	0.154	0.040048	GO_bp:go_regulation_of_dna_dependent_dna_replication
Curated_gene_sets:kyng...	68	0.211	0.0131	0.121	0.040298	Curated_gene_sets:kyng_response_to_h2o2
Curated_gene_sets:tart...	355	0.0897	0.0126	0.0514	0.04034	Curated_gene_sets:tarte_plasma_cell_vs_plasmablast_up
GO_bp:go_circadian_reg...	54	0.226	0.0125	0.13	0.040348	GO_bp:go_circadian_regulation_of_gene_expression
Curated_gene_sets:tonk...	7	0.581	0.0116	0.333	0.040442	Curated_gene_sets:tonks_targets_of_runx1_runx1t1_fusion_sustained_in_granulocyte_dn
GO_bp:go_dna_demethyla...	13	0.548	0.0148	0.314	0.04048	GO_bp:go_dna_demethylation
Curated_gene_sets:reac...	21	0.332	0.0114	0.19	0.04049	Curated_gene_sets:reactome_circadian_repression_of_expression_by_rev_erba
Curated_gene_sets:howl...	14	0.386	0.0108	0.221	0.040503	Curated_gene_sets:howlin_cited1_targets_2_dn
GO_cc:go_chylomicron	13	0.5	0.0136	0.287	0.040508	GO_cc:go_chylomicron
GO_bp:go_positive_regu...	53	0.251	0.0137	0.144	0.040592	GO_bp:go_positive_regulation_of_muscle_tissue_development
GO_bp:go_nad_biosynthe...	15	0.375	0.0109	0.215	0.040752	GO_bp:go_nad_biosynthetic_process
GO_bp:go_notch_signali...	106	0.168	0.013	0.0965	0.040755	GO_bp:go_notch_signaling_pathway
Curated_gene_sets:bioc...	18	0.403	0.0129	0.232	0.040891	Curated_gene_sets:biocarta_gcr_pathway
GO_mf:go_macromolecula...	1301	0.0465	0.0121	0.0267	0.040994	GO_mf:go_macromolecular_complex_binding
GO_bp:go_negative_regu...	37	0.279	0.0127	0.16	0.041019	GO_bp:go_negative_regulation_of_g_protein_coupled_receptor_protein_signaling_pathway
GO_bp:go_regulation_of...	25	0.323	0.0121	0.186	0.041034	GO_bp:go_regulation_of_transcription_involved_in_g1_s_transition_of_mitotic_cell_cycle
GO_bp:go_plasma_lipopr...	20	0.371	0.0125	0.214	0.04112	GO_bp:go_plasma_lipoprotein_particle_clearance
GO_bp:go_cardiac_ventr...	102	0.174	0.0132	0.1	0.041167	GO_bp:go_cardiac_ventricle_development
GO_bp:go_drug_transmem...	18	0.412	0.0131	0.237	0.041299	GO_bp:go_drug_transmembrane_transport
GO_bp:go_regulation_of...	42	0.25	0.0122	0.144	0.041314	GO_bp:go_regulation_of_lipid_storage
GO_bp:go_detection_of_...	13	0.487	0.0132	0.281	0.041439	GO_bp:go_detection_of_temperature_stimulus_involved_in_sensory_perception_of_pain
GO_bp:go_detection_of_...	13	0.487	0.0132	0.281	0.041439	GO_bp:go_detection_of_temperature_stimulus_involved_in_sensory_perception
GO_bp:go_epithelial_ce...	13	0.555	0.015	0.32	0.041501	GO_bp:go_epithelial_cell_fate_commitment
Curated_gene_sets:bioc...	15	0.417	0.0121	0.241	0.041689	Curated_gene_sets:biocarta_tnfr2_pathway
Curated_gene_sets:pid_...	37	0.294	0.0134	0.17	0.041745	Curated_gene_sets:pid_integrin3_pathway
Curated_gene_sets:ramj...	6	0.596	0.011	0.344	0.041777	Curated_gene_sets:ramjaun_apoptosis_by_tgfb1_via_mapk1_up
GO_bp:go_positive_regu...	61	0.206	0.0121	0.119	0.041886	GO_bp:go_positive_regulation_of_phosphatidylinositol_3_kinase_signaling
GO_bp:go_dna_catabolic...	23	0.342	0.0123	0.198	0.042016	GO_bp:go_dna_catabolic_process
GO_mf:go_frizzled_binding	32	0.283	0.012	0.164	0.042035	GO_mf:go_frizzled_binding
Curated_gene_sets:naka...	69	0.183	0.0114	0.106	0.042081	Curated_gene_sets:nakayama_soft_tissue_tumors_pca2_dn
Curated_gene_sets:gavi...	91	0.177	0.0127	0.103	0.042125	Curated_gene_sets:gavin_foxp3_targets_cluster_t4
Curated_gene_sets:kayo...	213	0.108	0.0118	0.0628	0.042163	Curated_gene_sets:kayo_aging_muscle_up
GO_bp:go_patterning_of...	31	0.292	0.0122	0.169	0.042231	GO_bp:go_patterning_of_blood_vessels
GO_mf:go_hydrolase_act...	11	0.4	0.00998	0.232	0.042337	GO_mf:go_hydrolase_activity_acting_on_ether_bonds
Curated_gene_sets:zemb...	18	0.373	0.0119	0.216	0.042354	Curated_gene_sets:zembutsu_sensitivity_to_methotrexate
GO_bp:go_distal_tubule...	12	0.529	0.0138	0.308	0.042645	GO_bp:go_distal_tubule_development
Curated_gene_sets:reac...	12	0.528	0.0137	0.307	0.042651	Curated_gene_sets:reactome_signaling_by_notch3
GO_cc:go_heterochromatin	61	0.205	0.012	0.119	0.042709	GO_cc:go_heterochromatin
GO_cc:go_condensed_chr...	179	0.116	0.0116	0.0677	0.042768	GO_cc:go_condensed_chromosome
Curated_gene_sets:simb...	30	0.277	0.0114	0.161	0.042778	Curated_gene_sets:simbulan_uv_response_immortalized_dn
Curated_gene_sets:amit...	41	0.252	0.0121	0.147	0.042843	Curated_gene_sets:amit_egf_response_60_hela
Curated_gene_sets:rick...	106	0.17	0.0131	0.0989	0.043024	Curated_gene_sets:rickman_tumor_differentiated_moderately_vs_poorly_up
Curated_gene_sets:benp...	204	0.109	0.0116	0.0633	0.043031	Curated_gene_sets:benporath_myc_targets_with_ebox
GO_mf:go_quinone_binding	17	0.391	0.0121	0.228	0.043112	GO_mf:go_quinone_binding
Curated_gene_sets:gros...	96	0.158	0.0116	0.0919	0.043183	Curated_gene_sets:gross_hypoxia_via_elk3_and_hif1a_dn
Curated_gene_sets:pid_...	25	0.292	0.011	0.17	0.043289	Curated_gene_sets:pid_insulin_glucose_pathway
GO_bp:go_endomembrane_...	441	0.0774	0.0121	0.0452	0.043337	GO_bp:go_endomembrane_system_organization
GO_bp:go_forelimb_morp...	38	0.283	0.0131	0.165	0.043444	GO_bp:go_forelimb_morphogenesis
GO_bp:go_regulation_of...	49	0.247	0.013	0.144	0.043643	GO_bp:go_regulation_of_morphogenesis_of_a_branching_structure
GO_mf:go_deoxyribonucl...	64	0.205	0.0123	0.12	0.043702	GO_mf:go_deoxyribonuclease_activity
Curated_gene_sets:pid_...	27	0.272	0.0106	0.16	0.043849	Curated_gene_sets:pid_integrin2_pathway
GO_bp:go_trna_methylation	23	0.278	0.01	0.163	0.043853	GO_bp:go_trna_methylation
GO_bp:go_response_to_g...	11	0.481	0.012	0.282	0.04388	GO_bp:go_response_to_gravity
Curated_gene_sets:dona...	6	0.671	0.0123	0.393	0.043975	Curated_gene_sets:donato_cell_cycle_tretinoin
Curated_gene_sets:kapo...	6	0.656	0.0121	0.384	0.04407	Curated_gene_sets:kaposi_liver_cancer_met_dn
Curated_gene_sets:gaus...	29	0.309	0.0125	0.181	0.044141	Curated_gene_sets:gaussmann_mll_af4_fusion_targets_g_dn
GO_bp:go_regulation_of...	45	0.239	0.0121	0.14	0.044274	GO_bp:go_regulation_of_nitric_oxide_synthase_activity
GO_bp:go_regulation_of...	191	0.117	0.0121	0.069	0.044448	GO_bp:go_regulation_of_transmembrane_receptor_protein_serine_threonine_kinase_signaling_pathway
Curated_gene_sets:yeme...	9	0.538	0.0121	0.316	0.044493	Curated_gene_sets:yemelyanov_gr_targets_dn
GO_bp:go_regulation_of...	89	0.178	0.0126	0.104	0.044524	GO_bp:go_regulation_of_lipid_transport
Curated_gene_sets:kegg...	79	0.182	0.0121	0.107	0.044635	Curated_gene_sets:kegg_progesterone_mediated_oocyte_maturation
Curated_gene_sets:farm...	18	0.378	0.0121	0.223	0.044882	Curated_gene_sets:farmer_breast_cancer_cluster_5
Curated_gene_sets:zwan...	452	0.0768	0.0121	0.0453	0.045085	Curated_gene_sets:zwang_class_1_transiently_induced_by_egf
GO_bp:go_histone_h3_k4...	13	0.425	0.0115	0.251	0.045124	GO_bp:go_histone_h3_k4_trimethylation
GO_bp:go_regulation_of...	20	0.384	0.0129	0.227	0.045313	GO_bp:go_regulation_of_transcription_from_rna_polymerase_i_promoter
GO_bp:go_cerebral_cort...	19	0.386	0.0126	0.228	0.04532	GO_bp:go_cerebral_cortex_neuron_differentiation
GO_bp:go_protein_local...	13	0.442	0.012	0.262	0.045449	GO_bp:go_protein_localization_to_chromatin
GO_bp:go_detection_of_...	16	0.431	0.013	0.255	0.045451	GO_bp:go_detection_of_temperature_stimulus
Curated_gene_sets:smir...	106	0.154	0.0119	0.0912	0.045468	Curated_gene_sets:smirnov_response_to_ir_6hr_dn
Curated_gene_sets:wang...	25	0.353	0.0133	0.209	0.045507	Curated_gene_sets:wang_response_to_androgen_up
GO_bp:go_positive_regu...	55	0.217	0.0121	0.128	0.045728	GO_bp:go_positive_regulation_of_cytokine_biosynthetic_process
GO_bp:go_regulation_of...	187	0.119	0.0122	0.0707	0.045745	GO_bp:go_regulation_of_muscle_system_process
GO_bp:go_positive_regu...	23	0.334	0.012	0.198	0.04577	GO_bp:go_positive_regulation_of_steroid_metabolic_process
GO_bp:go_regulation_of...	260	0.0993	0.012	0.0589	0.045787	GO_bp:go_regulation_of_protein_modification_by_small_protein_conjugation_or_removal
Curated_gene_sets:bonc...	90	0.169	0.012	0.1	0.045908	Curated_gene_sets:bonci_targets_of_mir15a_and_mir16_1
GO_bp:go_mesenchymal_c...	122	0.151	0.0125	0.0898	0.045953	GO_bp:go_mesenchymal_cell_differentiation
Curated_gene_sets:han_...	368	0.0851	0.0121	0.0505	0.045963	Curated_gene_sets:han_satb1_targets_up
GO_bp:go_negative_regu...	49	0.234	0.0123	0.139	0.046078	GO_bp:go_negative_regulation_of_calcium_ion_transport
Curated_gene_sets:four...	19	0.366	0.012	0.218	0.046198	Curated_gene_sets:fournier_acinar_development_early_up
GO_bp:go_forebrain_dev...	331	0.0903	0.0122	0.0537	0.04625	GO_bp:go_forebrain_development
GO_mf:go_organic_catio...	15	0.447	0.013	0.266	0.046293	GO_mf:go_organic_cation_transmembrane_transporter_activity
GO_bp:go_regulation_of...	205	0.117	0.0125	0.0695	0.046309	GO_bp:go_regulation_of_gene_expression_epigenetic
Curated_gene_sets:scia...	28	0.33	0.0131	0.196	0.046466	Curated_gene_sets:scian_inversed_targets_of_tp53_and_tp73_dn
GO_bp:go_regulation_of...	36	0.278	0.0125	0.165	0.046525	GO_bp:go_regulation_of_sterol_transport
GO_bp:go_regulation_of...	36	0.278	0.0125	0.165	0.046525	GO_bp:go_regulation_of_cholesterol_transport
Curated_gene_sets:dura...	265	0.1	0.0122	0.0597	0.046666	Curated_gene_sets:durand_stroma_s_up
Curated_gene_sets:boya...	63	0.205	0.0122	0.122	0.046718	Curated_gene_sets:boyault_liver_cancer_subclass_g6_up
Curated_gene_sets:lee_...	53	0.203	0.0111	0.121	0.046737	Curated_gene_sets:lee_liver_cancer_myc_e2f1_up
Curated_gene_sets:st_f...	59	0.185	0.0107	0.11	0.046797	Curated_gene_sets:st_fas_signaling_pathway
Curated_gene_sets:naka...	23	0.299	0.0108	0.178	0.046994	Curated_gene_sets:nakamura_cancer_microenvironment_up
GO_bp:go_positive_regu...	21	0.356	0.0123	0.212	0.046997	GO_bp:go_positive_regulation_of_smoothened_signaling_pathway
GO_mf:go_rna_polymeras...	100	0.163	0.0122	0.0974	0.04704	GO_mf:go_rna_polymerase_ii_transcription_factor_binding
GO_bp:go_trna_modifica...	58	0.173	0.00992	0.104	0.047124	GO_bp:go_trna_modification
GO_bp:go_drug_metaboli...	30	0.283	0.0117	0.169	0.047145	GO_bp:go_drug_metabolic_process
GO_bp:go_glandular_epi...	18	0.399	0.0127	0.239	0.047347	GO_bp:go_glandular_epithelial_cell_development
Curated_gene_sets:nais...	7	0.674	0.0134	0.404	0.047544	Curated_gene_sets:naishiro_ctnnb1_targets_with_lef1_motif
Curated_gene_sets:malo...	37	0.246	0.0112	0.147	0.0476	Curated_gene_sets:maloney_response_to_17aag_up
Curated_gene_sets:reac...	11	0.441	0.011	0.264	0.047604	Curated_gene_sets:reactome_sema3a_plexin_repulsion_signaling_by_inhibiting_integrin_adhesion
GO_bp:go_positive_regu...	12	0.488	0.0127	0.293	0.047656	GO_bp:go_positive_regulation_of_dendritic_spine_morphogenesis
GO_mf:go_calcium_activ...	25	0.333	0.0125	0.199	0.047689	GO_mf:go_calcium_activated_cation_channel_activity
Curated_gene_sets:reac...	19	0.373	0.0122	0.224	0.047768	Curated_gene_sets:reactome_regulation_of_gene_expression_in_beta_cells
Curated_gene_sets:smid...	6	0.621	0.0114	0.373	0.047782	Curated_gene_sets:smid_breast_cancer_relapse_in_liver_up
GO_bp:go_organic_hydro...	152	0.135	0.0125	0.0812	0.04807	GO_bp:go_organic_hydroxy_compound_transport
Curated_gene_sets:reac...	48	0.298	0.0155	0.179	0.048102	Curated_gene_sets:reactome_packaging_of_telomere_ends
GO_bp:go_negative_regu...	744	0.0586	0.0118	0.0352	0.048169	GO_bp:go_negative_regulation_of_catalytic_activity
GO_cc:go_chromosome_te...	156	0.123	0.0115	0.0739	0.04817	GO_cc:go_chromosome_telomeric_region
GO_mf:go_atpase_activa...	18	0.354	0.0113	0.213	0.048213	GO_mf:go_atpase_activator_activity
GO_bp:go_detection_of_...	11	0.453	0.0113	0.272	0.048224	GO_bp:go_detection_of_molecule_of_bacterial_origin
GO_bp:go_membrane_depo...	59	0.205	0.0118	0.124	0.048279	GO_bp:go_membrane_depolarization
GO_bp:go_sterol_metabo...	115	0.145	0.0117	0.0876	0.048307	GO_bp:go_sterol_metabolic_process
Curated_gene_sets:mant...	42	0.254	0.0123	0.153	0.048507	Curated_gene_sets:mantovani_nfkb_targets_up
GO_bp:go_synapse_organ...	124	0.148	0.0123	0.0892	0.048669	GO_bp:go_synapse_organization
Curated_gene_sets:niko...	21	0.329	0.0113	0.199	0.048684	Curated_gene_sets:nikolsky_overconnected_in_breast_cancer
GO_bp:go_cell_death	931	0.0531	0.0119	0.032	0.048687	GO_bp:go_cell_death
GO_bp:go_regulation_of...	75	0.174	0.0113	0.105	0.049084	GO_bp:go_regulation_of_receptor_mediated_endocytosis
Curated_gene_sets:thum...	15	0.429	0.0125	0.259	0.049085	Curated_gene_sets:thum_mir21_targets_heart_disease_up
GO_bp:go_mammary_gland...	13	0.509	0.0138	0.308	0.049322	GO_bp:go_mammary_gland_epithelial_cell_proliferation
Curated_gene_sets:reac...	33	0.245	0.0106	0.148	0.049328	Curated_gene_sets:reactome_bmal1_clock_npas2_activates_circadian_expression
Curated_gene_sets:pid_...	44	0.233	0.0116	0.141	0.049336	Curated_gene_sets:pid_il6_7_pathway
GO_mf:go_chaperone_bin...	75	0.161	0.0105	0.0976	0.049351	GO_mf:go_chaperone_binding
GO_bp:go_adult_locomot...	75	0.177	0.0115	0.107	0.049453	GO_bp:go_adult_locomotory_behavior
GO_bp:go_interleukin_1...	15	0.356	0.0103	0.216	0.049524	GO_bp:go_interleukin_1_production
GO_mf:go_endonuclease_...	19	0.357	0.0117	0.216	0.049543	GO_mf:go_endonuclease_activity_active_with_either_ribo_or_deoxyribonucleic_acids_and_producing_3_phosphomonoesters
GO_bp:go_negative_regu...	28	0.306	0.0122	0.185	0.049661	GO_bp:go_negative_regulation_of_dna_biosynthetic_process
Curated_gene_sets:vili...	49	0.216	0.0114	0.131	0.049791	Curated_gene_sets:vilimas_notch1_targets_up
Curated_gene_sets:kegg...	43	0.232	0.0114	0.141	0.049933	Curated_gene_sets:kegg_glycerolipid_metabolism
Curated_gene_sets:lope...	13	0.446	0.0121	0.271	0.050004	Curated_gene_sets:lopez_mesothelioma_survival_worst_vs_best_up
GO_bp:go_neurological_...	11	0.522	0.013	0.317	0.05011	GO_bp:go_neurological_system_process_involved_in_regulation_of_systemic_arterial_blood_pressure
GO_cc:go_intrinsic_com...	127	0.14	0.0118	0.0853	0.050167	GO_cc:go_intrinsic_component_of_endoplasmic_reticulum_membrane
GO_bp:go_regulation_of...	22	0.347	0.0122	0.211	0.050257	GO_bp:go_regulation_of_dopamine_secretion
GO_bp:go_negative_regu...	58	0.197	0.0113	0.12	0.05029	GO_bp:go_negative_regulation_of_ossification
GO_bp:go_potassium_ion...	18	0.336	0.0107	0.205	0.0503	GO_bp:go_potassium_ion_homeostasis
Curated_gene_sets:kim_...	15	0.432	0.0126	0.263	0.050351	Curated_gene_sets:kim_pten_targets_up
GO_cc:go_nuclear_outer...	922	0.0525	0.0117	0.032	0.050431	GO_cc:go_nuclear_outer_membrane_endoplasmic_reticulum_membrane_network
GO_bp:go_pyrimidine_nu...	26	0.303	0.0116	0.185	0.050481	GO_bp:go_pyrimidine_nucleotide_biosynthetic_process
GO_cc:go_condensed_chr...	91	0.149	0.0107	0.0911	0.050603	GO_cc:go_condensed_chromosome_centromeric_region
GO_mf:go_channel_regul...	121	0.149	0.0123	0.0911	0.050606	GO_mf:go_channel_regulator_activity
Curated_gene_sets:sa_m...	16	0.375	0.0113	0.229	0.050637	Curated_gene_sets:sa_mmp_cytokine_connection
GO_bp:go_inflammatory_...	420	0.08	0.0122	0.0489	0.050746	GO_bp:go_inflammatory_response
GO_bp:go_positive_regu...	29	0.282	0.0114	0.172	0.050749	GO_bp:go_positive_regulation_of_vasodilation
GO_bp:go_protein_local...	13	0.457	0.0124	0.279	0.050804	GO_bp:go_protein_localization_to_chromosome_telomeric_region
Curated_gene_sets:matz...	106	0.144	0.0111	0.0877	0.050816	Curated_gene_sets:matzuk_spermatozoa
Curated_gene_sets:kuro...	7	0.639	0.0127	0.39	0.050864	Curated_gene_sets:kurokawa_liver_cancer_early_recurrence_dn
Curated_gene_sets:reac...	49	0.199	0.0105	0.122	0.050926	Curated_gene_sets:reactome_circadian_clock
GO_cc:go_postsynaptic_...	178	0.126	0.0126	0.0772	0.050939	GO_cc:go_postsynaptic_membrane
GO_bp:go_thyroid_hormo...	16	0.396	0.0119	0.242	0.051005	GO_bp:go_thyroid_hormone_metabolic_process
Curated_gene_sets:kegg...	247	0.0996	0.0117	0.061	0.051173	Curated_gene_sets:kegg_mapk_signaling_pathway
GO_bp:go_folic_acid_co...	11	0.371	0.00924	0.227	0.051249	GO_bp:go_folic_acid_containing_compound_biosynthetic_process
Curated_gene_sets:reac...	22	0.302	0.0106	0.185	0.051285	Curated_gene_sets:reactome_egfr_downregulation
Curated_gene_sets:stea...	33	0.25	0.0108	0.153	0.051315	Curated_gene_sets:stearman_tumor_field_effect_up
GO_bp:go_negative_regu...	60	0.211	0.0123	0.129	0.051317	GO_bp:go_negative_regulation_of_transporter_activity
GO_bp:go_response_to_l...	834	0.0547	0.0116	0.0337	0.051963	GO_bp:go_response_to_lipid
Curated_gene_sets:reac...	840	0.0544	0.0116	0.0335	0.052037	Curated_gene_sets:reactome_immune_system
Curated_gene_sets:pid_...	7	0.668	0.0133	0.411	0.052234	Curated_gene_sets:pid_vegf_vegfr_pathway
Curated_gene_sets:rome...	408	0.074	0.0111	0.0457	0.052513	Curated_gene_sets:rome_insulin_targets_in_muscle_up
GO_bp:go_peptidyl_glut...	10	0.455	0.0108	0.281	0.05257	GO_bp:go_peptidyl_glutamic_acid_carboxylation
GO_bp:go_protein_carbo...	10	0.455	0.0108	0.281	0.05257	GO_bp:go_protein_carboxylation
GO_bp:go_female_gamete...	92	0.155	0.0112	0.0959	0.052571	GO_bp:go_female_gamete_generation
GO_bp:go_sex_determina...	19	0.329	0.0108	0.203	0.05262	GO_bp:go_sex_determination
GO_bp:go_membrane_lipi...	108	0.155	0.0121	0.0958	0.052694	GO_bp:go_membrane_lipid_biosynthetic_process
Curated_gene_sets:schw...	14	0.444	0.0125	0.275	0.052727	Curated_gene_sets:schwab_targets_of_bmyb_polymorphic_variants_dn
GO_bp:go_positive_regu...	14	0.415	0.0117	0.256	0.052778	GO_bp:go_positive_regulation_of_striated_muscle_contraction
GO_bp:go_negative_regu...	26	0.323	0.0124	0.2	0.052781	GO_bp:go_negative_regulation_of_endothelial_cell_apoptotic_process
Curated_gene_sets:pid_...	37	0.263	0.012	0.163	0.052907	Curated_gene_sets:pid_bmp_pathway
Curated_gene_sets:zhen...	458	0.0758	0.012	0.0469	0.052919	Curated_gene_sets:zheng_bound_by_foxp3
GO_bp:go_spinal_cord_d...	100	0.167	0.0125	0.103	0.052932	GO_bp:go_spinal_cord_development
GO_bp:go_regulation_of...	304	0.0858	0.0111	0.053	0.052982	GO_bp:go_regulation_of_cell_cycle_phase_transition
Curated_gene_sets:okam...	20	0.359	0.012	0.222	0.053061	Curated_gene_sets:okamoto_liver_cancer_multicentric_occurrence_up
Curated_gene_sets:bioc...	16	0.386	0.0116	0.239	0.053185	Curated_gene_sets:biocarta_lair_pathway
GO_bp:go_cell_motility	769	0.0574	0.0117	0.0356	0.053237	GO_bp:go_cell_motility
GO_bp:go_localization_...	769	0.0574	0.0117	0.0356	0.053237	GO_bp:go_localization_of_cell
GO_bp:go_positive_regu...	26	0.285	0.0109	0.176	0.053268	GO_bp:go_positive_regulation_of_monooxygenase_activity
GO_bp:go_muscle_adapta...	27	0.299	0.0117	0.185	0.053379	GO_bp:go_muscle_adaptation
GO_bp:go_prostate_glan...	10	0.507	0.0121	0.315	0.053411	GO_bp:go_prostate_glandular_acinus_development
GO_bp:go_detection_of_...	17	0.393	0.0122	0.244	0.05367	GO_bp:go_detection_of_other_organism
GO_bp:go_neurotrophin_...	22	0.323	0.0114	0.201	0.053741	GO_bp:go_neurotrophin_signaling_pathway
GO_bp:go_response_to_r...	12	0.521	0.0136	0.324	0.0538	GO_bp:go_response_to_redox_state
GO_bp:go_exocrine_syst...	43	0.238	0.0117	0.148	0.053807	GO_bp:go_exocrine_system_development
Curated_gene_sets:elvi...	6	0.567	0.0104	0.352	0.053838	Curated_gene_sets:elvidge_hif2a_targets_up
GO_bp:go_developmental...	99	0.164	0.0122	0.102	0.053861	GO_bp:go_developmental_growth_involved_in_morphogenesis
GO_bp:go_aldehyde_cata...	11	0.602	0.015	0.374	0.053904	GO_bp:go_aldehyde_catabolic_process
GO_bp:go_cellular_mono...	92	0.154	0.0111	0.096	0.053907	GO_bp:go_cellular_monovalent_inorganic_cation_homeostasis
GO_bp:go_heterochromat...	10	0.445	0.0106	0.277	0.054026	GO_bp:go_heterochromatin_organization
GO_bp:go_protein_compl...	1041	0.0476	0.0112	0.0297	0.054277	GO_bp:go_protein_complex_biogenesis
GO_bp:go_protein_compl...	1041	0.0476	0.0112	0.0297	0.054277	GO_bp:go_protein_complex_assembly
GO_cc:go_golgi_apparat...	821	0.0543	0.0114	0.0339	0.054464	GO_cc:go_golgi_apparatus_part
GO_bp:go_negative_regu...	735	0.0573	0.0114	0.0357	0.054542	GO_bp:go_negative_regulation_of_developmental_process
GO_bp:go_protein_lipid...	20	0.312	0.0105	0.195	0.054748	GO_bp:go_protein_lipid_complex_assembly
GO_bp:go_regulation_of...	307	0.0888	0.0116	0.0555	0.054751	GO_bp:go_regulation_of_cell_morphogenesis_involved_in_differentiation
GO_bp:go_regulation_of...	445	0.0717	0.0112	0.0448	0.054759	GO_bp:go_regulation_of_cytoplasmic_transport
Curated_gene_sets:yang...	21	0.332	0.0114	0.207	0.054774	Curated_gene_sets:yang_muc2_targets_duodenum_3mo_dn
Curated_gene_sets:magr...	22	0.31	0.0109	0.194	0.054792	Curated_gene_sets:magrangeas_multiple_myeloma_igll_vs_iglk_dn
Curated_gene_sets:gros...	196	0.107	0.0112	0.0668	0.054831	Curated_gene_sets:gross_hypoxia_via_elk3_up
Curated_gene_sets:brui...	250	0.0952	0.0112	0.0595	0.054871	Curated_gene_sets:bruins_uvc_response_via_tp53_group_d
Curated_gene_sets:zwan...	202	0.111	0.0118	0.0696	0.054905	Curated_gene_sets:zwang_class_3_transiently_induced_by_egf
GO_bp:go_negative_regu...	231	0.1	0.0114	0.0627	0.054935	GO_bp:go_negative_regulation_of_kinase_activity
GO_bp:go_regulation_of...	171	0.114	0.0112	0.0713	0.054942	GO_bp:go_regulation_of_exocytosis
GO_bp:go_cellular_resp...	13	0.474	0.0129	0.297	0.055107	GO_bp:go_cellular_response_to_arsenic_containing_substance
GO_cc:go_endoplasmic_r...	1476	0.0405	0.0112	0.0254	0.055108	GO_cc:go_endoplasmic_reticulum
GO_bp:go_columnar_cubo...	47	0.224	0.0115	0.14	0.05513	GO_bp:go_columnar_cuboidal_epithelial_cell_development
GO_bp:go_regulation_of...	29	0.254	0.0103	0.16	0.055701	GO_bp:go_regulation_of_intrinsic_apoptotic_signaling_pathway_in_response_to_dna_damage
Curated_gene_sets:chem...	129	0.127	0.0108	0.0799	0.055946	Curated_gene_sets:chemnitz_response_to_prostaglandin_e2_up
Curated_gene_sets:mant...	11	0.402	0.01	0.253	0.056105	Curated_gene_sets:mantovani_nfkb_targets_dn
Curated_gene_sets:sa_g...	15	0.357	0.0104	0.225	0.056115	Curated_gene_sets:sa_g1_and_s_phases
Curated_gene_sets:verr...	18	0.324	0.0103	0.204	0.056117	Curated_gene_sets:verrecchia_response_to_tgfb1_c1
GO_bp:go_regulation_of...	1179	0.0448	0.0112	0.0282	0.056166	GO_bp:go_regulation_of_cellular_localization
GO_bp:go_osteoblast_di...	117	0.135	0.0109	0.0848	0.056374	GO_bp:go_osteoblast_differentiation
Curated_gene_sets:simb...	32	0.244	0.0104	0.154	0.056416	Curated_gene_sets:simbulan_uv_response_normal_dn
GO_bp:go_protein_local...	1659	0.0381	0.0111	0.0241	0.056455	GO_bp:go_protein_localization
Curated_gene_sets:labb...	84	0.158	0.0109	0.0999	0.056508	Curated_gene_sets:labbe_wnt3a_targets_dn
Curated_gene_sets:reac...	85	0.173	0.012	0.109	0.056521	Curated_gene_sets:reactome_transport_of_glucose_and_other_sugars_bile_salts_and_organic_acids_metal_ions_and_amine_compounds
Curated_gene_sets:iked...	8	0.616	0.0131	0.389	0.056563	Curated_gene_sets:ikeda_mir133_targets_dn
GO_bp:go_left_right_pa...	21	0.322	0.0111	0.204	0.056669	GO_bp:go_left_right_pattern_formation
Curated_gene_sets:reac...	14	0.336	0.00946	0.212	0.056671	Curated_gene_sets:reactome_tgf_beta_receptor_signaling_in_emt_epithelial_to_mesenchymal_transition
GO_bp:go_atrial_septum...	13	0.453	0.0123	0.286	0.056766	GO_bp:go_atrial_septum_morphogenesis
Curated_gene_sets:wang...	179	0.108	0.0108	0.0684	0.056845	Curated_gene_sets:wang_cisplatin_response_and_xpc_up
Curated_gene_sets:phon...	60	0.208	0.0121	0.131	0.056863	Curated_gene_sets:phong_tnf_targets_up
Curated_gene_sets:zhon...	62	0.197	0.0116	0.124	0.056867	Curated_gene_sets:zhong_response_to_azacitidine_and_tsa_dn
GO_bp:go_reactive_nitr...	19	0.342	0.0112	0.216	0.056897	GO_bp:go_reactive_nitrogen_species_metabolic_process
GO_cc:go_voltage_gated...	39	0.254	0.0119	0.161	0.057064	GO_cc:go_voltage_gated_calcium_channel_complex
GO_bp:go_regulation_of...	221	0.097	0.0108	0.0614	0.057118	GO_bp:go_regulation_of_vasculature_development
GO_bp:go_regulation_of...	33	0.263	0.0113	0.167	0.057143	GO_bp:go_regulation_of_protein_oligomerization
GO_bp:go_regulation_of...	20	0.368	0.0124	0.233	0.057179	GO_bp:go_regulation_of_execution_phase_of_apoptosis
Curated_gene_sets:pid_...	52	0.203	0.011	0.129	0.057202	Curated_gene_sets:pid_nfat_3pathway
GO_bp:go_regulation_of...	63	0.186	0.0111	0.118	0.057261	GO_bp:go_regulation_of_cell_junction_assembly
GO_bp:go_positive_regu...	18	0.3	0.00956	0.19	0.057337	GO_bp:go_positive_regulation_of_protein_export_from_nucleus
Curated_gene_sets:dely...	213	0.107	0.0116	0.0676	0.05737	Curated_gene_sets:delys_thyroid_cancer_dn
Curated_gene_sets:jaza...	58	0.197	0.0112	0.125	0.05742	Curated_gene_sets:jazag_tgfb1_signaling_via_smad4_dn
GO_bp:go_regulation_of...	67	0.191	0.0117	0.121	0.05743	GO_bp:go_regulation_of_biomineral_tissue_development
GO_bp:go_regulation_of...	17	0.355	0.011	0.225	0.057433	GO_bp:go_regulation_of_stem_cell_population_maintenance
Curated_gene_sets:liu_...	59	0.199	0.0115	0.126	0.057457	Curated_gene_sets:liu_nasopharyngeal_carcinoma
Curated_gene_sets:reac...	11	0.466	0.0116	0.296	0.057486	Curated_gene_sets:reactome_apoptosis_induced_dna_fragmentation
Curated_gene_sets:wu_h...	13	0.424	0.0115	0.269	0.057555	Curated_gene_sets:wu_hbx_targets_2_dn
Curated_gene_sets:amit...	54	0.208	0.0115	0.132	0.057673	Curated_gene_sets:amit_serum_response_240_mcf10a
GO_bp:go_urogenital_sy...	279	0.095	0.0118	0.0603	0.057676	GO_bp:go_urogenital_system_development
GO_bp:go_positive_regu...	159	0.125	0.0118	0.0794	0.057684	GO_bp:go_positive_regulation_of_erk1_and_erk2_cascade
GO_cc:go_telomere_cap_...	12	0.428	0.0111	0.272	0.057702	GO_cc:go_telomere_cap_complex
Curated_gene_sets:ivan...	278	0.0884	0.011	0.0562	0.057751	Curated_gene_sets:ivanova_hematopoiesis_stem_cell_long_term
Curated_gene_sets:bioc...	30	0.27	0.0111	0.172	0.057814	Curated_gene_sets:biocarta_il1r_pathway
GO_cc:go_interstitial_...	14	0.359	0.0101	0.228	0.057833	GO_cc:go_interstitial_matrix
Curated_gene_sets:sene...	106	0.136	0.0105	0.0867	0.057926	Curated_gene_sets:senese_hdac2_targets_up
GO_bp:go_telomere_capping	29	0.27	0.0109	0.172	0.057927	GO_bp:go_telomere_capping
Curated_gene_sets:rodr...	111	0.146	0.0115	0.0927	0.057939	Curated_gene_sets:rodrigues_dcc_targets_dn
Curated_gene_sets:reac...	26	0.303	0.0116	0.193	0.058001	Curated_gene_sets:reactome_degradation_of_the_extracellular_matrix
Curated_gene_sets:webe...	21	0.373	0.0128	0.237	0.058011	Curated_gene_sets:weber_methylated_icp_in_fibroblast
GO_bp:go_regulation_of...	23	0.321	0.0116	0.205	0.058015	GO_bp:go_regulation_of_release_of_sequestered_calcium_ion_into_cytosol_by_sarcoplasmic_reticulum
GO_cc:go_golgi_lumen	85	0.17	0.0117	0.108	0.058033	GO_cc:go_golgi_lumen
GO_bp:go_adaptive_immu...	107	0.143	0.0111	0.0908	0.058187	GO_bp:go_adaptive_immune_response_based_on_somatic_recombination_of_immune_receptors_built_from_immunoglobulin_superfamily_domains
GO_bp:go_positive_regu...	537	0.0635	0.0109	0.0405	0.058265	GO_bp:go_positive_regulation_of_organelle_organization
Curated_gene_sets:bioc...	21	0.322	0.0111	0.205	0.058274	Curated_gene_sets:biocarta_her2_pathway
Curated_gene_sets:reac...	21	0.309	0.0107	0.197	0.058334	Curated_gene_sets:reactome_apc_cdc20_mediated_degradation_of_nek2a
GO_bp:go_cellular_resp...	74	0.165	0.0107	0.106	0.058437	GO_bp:go_cellular_response_to_mechanical_stimulus
GO_bp:go_negative_regu...	118	0.131	0.0107	0.0837	0.058451	GO_bp:go_negative_regulation_of_cellular_amide_metabolic_process
GO_bp:go_response_to_s...	464	0.0698	0.0112	0.0445	0.058466	GO_bp:go_response_to_steroid_hormone
GO_bp:go_cardiac_muscl...	53	0.22	0.012	0.14	0.058496	GO_bp:go_cardiac_muscle_tissue_morphogenesis
GO_mf:go_hydrolase_act...	30	0.279	0.0115	0.178	0.05872	GO_mf:go_hydrolase_activity_acting_on_carbon_nitrogen_but_not_peptide_bonds_in_cyclic_amidines
GO_bp:go_cell_cycle_ch...	182	0.105	0.0106	0.0673	0.058743	GO_bp:go_cell_cycle_checkpoint
GO_bp:go_labyrinthine_...	15	0.373	0.0108	0.238	0.058838	GO_bp:go_labyrinthine_layer_blood_vessel_development
Curated_gene_sets:niko...	156	0.206	0.0192	0.132	0.058907	Curated_gene_sets:nikolsky_breast_cancer_11q12_q14_amplicon
Curated_gene_sets:reac...	107	0.152	0.0118	0.0972	0.059077	Curated_gene_sets:reactome_chromosome_maintenance
GO_bp:go_regulation_of...	19	0.357	0.0117	0.228	0.059085	GO_bp:go_regulation_of_neuron_projection_regeneration
Curated_gene_sets:kim_...	119	0.133	0.0109	0.0854	0.059201	Curated_gene_sets:kim_wt1_targets_8hr_dn
Curated_gene_sets:pos_...	29	0.289	0.0117	0.185	0.059271	Curated_gene_sets:pos_histamine_response_network
GO_bp:go_cellular_resp...	127	0.127	0.0107	0.0812	0.059289	GO_bp:go_cellular_response_to_radiation
GO_bp:go_multicellular...	71	0.173	0.011	0.111	0.059308	GO_bp:go_multicellular_organism_growth
GO_bp:go_camp_metaboli...	34	0.253	0.0111	0.162	0.059388	GO_bp:go_camp_metabolic_process
GO_bp:go_cellular_alde...	81	0.167	0.0113	0.107	0.05946	GO_bp:go_cellular_aldehyde_metabolic_process
GO_bp:go_high_density_...	15	0.425	0.0124	0.273	0.059464	GO_bp:go_high_density_lipoprotein_particle_remodeling
GO_bp:go_bone_trabecul...	10	0.528	0.0125	0.338	0.059485	GO_bp:go_bone_trabecula_morphogenesis
GO_bp:go_regulation_of...	325	0.08	0.0107	0.0513	0.059492	GO_bp:go_regulation_of_cellular_amide_metabolic_process
Curated_gene_sets:benp...	724	0.0537	0.0106	0.0344	0.059548	Curated_gene_sets:benporath_myc_max_targets
GO_bp:go_detection_of_...	11	0.458	0.0114	0.294	0.059616	GO_bp:go_detection_of_calcium_ion
GO_bp:go_positive_regu...	150	0.116	0.0107	0.0746	0.059703	GO_bp:go_positive_regulation_of_immune_effector_process
GO_bp:go_acrosome_asse...	12	0.357	0.00929	0.229	0.059798	GO_bp:go_acrosome_assembly
GO_bp:go_negative_regu...	23	0.375	0.0135	0.241	0.059829	GO_bp:go_negative_regulation_of_retinoic_acid_receptor_signaling_pathway
GO_bp:go_regulation_of...	206	0.104	0.0112	0.067	0.059844	GO_bp:go_regulation_of_cellular_response_to_growth_factor_stimulus
GO_bp:go_negative_regu...	16	0.327	0.00984	0.21	0.059912	GO_bp:go_negative_regulation_of_interleukin_8_production
GO_bp:go_retinal_gangl...	17	0.406	0.0126	0.261	0.059932	GO_bp:go_retinal_ganglion_cell_axon_guidance
Curated_gene_sets:tang...	52	0.185	0.01	0.119	0.05995	Curated_gene_sets:tang_senescence_tp53_targets_dn
Curated_gene_sets:reac...	162	0.118	0.0112	0.0758	0.060072	Curated_gene_sets:reactome_post_translational_protein_modification
GO_bp:go_positive_regu...	36	0.234	0.0105	0.151	0.060358	GO_bp:go_positive_regulation_of_tyrosine_phosphorylation_of_stat3_protein
GO_bp:go_establishment...	13	0.451	0.0122	0.29	0.060369	GO_bp:go_establishment_of_protein_localization_to_chromosome
GO_mf:go_cargo_recepto...	61	0.182	0.0107	0.117	0.060387	GO_mf:go_cargo_receptor_activity
GO_bp:go_positive_regu...	99	0.151	0.0112	0.0972	0.060546	GO_bp:go_positive_regulation_of_calcium_ion_transport
Curated_gene_sets:abe_...	19	0.325	0.0107	0.21	0.060621	Curated_gene_sets:abe_vegfa_targets
GO_bp:go_negative_regu...	31	0.256	0.0107	0.165	0.060645	GO_bp:go_negative_regulation_of_extrinsic_apoptotic_signaling_pathway_in_absence_of_ligand
GO_bp:go_negative_regu...	31	0.256	0.0107	0.165	0.060645	GO_bp:go_negative_regulation_of_signal_transduction_in_absence_of_ligand
GO_bp:go_stem_cell_dif...	173	0.118	0.0116	0.0759	0.060697	GO_bp:go_stem_cell_differentiation
GO_bp:go_branching_mor...	125	0.135	0.0113	0.0874	0.060842	GO_bp:go_branching_morphogenesis_of_an_epithelial_tube
Curated_gene_sets:haht...	167	0.117	0.0114	0.0759	0.060931	Curated_gene_sets:hahtola_mycosis_fungoides_skin_up
Curated_gene_sets:affa...	211	0.0996	0.0108	0.0644	0.060982	Curated_gene_sets:affar_yy1_targets_dn
GO_bp:go_negative_regu...	35	0.265	0.0118	0.171	0.060995	GO_bp:go_negative_regulation_of_response_to_extracellular_stimulus
GO_bp:go_negative_regu...	35	0.265	0.0118	0.171	0.060995	GO_bp:go_negative_regulation_of_response_to_nutrient_levels
Curated_gene_sets:lein...	67	0.188	0.0115	0.121	0.061166	Curated_gene_sets:lein_midbrain_markers
GO_bp:go_pituitary_gla...	37	0.239	0.0109	0.155	0.061217	GO_bp:go_pituitary_gland_development
GO_bp:go_regulation_of...	543	0.0656	0.0113	0.0425	0.061313	GO_bp:go_regulation_of_ion_transport
GO_bp:go_negative_regu...	20	0.295	0.00991	0.191	0.061365	GO_bp:go_negative_regulation_of_cytokine_production_involved_in_immune_response
Curated_gene_sets:scia...	11	0.513	0.0128	0.332	0.061374	Curated_gene_sets:scian_inversed_targets_of_tp53_and_tp73_up
GO_bp:go_post_embryoni...	14	0.435	0.0122	0.282	0.061381	GO_bp:go_post_embryonic_organ_development
GO_bp:go_manganese_ion...	12	0.426	0.0111	0.276	0.061382	GO_bp:go_manganese_ion_transport
Curated_gene_sets:busa...	6	0.649	0.0119	0.42	0.061406	Curated_gene_sets:busa_sam68_targets_dn
Curated_gene_sets:reac...	12	0.432	0.0113	0.28	0.061412	Curated_gene_sets:reactome_trafficking_of_glur2_containing_ampa_receptors
Curated_gene_sets:bioc...	8	0.497	0.0106	0.322	0.061479	Curated_gene_sets:biocarta_plateletapp_pathway
Curated_gene_sets:matz...	14	0.367	0.0103	0.238	0.061551	Curated_gene_sets:matzuk_ovulation
Curated_gene_sets:reac...	11	0.546	0.0136	0.354	0.061591	Curated_gene_sets:reactome_signal_regulatory_protein_sirp_family_interactions
GO_bp:go_regulation_of...	17	0.36	0.0112	0.234	0.06164	GO_bp:go_regulation_of_histone_h3_k9_methylation
Curated_gene_sets:li_i...	289	0.085	0.0108	0.0552	0.06169	Curated_gene_sets:li_induced_t_to_natural_killer_up
GO_bp:go_histone_methy...	78	0.152	0.0101	0.0986	0.061714	GO_bp:go_histone_methylation
Curated_gene_sets:garg...	22	0.32	0.0113	0.208	0.061727	Curated_gene_sets:gargalovic_response_to_oxidized_phospholipids_green_dn
Curated_gene_sets:hori...	286	0.0845	0.0107	0.0549	0.061803	Curated_gene_sets:horiuchi_wtap_targets_dn
GO_bp:go_response_to_l...	19	0.306	0.01	0.199	0.061845	GO_bp:go_response_to_leptin
Curated_gene_sets:niko...	31	0.546	0.0228	0.355	0.061977	Curated_gene_sets:nikolsky_breast_cancer_20q11_amplicon
GO_bp:go_regulation_of...	12	0.406	0.0106	0.264	0.061997	GO_bp:go_regulation_of_brown_fat_cell_differentiation
Curated_gene_sets:boch...	395	0.0728	0.0107	0.0473	0.062061	Curated_gene_sets:bochkis_foxa2_targets
GO_bp:go_startle_response	23	0.315	0.0113	0.205	0.062189	GO_bp:go_startle_response
Curated_gene_sets:royl...	24	0.413	0.0152	0.269	0.062271	Curated_gene_sets:roylance_breast_cancer_16q_copy_number_dn
Curated_gene_sets:reac...	13	0.372	0.0101	0.242	0.06232	Curated_gene_sets:reactome_spry_regulation_of_fgf_signaling
Curated_gene_sets:niko...	37	0.385	0.0176	0.251	0.062369	Curated_gene_sets:nikolsky_breast_cancer_7p22_amplicon
Curated_gene_sets:gavi...	17	0.369	0.0114	0.24	0.062549	Curated_gene_sets:gavin_il2_responsive_foxp3_targets_up
GO_bp:go_inactivation_...	23	0.302	0.0109	0.197	0.062654	GO_bp:go_inactivation_of_mapk_activity
Curated_gene_sets:moot...	7	0.517	0.0103	0.337	0.062877	Curated_gene_sets:mootha_ros
Curated_gene_sets:davi...	165	0.12	0.0115	0.0782	0.062905	Curated_gene_sets:davicioni_molecular_arms_vs_erms_dn
GO_bp:go_adherens_junc...	69	0.175	0.0109	0.114	0.062936	GO_bp:go_adherens_junction_organization
GO_bp:go_regulation_of...	13	0.384	0.0104	0.251	0.062982	GO_bp:go_regulation_of_histone_h3_k9_acetylation
Curated_gene_sets:crom...	56	0.209	0.0117	0.137	0.063151	Curated_gene_sets:cromer_tumorigenesis_up
GO_bp:go_peptidyl_lysi...	279	0.0816	0.0102	0.0534	0.063275	GO_bp:go_peptidyl_lysine_modification
GO_mf:go_neurotransmit...	22	0.312	0.011	0.204	0.063283	GO_mf:go_neurotransmitter_transporter_activity
GO_bp:go_positive_regu...	35	0.225	0.00998	0.147	0.063334	GO_bp:go_positive_regulation_of_dna_repair
Curated_gene_sets:rigg...	168	0.114	0.011	0.0745	0.063344	Curated_gene_sets:riggi_ewing_sarcoma_progenitor_dn
GO_bp:go_negative_regu...	13	0.441	0.012	0.289	0.063373	GO_bp:go_negative_regulation_of_macrophage_derived_foam_cell_differentiation
GO_mf:go_dna_polymeras...	12	0.444	0.0116	0.291	0.063434	GO_mf:go_dna_polymerase_binding
Curated_gene_sets:yao_...	61	0.192	0.0113	0.126	0.063516	Curated_gene_sets:yao_temporal_response_to_progesterone_cluster_1
GO_bp:go_regulation_of...	43	0.21	0.0103	0.138	0.063522	GO_bp:go_regulation_of_tyrosine_phosphorylation_of_stat3_protein
Curated_gene_sets:naka...	28	0.259	0.0103	0.17	0.06369	Curated_gene_sets:nakayama_fgf2_targets
GO_bp:go_lipid_homeost...	107	0.133	0.0103	0.0875	0.063698	GO_bp:go_lipid_homeostasis
Curated_gene_sets:reac...	22	0.28	0.00986	0.183	0.063725	Curated_gene_sets:reactome_rora_activates_circadian_expression
GO_bp:go_cardiac_atriu...	30	0.285	0.0117	0.187	0.063729	GO_bp:go_cardiac_atrium_development
GO_cc:go_perinuclear_e...	12	0.446	0.0116	0.293	0.063881	GO_cc:go_perinuclear_endoplasmic_reticulum
GO_bp:go_regulation_of...	62	0.174	0.0103	0.114	0.063886	GO_bp:go_regulation_of_cell_killing
Curated_gene_sets:grah...	10	0.482	0.0115	0.317	0.064074	Curated_gene_sets:graham_cml_quiescent_vs_normal_dividing_dn
GO_bp:go_protein_expor...	29	0.229	0.00925	0.15	0.064233	GO_bp:go_protein_export_from_nucleus
Curated_gene_sets:wier...	52	0.194	0.0105	0.128	0.06425	Curated_gene_sets:wierenga_stat5a_targets_group2
Curated_gene_sets:sand...	14	0.323	0.00908	0.212	0.064274	Curated_gene_sets:sanderson_ppara_targets
GO_mf:go_deaminase_act...	30	0.26	0.0107	0.171	0.064427	GO_mf:go_deaminase_activity
Curated_gene_sets:reac...	10	0.418	0.00994	0.276	0.064575	Curated_gene_sets:reactome_calnexin_calreticulin_cycle
GO_bp:go_regulation_of...	575	0.0617	0.0109	0.0407	0.064695	GO_bp:go_regulation_of_growth
Curated_gene_sets:bioc...	11	0.405	0.0101	0.267	0.064737	Curated_gene_sets:biocarta_cd40_pathway
GO_bp:go_regulation_of...	59	0.184	0.0106	0.122	0.064758	GO_bp:go_regulation_of_protein_acetylation
GO_bp:go_positive_regu...	13	0.394	0.0107	0.26	0.06494	GO_bp:go_positive_regulation_of_extrinsic_apoptotic_signaling_pathway_in_absence_of_ligand
GO_bp:go_positive_regu...	27	0.288	0.0113	0.19	0.065059	GO_bp:go_positive_regulation_of_heart_growth
GO_bp:go_regulation_of...	45	0.207	0.0104	0.137	0.06518	GO_bp:go_regulation_of_myoblast_differentiation
GO_bp:go_establishment...	30	0.259	0.0107	0.171	0.065215	GO_bp:go_establishment_of_protein_localization_to_vacuole
Curated_gene_sets:fuku...	15	0.425	0.0124	0.281	0.065249	Curated_gene_sets:fukushima_tnfsf11_targets
GO_bp:go_cellular_resp...	109	0.139	0.0109	0.0921	0.065299	GO_bp:go_cellular_response_to_alcohol
Curated_gene_sets:nuno...	13	0.322	0.00873	0.213	0.065361	Curated_gene_sets:nunoda_response_to_dasatinib_imatinib_dn
GO_bp:go_embryonic_for...	31	0.283	0.0119	0.188	0.065523	GO_bp:go_embryonic_forelimb_morphogenesis
GO_mf:go_monooxygenase...	88	0.163	0.0115	0.108	0.065963	GO_mf:go_monooxygenase_activity
GO_bp:go_methylation_d...	9	0.44	0.00992	0.292	0.066147	GO_bp:go_methylation_dependent_chromatin_silencing
GO_mf:go_gamma_tubulin...	23	0.323	0.0117	0.215	0.066206	GO_mf:go_gamma_tubulin_binding
GO_bp:go_regulation_of...	686	0.0557	0.0107	0.037	0.066257	GO_bp:go_regulation_of_nervous_system_development
Curated_gene_sets:sene...	209	0.0961	0.0104	0.0639	0.066339	Curated_gene_sets:senese_hdac1_and_hdac2_targets_up
GO_bp:go_regulation_of...	116	0.138	0.0111	0.0919	0.066339	GO_bp:go_regulation_of_g_protein_coupled_receptor_protein_signaling_pathway
GO_mf:go_histone_acety...	26	0.275	0.0106	0.183	0.066506	GO_mf:go_histone_acetyltransferase_binding
GO_bp:go_trna_processing	110	0.12	0.00942	0.0798	0.066558	GO_bp:go_trna_processing
GO_mf:go_demethylase_a...	28	0.271	0.0108	0.181	0.066651	GO_mf:go_demethylase_activity
Curated_gene_sets:purb...	170	0.106	0.0104	0.0708	0.066714	Curated_gene_sets:purbey_targets_of_ctbp1_and_satb1_dn
GO_bp:go_negative_regu...	900	0.0482	0.0106	0.0322	0.066787	GO_bp:go_negative_regulation_of_multicellular_organismal_process
Curated_gene_sets:reac...	16	0.351	0.0106	0.234	0.066799	Curated_gene_sets:reactome_inflammasomes
GO_bp:go_positive_regu...	118	0.128	0.0104	0.0853	0.066871	GO_bp:go_positive_regulation_of_mitotic_cell_cycle
GO_mf:go_drug_binding	101	0.146	0.011	0.0974	0.066951	GO_mf:go_drug_binding
GO_cc:go_golgi_cistern...	65	0.173	0.0104	0.115	0.066967	GO_cc:go_golgi_cisterna_membrane
Curated_gene_sets:kalm...	10	0.389	0.00926	0.26	0.067118	Curated_gene_sets:kalma_e2f1_targets
Curated_gene_sets:verh...	154	0.114	0.0106	0.0761	0.067459	Curated_gene_sets:verhaak_glioblastoma_proneural
GO_cc:go_mhc_class_ii_...	14	0.522	0.0147	0.35	0.067553	GO_cc:go_mhc_class_ii_protein_complex
GO_bp:go_lysosomal_tra...	64	0.173	0.0104	0.116	0.067671	GO_bp:go_lysosomal_transport
GO_bp:go_cholesterol_e...	26	0.283	0.0108	0.19	0.067726	GO_bp:go_cholesterol_efflux
GO_bp:go_extracellular...	13	0.363	0.00984	0.243	0.067734	GO_bp:go_extracellular_negative_regulation_of_signal_transduction
GO_bp:go_extracellular...	13	0.363	0.00984	0.243	0.067734	GO_bp:go_extracellular_regulation_of_signal_transduction
GO_bp:go_cranial_skele...	54	0.202	0.0111	0.135	0.067879	GO_bp:go_cranial_skeletal_system_development
GO_bp:go_t_cell_homeos...	30	0.248	0.0102	0.166	0.067953	GO_bp:go_t_cell_homeostasis
GO_bp:go_angiogenesis	272	0.0856	0.0105	0.0574	0.067961	GO_bp:go_angiogenesis
GO_bp:go_leukocyte_hom...	55	0.186	0.0104	0.125	0.067975	GO_bp:go_leukocyte_homeostasis
Curated_gene_sets:rute...	375	0.0756	0.0109	0.0507	0.068007	Curated_gene_sets:rutella_response_to_hgf_vs_csf2rb_and_il4_up
Curated_gene_sets:reac...	60	0.179	0.0104	0.12	0.06805	Curated_gene_sets:reactome_immunoregulatory_interactions_between_a_lymphoid_and_a_non_lymphoid_cell
GO_bp:go_salivary_glan...	30	0.271	0.0111	0.182	0.06805	GO_bp:go_salivary_gland_development
Curated_gene_sets:garg...	21	0.326	0.0112	0.219	0.068106	Curated_gene_sets:gargalovic_response_to_oxidized_phospholipids_green_up
Curated_gene_sets:yagu...	6	0.596	0.011	0.4	0.068148	Curated_gene_sets:yague_pretumor_drug_resistance_up
GO_bp:go_ovarian_folli...	56	0.195	0.011	0.131	0.068239	GO_bp:go_ovarian_follicle_development
GO_cc:go_swi_snf_super...	67	0.168	0.0103	0.113	0.068284	GO_cc:go_swi_snf_superfamily_type_complex
GO_bp:go_spleen_develo...	38	0.229	0.0106	0.154	0.068452	GO_bp:go_spleen_development
Curated_gene_sets:malo...	71	0.175	0.0111	0.118	0.068577	Curated_gene_sets:maloney_response_to_17aag_dn
Curated_gene_sets:rute...	293	0.0832	0.0106	0.0559	0.068579	Curated_gene_sets:rutella_response_to_csf2rb_and_il4_dn
Curated_gene_sets:mits...	392	0.0708	0.0104	0.0476	0.068621	Curated_gene_sets:mitsiades_response_to_aplidin_up
GO_bp:go_establishment...	1309	0.0397	0.0104	0.0267	0.068838	GO_bp:go_establishment_of_protein_localization
Curated_gene_sets:kim_...	96	0.133	0.00977	0.0896	0.068917	Curated_gene_sets:kim_gastric_cancer_chemosensitivity
Curated_gene_sets:reac...	13	0.404	0.0109	0.272	0.068956	Curated_gene_sets:reactome_translocation_of_zap_70_to_immunological_synapse
Curated_gene_sets:begu...	42	0.237	0.0115	0.16	0.069027	Curated_gene_sets:begum_targets_of_pax3_foxo1_fusion_dn
GO_cc:go_nuclear_perip...	109	0.136	0.0106	0.0914	0.069036	GO_cc:go_nuclear_periphery
GO_bp:go_drug_transport	24	0.299	0.011	0.202	0.069054	GO_bp:go_drug_transport
GO_bp:go_melanin_metab...	13	0.361	0.00979	0.244	0.069184	GO_bp:go_melanin_metabolic_process
Curated_gene_sets:kond...	21	0.345	0.0119	0.233	0.069221	Curated_gene_sets:kondo_colon_cancer_hcp_with_h3k27me1
GO_bp:go_response_to_pain	29	0.267	0.0108	0.18	0.069226	GO_bp:go_response_to_pain
GO_mf:go_receptor_acti...	1465	0.0434	0.012	0.0293	0.069228	GO_mf:go_receptor_activity
GO_bp:go_chromatin_mod...	478	0.0627	0.0102	0.0424	0.069249	GO_bp:go_chromatin_modification
GO_bp:go_regulation_of...	39	0.234	0.011	0.158	0.069401	GO_bp:go_regulation_of_potassium_ion_transmembrane_transporter_activity
GO_bp:go_cellular_resp...	434	0.0682	0.0106	0.0461	0.06941	GO_bp:go_cellular_response_to_lipid
GO_bp:go_organophospha...	421	0.0669	0.0102	0.0452	0.069416	GO_bp:go_organophosphate_biosynthetic_process
Curated_gene_sets:der_...	6	0.498	0.00916	0.336	0.069528	Curated_gene_sets:der_ifn_beta_response_dn
GO_bp:go_locomotion	1033	0.0457	0.0107	0.0309	0.069546	GO_bp:go_locomotion
GO_mf:go_peroxisome_pr...	14	0.356	0.01	0.241	0.0696	GO_mf:go_peroxisome_proliferator_activated_receptor_binding
GO_bp:go_er_to_golgi_v...	158	0.11	0.0104	0.0748	0.069938	GO_bp:go_er_to_golgi_vesicle_mediated_transport
Curated_gene_sets:smid...	641	0.0568	0.0106	0.0385	0.070011	Curated_gene_sets:smid_breast_cancer_basal_dn
GO_bp:go_regulation_of...	25	0.264	0.00993	0.179	0.070048	GO_bp:go_regulation_of_protein_localization_to_cell_surface
GO_bp:go_hematopoietic...	96	0.143	0.0105	0.0967	0.070069	GO_bp:go_hematopoietic_progenitor_cell_differentiation
GO_bp:go_positive_regu...	11	0.449	0.0112	0.304	0.07009	GO_bp:go_positive_regulation_of_synapse_maturation
GO_mf:go_macrolide_bin...	18	0.304	0.00968	0.206	0.070129	GO_mf:go_macrolide_binding
GO_mf:go_fk506_binding	18	0.304	0.00968	0.206	0.070129	GO_mf:go_fk506_binding
GO_bp:go_cellular_macr...	662	0.0537	0.0102	0.0364	0.070139	GO_bp:go_cellular_macromolecular_complex_assembly
Curated_gene_sets:reac...	25	0.314	0.0118	0.213	0.070193	Curated_gene_sets:reactome_pre_notch_transcription_and_translation
GO_cc:go_mediator_complex	32	0.228	0.00969	0.155	0.070209	GO_cc:go_mediator_complex
GO_mf:go_mhc_class_ii_...	10	0.446	0.0106	0.303	0.070599	GO_mf:go_mhc_class_ii_receptor_activity
GO_bp:go_mesenchyme_de...	171	0.112	0.011	0.0763	0.070616	GO_bp:go_mesenchyme_development
GO_cc:go_dna_packaging...	99	0.197	0.0147	0.134	0.070791	GO_cc:go_dna_packaging_complex
Curated_gene_sets:enk_...	485	0.0636	0.0104	0.0433	0.070843	Curated_gene_sets:enk_uv_response_epidermis_dn
GO_bp:go_negative_regu...	12	0.41	0.0107	0.28	0.071148	GO_bp:go_negative_regulation_of_interleukin_1_beta_production
Curated_gene_sets:yagi...	322	0.0769	0.0103	0.0524	0.071208	Curated_gene_sets:yagi_aml_with_11q23_rearranged
GO_bp:go_negative_regu...	57	0.194	0.011	0.132	0.07159	GO_bp:go_negative_regulation_of_cation_transmembrane_transport
Curated_gene_sets:amun...	19	0.307	0.0101	0.21	0.07167	Curated_gene_sets:amundson_gamma_radiation_resistance
GO_mf:go_iron_ion_binding	145	0.119	0.0107	0.0814	0.071675	GO_mf:go_iron_ion_binding
Curated_gene_sets:bioc...	15	0.328	0.00954	0.224	0.07168	Curated_gene_sets:biocarta_pml_pathway
GO_bp:go_cellular_resp...	11	0.317	0.00791	0.217	0.071751	GO_bp:go_cellular_response_to_ethanol
GO_bp:go_nicotinamide_...	18	0.295	0.0094	0.202	0.071834	GO_bp:go_nicotinamide_nucleotide_biosynthetic_process
GO_bp:go_pyridine_nucl...	18	0.295	0.0094	0.202	0.071834	GO_bp:go_pyridine_nucleotide_biosynthetic_process
GO_bp:go_negative_regu...	38	0.227	0.0105	0.155	0.071841	GO_bp:go_negative_regulation_of_chromatin_modification
GO_bp:go_regulation_of...	868	0.0481	0.0104	0.0329	0.07191	GO_bp:go_regulation_of_response_to_external_stimulus
GO_mf:go_polysaccharid...	21	0.295	0.0101	0.202	0.071974	GO_mf:go_polysaccharide_binding
GO_bp:go_regulation_of...	717	0.0522	0.0103	0.0357	0.072018	GO_bp:go_regulation_of_kinase_activity
GO_bp:go_negative_regu...	969	0.0451	0.0103	0.0309	0.072177	GO_bp:go_negative_regulation_of_molecular_function
GO_cc:go_er_to_golgi_t...	51	0.202	0.0108	0.139	0.072221	GO_cc:go_er_to_golgi_transport_vesicle_membrane
GO_bp:go_negative_regu...	94	0.142	0.0103	0.0974	0.072228	GO_bp:go_negative_regulation_of_immune_effector_process
Curated_gene_sets:lee_...	161	0.105	0.00994	0.0718	0.072621	Curated_gene_sets:lee_liver_cancer_survival_dn
GO_bp:go_organelle_fis...	466	0.0613	0.00981	0.0421	0.072634	GO_bp:go_organelle_fission
GO_bp:go_membrane_hype...	10	0.442	0.0105	0.303	0.072676	GO_bp:go_membrane_hyperpolarization
GO_bp:go_protein_local...	10	0.469	0.0111	0.322	0.072722	GO_bp:go_protein_localization_to_kinetochore
GO_bp:go_tube_morphoge...	304	0.0805	0.0105	0.0553	0.072723	GO_bp:go_tube_morphogenesis
GO_bp:go_replicative_s...	12	0.4	0.0104	0.275	0.072847	GO_bp:go_replicative_senescence
GO_bp:go_positive_regu...	18	0.36	0.0115	0.247	0.072923	GO_bp:go_positive_regulation_of_microtubule_polymerization
GO_bp:go_lymphangiogen...	10	0.401	0.00954	0.276	0.073082	GO_bp:go_lymphangiogenesis
Curated_gene_sets:kegg...	50	0.191	0.0101	0.132	0.073171	Curated_gene_sets:kegg_hedgehog_signaling_pathway
Curated_gene_sets:reac...	75	0.151	0.00982	0.104	0.073174	Curated_gene_sets:reactome_integrin_cell_surface_interactions
Curated_gene_sets:lund...	14	0.375	0.0105	0.258	0.073283	Curated_gene_sets:lund_silenced_by_methylation
GO_bp:go_indole_contai...	21	0.286	0.00984	0.197	0.073379	GO_bp:go_indole_containing_compound_metabolic_process
Curated_gene_sets:reac...	69	0.162	0.0101	0.111	0.073393	Curated_gene_sets:reactome_platelet_homeostasis
Curated_gene_sets:bioc...	9	0.429	0.00966	0.295	0.073415	Curated_gene_sets:biocarta_il4_pathway
Curated_gene_sets:whit...	44	0.184	0.00916	0.127	0.073417	Curated_gene_sets:whitfield_cell_cycle_literature
GO_bp:go_regulation_of...	225	0.093	0.0104	0.0641	0.073422	GO_bp:go_regulation_of_organ_morphogenesis
GO_cc:go_external_side...	202	0.0952	0.0101	0.0657	0.073524	GO_cc:go_external_side_of_plasma_membrane
Curated_gene_sets:tagh...	12	0.379	0.00986	0.261	0.073528	Curated_gene_sets:taghavi_neoplastic_transformation
GO_bp:go_lymphocyte_ac...	90	0.158	0.0112	0.109	0.073588	GO_bp:go_lymphocyte_activation_involved_in_immune_response
GO_bp:go_atrial_septum...	17	0.357	0.0111	0.246	0.073613	GO_bp:go_atrial_septum_development
Curated_gene_sets:smid...	15	0.347	0.0101	0.239	0.073659	Curated_gene_sets:smid_breast_cancer_luminal_a_dn
Curated_gene_sets:dair...	104	0.129	0.00988	0.0892	0.073688	Curated_gene_sets:dairkee_cancer_prone_response_bpa_e2
GO_bp:go_inflammatory_...	24	0.304	0.0112	0.21	0.073855	GO_bp:go_inflammatory_response_to_antigenic_stimulus
GO_bp:go_regulation_of...	55	0.182	0.0101	0.126	0.07391	GO_bp:go_regulation_of_intracellular_steroid_hormone_receptor_signaling_pathway
GO_bp:go_adaptive_immu...	231	0.0937	0.0106	0.0648	0.073933	GO_bp:go_adaptive_immune_response
GO_bp:go_aminoglycan_c...	63	0.17	0.0101	0.117	0.073933	GO_bp:go_aminoglycan_catabolic_process
Curated_gene_sets:shan...	10	0.398	0.00946	0.275	0.073961	Curated_gene_sets:shank_tal1_targets_dn
GO_bp:go_extrinsic_apo...	93	0.147	0.0106	0.101	0.074024	GO_bp:go_extrinsic_apoptotic_signaling_pathway
GO_bp:go_spindle_check...	24	0.277	0.0102	0.192	0.074124	GO_bp:go_spindle_checkpoint
Curated_gene_sets:zhu_...	19	0.327	0.0107	0.227	0.074361	Curated_gene_sets:zhu_skil_targets_up
GO_bp:go_positive_regu...	15	0.336	0.00978	0.233	0.074385	GO_bp:go_positive_regulation_of_sodium_ion_transmembrane_transport
Curated_gene_sets:niko...	11	0.998	0.0249	0.691	0.074466	Curated_gene_sets:nikolsky_breast_cancer_7p15_amplicon
Curated_gene_sets:pid_...	32	0.236	0.01	0.164	0.074565	Curated_gene_sets:pid_atm_pathway
Curated_gene_sets:benp...	136	0.111	0.00973	0.0772	0.074581	Curated_gene_sets:benporath_proliferation
Curated_gene_sets:calv...	4	0.964	0.0145	0.669	0.074665	Curated_gene_sets:calvet_irinotecan_sensitive_vs_resistant_up
Curated_gene_sets:pid_...	13	0.39	0.0106	0.271	0.074822	Curated_gene_sets:pid_tcr_jnk_pathway
GO_mf:go_hormone_recep...	157	0.111	0.0104	0.077	0.075062	GO_mf:go_hormone_receptor_binding
Curated_gene_sets:beie...	33	0.23	0.00991	0.16	0.075085	Curated_gene_sets:beier_glioma_stem_cell_up
Curated_gene_sets:chia...	78	0.154	0.0102	0.107	0.075091	Curated_gene_sets:chiang_liver_cancer_subclass_unannotated_up
GO_bp:go_organophospha...	827	0.0474	0.01	0.0329	0.075094	GO_bp:go_organophosphate_metabolic_process
GO_bp:go_regulation_of...	52	0.177	0.00957	0.123	0.075183	GO_bp:go_regulation_of_leukocyte_mediated_cytotoxicity
Curated_gene_sets:bioc...	23	0.267	0.00963	0.186	0.075259	Curated_gene_sets:biocarta_stress_pathway
GO_bp:go_cytochrome_co...	25	0.261	0.00979	0.181	0.075424	GO_bp:go_cytochrome_complex_assembly
GO_cc:go_neuron_spine	109	0.131	0.0102	0.0909	0.075529	GO_cc:go_neuron_spine
GO_bp:go_aging	246	0.0889	0.0104	0.0619	0.075553	GO_bp:go_aging
Curated_gene_sets:reac...	7	0.411	0.00817	0.286	0.075602	Curated_gene_sets:reactome_irak2_mediated_activation_of_tak1_complex_upon_tlr7_8_or_9_stimulation
Curated_gene_sets:gilm...	13	0.334	0.00904	0.232	0.075644	Curated_gene_sets:gilmore_core_nfkb_pathway
GO_mf:go_s_acyltransfe...	26	0.239	0.00916	0.167	0.075931	GO_mf:go_s_acyltransferase_activity
Curated_gene_sets:zhon...	154	0.11	0.0102	0.0767	0.076031	Curated_gene_sets:zhong_response_to_azacitidine_and_tsa_up
GO_bp:go_auditory_rece...	18	0.298	0.00952	0.208	0.076113	GO_bp:go_auditory_receptor_cell_development
GO_bp:go_regulation_of...	107	0.126	0.00976	0.0879	0.076118	GO_bp:go_regulation_of_lymphocyte_mediated_immunity
GO_cc:go_basal_lamina	17	0.315	0.00976	0.22	0.076136	GO_cc:go_basal_lamina
Curated_gene_sets:matz...	7	0.503	0.01	0.351	0.076213	Curated_gene_sets:matzuk_fertilization
Curated_gene_sets:mili...	625	0.0542	0.01	0.0379	0.076275	Curated_gene_sets:mili_pseudopodia_haptotaxis_dn
Curated_gene_sets:sene...	437	0.0661	0.0103	0.0462	0.076281	Curated_gene_sets:senese_hdac3_targets_up
Curated_gene_sets:pang...	140	0.116	0.0103	0.0812	0.076373	Curated_gene_sets:pangas_tumor_suppression_by_smad1_and_smad5_dn
GO_bp:go_cellular_resp...	49	0.201	0.0106	0.141	0.076437	GO_bp:go_cellular_response_to_amino_acid_stimulus
Curated_gene_sets:sa_f...	7	0.407	0.0081	0.285	0.076459	Curated_gene_sets:sa_fas_signaling
GO_bp:go_activation_of...	14	0.346	0.00973	0.242	0.076504	GO_bp:go_activation_of_anaphase_promoting_complex_activity
GO_bp:go_regulation_of...	14	0.297	0.00836	0.208	0.076689	GO_bp:go_regulation_of_arp2_3_complex_mediated_actin_nucleation
Curated_gene_sets:chen...	6	0.544	0.01	0.381	0.076719	Curated_gene_sets:cheng_taf7l_targets
Curated_gene_sets:labb...	100	0.13	0.00976	0.0912	0.07673	Curated_gene_sets:labbe_wnt3a_targets_up
GO_bp:go_central_nervo...	18	0.326	0.0104	0.228	0.076797	GO_bp:go_central_nervous_system_projection_neuron_axonogenesis
GO_cc:go_lumenal_side_...	26	0.289	0.0111	0.203	0.077048	GO_cc:go_lumenal_side_of_membrane
GO_mf:go_snorna_binding	24	0.234	0.00862	0.164	0.077133	GO_mf:go_snorna_binding
GO_bp:go_positive_regu...	23	0.3	0.0108	0.211	0.077213	GO_bp:go_positive_regulation_of_peptidyl_threonine_phosphorylation
GO_bp:go_negative_regu...	13	0.352	0.00953	0.247	0.077349	GO_bp:go_negative_regulation_of_histone_acetylation
GO_bp:go_morphogenesis...	160	0.111	0.0105	0.0781	0.077365	GO_bp:go_morphogenesis_of_a_branching_structure
GO_bp:go_regulation_of...	43	0.205	0.0101	0.144	0.0774	GO_bp:go_regulation_of_chondrocyte_differentiation
Curated_gene_sets:naka...	27	0.249	0.00973	0.175	0.077551	Curated_gene_sets:nakajima_eosinophil
GO_bp:go_signal_transd...	31	0.238	0.00995	0.167	0.077633	GO_bp:go_signal_transduction_in_absence_of_ligand
GO_bp:go_extrinsic_apo...	31	0.238	0.00995	0.167	0.077633	GO_bp:go_extrinsic_apoptotic_signaling_pathway_in_absence_of_ligand
GO_bp:go_aspartate_fam...	16	0.385	0.0116	0.271	0.077645	GO_bp:go_aspartate_family_amino_acid_catabolic_process
GO_cc:go_axon	389	0.0695	0.0102	0.0489	0.077674	GO_cc:go_axon
GO_bp:go_renal_tubule_...	73	0.164	0.0105	0.115	0.077753	GO_bp:go_renal_tubule_development
GO_mf:go_transcription...	10	0.433	0.0103	0.305	0.077825	GO_mf:go_transcription_coactivator_binding
GO_bp:go_regulation_of...	60	0.18	0.0105	0.127	0.077843	GO_bp:go_regulation_of_multicellular_organism_growth
Curated_gene_sets:wang...	40	0.206	0.00979	0.145	0.077859	Curated_gene_sets:wang_targets_of_mll_cbp_fusion_up
GO_bp:go_ventricular_t...	10	0.446	0.0106	0.314	0.078	GO_bp:go_ventricular_trabecula_myocardium_morphogenesis
GO_bp:go_positive_regu...	23	0.295	0.0106	0.208	0.078058	GO_bp:go_positive_regulation_of_filopodium_assembly
GO_mf:go_carboxy_lyase...	35	0.242	0.0108	0.171	0.078091	GO_mf:go_carboxy_lyase_activity
GO_bp:go_ventricular_s...	52	0.195	0.0106	0.138	0.078142	GO_bp:go_ventricular_septum_development
GO_bp:go_guanosine_con...	14	0.283	0.00796	0.2	0.078204	GO_bp:go_guanosine_containing_compound_biosynthetic_process
GO_bp:go_deoxyribonucl...	11	0.421	0.0105	0.297	0.078356	GO_bp:go_deoxyribonucleotide_biosynthetic_process
GO_bp:go_regulation_of...	12	0.368	0.00958	0.26	0.078389	GO_bp:go_regulation_of_peroxisome_proliferator_activated_receptor_signaling_pathway
Curated_gene_sets:bioc...	9	0.459	0.0103	0.324	0.078477	Curated_gene_sets:biocarta_etc_pathway
Curated_gene_sets:reac...	57	0.178	0.0101	0.126	0.078689	Curated_gene_sets:reactome_costimulation_by_the_cd28_family
Curated_gene_sets:reac...	21	0.271	0.00932	0.192	0.078693	Curated_gene_sets:reactome_downregulation_of_tgf_beta_receptor_signaling
Curated_gene_sets:ly_a...	54	0.175	0.00963	0.123	0.078748	Curated_gene_sets:ly_aging_old_dn
GO_bp:go_beta_catenin_...	43	0.206	0.0101	0.146	0.078775	GO_bp:go_beta_catenin_tcf_complex_assembly
Curated_gene_sets:pid_...	26	0.254	0.00974	0.18	0.078819	Curated_gene_sets:pid_p38_mkk3_6pathway
GO_bp:go_regulation_of...	22	0.255	0.00898	0.18	0.07889	GO_bp:go_regulation_of_t_cell_migration
Curated_gene_sets:boyl...	88	0.151	0.0106	0.107	0.078916	Curated_gene_sets:boylan_multiple_myeloma_d_up
Curated_gene_sets:eppe...	107	0.134	0.0104	0.095	0.078957	Curated_gene_sets:eppert_hsc_r
GO_bp:go_cardiac_chamb...	98	0.145	0.0107	0.103	0.079079	GO_bp:go_cardiac_chamber_morphogenesis
GO_bp:go_chromosome_or...	899	0.0448	0.00984	0.0317	0.079123	GO_bp:go_chromosome_organization
Curated_gene_sets:kan_...	105	0.135	0.0104	0.096	0.079158	Curated_gene_sets:kan_response_to_arsenic_trioxide
GO_bp:go_regulation_of...	202	0.0911	0.00968	0.0646	0.079186	GO_bp:go_regulation_of_protein_stability
Curated_gene_sets:goer...	12	0.365	0.00949	0.259	0.07927	Curated_gene_sets:goering_blood_hdl_cholesterol_qtl_trans
GO_bp:go_protein_matur...	239	0.0873	0.0101	0.0619	0.079335	GO_bp:go_protein_maturation
Curated_gene_sets:benp...	8	0.447	0.00951	0.317	0.07935	Curated_gene_sets:benporath_es_core_nine
GO_bp:go_embryonic_hin...	27	0.281	0.011	0.199	0.079396	GO_bp:go_embryonic_hindlimb_morphogenesis
Curated_gene_sets:mull...	21	0.283	0.00976	0.201	0.079511	Curated_gene_sets:mulligan_ntf3_signaling_via_insr_and_igf1r_up
GO_bp:go_endocardial_c...	31	0.256	0.0107	0.182	0.079622	GO_bp:go_endocardial_cushion_development
GO_mf:go_dioxygenase_a...	78	0.148	0.00979	0.105	0.079768	GO_mf:go_dioxygenase_activity
GO_cc:go_sin3_type_com...	15	0.348	0.0101	0.248	0.079844	GO_cc:go_sin3_type_complex
Curated_gene_sets:kegg...	106	0.125	0.00968	0.0892	0.07993	Curated_gene_sets:kegg_oocyte_meiosis
Curated_gene_sets:daza...	27	0.27	0.0105	0.192	0.080077	Curated_gene_sets:dazard_uv_response_cluster_g24
GO_bp:go_ammonium_tran...	57	0.188	0.0106	0.134	0.080079	GO_bp:go_ammonium_transport
GO_bp:go_negative_regu...	41	0.223	0.0107	0.159	0.080083	GO_bp:go_negative_regulation_of_jak_stat_cascade
GO_bp:go_negative_regu...	41	0.223	0.0107	0.159	0.080083	GO_bp:go_negative_regulation_of_stat_cascade
Curated_gene_sets:tart...	67	0.153	0.00939	0.109	0.080243	Curated_gene_sets:tarte_plasma_cell_vs_b_lymphocyte_up
GO_bp:go_protein_desta...	32	0.217	0.00922	0.155	0.080283	GO_bp:go_protein_destabilization
GO_mf:go_rna_polymeras...	49	0.177	0.00931	0.126	0.080511	GO_mf:go_rna_polymerase_ii_core_promoter_sequence_specific_dna_binding
GO_bp:go_apoptotic_cel...	27	0.271	0.0106	0.193	0.080593	GO_bp:go_apoptotic_cell_clearance
Curated_gene_sets:ferr...	15	0.371	0.0108	0.265	0.080682	Curated_gene_sets:ferrando_lyl1_neighbors
Curated_gene_sets:reac...	64	0.18	0.0108	0.129	0.080844	Curated_gene_sets:reactome_phase1_functionalization_of_compounds
GO_bp:go_cytoplasmic_m...	13	0.382	0.0103	0.273	0.080867	GO_bp:go_cytoplasmic_mrna_processing_body_assembly
Curated_gene_sets:dela...	426	0.0657	0.0101	0.047	0.08087	Curated_gene_sets:delacroix_rar_bound_es
GO_bp:go_positive_regu...	157	0.108	0.0101	0.077	0.080957	GO_bp:go_positive_regulation_of_mitochondrion_organization
GO_bp:go_positive_regu...	15	0.303	0.00883	0.217	0.080976	GO_bp:go_positive_regulation_of_sterol_transport
GO_bp:go_positive_regu...	15	0.303	0.00883	0.217	0.080976	GO_bp:go_positive_regulation_of_cholesterol_transport
Curated_gene_sets:niel...	16	0.293	0.0088	0.209	0.08107	Curated_gene_sets:nielsen_leiomyosarcoma_up
GO_mf:go_insulin_recep...	10	0.387	0.0092	0.277	0.081338	GO_mf:go_insulin_receptor_substrate_binding
GO_mf:go_map_kinase_ph...	11	0.386	0.00963	0.277	0.081367	GO_mf:go_map_kinase_phosphatase_activity
GO_bp:go_regulation_of...	25	0.268	0.0101	0.192	0.081428	GO_bp:go_regulation_of_type_2_immune_response
Curated_gene_sets:mura...	20	0.328	0.011	0.235	0.081432	Curated_gene_sets:murakami_uv_response_6hr_dn
GO_bp:go_regulation_of...	765	0.0486	0.00989	0.0348	0.081448	GO_bp:go_regulation_of_immune_response
GO_bp:go_dna_templated...	8	0.459	0.00975	0.329	0.081478	GO_bp:go_dna_templated_transcriptional_preinitiation_complex_assembly
Curated_gene_sets:daza...	223	0.0851	0.00949	0.061	0.081523	Curated_gene_sets:dazard_response_to_uv_nhek_up
GO_bp:go_muscle_atrophy	10	0.431	0.0103	0.309	0.081579	GO_bp:go_muscle_atrophy
GO_bp:go_protein_k63_l...	20	0.276	0.00929	0.198	0.081609	GO_bp:go_protein_k63_linked_deubiquitination
Curated_gene_sets:bioc...	21	0.27	0.00931	0.194	0.081816	Curated_gene_sets:biocarta_il6_pathway
Curated_gene_sets:fine...	16	0.283	0.00849	0.203	0.08182	Curated_gene_sets:finetti_breast_cancer_kinome_red
GO_bp:go_blood_vessel_...	30	0.241	0.00991	0.173	0.081827	GO_bp:go_blood_vessel_remodeling
GO_mf:go_voltage_gated...	40	0.221	0.0105	0.158	0.081854	GO_mf:go_voltage_gated_calcium_channel_activity
Curated_gene_sets:reac...	12	0.37	0.00963	0.266	0.081952	Curated_gene_sets:reactome_n_glycan_trimming_in_the_er_and_calnexin_calreticulin_cycle
Curated_gene_sets:zhan...	38	0.218	0.0101	0.157	0.082024	Curated_gene_sets:zhan_v2_late_differentiation_genes
Curated_gene_sets:reac...	27	0.283	0.011	0.203	0.08204	Curated_gene_sets:reactome_adherens_junctions_interactions
Curated_gene_sets:reac...	40	0.199	0.00945	0.143	0.082219	Curated_gene_sets:reactome_pre_notch_expression_and_processing
GO_bp:go_regulation_of...	19	0.334	0.0109	0.24	0.082229	GO_bp:go_regulation_of_cardiac_muscle_cell_differentiation
GO_bp:go_regulation_of...	32	0.244	0.0104	0.176	0.082243	GO_bp:go_regulation_of_actin_cytoskeleton_reorganization
GO_bp:go_response_to_r...	382	0.0666	0.00968	0.0479	0.082521	GO_bp:go_response_to_radiation
Curated_gene_sets:yih_...	9	0.487	0.011	0.351	0.08265	Curated_gene_sets:yih_response_to_arsenite_c5
GO_bp:go_cell_recognition	123	0.113	0.00935	0.0813	0.082995	GO_bp:go_cell_recognition
Curated_gene_sets:taka...	7	0.535	0.0106	0.386	0.083059	Curated_gene_sets:takada_gastric_cancer_copy_number_up
GO_bp:go_membrane_prot...	30	0.244	0.01	0.176	0.083181	GO_bp:go_membrane_protein_proteolysis
GO_bp:go_forebrain_neu...	28	0.26	0.0103	0.188	0.083332	GO_bp:go_forebrain_neuron_development
GO_bp:go_cell_adhesion...	12	0.396	0.0103	0.286	0.083336	GO_bp:go_cell_adhesion_mediated_by_integrin
GO_bp:go_organelle_loc...	385	0.066	0.00963	0.0477	0.08346	GO_bp:go_organelle_localization
GO_bp:go_regulation_of...	121	0.116	0.00954	0.0837	0.083502	GO_bp:go_regulation_of_reproductive_process
Curated_gene_sets:bioc...	16	0.362	0.0109	0.262	0.08355	Curated_gene_sets:biocarta_p53_pathway
GO_bp:go_negative_regu...	12	0.345	0.00898	0.25	0.083559	GO_bp:go_negative_regulation_of_androgen_receptor_signaling_pathway
Curated_gene_sets:reac...	10	0.358	0.00852	0.259	0.083614	Curated_gene_sets:reactome_abacavir_transport_and_metabolism
GO_bp:go_female_sex_di...	106	0.129	0.00999	0.0938	0.083645	GO_bp:go_female_sex_differentiation
GO_bp:go_negative_regu...	253	0.0818	0.00971	0.0592	0.083677	GO_bp:go_negative_regulation_of_response_to_external_stimulus
GO_bp:go_mammary_gland...	17	0.374	0.0116	0.271	0.083692	GO_bp:go_mammary_gland_alveolus_development
GO_bp:go_mammary_gland...	17	0.374	0.0116	0.271	0.083692	GO_bp:go_mammary_gland_lobule_development
Curated_gene_sets:uday...	212	0.0917	0.00997	0.0664	0.083744	Curated_gene_sets:udayakumar_med1_targets_dn
GO_bp:go_positive_regu...	10	0.394	0.00936	0.285	0.083796	GO_bp:go_positive_regulation_of_receptor_biosynthetic_process
Curated_gene_sets:zhen...	54	0.19	0.0105	0.138	0.083874	Curated_gene_sets:zheng_glioblastoma_plasticity_dn
Curated_gene_sets:ghan...	32	0.258	0.011	0.187	0.083878	Curated_gene_sets:ghandhi_direct_irradiation_dn
Curated_gene_sets:bae_...	28	0.241	0.00956	0.174	0.083879	Curated_gene_sets:bae_brca1_targets_dn
Curated_gene_sets:pid_...	74	0.143	0.0092	0.103	0.083915	Curated_gene_sets:pid_met_pathway
GO_bp:go_positive_regu...	16	0.28	0.0084	0.203	0.083919	GO_bp:go_positive_regulation_of_t_cell_mediated_cytotoxicity
Curated_gene_sets:schl...	123	0.12	0.00994	0.0867	0.083944	Curated_gene_sets:schlosser_serum_response_up
GO_bp:go_positive_regu...	76	0.146	0.00956	0.106	0.083944	GO_bp:go_positive_regulation_of_exocytosis
GO_bp:go_long_term_syn...	14	0.336	0.00944	0.244	0.084013	GO_bp:go_long_term_synaptic_depression
Curated_gene_sets:kond...	4	0.626	0.00941	0.454	0.084076	Curated_gene_sets:kondo_colon_cancer_hcp_with_h3k27me3
GO_bp:go_negative_regu...	9	0.369	0.00832	0.268	0.084088	GO_bp:go_negative_regulation_of_cellular_senescence
Curated_gene_sets:lee_...	73	0.151	0.0097	0.11	0.08414	Curated_gene_sets:lee_aging_neocortex_dn
Curated_gene_sets:wu_h...	20	0.296	0.00995	0.215	0.084235	Curated_gene_sets:wu_hbx_targets_2_up
Curated_gene_sets:kegg...	61	0.155	0.0091	0.113	0.084335	Curated_gene_sets:kegg_epithelial_cell_signaling_in_helicobacter_pylori_infection
GO_bp:go_monovalent_in...	115	0.117	0.00943	0.0853	0.084385	GO_bp:go_monovalent_inorganic_cation_homeostasis
GO_bp:go_regulation_of...	56	0.172	0.00966	0.125	0.084512	GO_bp:go_regulation_of_monooxygenase_activity
Curated_gene_sets:scha...	20	0.332	0.0112	0.242	0.08462	Curated_gene_sets:schaeffer_sox9_targets_in_prostate_development_up
Curated_gene_sets:daza...	19	0.324	0.0106	0.236	0.084643	Curated_gene_sets:dazard_uv_response_cluster_g28
Curated_gene_sets:matz...	69	0.151	0.00939	0.11	0.084799	Curated_gene_sets:matzuk_spermatocyte
Curated_gene_sets:kork...	8	0.435	0.00925	0.317	0.084851	Curated_gene_sets:korkola_embryonal_carcinoma
Curated_gene_sets:daza...	59	0.158	0.0091	0.115	0.084898	Curated_gene_sets:dazard_uv_response_cluster_g1
GO_mf:go_cytokine_rece...	258	0.0854	0.0102	0.0622	0.084933	GO_mf:go_cytokine_receptor_binding
GO_bp:go_glycoprotein_...	13	0.359	0.00972	0.261	0.08497	GO_bp:go_glycoprotein_catabolic_process
Curated_gene_sets:kyng...	32	0.238	0.0101	0.173	0.084985	Curated_gene_sets:kyng_environmental_stress_response_not_by_gamma_in_ws
Curated_gene_sets:shir...	9	0.387	0.00874	0.282	0.085011	Curated_gene_sets:shiraishi_plzf_targets_up
GO_bp:go_positive_regu...	11	0.444	0.0111	0.324	0.085062	GO_bp:go_positive_regulation_of_cardiac_muscle_contraction
Curated_gene_sets:stam...	16	0.35	0.0105	0.255	0.085081	Curated_gene_sets:stambolsky_bound_by_mutated_tp53
Curated_gene_sets:kim_...	55	0.181	0.0101	0.132	0.085144	Curated_gene_sets:kim_germinal_center_t_helper_up
GO_bp:go_branching_inv...	40	0.205	0.00972	0.149	0.085144	GO_bp:go_branching_involved_in_ureteric_bud_morphogenesis
Curated_gene_sets:reac...	18	0.317	0.0101	0.231	0.08515	Curated_gene_sets:reactome_inhibition_of_the_proteolytic_activity_of_apc_c_required_for_the_onset_of_anaphase_by_mitotic_spindle_checkpoint_components
Curated_gene_sets:hoeg...	26	0.251	0.00963	0.183	0.085219	Curated_gene_sets:hoegerkorp_cd44_targets_temporal_dn
Curated_gene_sets:wang...	20	0.332	0.0112	0.242	0.085297	Curated_gene_sets:wang_response_to_forskolin_up
Curated_gene_sets:hosh...	219	0.0851	0.00941	0.0621	0.08532	Curated_gene_sets:hoshida_liver_cancer_subclass_s1
GO_cc:go_escrt_iii_com...	11	0.464	0.0116	0.338	0.085336	GO_cc:go_escrt_iii_complex
Curated_gene_sets:calv...	5	0.431	0.00724	0.315	0.085516	Curated_gene_sets:calvet_irinotecan_sensitive_vs_reverted_up
Curated_gene_sets:jaza...	40	0.202	0.00959	0.147	0.085528	Curated_gene_sets:jazaeri_breast_cancer_brca1_vs_brca2_dn
Curated_gene_sets:clau...	12	0.435	0.0113	0.318	0.085577	Curated_gene_sets:claus_pgr_positive_meningioma_dn
Curated_gene_sets:saff...	84	0.133	0.00914	0.0972	0.085646	Curated_gene_sets:safford_t_lymphocyte_anergy
GO_bp:go_nucleotide_sa...	13	0.371	0.01	0.271	0.085744	GO_bp:go_nucleotide_salvage
GO_mf:go_adenosine_dea...	11	0.37	0.00923	0.271	0.085894	GO_mf:go_adenosine_deaminase_activity
GO_bp:go_regulation_of...	94	0.134	0.00977	0.0983	0.085932	GO_bp:go_regulation_of_transforming_growth_factor_beta_receptor_signaling_pathway
GO_bp:go_regulation_of...	94	0.134	0.00977	0.0983	0.085932	GO_bp:go_regulation_of_cellular_response_to_transforming_growth_factor_beta_stimulus
Curated_gene_sets:marz...	109	0.123	0.00964	0.0903	0.08624	Curated_gene_sets:marzec_il2_signaling_up
Curated_gene_sets:kegg...	118	0.116	0.00946	0.0853	0.086503	Curated_gene_sets:kegg_neurotrophin_signaling_pathway
Curated_gene_sets:cair...	20	0.29	0.00974	0.213	0.086609	Curated_gene_sets:cairo_pml_targets_bound_by_myc_up
Curated_gene_sets:wang...	24	0.233	0.00857	0.171	0.086658	Curated_gene_sets:wang_nfkb_targets
GO_cc:go_neuronal_post...	50	0.185	0.00985	0.136	0.086674	GO_cc:go_neuronal_postsynaptic_density
GO_bp:go_regulation_of...	207	0.0907	0.00976	0.0666	0.086706	GO_bp:go_regulation_of_heart_contraction
Curated_gene_sets:krig...	835	0.0448	0.00949	0.0329	0.086778	Curated_gene_sets:krige_response_to_tosedostat_6hr_up
Curated_gene_sets:ball...	14	0.323	0.00907	0.237	0.086788	Curated_gene_sets:ballif_developmental_disability_p16_p12_deletion
GO_mf:go_metalloaminop...	13	0.369	0.01	0.271	0.0868	GO_mf:go_metalloaminopeptidase_activity
GO_bp:go_regulation_of...	17	0.31	0.0096	0.228	0.086815	GO_bp:go_regulation_of_chromatin_silencing
GO_mf:go_channel_inhib...	35	0.223	0.00991	0.164	0.08684	GO_mf:go_channel_inhibitor_activity
Curated_gene_sets:tien...	79	0.142	0.0095	0.105	0.086844	Curated_gene_sets:tien_intestine_probiotics_2hr_dn
GO_bp:go_regulation_of...	330	0.0706	0.00956	0.0519	0.086914	GO_bp:go_regulation_of_sequence_specific_dna_binding_transcription_factor_activity
GO_bp:go_regulation_of...	9	0.381	0.00858	0.28	0.086922	GO_bp:go_regulation_of_skeletal_muscle_contraction
Curated_gene_sets:wors...	9	0.374	0.00842	0.275	0.08694	Curated_gene_sets:worschech_tumor_rejection_dn
GO_bp:go_regulation_of...	27	0.243	0.00948	0.179	0.087072	GO_bp:go_regulation_of_oxidative_stress_induced_intrinsic_apoptotic_signaling_pathway
GO_bp:go_histone_h3_de...	18	0.257	0.0082	0.189	0.087176	GO_bp:go_histone_h3_deacetylation
Curated_gene_sets:asti...	54	0.168	0.00925	0.124	0.087205	Curated_gene_sets:astier_integrin_signaling
GO_bp:go_positive_regu...	16	0.361	0.0108	0.266	0.087214	GO_bp:go_positive_regulation_of_vascular_endothelial_growth_factor_receptor_signaling_pathway
Curated_gene_sets:chib...	44	0.177	0.00883	0.131	0.087235	Curated_gene_sets:chiba_response_to_tsa
GO_mf:go_glucocorticoi...	14	0.35	0.00985	0.258	0.087246	GO_mf:go_glucocorticoid_receptor_binding
Curated_gene_sets:kyng...	39	0.201	0.00943	0.148	0.08731	Curated_gene_sets:kyng_environmental_stress_response_not_by_4nqo_in_ws
GO_bp:go_reverse_chole...	17	0.327	0.0101	0.241	0.087456	GO_bp:go_reverse_cholesterol_transport
GO_bp:go_cyclic_nucleo...	54	0.17	0.00937	0.125	0.087472	GO_bp:go_cyclic_nucleotide_metabolic_process
GO_bp:go_cellular_resp...	38	0.215	0.00994	0.158	0.08748	GO_bp:go_cellular_response_to_nutrient
GO_bp:go_positive_regu...	13	0.395	0.0107	0.292	0.087624	GO_bp:go_positive_regulation_of_keratinocyte_differentiation
Curated_gene_sets:reac...	74	0.16	0.0103	0.118	0.087746	Curated_gene_sets:reactome_extracellular_matrix_organization
Curated_gene_sets:boye...	9	0.434	0.00979	0.321	0.087871	Curated_gene_sets:boyerinas_oncofetal_targets_of_let7a1
Curated_gene_sets:daco...	26	0.217	0.00833	0.161	0.087883	Curated_gene_sets:dacosta_uv_response_via_ercc3_xpcs_up
Curated_gene_sets:xu_g...	126	0.118	0.00996	0.0874	0.087909	Curated_gene_sets:xu_gh1_autocrine_targets_dn
Curated_gene_sets:reac...	44	0.241	0.012	0.178	0.087954	Curated_gene_sets:reactome_defensins
GO_bp:go_peptide_hormo...	28	0.262	0.0104	0.194	0.087975	GO_bp:go_peptide_hormone_processing
GO_cc:go_esc_e_z_complex	15	0.286	0.00833	0.211	0.087984	GO_cc:go_esc_e_z_complex
GO_bp:go_peptidyl_argi...	14	0.3	0.00845	0.222	0.088066	GO_bp:go_peptidyl_arginine_methylation
Curated_gene_sets:wata...	27	0.256	0.01	0.19	0.088265	Curated_gene_sets:watanabe_colon_cancer_msi_vs_mss_up
Curated_gene_sets:khet...	44	0.191	0.00952	0.141	0.088265	Curated_gene_sets:khetchoumian_trim24_targets_up
Curated_gene_sets:zhan...	210	0.0896	0.00971	0.0663	0.088406	Curated_gene_sets:zhang_tlx_targets_36hr_up
Curated_gene_sets:font...	25	0.263	0.00988	0.195	0.088442	Curated_gene_sets:fontaine_thyroid_tumor_uncertain_malignancy_dn
GO_mf:go_bicarbonate_t...	19	0.293	0.00961	0.217	0.088482	GO_mf:go_bicarbonate_transmembrane_transporter_activity
GO_bp:go_negative_regu...	403	0.0641	0.00957	0.0475	0.088505	GO_bp:go_negative_regulation_of_cell_cycle
Curated_gene_sets:reac...	12	0.368	0.00957	0.272	0.088571	Curated_gene_sets:reactome_tetrahydrobiopterin_bh4_synthesis_recycling_salvage_and_regulation
GO_bp:go_positive_regu...	64	0.167	0.01	0.124	0.088629	GO_bp:go_positive_regulation_of_interleukin_6_production
GO_bp:go_endothelial_c...	68	0.16	0.00988	0.118	0.088877	GO_bp:go_endothelial_cell_differentiation
Curated_gene_sets:li_i...	108	0.124	0.00967	0.0921	0.088965	Curated_gene_sets:li_induced_t_to_natural_killer_dn
Curated_gene_sets:lui_...	42	0.202	0.00985	0.15	0.089009	Curated_gene_sets:lui_thyroid_cancer_pax8_pparg_up
GO_bp:go_regulation_of...	648	0.0509	0.00957	0.0378	0.089031	GO_bp:go_regulation_of_secretion
Curated_gene_sets:zhu_...	84	0.144	0.00993	0.107	0.089147	Curated_gene_sets:zhu_cmv_24_hr_dn
GO_bp:go_negative_regu...	284	0.0781	0.00981	0.058	0.08919	GO_bp:go_negative_regulation_of_proteolysis
GO_bp:go_positive_regu...	36	0.219	0.00987	0.163	0.089533	GO_bp:go_positive_regulation_of_organ_growth
Curated_gene_sets:bioc...	32	0.204	0.00868	0.152	0.089552	Curated_gene_sets:biocarta_toll_pathway
Curated_gene_sets:waka...	135	0.101	0.00876	0.075	0.0896	Curated_gene_sets:wakabayashi_adipogenesis_pparg_rxra_bound_with_h4k20me1_mark
GO_mf:go_four_way_junc...	12	0.35	0.00911	0.26	0.089604	GO_mf:go_four_way_junction_dna_binding
GO_bp:go_serotonin_met...	10	0.371	0.00881	0.276	0.089686	GO_bp:go_serotonin_metabolic_process
GO_bp:go_positive_regu...	955	0.0426	0.00962	0.0317	0.089706	GO_bp:go_positive_regulation_of_phosphate_metabolic_process
GO_bp:go_positive_regu...	955	0.0426	0.00962	0.0317	0.089706	GO_bp:go_positive_regulation_of_phosphorus_metabolic_process
GO_bp:go_protein_methy...	111	0.112	0.00881	0.0831	0.089722	GO_bp:go_protein_methylation
GO_bp:go_protein_alkyl...	111	0.112	0.00881	0.0831	0.089722	GO_bp:go_protein_alkylation
GO_bp:go_thyroid_hormo...	12	0.376	0.00978	0.28	0.089768	GO_bp:go_thyroid_hormone_generation
Curated_gene_sets:guo_...	73	0.145	0.00929	0.108	0.089801	Curated_gene_sets:guo_hex_targets_up
Curated_gene_sets:jone...	4	0.533	0.00801	0.397	0.089974	Curated_gene_sets:jones_tcof1_targets
Curated_gene_sets:pid_...	33	0.2	0.00861	0.149	0.090002	Curated_gene_sets:pid_hiv_nef_pathway
Curated_gene_sets:prov...	128	0.114	0.00969	0.0853	0.090028	Curated_gene_sets:provenzani_metastasis_dn
Curated_gene_sets:verr...	20	0.271	0.0091	0.202	0.090125	Curated_gene_sets:verrecchia_response_to_tgfb1_c5
Curated_gene_sets:nels...	80	0.142	0.00953	0.106	0.090193	Curated_gene_sets:nelson_response_to_androgen_up
GO_bp:go_regulation_of...	20	0.282	0.00947	0.211	0.090354	GO_bp:go_regulation_of_receptor_recycling
Curated_gene_sets:lau_...	5	0.526	0.00884	0.393	0.090367	Curated_gene_sets:lau_apoptosis_cdkn2a_dn
GO_bp:go_mesonephric_t...	48	0.186	0.0097	0.139	0.090385	GO_bp:go_mesonephric_tubule_morphogenesis
Curated_gene_sets:wund...	10	0.346	0.00821	0.258	0.090491	Curated_gene_sets:wunder_inflammatory_response_and_cholesterol_dn
GO_bp:go_pyrimidine_co...	35	0.2	0.0089	0.15	0.090506	GO_bp:go_pyrimidine_containing_compound_biosynthetic_process
GO_bp:go_spinal_cord_m...	33	0.254	0.011	0.19	0.090533	GO_bp:go_spinal_cord_motor_neuron_differentiation
GO_cc:go_catalytic_com...	951	0.0417	0.00941	0.0312	0.090663	GO_cc:go_catalytic_complex
Curated_gene_sets:tayl...	73	0.142	0.00907	0.106	0.090766	Curated_gene_sets:taylor_methylated_in_acute_lymphoblastic_leukemia
Curated_gene_sets:chic...	514	0.0563	0.00945	0.0421	0.090784	Curated_gene_sets:chicas_rb1_targets_senescent
GO_bp:go_regulation_of...	18	0.265	0.00844	0.198	0.090832	GO_bp:go_regulation_of_cholesterol_efflux
GO_bp:go_diacylglycero...	10	0.347	0.00825	0.26	0.090848	GO_bp:go_diacylglycerol_metabolic_process
GO_mf:go_mitogen_activ...	15	0.335	0.00975	0.251	0.090881	GO_mf:go_mitogen_activated_protein_kinase_kinase_binding
GO_cc:go_set1c_compass...	10	0.339	0.00805	0.254	0.090933	GO_cc:go_set1c_compass_complex
GO_cc:go_presynapse	264	0.0779	0.00944	0.0583	0.09094	GO_cc:go_presynapse
Curated_gene_sets:zemb...	18	0.316	0.0101	0.237	0.091036	Curated_gene_sets:zembutsu_sensitivity_to_cisplatin
GO_bp:go_response_to_m...	31	0.226	0.00943	0.169	0.091105	GO_bp:go_response_to_mineralocorticoid
Curated_gene_sets:park...	12	0.333	0.00868	0.25	0.09112	Curated_gene_sets:park_osteoblast_differentiation_by_phenylamil_up
GO_bp:go_sensory_organ...	461	0.0621	0.00989	0.0466	0.091344	GO_bp:go_sensory_organ_development
GO_bp:go_positive_regu...	12	0.31	0.00806	0.232	0.091393	GO_bp:go_positive_regulation_of_cholesterol_efflux
GO_mf:go_ww_domain_bin...	20	0.27	0.00908	0.203	0.091509	GO_mf:go_ww_domain_binding
GO_bp:go_positive_regu...	30	0.228	0.00937	0.171	0.09152	GO_bp:go_positive_regulation_of_embryonic_development
Curated_gene_sets:croo...	91	0.125	0.00891	0.0936	0.091582	Curated_gene_sets:croonquist_nras_vs_stromal_stimulation_dn
Curated_gene_sets:kaab...	37	0.206	0.00942	0.155	0.091622	Curated_gene_sets:kaab_failed_heart_atrium_up
GO_cc:go_pigment_granule	97	0.133	0.00982	0.0999	0.09165	GO_cc:go_pigment_granule
GO_mf:go_phospholipase...	16	0.322	0.00969	0.242	0.091704	GO_mf:go_phospholipase_binding
GO_bp:go_regulation_of...	48	0.174	0.00906	0.131	0.091749	GO_bp:go_regulation_of_dendritic_spine_development
Curated_gene_sets:farm...	7	0.518	0.0103	0.39	0.091832	Curated_gene_sets:farmer_breast_cancer_cluster_8
GO_bp:go_negative_regu...	27	0.235	0.00916	0.177	0.09198	GO_bp:go_negative_regulation_of_toll_like_receptor_signaling_pathway
GO_bp:go_positive_regu...	12	0.34	0.00885	0.256	0.092077	GO_bp:go_positive_regulation_of_cellular_extravasation
Curated_gene_sets:kegg...	85	0.14	0.0097	0.106	0.092078	Curated_gene_sets:kegg_prostate_cancer
Curated_gene_sets:lope...	17	0.268	0.00831	0.202	0.092092	Curated_gene_sets:lopez_epithelioid_mesothelioma
Curated_gene_sets:pede...	17	0.31	0.00959	0.233	0.092311	Curated_gene_sets:pedersen_metastasis_by_erbb2_isoform_3
GO_bp:go_execution_pha...	48	0.181	0.0094	0.136	0.092354	GO_bp:go_execution_phase_of_apoptosis
GO_bp:go_regulation_of...	1276	0.0366	0.00947	0.0276	0.092416	GO_bp:go_regulation_of_immune_system_process
Curated_gene_sets:wang...	21	0.289	0.00994	0.218	0.092468	Curated_gene_sets:wang_metastasis_of_breast_cancer_esr1_up
Curated_gene_sets:gent...	41	0.207	0.00995	0.156	0.092471	Curated_gene_sets:gentile_uv_response_cluster_d2
GO_cc:go_cell_surface	680	0.0484	0.00931	0.0366	0.09263	GO_cc:go_cell_surface
Curated_gene_sets:reac...	31	0.185	0.00776	0.14	0.09264	Curated_gene_sets:reactome_mrna_3_end_processing
Curated_gene_sets:numa...	20	0.25	0.0084	0.189	0.092739	Curated_gene_sets:numata_csf3_signaling_via_stat3
GO_mf:go_lipoprotein_p...	21	0.284	0.00979	0.215	0.092809	GO_mf:go_lipoprotein_particle_receptor_binding
Curated_gene_sets:dang...	225	0.0819	0.00917	0.0619	0.092966	Curated_gene_sets:dang_regulated_by_myc_dn
GO_bp:go_hair_cell_dif...	33	0.222	0.0096	0.168	0.092998	GO_bp:go_hair_cell_differentiation
GO_bp:go_response_to_e...	15	0.303	0.00881	0.229	0.093085	GO_bp:go_response_to_epinephrine
GO_bp:go_regulation_of...	32	0.229	0.00973	0.173	0.093238	GO_bp:go_regulation_of_mesenchymal_cell_proliferation
Curated_gene_sets:reac...	24	0.252	0.00927	0.191	0.093279	Curated_gene_sets:reactome_post_translational_modification_synthesis_of_gpi_anchored_proteins
GO_bp:go_negative_regu...	10	0.373	0.00887	0.283	0.093281	GO_bp:go_negative_regulation_of_glycoprotein_biosynthetic_process
GO_mf:go_nucleosomal_d...	28	0.21	0.00835	0.159	0.093488	GO_mf:go_nucleosomal_dna_binding
Curated_gene_sets:he_p...	6	0.526	0.00968	0.399	0.093606	Curated_gene_sets:he_pten_targets_dn
Curated_gene_sets:sili...	17	0.32	0.00992	0.243	0.093611	Curated_gene_sets:siligan_targets_of_ews_fli1_fusion_dn
Curated_gene_sets:saba...	244	0.0811	0.00946	0.0615	0.093647	Curated_gene_sets:sabates_colorectal_adenoma_dn
GO_bp:go_columnar_cubo...	104	0.128	0.00978	0.097	0.09369	GO_bp:go_columnar_cuboidal_epithelial_cell_differentiation
GO_bp:go_regulation_of...	58	0.16	0.00913	0.121	0.093755	GO_bp:go_regulation_of_response_to_oxidative_stress
Curated_gene_sets:rama...	55	0.158	0.00878	0.12	0.093785	Curated_gene_sets:ramaswamy_metastasis_dn
GO_bp:go_regulation_of...	37	0.208	0.00949	0.158	0.093843	GO_bp:go_regulation_of_mast_cell_activation
Curated_gene_sets:ruan...	24	0.258	0.00948	0.196	0.093872	Curated_gene_sets:ruan_response_to_troglitazone_up
Curated_gene_sets:brui...	1069	0.0391	0.00932	0.0297	0.093872	Curated_gene_sets:bruins_uvc_response_late
Curated_gene_sets:pid_...	32	0.205	0.00872	0.156	0.093908	Curated_gene_sets:pid_il2_pi3k_pathway
Curated_gene_sets:pid_...	17	0.283	0.00877	0.215	0.094014	Curated_gene_sets:pid_arf_3pathway
Curated_gene_sets:reac...	48	0.199	0.0103	0.151	0.094022	Curated_gene_sets:reactome_cytochrome_p450_arranged_by_substrate_type
GO_bp:go_response_to_c...	23	0.247	0.00889	0.188	0.094116	GO_bp:go_response_to_corticosterone
Curated_gene_sets:naba...	35	0.232	0.0103	0.176	0.094195	Curated_gene_sets:naba_basement_membranes
GO_mf:go_protein_n_ter...	97	0.124	0.00912	0.0939	0.09421	GO_mf:go_protein_n_terminus_binding
Curated_gene_sets:bioc...	14	0.339	0.00954	0.258	0.094248	Curated_gene_sets:biocarta_longevity_pathway
Curated_gene_sets:bald...	32	0.211	0.00897	0.161	0.094422	Curated_gene_sets:baldwin_prkci_targets_up
GO_bp:go_positive_regu...	39	0.194	0.00908	0.147	0.09468	GO_bp:go_positive_regulation_of_atpase_activity
GO_bp:go_tissue_regene...	50	0.177	0.00937	0.135	0.09481	GO_bp:go_tissue_regeneration
GO_bp:go_negative_chem...	38	0.205	0.00951	0.157	0.094817	GO_bp:go_negative_chemotaxis
Curated_gene_sets:zhan...	48	0.179	0.00934	0.137	0.094834	Curated_gene_sets:zhan_multiple_myeloma_cd1_and_cd2_dn
Curated_gene_sets:reac...	11	0.403	0.01	0.307	0.094886	Curated_gene_sets:reactome_caspase_mediated_cleavage_of_cytoskeletal_proteins
Curated_gene_sets:kegg...	35	0.202	0.00898	0.154	0.094916	Curated_gene_sets:kegg_tryptophan_metabolism
GO_bp:go_regulation_of...	72	0.14	0.00891	0.107	0.095091	GO_bp:go_regulation_of_cellular_ph
GO_bp:go_immune_system...	1801	0.0312	0.00942	0.0238	0.095105	GO_bp:go_immune_system_process
Curated_gene_sets:thil...	7	0.559	0.0111	0.427	0.095152	Curated_gene_sets:thillainadesan_znf217_targets_dn
GO_bp:go_pattern_speci...	392	0.0665	0.00979	0.0508	0.095181	GO_bp:go_pattern_specification_process
Curated_gene_sets:gavi...	92	0.119	0.00858	0.0911	0.095231	Curated_gene_sets:gavin_foxp3_targets_cluster_t7
GO_bp:go_embryonic_cra...	45	0.19	0.00957	0.145	0.095391	GO_bp:go_embryonic_cranial_skeleton_morphogenesis
GO_bp:go_auditory_rece...	26	0.246	0.00941	0.188	0.095415	GO_bp:go_auditory_receptor_cell_differentiation
Curated_gene_sets:petr...	6	0.667	0.0123	0.51	0.095504	Curated_gene_sets:petretto_left_ventricle_mass_qtl_cis_up
Curated_gene_sets:sans...	346	0.0641	0.00888	0.049	0.095506	Curated_gene_sets:sansom_apc_targets_dn
Curated_gene_sets:reac...	16	0.264	0.00795	0.202	0.0956	Curated_gene_sets:reactome_g1_s_specific_transcription
Curated_gene_sets:fael...	40	0.197	0.00938	0.151	0.095629	Curated_gene_sets:faelt_b_cll_with_vh3_21_up
GO_bp:go_regulation_of...	67	0.157	0.00966	0.12	0.095635	GO_bp:go_regulation_of_epithelial_to_mesenchymal_transition
Curated_gene_sets:lau_...	54	0.161	0.0089	0.124	0.095719	Curated_gene_sets:lau_apoptosis_cdkn2a_up
Curated_gene_sets:st_i...	22	0.239	0.00843	0.183	0.095768	Curated_gene_sets:st_interleukin_4_pathway
Curated_gene_sets:bioc...	9	0.445	0.01	0.341	0.095812	Curated_gene_sets:biocarta_barrestin_pathway
GO_bp:go_pyrimidine_ri...	15	0.32	0.0093	0.245	0.095837	GO_bp:go_pyrimidine_ribonucleoside_triphosphate_metabolic_process
GO_mf:go_tbp_class_pro...	18	0.301	0.00958	0.23	0.095936	GO_mf:go_tbp_class_protein_binding
GO_bp:go_regulation_of...	506	0.0551	0.00919	0.0423	0.096078	GO_bp:go_regulation_of_neuron_differentiation
Curated_gene_sets:mari...	17	0.267	0.00826	0.204	0.096097	Curated_gene_sets:mariadason_response_to_curcumin_sulindac_7
GO_bp:go_vacuolar_tran...	235	0.0812	0.0093	0.0623	0.096315	GO_bp:go_vacuolar_transport
GO_bp:go_regulation_of...	82	0.136	0.00925	0.104	0.096331	GO_bp:go_regulation_of_oxidoreductase_activity
Curated_gene_sets:ly_a...	28	0.195	0.00774	0.15	0.09659	Curated_gene_sets:ly_aging_premature_dn
Curated_gene_sets:bioc...	12	0.346	0.009	0.266	0.096669	Curated_gene_sets:biocarta_fibrinolysis_pathway
Curated_gene_sets:bred...	46	0.19	0.00969	0.146	0.096674	Curated_gene_sets:bredemeyer_rag_signaling_via_atm_not_via_nfkb_up
GO_bp:go_muscle_organ_...	69	0.162	0.0101	0.125	0.096735	GO_bp:go_muscle_organ_morphogenesis
GO_bp:go_phospholipid_...	54	0.17	0.00938	0.131	0.096837	GO_bp:go_phospholipid_transport
GO_bp:go_dendritic_spi...	15	0.302	0.00878	0.232	0.096966	GO_bp:go_dendritic_spine_organization
GO_cc:go_transport_ves...	313	0.0699	0.00922	0.0538	0.096976	GO_cc:go_transport_vesicle
GO_bp:go_regulation_of...	20	0.26	0.00874	0.2	0.097104	GO_bp:go_regulation_of_cardiac_muscle_contraction_by_calcium_ion_signaling
GO_bp:go_regulation_of...	57	0.168	0.00955	0.13	0.097234	GO_bp:go_regulation_of_potassium_ion_transmembrane_transport
Curated_gene_sets:ferr...	156	0.0947	0.00886	0.073	0.097266	Curated_gene_sets:ferreira_ewings_sarcoma_unstable_vs_stable_up
GO_bp:go_negative_regu...	12	0.376	0.00979	0.29	0.097341	GO_bp:go_negative_regulation_of_cholesterol_transport
GO_bp:go_negative_regu...	12	0.376	0.00979	0.29	0.097341	GO_bp:go_negative_regulation_of_sterol_transport
GO_bp:go_positive_regu...	14	0.309	0.00868	0.238	0.097386	GO_bp:go_positive_regulation_of_macrophage_derived_foam_cell_differentiation
GO_bp:go_negative_regu...	85	0.141	0.00973	0.109	0.097406	GO_bp:go_negative_regulation_of_chromosome_organization
GO_cc:go_mhc_protein_c...	24	0.261	0.00962	0.202	0.097492	GO_cc:go_mhc_protein_complex
GO_bp:go_regulation_of...	22	0.259	0.00913	0.2	0.097625	GO_bp:go_regulation_of_transforming_growth_factor_beta_production
GO_bp:go_positive_regu...	45	0.166	0.00839	0.129	0.09774	GO_bp:go_positive_regulation_of_actin_filament_bundle_assembly
GO_bp:go_peptidyl_prol...	50	0.176	0.00935	0.136	0.097775	GO_bp:go_peptidyl_proline_modification
GO_bp:go_negative_regu...	562	0.0532	0.00933	0.0411	0.097885	GO_bp:go_negative_regulation_of_cell_differentiation
Curated_gene_sets:pid_...	55	0.163	0.00909	0.126	0.097911	Curated_gene_sets:pid_notch_pathway
GO_bp:go_regulation_of...	358	0.0651	0.00917	0.0503	0.097999	GO_bp:go_regulation_of_cell_growth
Curated_gene_sets:burt...	183	0.0858	0.00868	0.0664	0.098282	Curated_gene_sets:burton_adipogenesis_6
Curated_gene_sets:den_...	23	0.265	0.00954	0.205	0.09831	Curated_gene_sets:den_interact_with_lca5
Curated_gene_sets:lope...	13	0.359	0.00973	0.278	0.098396	Curated_gene_sets:lopez_mesothelioma_survival_overall_dn
Curated_gene_sets:gery...	115	0.118	0.00952	0.0918	0.098564	Curated_gene_sets:gery_cebp_targets
Curated_gene_sets:ji_c...	14	0.331	0.0093	0.256	0.098567	Curated_gene_sets:ji_carcinogenesis_by_kras_and_stk11_dn
GO_mf:go_nucleosome_bi...	40	0.173	0.00821	0.134	0.098583	GO_mf:go_nucleosome_binding
GO_bp:go_neuron_differ...	812	0.045	0.00942	0.0349	0.098688	GO_bp:go_neuron_differentiation
Curated_gene_sets:calv...	5	0.442	0.00743	0.343	0.098929	Curated_gene_sets:calvet_irinotecan_sensitive_vs_reverted_dn
GO_bp:go_response_to_m...	32	0.216	0.00918	0.168	0.098976	GO_bp:go_response_to_monoamine
GO_bp:go_negative_regu...	32	0.214	0.00911	0.167	0.099037	GO_bp:go_negative_regulation_of_histone_modification
Curated_gene_sets:lian...	24	0.228	0.00837	0.177	0.099074	Curated_gene_sets:lian_neutrophil_granule_constituents
GO_bp:go_cell_cycle_ar...	143	0.102	0.0091	0.079	0.09914	GO_bp:go_cell_cycle_arrest
GO_bp:go_positive_regu...	20	0.261	0.00879	0.203	0.099206	GO_bp:go_positive_regulation_of_lamellipodium_organization
GO_bp:go_retinoic_acid...	16	0.338	0.0102	0.263	0.099394	GO_bp:go_retinoic_acid_metabolic_process
GO_bp:go_collecting_du...	12	0.381	0.00991	0.296	0.099509	GO_bp:go_collecting_duct_development
GO_bp:go_negative_regu...	113	0.112	0.00891	0.0871	0.099558	GO_bp:go_negative_regulation_of_immune_response
Curated_gene_sets:mark...	14	0.359	0.0101	0.28	0.099829	Curated_gene_sets:marks_acetylated_non_histone_proteins
Curated_gene_sets:niel...	20	0.331	0.0111	0.258	0.099933	Curated_gene_sets:nielsen_liposarcoma_dn
GO_bp:go_glycoside_met...	13	0.325	0.00882	0.254	0.10001	GO_bp:go_glycoside_metabolic_process
GO_bp:go_response_to_p...	13	0.375	0.0101	0.292	0.1001	GO_bp:go_response_to_potassium_ion
GO_bp:go_negative_regu...	22	0.276	0.00974	0.216	0.10017	GO_bp:go_negative_regulation_of_myoblast_differentiation
GO_mf:go_cyclin_depend...	11	0.4	0.00996	0.312	0.10022	GO_mf:go_cyclin_dependent_protein_serine_threonine_kinase_inhibitor_activity
GO_bp:go_regulation_of...	27	0.219	0.00855	0.171	0.10025	GO_bp:go_regulation_of_fibroblast_migration
Curated_gene_sets:mark...	20	0.282	0.00948	0.22	0.1003	Curated_gene_sets:marks_hdac_targets_up
GO_bp:go_cdp_diacylgly...	14	0.296	0.00832	0.231	0.10031	GO_bp:go_cdp_diacylglycerol_metabolic_process
GO_mf:go_o_methyltrans...	17	0.284	0.00879	0.222	0.10038	GO_mf:go_o_methyltransferase_activity
Curated_gene_sets:yao_...	76	0.132	0.00865	0.103	0.10043	Curated_gene_sets:yao_hoxa10_targets_via_progesterone_up
Curated_gene_sets:pere...	181	0.0899	0.00905	0.0703	0.10047	Curated_gene_sets:perez_tp53_and_tp63_targets
GO_bp:go_pteridine_con...	16	0.262	0.00787	0.205	0.10048	GO_bp:go_pteridine_containing_compound_biosynthetic_process
Curated_gene_sets:fort...	245	0.0793	0.00926	0.062	0.10049	Curated_gene_sets:fortschegger_phf8_targets_up
GO_bp:go_cytokinetic_p...	14	0.27	0.00759	0.211	0.10049	GO_bp:go_cytokinetic_process
Curated_gene_sets:barr...	29	0.234	0.00947	0.183	0.10053	Curated_gene_sets:barrier_cancer_relapse_normal_sample_up
Curated_gene_sets:tian...	21	0.245	0.00845	0.192	0.10057	Curated_gene_sets:tian_tnf_signaling_not_via_nfkb
Curated_gene_sets:bioc...	17	0.251	0.00778	0.196	0.10069	Curated_gene_sets:biocarta_mta3_pathway
Curated_gene_sets:eina...	25	0.216	0.00813	0.169	0.10077	Curated_gene_sets:einav_interferon_signature_in_cancer
GO_bp:go_chromatin_rem...	133	0.105	0.00908	0.0823	0.10079	GO_bp:go_chromatin_remodeling
GO_bp:go_negative_regu...	10	0.368	0.00874	0.288	0.1008	GO_bp:go_negative_regulation_of_type_2_immune_response
Curated_gene_sets:gerh...	45	0.167	0.0084	0.131	0.10086	Curated_gene_sets:gerhold_adipogenesis_up
GO_cc:go_golgi_cisterna	84	0.133	0.00912	0.104	0.10087	GO_cc:go_golgi_cisterna
GO_bp:go_low_density_l...	10	0.354	0.00842	0.277	0.10089	GO_bp:go_low_density_lipoprotein_particle_clearance
Curated_gene_sets:card...	73	0.155	0.00997	0.122	0.10124	Curated_gene_sets:card_mir302a_targets
Curated_gene_sets:yosh...	1210	0.0355	0.00896	0.0279	0.10131	Curated_gene_sets:yoshimura_mapk8_targets_up
GO_bp:go_cardiac_muscl...	10	0.414	0.00984	0.325	0.10133	GO_bp:go_cardiac_muscle_adaptation
GO_bp:go_muscle_hypert...	10	0.414	0.00984	0.325	0.10133	GO_bp:go_muscle_hypertrophy_in_response_to_stress
GO_bp:go_cardiac_muscl...	10	0.414	0.00984	0.325	0.10133	GO_bp:go_cardiac_muscle_hypertrophy_in_response_to_stress
GO_bp:go_regulation_of...	389	0.0618	0.00907	0.0486	0.10171	GO_bp:go_regulation_of_response_to_wounding
GO_bp:go_regulation_of...	17	0.295	0.00915	0.232	0.1018	GO_bp:go_regulation_of_collateral_sprouting
Curated_gene_sets:byst...	10	0.34	0.00809	0.268	0.1019	Curated_gene_sets:bystrykh_hematopoiesis_stem_cell_fli1
GO_bp:go_regulation_of...	72	0.142	0.00901	0.111	0.10193	GO_bp:go_regulation_of_calcium_mediated_signaling
GO_bp:go_mitotic_spind...	64	0.132	0.00795	0.104	0.10207	GO_bp:go_mitotic_spindle_organization
GO_bp:go_alpha_beta_t_...	42	0.195	0.00947	0.153	0.10209	GO_bp:go_alpha_beta_t_cell_differentiation
GO_bp:go_response_to_m...	20	0.263	0.00885	0.208	0.10217	GO_bp:go_response_to_muscle_activity
GO_bp:go_tube_formation	124	0.107	0.00894	0.0844	0.1022	GO_bp:go_tube_formation
Curated_gene_sets:kegg...	29	0.212	0.00856	0.167	0.10226	Curated_gene_sets:kegg_citrate_cycle_tca_cycle
GO_bp:go_regulation_of...	372	0.0628	0.00901	0.0495	0.10241	GO_bp:go_regulation_of_neuron_projection_development
Curated_gene_sets:piep...	12	0.353	0.00919	0.278	0.10244	Curated_gene_sets:piepoli_lgi1_targets_up
GO_bp:go_protein_compl...	1403	0.0327	0.00885	0.0258	0.10248	GO_bp:go_protein_complex_subunit_organization
GO_mf:go_modified_amin...	14	0.282	0.00793	0.223	0.10258	GO_mf:go_modified_amino_acid_transmembrane_transporter_activity
GO_bp:go_regulation_of...	120	0.106	0.00872	0.0838	0.10261	GO_bp:go_regulation_of_ligase_activity
GO_bp:go_positive_regu...	15	0.298	0.00868	0.235	0.10265	GO_bp:go_positive_regulation_of_membrane_protein_ectodomain_proteolysis
Curated_gene_sets:schu...	316	0.0727	0.00963	0.0574	0.10267	Curated_gene_sets:schuetz_breast_cancer_ductal_invasive_up
GO_bp:go_cytokine_medi...	418	0.0621	0.00944	0.0491	0.10271	GO_bp:go_cytokine_mediated_signaling_pathway
GO_bp:go_olfactory_lob...	35	0.204	0.00908	0.161	0.10275	GO_bp:go_olfactory_lobe_development
Curated_gene_sets:tuom...	15	0.304	0.00885	0.24	0.10281	Curated_gene_sets:tuomisto_tumor_suppression_by_col13a1_up
Curated_gene_sets:pid_...	53	0.163	0.00889	0.129	0.10285	Curated_gene_sets:pid_tgfbr_pathway
Curated_gene_sets:oxfo...	9	0.407	0.00919	0.322	0.10289	Curated_gene_sets:oxford_rala_targets_up
GO_bp:go_cardiac_left_...	11	0.372	0.00928	0.294	0.10294	GO_bp:go_cardiac_left_ventricle_morphogenesis
Curated_gene_sets:bioc...	23	0.244	0.00879	0.193	0.10297	Curated_gene_sets:biocarta_pgc1a_pathway
Curated_gene_sets:zhen...	18	0.323	0.0103	0.255	0.10316	Curated_gene_sets:zheng_response_to_arsenite_up
GO_bp:go_lymph_vessel_...	12	0.324	0.00843	0.256	0.10321	GO_bp:go_lymph_vessel_morphogenesis
Curated_gene_sets:garg...	24	0.24	0.00882	0.19	0.10327	Curated_gene_sets:gargalovic_response_to_oxidized_phospholipids_red_dn
GO_bp:go_maintenance_o...	14	0.3	0.00842	0.237	0.10327	GO_bp:go_maintenance_of_protein_location_in_nucleus
GO_bp:go_neuronal_ion_...	12	0.378	0.00985	0.3	0.10333	GO_bp:go_neuronal_ion_channel_clustering
Curated_gene_sets:serv...	142	0.0985	0.00879	0.078	0.10338	Curated_gene_sets:servitja_liver_hnf1a_targets_dn
GO_bp:go_multivesicula...	31	0.214	0.00895	0.17	0.10345	GO_bp:go_multivesicular_body_organization
GO_bp:go_left_right_ax...	13	0.294	0.00797	0.233	0.10362	GO_bp:go_left_right_axis_specification
GO_bp:go_regulation_of...	144	0.0982	0.00883	0.0779	0.10363	GO_bp:go_regulation_of_muscle_cell_differentiation
Curated_gene_sets:wein...	38	0.206	0.00952	0.163	0.10365	Curated_gene_sets:weinmann_adaptation_to_hypoxia_dn
GO_bp:go_response_to_w...	11	0.349	0.00869	0.277	0.10373	GO_bp:go_response_to_water_deprivation
GO_bp:go_head_development	651	0.0477	0.00899	0.0379	0.10374	GO_bp:go_head_development
GO_cc:go_intrinsic_com...	259	0.0753	0.00904	0.0597	0.1038	GO_cc:go_intrinsic_component_of_organelle_membrane
GO_bp:go_regulation_of...	25	0.211	0.00793	0.167	0.10383	GO_bp:go_regulation_of_actin_nucleation
GO_mf:go_3_5_cyclic_am...	15	0.296	0.00862	0.235	0.1039	GO_mf:go_3_5_cyclic_amp_phosphodiesterase_activity
GO_bp:go_regulation_of...	467	0.054	0.00866	0.0429	0.10394	GO_bp:go_regulation_of_cytoskeleton_organization
GO_bp:go_female_genita...	14	0.336	0.00944	0.267	0.10403	GO_bp:go_female_genitalia_development
GO_bp:go_negative_regu...	73	0.131	0.00843	0.104	0.10418	GO_bp:go_negative_regulation_of_vasculature_development
GO_bp:go_regulation_of...	41	0.19	0.00912	0.151	0.10421	GO_bp:go_regulation_of_oxidative_stress_induced_cell_death
GO_bp:go_regeneration	150	0.0954	0.00874	0.0758	0.10433	GO_bp:go_regeneration
GO_bp:go_dna_methylati...	18	0.272	0.00866	0.216	0.1044	GO_bp:go_dna_methylation_involved_in_gamete_generation
GO_bp:go_fertilization	138	0.0978	0.00861	0.0778	0.10443	GO_bp:go_fertilization
GO_bp:go_positive_regu...	13	0.307	0.00832	0.244	0.10449	GO_bp:go_positive_regulation_of_steroid_biosynthetic_process
Curated_gene_sets:reac...	10	0.367	0.00872	0.292	0.10451	Curated_gene_sets:reactome_facilitative_na_independent_glucose_transporters
Curated_gene_sets:reac...	25	0.223	0.00838	0.178	0.10453	Curated_gene_sets:reactome_pkb_mediated_events
Curated_gene_sets:lind...	298	0.0677	0.00871	0.0539	0.10458	Curated_gene_sets:lindgren_bladder_cancer_cluster_3_up
GO_cc:go_nuclear_nucle...	34	0.261	0.0114	0.208	0.10473	GO_cc:go_nuclear_nucleosome
GO_bp:go_indolalkylami...	14	0.317	0.0089	0.252	0.10476	GO_bp:go_indolalkylamine_metabolic_process
Curated_gene_sets:wang...	20	0.264	0.00889	0.211	0.10501	Curated_gene_sets:wang_lsd1_targets_up
Curated_gene_sets:verh...	199	0.0824	0.00869	0.0659	0.10541	Curated_gene_sets:verhaak_glioblastoma_mesenchymal
GO_bp:go_negative_regu...	349	0.0649	0.00903	0.0519	0.10547	GO_bp:go_negative_regulation_of_immune_system_process
GO_mf:go_peptidoglycan...	11	0.343	0.00856	0.274	0.1055	GO_mf:go_peptidoglycan_binding
GO_cc:go_endosomal_part	390	0.0601	0.00883	0.0481	0.10554	GO_cc:go_endosomal_part
GO_bp:go_regulation_of...	91	0.121	0.00867	0.0969	0.1056	GO_bp:go_regulation_of_protein_targeting_to_mitochondrion
Curated_gene_sets:reac...	16	0.286	0.00859	0.229	0.10568	Curated_gene_sets:reactome_signaling_by_constitutively_active_egfr
Curated_gene_sets:pilo...	1844	0.0286	0.00875	0.0229	0.10571	Curated_gene_sets:pilon_klf1_targets_dn
Curated_gene_sets:der_...	5	0.559	0.00939	0.447	0.10573	Curated_gene_sets:der_ifn_alpha_response_dn
GO_bp:go_multicellular...	116	0.115	0.00925	0.0918	0.1058	GO_bp:go_multicellular_organismal_signaling
Curated_gene_sets:wang...	24	0.254	0.00935	0.203	0.10582	Curated_gene_sets:wang_barretts_esophagus_and_esophagus_cancer_up
GO_bp:go_folic_acid_co...	27	0.2	0.00782	0.16	0.10585	GO_bp:go_folic_acid_containing_compound_metabolic_process
Curated_gene_sets:matz...	27	0.24	0.00937	0.192	0.10589	Curated_gene_sets:matzuk_central_for_female_fertility
GO_bp:go_regulation_of...	58	0.149	0.0085	0.119	0.10614	GO_bp:go_regulation_of_interleukin_8_production
GO_bp:go_regulation_of...	575	0.0488	0.00866	0.0392	0.10615	GO_bp:go_regulation_of_intracellular_transport
GO_cc:go_microvillus	72	0.141	0.00897	0.113	0.1062	GO_cc:go_microvillus
Curated_gene_sets:niko...	76	0.226	0.0148	0.182	0.10621	Curated_gene_sets:nikolsky_breast_cancer_7q21_q22_amplicon
Curated_gene_sets:hosh...	57	0.151	0.00853	0.121	0.10633	Curated_gene_sets:hoshida_liver_cancer_late_recurrence_up
GO_bp:go_temperature_h...	25	0.243	0.00913	0.195	0.10633	GO_bp:go_temperature_homeostasis
Curated_gene_sets:tsen...	26	0.253	0.00969	0.203	0.1064	Curated_gene_sets:tseng_adipogenic_potential_up
Curated_gene_sets:reac...	26	0.237	0.00909	0.19	0.10641	Curated_gene_sets:reactome_amine_compound_slc_transporters
Curated_gene_sets:yang...	19	0.269	0.0088	0.216	0.10642	Curated_gene_sets:yang_muc2_targets_duodenum_6mo_dn
GO_mf:go_nucleic_acid_...	1103	0.0382	0.00924	0.0307	0.10646	GO_mf:go_nucleic_acid_binding_transcription_factor_activity
Curated_gene_sets:webe...	14	0.362	0.0102	0.29	0.10651	Curated_gene_sets:weber_methylated_icp_in_sperm_dn
GO_bp:go_peripheral_ne...	12	0.332	0.00863	0.266	0.10661	GO_bp:go_peripheral_nervous_system_neuron_differentiation
GO_bp:go_peripheral_ne...	12	0.332	0.00863	0.266	0.10661	GO_bp:go_peripheral_nervous_system_neuron_development
Curated_gene_sets:smir...	5	0.423	0.0071	0.34	0.10666	Curated_gene_sets:smirnov_circulating_endotheliocytes_in_cancer_dn
GO_bp:go_very_long_cha...	28	0.204	0.00812	0.164	0.10667	GO_bp:go_very_long_chain_fatty_acid_metabolic_process
Curated_gene_sets:monn...	339	0.0642	0.0088	0.0516	0.10668	Curated_gene_sets:monnier_postradiation_tumor_escape_dn
Curated_gene_sets:broc...	136	0.102	0.00893	0.0822	0.1068	Curated_gene_sets:brocke_apoptosis_reversed_by_il6
Curated_gene_sets:chia...	160	0.0969	0.00917	0.078	0.107	Curated_gene_sets:chiang_liver_cancer_subclass_ctnnb1_up
GO_bp:go_response_to_l...	14	0.374	0.0105	0.301	0.10703	GO_bp:go_response_to_laminar_fluid_shear_stress
GO_mf:go_beta_catenin_...	74	0.142	0.00918	0.115	0.10719	GO_mf:go_beta_catenin_binding
GO_mf:go_regulatory_re...	760	0.0444	0.009	0.0358	0.10724	GO_mf:go_regulatory_region_nucleic_acid_binding
GO_cc:go_pml_body	86	0.12	0.00833	0.0965	0.10733	GO_cc:go_pml_body
GO_bp:go_labyrinthine_...	38	0.193	0.00893	0.156	0.10739	GO_bp:go_labyrinthine_layer_development
GO_bp:go_vesicle_media...	1126	0.036	0.00879	0.029	0.10742	GO_bp:go_vesicle_mediated_transport
GO_cc:go_nuclear_chrom...	126	0.103	0.00869	0.0833	0.10744	GO_cc:go_nuclear_chromosome_telomeric_region
GO_cc:go_t_tubule	45	0.175	0.00883	0.141	0.10768	GO_cc:go_t_tubule
GO_mf:go_potassium_cha...	40	0.182	0.00864	0.147	0.1077	GO_mf:go_potassium_channel_regulator_activity
Curated_gene_sets:simb...	9	0.413	0.00931	0.333	0.10779	Curated_gene_sets:simbulan_uv_response_normal_up
GO_mf:go_insulin_like_...	23	0.245	0.00884	0.198	0.10784	GO_mf:go_insulin_like_growth_factor_binding
Curated_gene_sets:reac...	12	0.415	0.0108	0.335	0.10791	Curated_gene_sets:reactome_resolution_of_ap_sites_via_the_single_nucleotide_replacement_pathway
GO_bp:go_regulation_of...	201	0.083	0.0088	0.0671	0.10795	GO_bp:go_regulation_of_mitochondrion_organization
GO_bp:go_dicarboxylic_...	12	0.292	0.0076	0.236	0.10796	GO_bp:go_dicarboxylic_acid_biosynthetic_process
GO_mf:go_transcription...	531	0.0496	0.00847	0.0401	0.10809	GO_mf:go_transcription_factor_activity_protein_binding
GO_mf:go_ammonium_tran...	28	0.238	0.00948	0.193	0.10825	GO_mf:go_ammonium_transmembrane_transporter_activity
Curated_gene_sets:bioc...	32	0.213	0.00903	0.172	0.10833	Curated_gene_sets:biocarta_at1r_pathway
Curated_gene_sets:byst...	821	0.0412	0.00866	0.0333	0.10836	Curated_gene_sets:bystrykh_hematopoiesis_stem_cell_qtl_trans
Curated_gene_sets:serv...	93	0.121	0.00874	0.0978	0.10838	Curated_gene_sets:servitja_islet_hnf1a_targets_dn
Curated_gene_sets:mull...	72	0.129	0.0082	0.104	0.10846	Curated_gene_sets:mullighan_npm1_mutated_signature_2_dn
GO_cc:go_very_low_dens...	19	0.293	0.00961	0.238	0.10846	GO_cc:go_very_low_density_lipoprotein_particle
GO_cc:go_triglyceride_...	19	0.293	0.00961	0.238	0.10846	GO_cc:go_triglyceride_rich_lipoprotein_particle
GO_bp:go_regulation_of...	17	0.286	0.00885	0.231	0.10854	GO_bp:go_regulation_of_triglyceride_biosynthetic_process
GO_bp:go_regulation_of...	59	0.157	0.00903	0.127	0.10863	GO_bp:go_regulation_of_reactive_oxygen_species_biosynthetic_process
Curated_gene_sets:valk...	4	0.62	0.00932	0.502	0.10865	Curated_gene_sets:valk_aml_with_t_8_21_translocation
GO_bp:go_reproductive_...	365	0.0627	0.00891	0.0509	0.10905	GO_bp:go_reproductive_system_development
Curated_gene_sets:lim_...	106	0.115	0.00891	0.0937	0.10906	Curated_gene_sets:lim_mammary_luminal_mature_up
GO_mf:go_protein_tyros...	40	0.179	0.00848	0.145	0.10907	GO_mf:go_protein_tyrosine_serine_threonine_phosphatase_activity
Curated_gene_sets:kayo...	79	0.129	0.00859	0.105	0.10924	Curated_gene_sets:kayo_calorie_restriction_muscle_dn
Curated_gene_sets:papa...	50	0.157	0.00835	0.128	0.10928	Curated_gene_sets:papaspyridonos_unstable_aterosclerotic_plaque_up
GO_bp:go_cellular_resp...	515	0.0531	0.00893	0.0432	0.10928	GO_bp:go_cellular_response_to_hormone_stimulus
GO_bp:go_complement_ac...	12	0.35	0.00912	0.285	0.10928	GO_bp:go_complement_activation_alternative_pathway
Curated_gene_sets:bioc...	29	0.23	0.0093	0.187	0.10929	Curated_gene_sets:biocarta_egf_pathway
GO_bp:go_nucleobase_co...	500	0.0514	0.00852	0.0418	0.10942	GO_bp:go_nucleobase_containing_small_molecule_metabolic_process
Curated_gene_sets:reac...	16	0.241	0.00724	0.196	0.10943	Curated_gene_sets:reactome_pre_notch_processing_in_golgi
GO_bp:go_branching_inv...	16	0.301	0.00905	0.245	0.10945	GO_bp:go_branching_involved_in_salivary_gland_morphogenesis
GO_bp:go_macromolecule...	55	0.143	0.00795	0.116	0.10947	GO_bp:go_macromolecule_deacylation
GO_cc:go_cell_substrat...	374	0.0605	0.00871	0.0492	0.10948	GO_cc:go_cell_substrate_junction
GO_bp:go_negative_regu...	23	0.252	0.00908	0.205	0.10979	GO_bp:go_negative_regulation_of_oxidoreductase_activity
GO_bp:go_regulation_of...	14	0.334	0.00939	0.272	0.10986	GO_bp:go_regulation_of_inositol_phosphate_biosynthetic_process
Curated_gene_sets:pepp...	20	0.237	0.00798	0.194	0.10999	Curated_gene_sets:pepper_chronic_lymphocytic_leukemia_dn
Curated_gene_sets:reac...	9	0.37	0.00835	0.302	0.11006	Curated_gene_sets:reactome_membrane_binding_and_targetting_of_gag_proteins
Curated_gene_sets:kang...	8	0.438	0.00932	0.358	0.11006	Curated_gene_sets:kang_cisplatin_resistance_dn
Curated_gene_sets:reac...	35	0.204	0.00907	0.167	0.11012	Curated_gene_sets:reactome_ncam1_interactions
GO_bp:go_mitochondrial...	71	0.131	0.0083	0.107	0.11013	GO_bp:go_mitochondrial_respiratory_chain_complex_assembly
Curated_gene_sets:iwan...	163	0.088	0.00841	0.0718	0.11021	Curated_gene_sets:iwanaga_carcinogenesis_by_kras_up
GO_bp:go_regulation_of...	120	0.104	0.00854	0.0849	0.11031	GO_bp:go_regulation_of_establishment_of_protein_localization_to_mitochondrion
GO_bp:go_regulation_of...	57	0.153	0.00869	0.125	0.11039	GO_bp:go_regulation_of_phospholipid_metabolic_process
Curated_gene_sets:bioc...	27	0.234	0.00914	0.191	0.11059	Curated_gene_sets:biocarta_erk_pathway
GO_bp:go_fatty_acid_el...	12	0.374	0.00975	0.306	0.11066	GO_bp:go_fatty_acid_elongation
GO_cc:go_intracellular...	1164	0.0353	0.00876	0.0289	0.11066	GO_cc:go_intracellular_vesicle
GO_bp:go_regulation_of...	14	0.326	0.00918	0.267	0.11081	GO_bp:go_regulation_of_antigen_processing_and_presentation_of_peptide_antigen
GO_bp:go_positive_regu...	63	0.145	0.00862	0.118	0.11083	GO_bp:go_positive_regulation_of_cell_cycle_phase_transition
GO_bp:go_regulation_of...	31	0.197	0.00824	0.161	0.11085	GO_bp:go_regulation_of_centrosome_duplication
GO_cc:go_wash_complex	10	0.363	0.00864	0.297	0.11085	GO_cc:go_wash_complex
GO_bp:go_hormone_biosy...	47	0.17	0.00874	0.139	0.11115	GO_bp:go_hormone_biosynthetic_process
GO_bp:go_trna_metaboli...	171	0.0803	0.00786	0.0658	0.11125	GO_bp:go_trna_metabolic_process
Curated_gene_sets:kim_...	95	0.116	0.00848	0.0951	0.11134	Curated_gene_sets:kim_mycn_amplification_targets_dn
GO_bp:go_organic_catio...	20	0.292	0.00981	0.239	0.11139	GO_bp:go_organic_cation_transport
GO_mf:go_neurexin_fami...	7	0.478	0.00951	0.392	0.11144	GO_mf:go_neurexin_family_protein_binding
Curated_gene_sets:bild...	183	0.0827	0.00837	0.0678	0.11145	Curated_gene_sets:bild_myc_oncogenic_signature
GO_bp:go_cellular_resp...	15	0.286	0.00834	0.235	0.11166	GO_bp:go_cellular_response_to_sterol
Curated_gene_sets:nuyt...	933	0.0375	0.00837	0.0308	0.11169	Curated_gene_sets:nuytten_ezh2_targets_dn
GO_bp:go_rna_splicing	332	0.0628	0.00852	0.0516	0.11169	GO_bp:go_rna_splicing
GO_bp:go_regulation_of...	140	0.102	0.00904	0.0838	0.11171	GO_bp:go_regulation_of_jak_stat_cascade
GO_bp:go_regulation_of...	140	0.102	0.00904	0.0838	0.11171	GO_bp:go_regulation_of_stat_cascade
Curated_gene_sets:abe_...	31	0.182	0.00761	0.149	0.11178	Curated_gene_sets:abe_vegfa_targets_2hr
Curated_gene_sets:st_e...	29	0.228	0.00923	0.187	0.11183	Curated_gene_sets:st_erk1_erk2_mapk_pathway
GO_bp:go_protein_modif...	100	0.115	0.00865	0.0948	0.11184	GO_bp:go_protein_modification_by_small_protein_removal
GO_bp:go_neurotrophin_...	14	0.302	0.00848	0.248	0.11184	GO_bp:go_neurotrophin_trk_receptor_signaling_pathway
Curated_gene_sets:reac...	63	0.138	0.00823	0.114	0.11188	Curated_gene_sets:reactome_pi3k_cascade
Curated_gene_sets:xu_a...	26	0.198	0.0076	0.163	0.1119	Curated_gene_sets:xu_akt1_targets_6hr
Curated_gene_sets:tsen...	100	0.116	0.00869	0.0953	0.11192	Curated_gene_sets:tseng_irs1_targets_up
GO_bp:go_early_endosom...	11	0.394	0.00983	0.324	0.112	GO_bp:go_early_endosome_to_golgi_transport
Curated_gene_sets:reac...	9	0.436	0.00984	0.359	0.11203	Curated_gene_sets:reactome_ethanol_oxidation
Curated_gene_sets:schu...	18	0.245	0.00781	0.202	0.11213	Curated_gene_sets:schuringa_stat5a_targets_up
GO_bp:go_negative_regu...	416	0.0566	0.00858	0.0466	0.11215	GO_bp:go_negative_regulation_of_transport
Curated_gene_sets:pid_...	40	0.176	0.00835	0.145	0.11224	Curated_gene_sets:pid_syndecan_1_pathway
GO_bp:go_regulation_of...	872	0.0391	0.00846	0.0322	0.11225	GO_bp:go_regulation_of_protein_localization
Curated_gene_sets:niel...	18	0.275	0.00877	0.227	0.11233	Curated_gene_sets:nielsen_leiomyosarcoma_cnn1_dn
GO_bp:go_regulation_of...	24	0.206	0.00758	0.17	0.11244	GO_bp:go_regulation_of_sprouting_angiogenesis
Curated_gene_sets:bake...	15	0.291	0.00847	0.24	0.1125	Curated_gene_sets:baker_hematopoiesis_stat3_targets
GO_bp:go_negative_regu...	122	0.1	0.00828	0.0825	0.11251	GO_bp:go_negative_regulation_of_sequence_specific_dna_binding_transcription_factor_activity
Curated_gene_sets:scha...	44	0.177	0.0088	0.146	0.11262	Curated_gene_sets:schaeffer_sox9_targets_in_prostate_development_dn
Curated_gene_sets:urs_...	27	0.238	0.0093	0.196	0.11262	Curated_gene_sets:urs_adipocyte_differentiation_dn
GO_bp:go_vascular_endo...	13	0.325	0.0088	0.268	0.11275	GO_bp:go_vascular_endothelial_growth_factor_signaling_pathway
Curated_gene_sets:bioc...	16	0.265	0.00796	0.219	0.11281	Curated_gene_sets:biocarta_arap_pathway
GO_mf:go_histone_deace...	94	0.119	0.00868	0.0985	0.11283	GO_mf:go_histone_deacetylase_binding
Curated_gene_sets:byst...	5	0.476	0.008	0.393	0.11294	Curated_gene_sets:bystrykh_scp2_qtl
GO_bp:go_otic_vesicle_...	15	0.302	0.00879	0.25	0.11304	GO_bp:go_otic_vesicle_development
GO_bp:go_folic_acid_me...	17	0.253	0.00783	0.209	0.11313	GO_bp:go_folic_acid_metabolic_process
GO_mf:go_dna_secondary...	19	0.247	0.00808	0.204	0.11316	GO_mf:go_dna_secondary_structure_binding
GO_bp:go_hippocampus_d...	65	0.14	0.00846	0.116	0.11318	GO_bp:go_hippocampus_development
Curated_gene_sets:gros...	75	0.131	0.0085	0.108	0.11327	Curated_gene_sets:gross_hypoxia_via_hif1a_up
Curated_gene_sets:mikk...	37	0.19	0.00866	0.157	0.11335	Curated_gene_sets:mikkelsen_mef_icp_with_h3k4me3_and_h3k27me3
GO_bp:go_substrate_adh...	37	0.189	0.00864	0.156	0.11343	GO_bp:go_substrate_adhesion_dependent_cell_spreading
GO_cc:go_kinetochore	108	0.106	0.00825	0.0877	0.11343	GO_cc:go_kinetochore
GO_bp:go_regulation_of...	330	0.0636	0.00861	0.0527	0.11344	GO_bp:go_regulation_of_innate_immune_response
Curated_gene_sets:reac...	15	0.295	0.00859	0.244	0.11348	Curated_gene_sets:reactome_synthesis_of_glycosylphosphatidylinositol_gpi
Curated_gene_sets:matz...	20	0.236	0.00795	0.196	0.11348	Curated_gene_sets:matzuk_implantation_and_uterine
GO_mf:go_voltage_gated...	173	0.0906	0.00891	0.075	0.11351	GO_mf:go_voltage_gated_ion_channel_activity
Curated_gene_sets:reac...	8	0.435	0.00925	0.36	0.11359	Curated_gene_sets:reactome_the_activation_of_arylsulfatases
GO_bp:go_carbohydrate_...	160	0.0897	0.00849	0.0743	0.11376	GO_bp:go_carbohydrate_derivative_catabolic_process
GO_bp:go_negative_regu...	17	0.265	0.00822	0.22	0.11378	GO_bp:go_negative_regulation_of_stem_cell_proliferation
Curated_gene_sets:wata...	87	0.12	0.00842	0.0997	0.11386	Curated_gene_sets:watanabe_rectal_cancer_radiotherapy_responsive_dn
GO_bp:go_methylation	264	0.0659	0.00799	0.0546	0.11386	GO_bp:go_methylation
Curated_gene_sets:reac...	67	0.131	0.00803	0.108	0.11402	Curated_gene_sets:reactome_transcriptional_regulation_of_white_adipocyte_differentiation
GO_bp:go_fatty_acid_ho...	12	0.258	0.0067	0.214	0.11412	GO_bp:go_fatty_acid_homeostasis
GO_bp:go_enzyme_linked...	640	0.0468	0.00874	0.0389	0.11413	GO_bp:go_enzyme_linked_receptor_protein_signaling_pathway
GO_cc:go_nuclear_inclu...	12	0.331	0.00862	0.275	0.11414	GO_cc:go_nuclear_inclusion_body
GO_bp:go_oxidation_red...	821	0.0404	0.0085	0.0335	0.11415	GO_bp:go_oxidation_reduction_process
GO_bp:go_iron_ion_tran...	49	0.159	0.00837	0.132	0.11418	GO_bp:go_iron_ion_transport
GO_cc:go_transcription...	12	0.258	0.00671	0.214	0.11418	GO_cc:go_transcription_factor_tftc_complex
GO_bp:go_negative_regu...	58	0.159	0.00909	0.132	0.11422	GO_bp:go_negative_regulation_of_cell_division
Curated_gene_sets:nutt...	44	0.17	0.00849	0.141	0.11425	Curated_gene_sets:nutt_gbm_vs_ao_glioma_dn
Curated_gene_sets:lope...	4	0.562	0.00845	0.467	0.11432	Curated_gene_sets:lopez_mbd_targets_imprinted_and_x_linked
Curated_gene_sets:tera...	25	0.239	0.00897	0.199	0.11446	Curated_gene_sets:terao_aox4_targets_skin_dn
Curated_gene_sets:kegg...	40	0.192	0.00911	0.16	0.11455	Curated_gene_sets:kegg_abc_transporters
GO_bp:go_rna_splicing_...	246	0.0714	0.00836	0.0594	0.11455	GO_bp:go_rna_splicing_via_transesterification_reactions
GO_bp:go_positive_regu...	122	0.105	0.00868	0.0872	0.11459	GO_bp:go_positive_regulation_of_binding
GO_bp:go_dna_templated...	95	0.11	0.00805	0.0916	0.11465	GO_bp:go_dna_templated_transcription_termination
GO_cc:go_cell_cortex	228	0.077	0.00869	0.0641	0.11465	GO_cc:go_cell_cortex
Curated_gene_sets:bioc...	11	0.342	0.00852	0.284	0.11466	Curated_gene_sets:biocarta_egfr_smrte_pathway
GO_bp:go_myelin_mainte...	12	0.366	0.00952	0.304	0.11474	GO_bp:go_myelin_maintenance
Curated_gene_sets:mizu...	18	0.256	0.00817	0.213	0.11478	Curated_gene_sets:mizushima_autophagosome_formation
GO_bp:go_positive_regu...	79	0.131	0.00873	0.109	0.11495	GO_bp:go_positive_regulation_of_reactive_oxygen_species_metabolic_process
Curated_gene_sets:amit...	35	0.192	0.00852	0.16	0.11497	Curated_gene_sets:amit_egf_response_60_mcf10a
Curated_gene_sets:howl...	32	0.198	0.00841	0.165	0.11502	Curated_gene_sets:howlin_cited1_targets_1_up
Curated_gene_sets:bioc...	9	0.367	0.00827	0.306	0.11506	Curated_gene_sets:biocarta_eif2_pathway
Curated_gene_sets:geis...	33	0.187	0.00805	0.156	0.11507	Curated_gene_sets:geiss_response_to_dsrna_up
GO_bp:go_positive_regu...	28	0.218	0.00868	0.182	0.11508	GO_bp:go_positive_regulation_of_bmp_signaling_pathway
GO_bp:go_negative_regu...	31	0.222	0.0093	0.185	0.11515	GO_bp:go_negative_regulation_of_cation_channel_activity
GO_bp:go_retrograde_ve...	71	0.131	0.00829	0.109	0.11515	GO_bp:go_retrograde_vesicle_mediated_transport_golgi_to_er
GO_mf:go_enzyme_inhibi...	324	0.0643	0.00862	0.0536	0.11518	GO_mf:go_enzyme_inhibitor_activity
Curated_gene_sets:wang...	13	0.378	0.0102	0.315	0.1154	Curated_gene_sets:wang_response_to_paclitaxel_via_mapk8_up
Curated_gene_sets:burt...	95	0.104	0.0076	0.0869	0.11571	Curated_gene_sets:burton_adipogenesis_3
GO_bp:go_regulation_of...	20	0.257	0.00864	0.215	0.11573	GO_bp:go_regulation_of_ruffle_assembly
GO_cc:go_contractile_f...	198	0.0828	0.00871	0.0692	0.11579	GO_cc:go_contractile_fiber
GO_bp:go_forebrain_cel...	55	0.149	0.00832	0.125	0.116	GO_bp:go_forebrain_cell_migration
GO_cc:go_envelope	1009	0.0359	0.00832	0.03	0.116	GO_cc:go_envelope
Curated_gene_sets:bioc...	26	0.229	0.00878	0.192	0.11611	Curated_gene_sets:biocarta_vip_pathway
GO_bp:go_regulation_of...	92	0.115	0.00824	0.096	0.11621	GO_bp:go_regulation_of_leukocyte_chemotaxis
GO_bp:go_gland_develop...	365	0.0608	0.00864	0.0509	0.11639	GO_bp:go_gland_development
Curated_gene_sets:kuma...	10	0.272	0.00646	0.228	0.1165	Curated_gene_sets:kumamoto_response_to_nutlin_3a_dn
Curated_gene_sets:garg...	31	0.194	0.00809	0.162	0.11653	Curated_gene_sets:gargalovic_response_to_oxidized_phospholipids_yellow_up
GO_bp:go_hepaticobilia...	117	0.106	0.00861	0.0892	0.11664	GO_bp:go_hepaticobiliary_system_development
GO_bp:go_white_fat_cel...	11	0.339	0.00846	0.285	0.11694	GO_bp:go_white_fat_cell_differentiation
GO_bp:go_retrograde_tr...	13	0.284	0.00771	0.239	0.11713	GO_bp:go_retrograde_transport_endosome_to_plasma_membrane
GO_cc:go_site_of_polar...	132	0.104	0.00893	0.0872	0.11714	GO_cc:go_site_of_polarized_growth
GO_bp:go_protein_alpha...	13	0.314	0.0085	0.264	0.1172	GO_bp:go_protein_alpha_1_2_demannosylation
GO_bp:go_protein_deman...	13	0.314	0.0085	0.264	0.1172	GO_bp:go_protein_demannosylation
GO_bp:go_metanephric_n...	20	0.271	0.0091	0.228	0.11734	GO_bp:go_metanephric_nephron_morphogenesis
Curated_gene_sets:reac...	14	0.329	0.00925	0.277	0.11743	Curated_gene_sets:reactome_platelet_sensitization_by_ldl
GO_bp:go_neurogenesis	1297	0.0331	0.00863	0.0279	0.11745	GO_bp:go_neurogenesis
Curated_gene_sets:kegg...	303	0.0661	0.00858	0.0557	0.11752	Curated_gene_sets:kegg_pathways_in_cancer
Curated_gene_sets:pid_...	59	0.134	0.0077	0.113	0.11764	Curated_gene_sets:pid_hdac_classi_pathway
GO_bp:go_cell_separati...	17	0.301	0.00934	0.254	0.11764	GO_bp:go_cell_separation_after_cytokinesis
GO_bp:go_regulation_of...	140	0.0958	0.00849	0.0807	0.11778	GO_bp:go_regulation_of_muscle_contraction
GO_cc:go_ada2_gcn5_ada...	13	0.282	0.00764	0.238	0.11807	GO_cc:go_ada2_gcn5_ada3_transcription_activator_complex
GO_bp:go_regulation_of...	119	0.0996	0.00814	0.0841	0.11815	GO_bp:go_regulation_of_regulated_secretory_pathway
Curated_gene_sets:huan...	137	0.0958	0.0084	0.0809	0.11823	Curated_gene_sets:huang_gata2_targets_up
GO_cc:go_transcription...	277	0.0692	0.00859	0.0585	0.11823	GO_cc:go_transcription_factor_complex
GO_mf:go_histone_binding	154	0.0909	0.00844	0.0768	0.11829	GO_mf:go_histone_binding
Curated_gene_sets:ma_p...	19	0.245	0.00804	0.207	0.11834	Curated_gene_sets:ma_pituitary_fetal_vs_adult_dn
GO_bp:go_regulation_of...	38	0.169	0.0078	0.143	0.11847	GO_bp:go_regulation_of_centrosome_cycle
GO_bp:go_mechanosensor...	12	0.364	0.00948	0.308	0.11848	GO_bp:go_mechanosensory_behavior
Curated_gene_sets:west...	16	0.294	0.00883	0.249	0.11861	Curated_gene_sets:west_adrenocortical_carcinoma_vs_adenoma_up
GO_bp:go_regulation_of...	13	0.312	0.00845	0.264	0.1187	GO_bp:go_regulation_of_hepatocyte_proliferation
Curated_gene_sets:wu_a...	11	0.33	0.00823	0.279	0.11876	Curated_gene_sets:wu_alzheimer_disease_up
Curated_gene_sets:cair...	14	0.34	0.00956	0.288	0.11877	Curated_gene_sets:cairo_pml_targets_bound_by_myc_dn
GO_bp:go_negative_regu...	33	0.212	0.00914	0.179	0.11877	GO_bp:go_negative_regulation_of_mrna_metabolic_process
Curated_gene_sets:gros...	129	0.0964	0.0082	0.0816	0.11888	Curated_gene_sets:gross_hypoxia_via_elk3_and_hif1a_up
GO_cc:go_escrt_complex	26	0.229	0.00877	0.194	0.11894	GO_cc:go_escrt_complex
Curated_gene_sets:gouy...	9	0.332	0.00748	0.281	0.11895	Curated_gene_sets:gouyer_tati_targets_up
Curated_gene_sets:breu...	21	0.264	0.00909	0.224	0.11922	Curated_gene_sets:breuhahn_growth_factor_signaling_in_liver_cancer
GO_bp:go_regulation_of...	47	0.169	0.00868	0.143	0.11923	GO_bp:go_regulation_of_humoral_immune_response
GO_bp:go_transition_me...	98	0.112	0.00832	0.0951	0.11924	GO_bp:go_transition_metal_ion_transport
[truncated: 8,898 more rows]
