# Supplementary material for: Human longevity: 25 genetic loci associated in 389,166 UK biobank participants
Source: Aging (Albany NY). 2017 Dec 6;9(12):2504–20. doi: 10.18632/aging.101334 (PMC5764389; doi:10.18632/aging.101334)
Supplement: Supplementary file 6 [file aging-09-2504-s006.xlsx]

## Sheet: Sheet1
UK Biobank GWAS of parents attained age - eQTLs identified by the FUMA SNP2GENE tool
	Included tissues: Adipose Subcutaneous, Adipose Visceral Omentum, Adrenal Gland, Artery Aorta, Artery Coronary, Artery Tibial, Brain Caudate basal ganglia, Brain Cerebellar Hemisphere, Brain Cortex, Brain Nucleus accumbens basal ganglia, Breast Mammary Tissue, Cells Transformed fibroblasts, Esophagus Mucosa, Esophagus Muscularis, Heart Atrial Appendage, Heart Left Ventricle, Liver, Lung, Muscle S…
	Only eQTL associations that passed the multiple-testing threshold (FDR p<0.05) are included
uniqID : Unique ID of SNPs consists of chr:position:allele1:allele2 where alleles are alphabetically ordered.
chr : chromosome
pos : position on hg19
DB : Data source of eQTLs. Currently GTEx, BloodeQTL, BIOS and BRAINEAC are available.
tissue : Tissue type
Gene : ENSG ID
Symbol : Gene symbol
P-value : P-value of eQTLs
FDR : FDR of eQTLs. Note that method to compute FDR differs between data sources.
tz : T-statistics or z score depends on data source.
RiskIncAllele : Risk increasing allele obtained from input GWAS summary statistics.
	NA if signed effect is not provided in the input file.
	SNPs which are not in the input GWAS but included from reference panel are also encoded as "NA".
alignedDirection : The direction of effect to gene expression after aligning risk increasing allele of GWAS and tested allele of eQTLs.
	+ when the risk increasing allele increase the expression of the gene, "-" when the risk increasing allele decrease the expression of the gene.
	NA if risk increasing allele is not defined.
	Please refer the tutorial on the FUMA website for details.
uniqID	db	tissue	gene	chr	pos	symbol	testedAllele	p	tz	FDR	RiskIncAllele	alignedDirection	eqtlMapFilt
1:109814880:C:T	BIOSQTL	BIOS_eQTL_geneLevel	ENSG00000031698	1	109814880	SARS	T	8e-05	3.94447	0.0440236	T	+	1
1:109814880:C:T	BIOSQTL	BIOS_eQTL_geneLevel	ENSG00000116299	1	109814880	KIAA1324	T	1.5765e-15	-7.97078	0	T	-	1
1:109814880:C:T	BIOSQTL	BIOS_eQTL_geneLevel	ENSG00000134222	1	109814880	PSRC1	T	3.58136e-91	20.2498	0	T	+	1
1:109814880:C:T	BIOSQTL	BIOS_eQTL_geneLevel	ENSG00000143126	1	109814880	CELSR2	T	6.11315e-05	-4.00837	0.0349151	T	-	1
1:109817192:A:G	BIOSQTL	BIOS_eQTL_geneLevel	ENSG00000116299	1	109817192	KIAA1324	G	8.29436e-15	-7.76286	0	G	-	1
1:109817192:A:G	BIOSQTL	BIOS_eQTL_geneLevel	ENSG00000134222	1	109817192	PSRC1	G	1.85805e-152	26.3014	0	G	+	1
1:109817192:A:G	BIOSQTL	BIOS_eQTL_geneLevel	ENSG00000143126	1	109817192	CELSR2	G	1.51566e-05	-4.32636	0.00995518	G	-	1
1:109817590:G:T	BIOSQTL	BIOS_eQTL_geneLevel	ENSG00000116299	1	109817590	KIAA1324	T	9.29112e-15	-7.74843	0	T	-	1
1:109817590:G:T	BIOSQTL	BIOS_eQTL_geneLevel	ENSG00000134222	1	109817590	PSRC1	T	2.95335e-152	26.2836	0	T	+	1
1:109817590:G:T	BIOSQTL	BIOS_eQTL_geneLevel	ENSG00000143126	1	109817590	CELSR2	T	1.612e-05	-4.31269	0.0104875	T	-	1
1:109817838:C:T	BIOSQTL	BIOS_eQTL_geneLevel	ENSG00000116299	1	109817838	KIAA1324	T	1.85195e-12	-7.045	0	C	+	1
1:109817838:C:T	BIOSQTL	BIOS_eQTL_geneLevel	ENSG00000134222	1	109817838	PSRC1	T	1.69116e-146	25.7751	0	C	-	1
1:109817838:C:T	BIOSQTL	BIOS_eQTL_geneLevel	ENSG00000143126	1	109817838	CELSR2	T	1.98643e-06	-4.7547	0.00155047	C	+	1
1:109817838:C:T	BIOSQTL	BIOS_eQTL_geneLevel	ENSG00000181754	1	109817838	AMIGO1	T	7.65347e-05	3.95515	0.0422447	C	-	1
1:109818306:G:T	BIOSQTL	BIOS_eQTL_geneLevel	ENSG00000116299	1	109818306	KIAA1324	G	1.04055e-14	-7.734	0	T	+	1
1:109818306:G:T	BIOSQTL	BIOS_eQTL_geneLevel	ENSG00000134222	1	109818306	PSRC1	G	2.95335e-152	26.2836	0	T	-	1
1:109818306:G:T	BIOSQTL	BIOS_eQTL_geneLevel	ENSG00000143126	1	109818306	CELSR2	G	1.7188e-05	-4.29849	0.0111981	T	+	1
1:109818530:C:T	BIOSQTL	BIOS_eQTL_geneLevel	ENSG00000116299	1	109818530	KIAA1324	C	1.63877e-14	-7.67614	0	T	+	1
1:109818530:C:T	BIOSQTL	BIOS_eQTL_geneLevel	ENSG00000134222	1	109818530	PSRC1	C	7.73411e-152	26.2471	0	T	-	1
1:109818530:C:T	BIOSQTL	BIOS_eQTL_geneLevel	ENSG00000143126	1	109818530	CELSR2	C	2.21734e-05	-4.2417	0.0139985	T	+	1
1:109821307:G:T	BIOSQTL	BIOS_eQTL_geneLevel	ENSG00000116299	1	109821307	KIAA1324	G	4.08802e-15	-7.85205	0	T	+	1
1:109821307:G:T	BIOSQTL	BIOS_eQTL_geneLevel	ENSG00000134222	1	109821307	PSRC1	G	4.15553e-153	26.3582	0	T	-	1
1:109821307:G:T	BIOSQTL	BIOS_eQTL_geneLevel	ENSG00000143126	1	109821307	CELSR2	G	1.06863e-05	-4.40276	0.00729419	T	+	1
1:109821511:G:T	BIOSQTL	BIOS_eQTL_geneLevel	ENSG00000116299	1	109821511	KIAA1324	T	4.26104e-13	-7.24694	0	G	+	1
1:109821511:G:T	BIOSQTL	BIOS_eQTL_geneLevel	ENSG00000134222	1	109821511	PSRC1	T	1.33413e-147	25.8734	0	G	-	1
1:109821511:G:T	BIOSQTL	BIOS_eQTL_geneLevel	ENSG00000143126	1	109821511	CELSR2	T	8.11422e-07	-4.93254	0.000722003	G	+	1
1:109821511:G:T	BIOSQTL	BIOS_eQTL_geneLevel	ENSG00000181754	1	109821511	AMIGO1	T	3.63711e-05	4.12958	0.0219714	G	-	1
1:109821797:A:G	BIOSQTL	BIOS_eQTL_geneLevel	ENSG00000116299	1	109821797	KIAA1324	G	4.85547e-15	-7.83043	0	A	+	1
1:109821797:A:G	BIOSQTL	BIOS_eQTL_geneLevel	ENSG00000134222	1	109821797	PSRC1	G	7.62384e-153	26.335	0	A	-	1
1:109821797:A:G	BIOSQTL	BIOS_eQTL_geneLevel	ENSG00000143126	1	109821797	CELSR2	G	8.41281e-06	-4.45422	0.00582946	A	+	1
1:109822143:A:G	BIOSQTL	BIOS_eQTL_geneLevel	ENSG00000116299	1	109822143	KIAA1324	G	4.46972e-15	-7.84084	0	A	+	1
1:109822143:A:G	BIOSQTL	BIOS_eQTL_geneLevel	ENSG00000134222	1	109822143	PSRC1	G	9.92402e-153	26.3251	0	A	-	1
1:109822143:A:G	BIOSQTL	BIOS_eQTL_geneLevel	ENSG00000143126	1	109822143	CELSR2	G	8.16543e-06	-4.46069	0.00561182	A	+	1
1:109822166:A:G	BIOSQTL	BIOS_eQTL_geneLevel	ENSG00000116299	1	109822166	KIAA1324	G	4.46972e-15	-7.84084	0	A	+	1
1:109822166:A:G	BIOSQTL	BIOS_eQTL_geneLevel	ENSG00000134222	1	109822166	PSRC1	G	9.92402e-153	26.3251	0	A	-	1
1:109822166:A:G	BIOSQTL	BIOS_eQTL_geneLevel	ENSG00000143126	1	109822166	CELSR2	G	8.16543e-06	-4.46069	0.00561182	A	+	1
6:160981736:A:C	BIOSQTL	BIOS_eQTL_geneLevel	ENSG00000198670	6	160981736	LPA	A	3.13456e-06	-4.66162	0.00236444	A	-	1
6:160983209:C:T	BIOSQTL	BIOS_eQTL_geneLevel	ENSG00000198670	6	160983209	LPA	C	1.4099e-06	-4.82357	0.00117849	C	-	1
6:160985526:A:G	BIOSQTL	BIOS_eQTL_geneLevel	ENSG00000146477	6	160985526	SLC22A3	A	1.4816e-13	7.38888	0	A	+	1
6:160985526:A:G	BIOSQTL	BIOS_eQTL_geneLevel	ENSG00000213071	6	160985526	LPAL2	A	1.4816e-13	7.38888	0	A	+	1
6:160986787:C:T	BIOSQTL	BIOS_eQTL_geneLevel	ENSG00000198670	6	160986787	LPA	T	3.59198e-07	-5.08922	0.000253356	T	-	1
6:160987728:A:C	BIOSQTL	BIOS_eQTL_geneLevel	ENSG00000198670	6	160987728	LPA	C	4.58769e-07	-5.04279	0.000337367	NA	NA	1
6:160988957:A:C	BIOSQTL	BIOS_eQTL_geneLevel	ENSG00000198670	6	160988957	LPA	A	4.6797e-07	-5.03881	0.000337115	A	-	1
6:160989198:G:T	BIOSQTL	BIOS_eQTL_geneLevel	ENSG00000198670	6	160989198	LPA	G	5.04483e-07	-5.02456	0.000400491	G	-	1
6:160994143:A:G	BIOSQTL	BIOS_eQTL_geneLevel	ENSG00000198670	6	160994143	LPA	G	6.13876e-07	-4.9868	0.000514944	G	-	1
6:160995199:A:G	BIOSQTL	BIOS_eQTL_geneLevel	ENSG00000198670	6	160995199	LPA	A	5.81687e-07	-4.99709	0.000499947	A	-	1
6:160996327:A:G	BIOSQTL	BIOS_eQTL_geneLevel	ENSG00000198670	6	160996327	LPA	G	6.06299e-07	-4.98914	0.000515081	G	-	1
6:160996797:A:G	BIOSQTL	BIOS_eQTL_geneLevel	ENSG00000198670	6	160996797	LPA	G	6.06299e-07	-4.98914	0.000515081	G	-	1
6:160997118:A:T	BIOSQTL	BIOS_eQTL_geneLevel	ENSG00000146477	6	160997118	SLC22A3	T	2.7923e-12	6.98782	0	T	+	1
6:160997118:A:T	BIOSQTL	BIOS_eQTL_geneLevel	ENSG00000213071	6	160997118	LPAL2	T	2.7923e-12	6.98782	0	T	+	1
6:160999191:C:T	BIOSQTL	BIOS_eQTL_geneLevel	ENSG00000198670	6	160999191	LPA	C	6.06299e-07	-4.98914	0.000515081	C	-	1
6:161001207:C:T	BIOSQTL	BIOS_eQTL_geneLevel	ENSG00000198670	6	161001207	LPA	C	6.06299e-07	-4.98914	0.000515081	C	-	1
6:161002817:A:G	BIOSQTL	BIOS_eQTL_geneLevel	ENSG00000198670	6	161002817	LPA	G	6.06299e-07	-4.98914	0.000515081	G	-	1
6:161003265:A:G	BIOSQTL	BIOS_eQTL_geneLevel	ENSG00000198670	6	161003265	LPA	G	6.06299e-07	-4.98914	0.000515081	G	-	1
6:161005468:C:T	BIOSQTL	BIOS_eQTL_geneLevel	ENSG00000198670	6	161005468	LPA	C	6.06299e-07	-4.98914	0.000515081	C	-	1
6:161005610:C:T	BIOSQTL	BIOS_eQTL_geneLevel	ENSG00000146477	6	161005610	SLC22A3	T	2.7923e-12	6.98782	0	T	+	1
6:161005610:C:T	BIOSQTL	BIOS_eQTL_geneLevel	ENSG00000213071	6	161005610	LPAL2	T	2.7923e-12	6.98782	0	T	+	1
6:161006988:C:T	BIOSQTL	BIOS_eQTL_geneLevel	ENSG00000198670	6	161006988	LPA	C	6.06299e-07	-4.98914	0.000515081	C	-	1
6:161007496:C:G	BIOSQTL	BIOS_eQTL_geneLevel	ENSG00000198670	6	161007496	LPA	C	6.06299e-07	-4.98914	0.000515081	C	-	1
6:161007538:C:G	BIOSQTL	BIOS_eQTL_geneLevel	ENSG00000198670	6	161007538	LPA	C	6.06299e-07	-4.98914	0.000515081	C	-	1
6:161008115:C:G	BIOSQTL	BIOS_eQTL_geneLevel	ENSG00000198670	6	161008115	LPA	G	6.06299e-07	-4.98914	0.000515081	G	-	1
6:161009684:C:T	BIOSQTL	BIOS_eQTL_geneLevel	ENSG00000198670	6	161009684	LPA	C	6.06299e-07	-4.98914	0.000515081	C	-	1
6:161010118:A:G	BIOSQTL	BIOS_eQTL_geneLevel	ENSG00000146477	6	161010118	SLC22A3	G	2.7923e-12	6.98782	0	G	+	1
6:161010118:A:G	BIOSQTL	BIOS_eQTL_geneLevel	ENSG00000213071	6	161010118	LPAL2	G	2.7923e-12	6.98782	0	G	+	1
6:161010766:A:T	BIOSQTL	BIOS_eQTL_geneLevel	ENSG00000198670	6	161010766	LPA	T	6.06299e-07	-4.98914	0.000515081	T	-	1
6:161012749:C:T	BIOSQTL	BIOS_eQTL_geneLevel	ENSG00000198670	6	161012749	LPA	T	6.51803e-07	-4.97519	0.000530251	T	-	1
6:161013019:A:G	BIOSQTL	BIOS_eQTL_geneLevel	ENSG00000198670	6	161013019	LPA	G	5.62695e-07	-5.0034	0.000463086	G	-	1
6:161013322:A:G	BIOSQTL	BIOS_eQTL_geneLevel	ENSG00000198670	6	161013322	LPA	A	5.62695e-07	-5.0034	0.000463086	A	-	1
6:161015762:A:G	BIOSQTL	BIOS_eQTL_geneLevel	ENSG00000198670	6	161015762	LPA	A	1.2667e-07	-5.28358	8.31762e-05	A	-	1
6:161017120:G:T	BIOSQTL	BIOS_eQTL_geneLevel	ENSG00000198670	6	161017120	LPA	T	3.5965e-08	-5.50951	4.57065e-05	T	-	1
6:161017451:C:T	BIOSQTL	BIOS_eQTL_geneLevel	ENSG00000198670	6	161017451	LPA	C	3.5965e-08	-5.50951	4.57065e-05	C	-	1
6:161018464:C:G	BIOSQTL	BIOS_eQTL_geneLevel	ENSG00000198670	6	161018464	LPA	G	3.12652e-08	-5.53405	4.584e-05	G	-	1
6:161021873:C:G	BIOSQTL	BIOS_eQTL_geneLevel	ENSG00000198670	6	161021873	LPA	C	3.39386e-08	-5.51978	4.57614e-05	C	-	1
6:161022423:C:T	BIOSQTL	BIOS_eQTL_geneLevel	ENSG00000198670	6	161022423	LPA	C	3.12652e-08	-5.53404	4.584e-05	C	-	1
6:161023209:A:T	BIOSQTL	BIOS_eQTL_geneLevel	ENSG00000198670	6	161023209	LPA	A	3.12652e-08	-5.53404	4.584e-05	A	-	1
6:161023402:A:G	BIOSQTL	BIOS_eQTL_geneLevel	ENSG00000198670	6	161023402	LPA	A	3.12652e-08	-5.53404	4.584e-05	A	-	1
6:161023460:G:T	BIOSQTL	BIOS_eQTL_geneLevel	ENSG00000198670	6	161023460	LPA	G	4.33576e-08	-5.47641	4.55192e-05	G	-	1
6:161023620:C:T	BIOSQTL	BIOS_eQTL_geneLevel	ENSG00000198670	6	161023620	LPA	T	4.68683e-08	-5.46276	4.54365e-05	T	-	1
6:161024848:C:T	BIOSQTL	BIOS_eQTL_geneLevel	ENSG00000198670	6	161024848	LPA	T	3.12652e-08	-5.53404	4.584e-05	T	-	1
6:161025288:A:G	BIOSQTL	BIOS_eQTL_geneLevel	ENSG00000198670	6	161025288	LPA	A	3.12652e-08	-5.53404	4.584e-05	A	-	1
6:161026455:C:T	BIOSQTL	BIOS_eQTL_geneLevel	ENSG00000198670	6	161026455	LPA	T	3.12652e-08	-5.53404	4.584e-05	T	-	1
6:161026515:A:G	BIOSQTL	BIOS_eQTL_geneLevel	ENSG00000198670	6	161026515	LPA	G	3.12652e-08	-5.53404	4.584e-05	G	-	1
6:161030469:C:T	BIOSQTL	BIOS_eQTL_geneLevel	ENSG00000198670	6	161030469	LPA	C	3.12652e-08	-5.53404	4.584e-05	C	-	1
6:161030880:A:G	BIOSQTL	BIOS_eQTL_geneLevel	ENSG00000198670	6	161030880	LPA	A	3.12652e-08	-5.53404	4.584e-05	A	-	1
6:161031172:C:T	BIOSQTL	BIOS_eQTL_geneLevel	ENSG00000198670	6	161031172	LPA	C	3.12652e-08	-5.53404	4.584e-05	C	-	1
6:161031253:C:T	BIOSQTL	BIOS_eQTL_geneLevel	ENSG00000198670	6	161031253	LPA	T	3.12652e-08	-5.53404	4.584e-05	T	-	1
6:161031718:A:T	BIOSQTL	BIOS_eQTL_geneLevel	ENSG00000198670	6	161031718	LPA	T	3.12652e-08	-5.53404	4.584e-05	T	-	1
6:161031894:C:G	BIOSQTL	BIOS_eQTL_geneLevel	ENSG00000198670	6	161031894	LPA	G	3.47197e-08	-5.5158	4.57326e-05	G	-	1
6:161032089:C:T	BIOSQTL	BIOS_eQTL_geneLevel	ENSG00000198670	6	161032089	LPA	C	2.45547e-08	-5.5764	3.45562e-05	C	-	1
6:161032481:A:G	BIOSQTL	BIOS_eQTL_geneLevel	ENSG00000198670	6	161032481	LPA	G	7.01447e-08	-5.39074	6.18603e-05	G	-	1
6:161055671:A:G	BIOSQTL	BIOS_eQTL_geneLevel	ENSG00000198670	6	161055671	LPA	G	2.92526e-07	-5.12817	0.000211543	NA	NA	1
6:161055827:C:G	BIOSQTL	BIOS_eQTL_geneLevel	ENSG00000198670	6	161055827	LPA	G	2.40795e-08	-5.57969	3.45722e-05	G	-	1
6:161067892:G:T	BIOSQTL	BIOS_eQTL_geneLevel	ENSG00000198670	6	161067892	LPA	T	3.61743e-09	-5.90062	6.00528e-06	T	-	1
6:161068064:C:G	BIOSQTL	BIOS_eQTL_geneLevel	ENSG00000198670	6	161068064	LPA	C	3.67496e-08	-5.50572	4.56908e-05	C	-	1
6:161068176:G:T	BIOSQTL	BIOS_eQTL_geneLevel	ENSG00000198670	6	161068176	LPA	G	3.67496e-08	-5.50572	4.56908e-05	G	-	1
6:161068891:A:G	BIOSQTL	BIOS_eQTL_geneLevel	ENSG00000198670	6	161068891	LPA	A	3.67496e-08	-5.50572	4.56908e-05	A	-	1
6:161069941:A:G	BIOSQTL	BIOS_eQTL_geneLevel	ENSG00000198670	6	161069941	LPA	A	3.67496e-08	-5.50572	4.56908e-05	A	-	1
6:161069952:C:T	BIOSQTL	BIOS_eQTL_geneLevel	ENSG00000198670	6	161069952	LPA	C	3.67496e-08	-5.50572	4.56908e-05	C	-	1
6:161070870:C:G	BIOSQTL	BIOS_eQTL_geneLevel	ENSG00000198670	6	161070870	LPA	G	3.67496e-08	-5.50572	4.56908e-05	G	-	1
6:161071212:A:T	BIOSQTL	BIOS_eQTL_geneLevel	ENSG00000198670	6	161071212	LPA	T	3.67496e-08	-5.50572	4.56908e-05	A	+	1
6:161072331:A:G	BIOSQTL	BIOS_eQTL_geneLevel	ENSG00000198670	6	161072331	LPA	G	3.67496e-08	-5.50572	4.56908e-05	A	+	1
6:161076247:A:G	BIOSQTL	BIOS_eQTL_geneLevel	ENSG00000198670	6	161076247	LPA	A	3.98309e-08	-5.49146	4.55996e-05	G	+	1
6:161076516:C:T	BIOSQTL	BIOS_eQTL_geneLevel	ENSG00000198670	6	161076516	LPA	T	3.98309e-08	-5.49146	4.55996e-05	C	+	1
6:161076527:C:T	BIOSQTL	BIOS_eQTL_geneLevel	ENSG00000198670	6	161076527	LPA	C	4.6974e-08	-5.46234	4.54313e-05	T	+	1
6:161077342:G:T	BIOSQTL	BIOS_eQTL_geneLevel	ENSG00000198670	6	161077342	LPA	G	3.98309e-08	-5.49146	4.55996e-05	T	+	1
6:161078021:G:T	BIOSQTL	BIOS_eQTL_geneLevel	ENSG00000198670	6	161078021	LPA	G	3.98309e-08	-5.49146	4.55996e-05	T	+	1
6:161081331:A:G	BIOSQTL	BIOS_eQTL_geneLevel	ENSG00000198670	6	161081331	LPA	A	3.98309e-08	-5.49146	4.55996e-05	G	+	1
6:161081842:C:T	BIOSQTL	BIOS_eQTL_geneLevel	ENSG00000198670	6	161081842	LPA	C	5.06538e-08	-5.4489	4.53489e-05	T	+	1
6:161089307:C:T	BIOSQTL	BIOS_eQTL_geneLevel	ENSG00000146477	6	161089307	SLC22A3	T	7.44031e-08	5.3802	6.17735e-05	T	+	1
6:161089307:C:T	BIOSQTL	BIOS_eQTL_geneLevel	ENSG00000213071	6	161089307	LPAL2	T	7.44031e-08	5.3802	6.17735e-05	T	+	1
6:161108144:A:C	BIOSQTL	BIOS_eQTL_geneLevel	ENSG00000146477	6	161108144	SLC22A3	A	4.78848e-07	5.03468	0.000358231	A	+	1
6:161108144:A:C	BIOSQTL	BIOS_eQTL_geneLevel	ENSG00000213071	6	161108144	LPAL2	A	4.78848e-07	5.03468	0.000358231	A	+	1
6:161123451:C:T	BIOSQTL	BIOS_eQTL_geneLevel	ENSG00000146477	6	161123451	SLC22A3	C	7.97411e-07	4.93607	0.000711838	C	+	1
6:161123451:C:T	BIOSQTL	BIOS_eQTL_geneLevel	ENSG00000213071	6	161123451	LPAL2	C	7.97411e-07	4.93607	0.000711838	C	+	1
8:27437573:C:T	BIOSQTL	BIOS_eQTL_geneLevel	ENSG00000120903	8	27437573	CHRNA2	T	1.04703e-10	6.46015	0	NA	NA	1
8:27437573:C:T	BIOSQTL	BIOS_eQTL_geneLevel	ENSG00000120915	8	27437573	EPHX2	T	4.26654e-14	7.55279	0	NA	NA	1
8:27437573:C:T	BIOSQTL	BIOS_eQTL_geneLevel	ENSG00000234770	8	27437573	GULOP	T	1.56423e-09	-6.0375	6.11546e-06	NA	NA	1
8:27438306:A:C	BIOSQTL	BIOS_eQTL_geneLevel	ENSG00000120903	8	27438306	CHRNA2	C	1.26102e-10	6.43193	0	C	+	1
8:27438306:A:C	BIOSQTL	BIOS_eQTL_geneLevel	ENSG00000120915	8	27438306	EPHX2	C	4.26654e-14	7.55279	0	C	+	1
8:27438306:A:C	BIOSQTL	BIOS_eQTL_geneLevel	ENSG00000234770	8	27438306	GULOP	C	1.43592e-09	-6.05128	6.12708e-06	C	-	1
8:27442064:A:G	BIOSQTL	BIOS_eQTL_geneLevel	ENSG00000120903	8	27442064	CHRNA2	A	4.82171e-10	6.22483	0	A	+	1
8:27442064:A:G	BIOSQTL	BIOS_eQTL_geneLevel	ENSG00000120915	8	27442064	EPHX2	A	4.01069e-13	7.25522	0	A	+	1
8:27442064:A:G	BIOSQTL	BIOS_eQTL_geneLevel	ENSG00000234770	8	27442064	GULOP	A	7.40815e-09	-5.78133	1.1828e-05	A	-	1
9:22003367:A:G	BIOSQTL	BIOS_eQTL_geneLevel	ENSG00000147883	9	22003367	CDKN2B	A	6.00675e-08	-5.41858	5.07929e-05	A	-	1
9:22009698:C:G	BIOSQTL	BIOS_eQTL_geneLevel	ENSG00000147883	9	22009698	CDKN2B	C	1.46424e-07	-5.25681	8.83539e-05	C	-	1
9:22011642:A:G	BIOSQTL	BIOS_eQTL_geneLevel	ENSG00000147883	9	22011642	CDKN2B	A	1.4478e-12	7.07945	0	A	+	1
9:22011642:A:G	BIOSQTL	BIOS_eQTL_geneLevel	ENSG00000240498	9	22011642	CDKN2B-AS1	A	4.41528e-05	4.08463	0.0260791	A	+	1
9:22015465:A:C	BIOSQTL	BIOS_eQTL_geneLevel	ENSG00000147883	9	22015465	CDKN2B	A	9.58504e-12	6.81268	0	A	+	1
9:22015465:A:C	BIOSQTL	BIOS_eQTL_geneLevel	ENSG00000240498	9	22015465	CDKN2B-AS1	A	4.23263e-05	4.0945	0.0251623	A	+	1
9:22019129:A:G	BIOSQTL	BIOS_eQTL_geneLevel	ENSG00000147883	9	22019129	CDKN2B	G	3.921e-12	6.94007	0	G	+	1
9:22019673:C:G	BIOSQTL	BIOS_eQTL_geneLevel	ENSG00000147883	9	22019673	CDKN2B	C	3.55072e-12	6.95403	0	C	+	1
9:22022376:C:T	BIOSQTL	BIOS_eQTL_geneLevel	ENSG00000147883	9	22022376	CDKN2B	T	1.07117e-11	6.79672	0	T	+	1
9:22022376:C:T	BIOSQTL	BIOS_eQTL_geneLevel	ENSG00000240498	9	22022376	CDKN2B-AS1	T	5.73639e-05	4.02348	0.033033	T	+	1
9:22026077:C:T	BIOSQTL	BIOS_eQTL_geneLevel	ENSG00000147883	9	22026077	CDKN2B	C	5.89352e-12	6.88227	0	C	+	1
9:22026594:A:G	BIOSQTL	BIOS_eQTL_geneLevel	ENSG00000147883	9	22026594	CDKN2B	A	1.98121e-12	7.0358	0	A	+	1
9:22026639:A:T	BIOSQTL	BIOS_eQTL_geneLevel	ENSG00000147883	9	22026639	CDKN2B	T	1.98121e-12	7.0358	0	T	+	1
9:22027402:A:G	BIOSQTL	BIOS_eQTL_geneLevel	ENSG00000147883	9	22027402	CDKN2B	A	1.61079e-12	7.06462	0	A	+	1
9:22027402:A:G	BIOSQTL	BIOS_eQTL_geneLevel	ENSG00000240498	9	22027402	CDKN2B-AS1	A	8.76713e-05	3.92245	0.0476447	A	+	1
9:22029080:A:G	BIOSQTL	BIOS_eQTL_geneLevel	ENSG00000147883	9	22029080	CDKN2B	A	1.09823e-12	7.1176	0	A	+	1
9:22029080:A:G	BIOSQTL	BIOS_eQTL_geneLevel	ENSG00000240498	9	22029080	CDKN2B-AS1	A	9.00302e-05	3.91603	0.0490183	A	+	1
9:22029547:C:T	BIOSQTL	BIOS_eQTL_geneLevel	ENSG00000147883	9	22029547	CDKN2B	C	1.78661e-12	7.05021	0	C	+	1
9:22031005:A:G	BIOSQTL	BIOS_eQTL_geneLevel	ENSG00000147883	9	22031005	CDKN2B	G	7.25252e-08	5.3849	6.18116e-05	A	-	1
9:22033366:C:T	BIOSQTL	BIOS_eQTL_geneLevel	ENSG00000147883	9	22033366	CDKN2B	C	7.87366e-08	5.37018	6.16626e-05	T	-	1
9:22033366:C:T	BIOSQTL	BIOS_eQTL_geneLevel	ENSG00000240498	9	22033366	CDKN2B-AS1	C	8.00668e-05	3.94428	0.0440285	T	-	1
9:22036112:G:T	BIOSQTL	BIOS_eQTL_geneLevel	ENSG00000147883	9	22036112	CDKN2B	G	7.89115e-08	5.36971	6.16592e-05	T	-	1
9:22036112:G:T	BIOSQTL	BIOS_eQTL_geneLevel	ENSG00000240498	9	22036112	CDKN2B-AS1	G	7.98e-05	3.94505	0.0438389	T	-	1
9:22036367:C:T	BIOSQTL	BIOS_eQTL_geneLevel	ENSG00000147883	9	22036367	CDKN2B	C	8.43347e-08	5.35766	6.7178e-05	T	-	1
9:22036367:C:T	BIOSQTL	BIOS_eQTL_geneLevel	ENSG00000240498	9	22036367	CDKN2B-AS1	C	7.29664e-05	3.96659	0.0406086	T	-	1
9:22040765:C:T	BIOSQTL	BIOS_eQTL_geneLevel	ENSG00000147883	9	22040765	CDKN2B	C	6.01348e-08	5.4185	5.07901e-05	T	-	1
9:22040765:C:T	BIOSQTL	BIOS_eQTL_geneLevel	ENSG00000240498	9	22040765	CDKN2B-AS1	C	8.81091e-05	3.92124	0.0479654	T	-	1
9:22043612:C:T	BIOSQTL	BIOS_eQTL_geneLevel	ENSG00000147883	9	22043612	CDKN2B	T	3.24076e-10	6.28684	0	T	+	1
9:22043612:C:T	BIOSQTL	BIOS_eQTL_geneLevel	ENSG00000240498	9	22043612	CDKN2B-AS1	T	6.00027e-05	4.01297	0.0343562	T	+	1
9:22043926:A:G	BIOSQTL	BIOS_eQTL_geneLevel	ENSG00000147883	9	22043926	CDKN2B	G	1.19109e-12	7.10642	0	G	+	1
9:22043926:A:G	BIOSQTL	BIOS_eQTL_geneLevel	ENSG00000240498	9	22043926	CDKN2B-AS1	G	8.49459e-05	3.93	0.0463674	G	+	1
9:22045317:C:T	BIOSQTL	BIOS_eQTL_geneLevel	ENSG00000147883	9	22045317	CDKN2B	C	1.03767e-07	5.32019	8.35794e-05	T	-	1
9:22049555:C:T	BIOSQTL	BIOS_eQTL_geneLevel	ENSG00000147883	9	22049555	CDKN2B	T	6.75493e-11	6.52617	0	T	+	1
9:22049555:C:T	BIOSQTL	BIOS_eQTL_geneLevel	ENSG00000240498	9	22049555	CDKN2B-AS1	T	9.25006e-06	4.4341	0.00635129	T	+	1
9:22049656:A:G	BIOSQTL	BIOS_eQTL_geneLevel	ENSG00000147883	9	22049656	CDKN2B	A	6.56819e-11	6.5304	0	A	+	1
9:22049656:A:G	BIOSQTL	BIOS_eQTL_geneLevel	ENSG00000240498	9	22049656	CDKN2B-AS1	A	8.33475e-06	4.45654	0.00577365	A	+	1
9:22050613:A:G	BIOSQTL	BIOS_eQTL_geneLevel	ENSG00000147883	9	22050613	CDKN2B	G	1.2794e-10	6.42976	0	G	+	1
9:22050613:A:G	BIOSQTL	BIOS_eQTL_geneLevel	ENSG00000240498	9	22050613	CDKN2B-AS1	G	8.87132e-06	4.44301	0.00606474	G	+	1
9:22050898:A:G	BIOSQTL	BIOS_eQTL_geneLevel	ENSG00000147883	9	22050898	CDKN2B	A	1.9884e-06	4.75467	0.00155039	G	-	1
9:22051670:C:G	BIOSQTL	BIOS_eQTL_geneLevel	ENSG00000147883	9	22051670	CDKN2B	G	8.68913e-08	5.35225	6.71291e-05	C	-	1
9:22052734:C:T	BIOSQTL	BIOS_eQTL_geneLevel	ENSG00000147883	9	22052734	CDKN2B	T	7.11668e-08	5.38839	6.1836e-05	C	-	1
9:22052810:C:G	BIOSQTL	BIOS_eQTL_geneLevel	ENSG00000147883	9	22052810	CDKN2B	C	8.54952e-11	6.49075	0	C	+	1
9:22052810:C:G	BIOSQTL	BIOS_eQTL_geneLevel	ENSG00000240498	9	22052810	CDKN2B-AS1	C	9.31899e-06	4.43258	0.00637222	C	+	1
9:22053687:A:G	BIOSQTL	BIOS_eQTL_geneLevel	ENSG00000147883	9	22053687	CDKN2B	G	1.06096e-10	6.4581	0	G	+	1
9:22053687:A:G	BIOSQTL	BIOS_eQTL_geneLevel	ENSG00000240498	9	22053687	CDKN2B-AS1	G	8.70778e-06	4.44702	0.00598107	G	+	1
9:22053709:A:G	BIOSQTL	BIOS_eQTL_geneLevel	ENSG00000147883	9	22053709	CDKN2B	G	1.06096e-10	6.4581	0	G	+	1
9:22053709:A:G	BIOSQTL	BIOS_eQTL_geneLevel	ENSG00000240498	9	22053709	CDKN2B-AS1	G	8.70778e-06	4.44702	0.00598107	G	+	1
9:22054040:C:T	BIOSQTL	BIOS_eQTL_geneLevel	ENSG00000147883	9	22054040	CDKN2B	C	1.12426e-07	5.30541	8.34353e-05	T	-	1
9:22054690:C:T	BIOSQTL	BIOS_eQTL_geneLevel	ENSG00000147883	9	22054690	CDKN2B	C	8.032e-11	6.50019	0	C	+	1
9:22054690:C:T	BIOSQTL	BIOS_eQTL_geneLevel	ENSG00000240498	9	22054690	CDKN2B-AS1	C	8.29597e-06	4.4575	0.00575494	C	+	1
9:22055048:A:G	BIOSQTL	BIOS_eQTL_geneLevel	ENSG00000147883	9	22055048	CDKN2B	G	7.61579e-11	6.50805	0	G	+	1
9:22055048:A:G	BIOSQTL	BIOS_eQTL_geneLevel	ENSG00000240498	9	22055048	CDKN2B-AS1	G	9.91586e-06	4.41901	0.0068291	G	+	1
9:22056295:C:T	BIOSQTL	BIOS_eQTL_geneLevel	ENSG00000147883	9	22056295	CDKN2B	T	2.01661e-07	5.1979	0.000131356	C	-	1
9:22056359:A:G	BIOSQTL	BIOS_eQTL_geneLevel	ENSG00000147883	9	22056359	CDKN2B	A	2.90667e-07	5.12958	0.000211612	G	-	1
9:22056499:A:G	BIOSQTL	BIOS_eQTL_geneLevel	ENSG00000147883	9	22056499	CDKN2B	A	1.21251e-07	5.29176	8.33009e-05	A	+	1
9:22056499:A:G	BIOSQTL	BIOS_eQTL_geneLevel	ENSG00000240498	9	22056499	CDKN2B-AS1	A	3.7625e-05	4.1217	0.0227314	A	+	1
9:22059905:C:T	BIOSQTL	BIOS_eQTL_geneLevel	ENSG00000147883	9	22059905	CDKN2B	T	1.34212e-07	5.27306	8.30519e-05	C	-	1
9:22060136:A:G	BIOSQTL	BIOS_eQTL_geneLevel	ENSG00000147883	9	22060136	CDKN2B	A	1.1517e-07	5.30112	8.33889e-05	G	-	1
9:22060935:A:G	BIOSQTL	BIOS_eQTL_geneLevel	ENSG00000147883	9	22060935	CDKN2B	A	3.44052e-08	5.51755	4.57404e-05	G	-	1
9:22061614:A:G	BIOSQTL	BIOS_eQTL_geneLevel	ENSG00000147883	9	22061614	CDKN2B	A	3.94268e-08	5.49341	4.56152e-05	G	-	1
9:22064391:A:G	BIOSQTL	BIOS_eQTL_geneLevel	ENSG00000147883	9	22064391	CDKN2B	G	3.65e-08	5.50704	4.57012e-05	A	-	1
9:22064465:A:G	BIOSQTL	BIOS_eQTL_geneLevel	ENSG00000147883	9	22064465	CDKN2B	A	1.34212e-07	5.27316	8.30519e-05	G	-	1
9:22065002:C:G	BIOSQTL	BIOS_eQTL_geneLevel	ENSG00000147883	9	22065002	CDKN2B	G	1.86249e-06	4.76791	0.00146143	G	+	1
9:22065657:C:G	BIOSQTL	BIOS_eQTL_geneLevel	ENSG00000147883	9	22065657	CDKN2B	G	3.99212e-08	5.49131	4.55996e-05	C	-	1
9:22067004:A:G	BIOSQTL	BIOS_eQTL_geneLevel	ENSG00000147883	9	22067004	CDKN2B	G	3.87184e-08	5.49668	4.56334e-05	A	-	1
9:22067276:A:T	BIOSQTL	BIOS_eQTL_geneLevel	ENSG00000147883	9	22067276	CDKN2B	T	3.87184e-08	5.49668	4.56334e-05	A	-	1
9:22067542:C:T	BIOSQTL	BIOS_eQTL_geneLevel	ENSG00000147883	9	22067542	CDKN2B	C	3.87184e-08	5.49668	4.56334e-05	T	-	1
9:22067554:C:T	BIOSQTL	BIOS_eQTL_geneLevel	ENSG00000147883	9	22067554	CDKN2B	C	3.87184e-08	5.49668	4.56334e-05	T	-	1
9:22067593:A:G	BIOSQTL	BIOS_eQTL_geneLevel	ENSG00000147883	9	22067593	CDKN2B	G	2.65565e-06	4.69591	0.00199522	G	+	1
9:22067830:A:G	BIOSQTL	BIOS_eQTL_geneLevel	ENSG00000147883	9	22067830	CDKN2B	G	4.19594e-08	5.48247	4.55451e-05	A	-	1
9:22068652:A:G	BIOSQTL	BIOS_eQTL_geneLevel	ENSG00000147883	9	22068652	CDKN2B	G	4.53604e-08	5.4687	4.54623e-05	A	-	1
9:22071750:C:T	BIOSQTL	BIOS_eQTL_geneLevel	ENSG00000147883	9	22071750	CDKN2B	T	7.74914e-06	-4.47182	0.00535706	T	-	1
9:22071751:A:G	BIOSQTL	BIOS_eQTL_geneLevel	ENSG00000147883	9	22071751	CDKN2B	A	7.21231e-08	-5.38561	6.18151e-05	NA	NA	1
9:22072719:A:G	BIOSQTL	BIOS_eQTL_geneLevel	ENSG00000147883	9	22072719	CDKN2B	G	3.5556e-06	4.63581	0.00258182	G	+	1
9:22077543:C:T	BIOSQTL	BIOS_eQTL_geneLevel	ENSG00000147883	9	22077543	CDKN2B	C	4.7735e-07	5.0354	0.000358289	T	-	1
9:22103183:G:T	BIOSQTL	BIOS_eQTL_geneLevel	ENSG00000147883	9	22103183	CDKN2B	T	3.91567e-05	4.11256	0.0235434	T	+	1
9:22119195:C:T	BIOSQTL	BIOS_eQTL_geneLevel	ENSG00000147883	9	22119195	CDKN2B	C	3.83283e-11	-6.61032	0	C	-	1
9:22121349:A:T	BIOSQTL	BIOS_eQTL_geneLevel	ENSG00000147883	9	22121349	CDKN2B	T	3.68543e-10	-6.26674	0	T	-	1
12:111708458:A:C	BIOSQTL	BIOS_eQTL_geneLevel	ENSG00000111252	12	111708458	SH2B3	C	2.03736e-09	5.99496	6.07977e-06	C	+	1
12:111708458:A:C	BIOSQTL	BIOS_eQTL_geneLevel	ENSG00000198324	12	111708458	FAM109A	C	5.63198e-10	-6.20037	0	C	-	1
12:111715197:C:T	BIOSQTL	BIOS_eQTL_geneLevel	ENSG00000111252	12	111715197	SH2B3	T	2.12698e-09	5.98786	6.07423e-06	T	+	1
12:111715197:C:T	BIOSQTL	BIOS_eQTL_geneLevel	ENSG00000198324	12	111715197	FAM109A	T	7.31532e-07	-4.95272	0.000623547	T	-	1
12:111833788:A:G	BIOSQTL	BIOS_eQTL_geneLevel	ENSG00000111252	12	111833788	SH2B3	G	9.01553e-11	6.48272	0	A	-	1
12:111833788:A:G	BIOSQTL	BIOS_eQTL_geneLevel	ENSG00000198324	12	111833788	FAM109A	G	5.12075e-09	-5.84302	1.19204e-05	A	+	1
12:111865049:C:G	BIOSQTL	BIOS_eQTL_geneLevel	ENSG00000111252	12	111865049	SH2B3	C	1.54488e-12	7.07045	0	G	-	1
12:111865049:C:G	BIOSQTL	BIOS_eQTL_geneLevel	ENSG00000198324	12	111865049	FAM109A	C	3.4911e-07	-5.09461	0.000253629	G	+	1
12:111884608:C:T	BIOSQTL	BIOS_eQTL_geneLevel	ENSG00000111252	12	111884608	SH2B3	T	1.21372e-12	7.1038	0	C	-	1
12:111884608:C:T	BIOSQTL	BIOS_eQTL_geneLevel	ENSG00000198324	12	111884608	FAM109A	T	3.47638e-07	-5.09545	0.000248259	C	+	1
12:111904371:A:T	BIOSQTL	BIOS_eQTL_geneLevel	ENSG00000111252	12	111904371	SH2B3	T	4.20246e-12	6.93028	0	A	-	1
12:111904371:A:T	BIOSQTL	BIOS_eQTL_geneLevel	ENSG00000198324	12	111904371	FAM109A	T	5.1054e-08	-5.44759	4.53438e-05	A	+	1
12:111910219:A:G	BIOSQTL	BIOS_eQTL_geneLevel	ENSG00000111252	12	111910219	SH2B3	A	4.20246e-12	6.93028	0	G	-	1
12:111910219:A:G	BIOSQTL	BIOS_eQTL_geneLevel	ENSG00000198324	12	111910219	FAM109A	A	5.1054e-08	-5.44759	4.53438e-05	G	+	1
12:111932800:C:T	BIOSQTL	BIOS_eQTL_geneLevel	ENSG00000111252	12	111932800	SH2B3	C	1.76618e-12	7.05198	0	T	-	1
12:111932800:C:T	BIOSQTL	BIOS_eQTL_geneLevel	ENSG00000198324	12	111932800	FAM109A	C	3.76641e-07	-5.08032	0.000269193	T	+	1
12:111973358:A:G	BIOSQTL	BIOS_eQTL_geneLevel	ENSG00000111252	12	111973358	SH2B3	A	1.56279e-12	7.06892	0	G	-	1
12:111973358:A:G	BIOSQTL	BIOS_eQTL_geneLevel	ENSG00000198324	12	111973358	FAM109A	A	3.3715e-07	-5.1013	0.000243046	G	+	1
12:112007756:C:T	BIOSQTL	BIOS_eQTL_geneLevel	ENSG00000111252	12	112007756	SH2B3	C	1.29539e-12	7.095	0	T	-	1
12:112007756:C:T	BIOSQTL	BIOS_eQTL_geneLevel	ENSG00000198324	12	112007756	FAM109A	C	4.19256e-07	-5.05986	0.000295318	T	+	1
12:112059557:C:T	BIOSQTL	BIOS_eQTL_geneLevel	ENSG00000089022	12	112059557	MAPKAPK5	T	6.79935e-05	-3.98309	0.0382349	T	-	1
12:112059557:C:T	BIOSQTL	BIOS_eQTL_geneLevel	ENSG00000111252	12	112059557	SH2B3	T	5.57605e-09	5.82907	1.18956e-05	T	+	1
12:112059557:C:T	BIOSQTL	BIOS_eQTL_geneLevel	ENSG00000111275	12	112059557	ALDH2	T	5.07782e-13	-7.22305	0	T	-	1
12:112059557:C:T	BIOSQTL	BIOS_eQTL_geneLevel	ENSG00000111275	12	112059557	ALDH2	T	5.03532e-14	-7.53088	0	T	-	1
12:112059557:C:T	BIOSQTL	BIOS_eQTL_geneLevel	ENSG00000234608	12	112059557	MAPKAPK5-AS1	T	6.79935e-05	-3.98309	0.0382349	T	-	1
12:112059557:C:T	BIOSQTL	BIOS_eQTL_geneLevel	ENSG00000234608	12	112059557	MAPKAPK5-AS1	T	1.18102e-09	-6.08272	6.15498e-06	T	-	1
12:112072424:A:G	BIOSQTL	BIOS_eQTL_geneLevel	ENSG00000111252	12	112072424	SH2B3	G	2.52991e-08	5.57126	3.45423e-05	G	+	1
12:112072424:A:G	BIOSQTL	BIOS_eQTL_geneLevel	ENSG00000111275	12	112072424	ALDH2	G	9.87772e-13	-7.13206	0	G	-	1
12:112072424:A:G	BIOSQTL	BIOS_eQTL_geneLevel	ENSG00000111275	12	112072424	ALDH2	G	3.29395e-13	-7.28167	0	G	-	1
12:112072424:A:G	BIOSQTL	BIOS_eQTL_geneLevel	ENSG00000234608	12	112072424	MAPKAPK5-AS1	G	2.18093e-08	-5.59691	3.4646e-05	G	-	1
12:112083162:C:T	BIOSQTL	BIOS_eQTL_geneLevel	ENSG00000111252	12	112083162	SH2B3	T	2.96315e-08	5.54368	4.59005e-05	T	+	1
12:112083162:C:T	BIOSQTL	BIOS_eQTL_geneLevel	ENSG00000111275	12	112083162	ALDH2	T	1.33918e-12	-7.09018	0	T	-	1
12:112083162:C:T	BIOSQTL	BIOS_eQTL_geneLevel	ENSG00000111275	12	112083162	ALDH2	T	3.28907e-13	-7.28198	0	T	-	1
12:112083162:C:T	BIOSQTL	BIOS_eQTL_geneLevel	ENSG00000234608	12	112083162	MAPKAPK5-AS1	T	1.85508e-08	-5.62487	3.47786e-05	T	-	1
12:112151742:A:C	BIOSQTL	BIOS_eQTL_geneLevel	ENSG00000111275	12	112151742	ALDH2	A	2.49115e-05	4.21576	0.0154972	NA	NA	1
12:112151742:A:C	BIOSQTL	BIOS_eQTL_geneLevel	ENSG00000111275	12	112151742	ALDH2	A	1.71261e-05	4.29952	0.0111623	NA	NA	1
12:112200150:C:T	BIOSQTL	BIOS_eQTL_geneLevel	ENSG00000111275	12	112200150	ALDH2	T	3.06751e-13	-7.29132	0	C	+	1
12:112200150:C:T	BIOSQTL	BIOS_eQTL_geneLevel	ENSG00000111275	12	112200150	ALDH2	T	6.8039e-14	-7.4915	0	C	+	1
12:112200150:C:T	BIOSQTL	BIOS_eQTL_geneLevel	ENSG00000226469	12	112200150	ADAM1B	T	7.43868e-05	-3.96166	0.0413889	C	+	1
12:112200150:C:T	BIOSQTL	BIOS_eQTL_geneLevel	ENSG00000234608	12	112200150	MAPKAPK5-AS1	T	1.23661e-08	-5.69452	2.34192e-05	C	+	1
12:112273499:C:T	BIOSQTL	BIOS_eQTL_geneLevel	ENSG00000111275	12	112273499	ALDH2	T	4.73833e-13	-7.23243	0	T	-	1
12:112273499:C:T	BIOSQTL	BIOS_eQTL_geneLevel	ENSG00000111275	12	112273499	ALDH2	T	8.77125e-14	-7.45807	0	T	-	1
12:112273499:C:T	BIOSQTL	BIOS_eQTL_geneLevel	ENSG00000234608	12	112273499	MAPKAPK5-AS1	T	2.40795e-08	-5.57967	3.45722e-05	T	-	1
12:112486818:A:G	BIOSQTL	BIOS_eQTL_geneLevel	ENSG00000089022	12	112486818	MAPKAPK5	G	7.42001e-05	-3.9624	0.0413277	G	-	1
12:112486818:A:G	BIOSQTL	BIOS_eQTL_geneLevel	ENSG00000173064	12	112486818	HECTD4	G	4.12437e-05	-4.10038	0.024625	G	-	1
12:112486818:A:G	BIOSQTL	BIOS_eQTL_geneLevel	ENSG00000226469	12	112486818	ADAM1B	G	2.75047e-05	-4.19311	0.0170026	G	-	1
12:112486818:A:G	BIOSQTL	BIOS_eQTL_geneLevel	ENSG00000234608	12	112486818	MAPKAPK5-AS1	G	7.42001e-05	-3.9624	0.0413277	G	-	1
12:112486818:A:G	BIOSQTL	BIOS_eQTL_geneLevel	ENSG00000234608	12	112486818	MAPKAPK5-AS1	G	9.90088e-10	-6.11081	6.17742e-06	G	-	1
12:112553032:A:T	BIOSQTL	BIOS_eQTL_geneLevel	ENSG00000226469	12	112553032	ADAM1B	A	2.95899e-05	-4.17659	0.0181393	A	-	1
12:112591686:A:G	BIOSQTL	BIOS_eQTL_geneLevel	ENSG00000173064	12	112591686	HECTD4	A	7.15716e-05	-3.9708	0.0399489	A	-	1
12:112591686:A:G	BIOSQTL	BIOS_eQTL_geneLevel	ENSG00000226469	12	112591686	ADAM1B	A	7.7242e-05	-3.95275	0.0425527	A	-	1
12:112684221:A:T	BIOSQTL	BIOS_eQTL_geneLevel	ENSG00000173064	12	112684221	HECTD4	A	5.60146e-05	-4.02896	0.0323942	T	+	1
12:112840766:A:G	BIOSQTL	BIOS_eQTL_geneLevel	ENSG00000173064	12	112840766	HECTD4	G	6.6914e-05	-3.98698	0.0377393	NA	NA	1
12:112871372:A:G	BIOSQTL	BIOS_eQTL_geneLevel	ENSG00000173064	12	112871372	HECTD4	G	6.02065e-05	-4.01192	0.0344924	G	-	1
12:112883476:A:G	BIOSQTL	BIOS_eQTL_geneLevel	ENSG00000173064	12	112883476	HECTD4	A	6.1965e-05	-4.00515	0.0353853	A	-	1
12:112906415:A:G	BIOSQTL	BIOS_eQTL_geneLevel	ENSG00000173064	12	112906415	HECTD4	A	6.3988e-05	-3.99746	0.0364007	G	+	1
14:75182937:A:G	BIOSQTL	BIOS_eQTL_geneLevel	ENSG00000119616	14	75182937	FCF1	G	1.01572e-05	4.41399	0.00698914	A	-	1
14:75182937:A:G	BIOSQTL	BIOS_eQTL_geneLevel	ENSG00000119630	14	75182937	PGF	G	1.91218e-14	-7.65621	0	A	+	1
14:75182937:A:G	BIOSQTL	BIOS_eQTL_geneLevel	ENSG00000119681	14	75182937	LTBP2	G	1.77224e-06	4.77792	0.0013919	A	-	1
14:75182937:A:G	BIOSQTL	BIOS_eQTL_geneLevel	ENSG00000119681	14	75182937	LTBP2	G	1.10349e-07	5.30887	8.34725e-05	A	-	1
14:75182937:A:G	BIOSQTL	BIOS_eQTL_geneLevel	ENSG00000198208	14	75182937	RPS6KL1	G	1.44928e-26	-10.667	0	A	+	1
14:75185748:A:T	BIOSQTL	BIOS_eQTL_geneLevel	ENSG00000119616	14	75185748	FCF1	T	4.2436e-05	4.09398	0.025236	A	-	1
14:75185748:A:T	BIOSQTL	BIOS_eQTL_geneLevel	ENSG00000119630	14	75185748	PGF	T	5.46521e-13	-7.21302	0	A	+	1
14:75185748:A:T	BIOSQTL	BIOS_eQTL_geneLevel	ENSG00000119681	14	75185748	LTBP2	T	1.09805e-06	4.87325	0.000950789	A	-	1
14:75185748:A:T	BIOSQTL	BIOS_eQTL_geneLevel	ENSG00000119681	14	75185748	LTBP2	T	3.68402e-07	5.08473	0.000263938	A	-	1
14:75185748:A:T	BIOSQTL	BIOS_eQTL_geneLevel	ENSG00000198208	14	75185748	RPS6KL1	T	5.5068e-30	-11.3759	0	A	+	1
14:75190455:C:T	BIOSQTL	BIOS_eQTL_geneLevel	ENSG00000119616	14	75190455	FCF1	T	4.2436e-05	4.09398	0.025236	C	-	1
14:75190455:C:T	BIOSQTL	BIOS_eQTL_geneLevel	ENSG00000119630	14	75190455	PGF	T	5.46521e-13	-7.21302	0	C	+	1
14:75190455:C:T	BIOSQTL	BIOS_eQTL_geneLevel	ENSG00000119681	14	75190455	LTBP2	T	1.09805e-06	4.87325	0.000950789	C	-	1
14:75190455:C:T	BIOSQTL	BIOS_eQTL_geneLevel	ENSG00000119681	14	75190455	LTBP2	T	3.68402e-07	5.08473	0.000263938	C	-	1
14:75190455:C:T	BIOSQTL	BIOS_eQTL_geneLevel	ENSG00000198208	14	75190455	RPS6KL1	T	5.5068e-30	-11.3759	0	C	+	1
14:75200697:A:G	BIOSQTL	BIOS_eQTL_geneLevel	ENSG00000119616	14	75200697	FCF1	G	8.47577e-06	4.45285	0.00585132	A	-	1
14:75200697:A:G	BIOSQTL	BIOS_eQTL_geneLevel	ENSG00000119630	14	75200697	PGF	G	1.32285e-14	-7.70359	0	A	+	1
14:75200697:A:G	BIOSQTL	BIOS_eQTL_geneLevel	ENSG00000119681	14	75200697	LTBP2	G	1.98054e-06	4.75548	0.00154036	A	-	1
14:75200697:A:G	BIOSQTL	BIOS_eQTL_geneLevel	ENSG00000119681	14	75200697	LTBP2	G	1.57644e-07	5.24346	8.81494e-05	A	-	1
14:75200697:A:G	BIOSQTL	BIOS_eQTL_geneLevel	ENSG00000198208	14	75200697	RPS6KL1	G	2.33452e-26	-10.6228	0	A	+	1
14:75204515:A:G	BIOSQTL	BIOS_eQTL_geneLevel	ENSG00000119616	14	75204515	FCF1	A	4.2436e-05	4.09398	0.025236	G	-	1
14:75204515:A:G	BIOSQTL	BIOS_eQTL_geneLevel	ENSG00000119630	14	75204515	PGF	A	5.46521e-13	-7.21302	0	G	+	1
14:75204515:A:G	BIOSQTL	BIOS_eQTL_geneLevel	ENSG00000119681	14	75204515	LTBP2	A	1.09805e-06	4.87325	0.000950789	G	-	1
14:75204515:A:G	BIOSQTL	BIOS_eQTL_geneLevel	ENSG00000119681	14	75204515	LTBP2	A	3.68402e-07	5.08473	0.000263938	G	-	1
14:75204515:A:G	BIOSQTL	BIOS_eQTL_geneLevel	ENSG00000198208	14	75204515	RPS6KL1	A	6.24645e-30	-11.365	0	G	+	1
14:75205661:A:G	BIOSQTL	BIOS_eQTL_geneLevel	ENSG00000119616	14	75205661	FCF1	A	4.2436e-05	4.09398	0.025236	G	-	1
14:75205661:A:G	BIOSQTL	BIOS_eQTL_geneLevel	ENSG00000119630	14	75205661	PGF	A	5.46521e-13	-7.21302	0	G	+	1
14:75205661:A:G	BIOSQTL	BIOS_eQTL_geneLevel	ENSG00000119681	14	75205661	LTBP2	A	1.09805e-06	4.87325	0.000950789	G	-	1
14:75205661:A:G	BIOSQTL	BIOS_eQTL_geneLevel	ENSG00000119681	14	75205661	LTBP2	A	3.68402e-07	5.08473	0.000263938	G	-	1
14:75205661:A:G	BIOSQTL	BIOS_eQTL_geneLevel	ENSG00000198208	14	75205661	RPS6KL1	A	6.24645e-30	-11.365	0	G	+	1
14:75211328:A:G	BIOSQTL	BIOS_eQTL_geneLevel	ENSG00000119616	14	75211328	FCF1	G	3.98755e-05	4.10828	0.0239982	A	-	1
14:75211328:A:G	BIOSQTL	BIOS_eQTL_geneLevel	ENSG00000119630	14	75211328	PGF	G	5.46521e-13	-7.21302	0	A	+	1
14:75211328:A:G	BIOSQTL	BIOS_eQTL_geneLevel	ENSG00000119681	14	75211328	LTBP2	G	1.18219e-06	4.85879	0.00100652	A	-	1
14:75211328:A:G	BIOSQTL	BIOS_eQTL_geneLevel	ENSG00000119681	14	75211328	LTBP2	G	3.76245e-07	5.08073	0.000269193	A	-	1
14:75211328:A:G	BIOSQTL	BIOS_eQTL_geneLevel	ENSG00000198208	14	75211328	RPS6KL1	G	5.25997e-30	-11.38	0	A	+	1
14:75220107:C:T	BIOSQTL	BIOS_eQTL_geneLevel	ENSG00000119616	14	75220107	FCF1	T	6.22499e-06	4.51878	0.00435643	C	-	1
14:75220107:C:T	BIOSQTL	BIOS_eQTL_geneLevel	ENSG00000119630	14	75220107	PGF	T	6.89454e-15	-7.78632	0	C	+	1
14:75220107:C:T	BIOSQTL	BIOS_eQTL_geneLevel	ENSG00000119681	14	75220107	LTBP2	T	4.7735e-07	5.03538	0.000358289	C	-	1
14:75220107:C:T	BIOSQTL	BIOS_eQTL_geneLevel	ENSG00000198208	14	75220107	RPS6KL1	T	1.79534e-27	-10.8595	0	C	+	1
14:75222337:C:G	BIOSQTL	BIOS_eQTL_geneLevel	ENSG00000119616	14	75222337	FCF1	C	6.87895e-06	4.49745	0.00481957	G	-	1
14:75222337:C:G	BIOSQTL	BIOS_eQTL_geneLevel	ENSG00000119630	14	75222337	PGF	C	2.99295e-15	-7.89106	0	G	+	1
14:75222337:C:G	BIOSQTL	BIOS_eQTL_geneLevel	ENSG00000119681	14	75222337	LTBP2	C	8.73436e-07	4.91821	0.000804924	G	-	1
14:75222337:C:G	BIOSQTL	BIOS_eQTL_geneLevel	ENSG00000119718	14	75222337	EIF2B2	C	2.37038e-05	-4.22674	0.0148212	G	+	1
14:75222337:C:G	BIOSQTL	BIOS_eQTL_geneLevel	ENSG00000198208	14	75222337	RPS6KL1	C	6.73446e-27	-10.7382	0	G	+	1
14:75224626:C:G	BIOSQTL	BIOS_eQTL_geneLevel	ENSG00000119616	14	75224626	FCF1	G	3.046e-05	4.17018	0.0185972	C	-	1
14:75224626:C:G	BIOSQTL	BIOS_eQTL_geneLevel	ENSG00000119630	14	75224626	PGF	G	3.65389e-13	-7.26765	0	C	+	1
14:75224626:C:G	BIOSQTL	BIOS_eQTL_geneLevel	ENSG00000119681	14	75224626	LTBP2	G	1.32079e-06	4.8368	0.00111296	C	-	1
14:75224626:C:G	BIOSQTL	BIOS_eQTL_geneLevel	ENSG00000119718	14	75224626	EIF2B2	G	1.21303e-28	-11.1028	0	C	+	1
14:75224626:C:G	BIOSQTL	BIOS_eQTL_geneLevel	ENSG00000119718	14	75224626	EIF2B2	G	2.01444e-07	-5.19784	0.000131356	C	+	1
14:75224626:C:G	BIOSQTL	BIOS_eQTL_geneLevel	ENSG00000198208	14	75224626	RPS6KL1	G	3.61506e-31	-11.611	0	C	+	1
14:75227098:C:T	BIOSQTL	BIOS_eQTL_geneLevel	ENSG00000119616	14	75227098	FCF1	T	6.10846e-06	4.52279	0.00428911	C	-	1
14:75227098:C:T	BIOSQTL	BIOS_eQTL_geneLevel	ENSG00000119630	14	75227098	PGF	T	6.89454e-15	-7.78632	0	C	+	1
14:75227098:C:T	BIOSQTL	BIOS_eQTL_geneLevel	ENSG00000119681	14	75227098	LTBP2	T	5.51702e-07	5.00745	0.000452633	C	-	1
14:75227098:C:T	BIOSQTL	BIOS_eQTL_geneLevel	ENSG00000119718	14	75227098	EIF2B2	T	1.42568e-23	-10.0065	0	C	+	1
14:75227098:C:T	BIOSQTL	BIOS_eQTL_geneLevel	ENSG00000119718	14	75227098	EIF2B2	T	2.17621e-05	-4.24594	0.0138094	C	+	1
14:75227098:C:T	BIOSQTL	BIOS_eQTL_geneLevel	ENSG00000198208	14	75227098	RPS6KL1	T	1.79534e-27	-10.8595	0	C	+	1
14:75228647:A:C	BIOSQTL	BIOS_eQTL_geneLevel	ENSG00000119616	14	75228647	FCF1	A	2.13771e-05	4.25011	0.0136554	C	-	1
14:75228647:A:C	BIOSQTL	BIOS_eQTL_geneLevel	ENSG00000119630	14	75228647	PGF	A	4.75044e-14	-7.53854	0	C	+	1
14:75228647:A:C	BIOSQTL	BIOS_eQTL_geneLevel	ENSG00000119681	14	75228647	LTBP2	A	4.39503e-07	5.05111	0.000311025	C	-	1
14:75228647:A:C	BIOSQTL	BIOS_eQTL_geneLevel	ENSG00000119718	14	75228647	EIF2B2	A	1.0706e-05	-4.40222	0.00730351	C	+	1
14:75228647:A:C	BIOSQTL	BIOS_eQTL_geneLevel	ENSG00000119718	14	75228647	EIF2B2	A	1.78743e-22	-9.7531	0	C	+	1
14:75228647:A:C	BIOSQTL	BIOS_eQTL_geneLevel	ENSG00000198208	14	75228647	RPS6KL1	A	8.92161e-27	-10.7121	0	C	+	1
14:75234101:G:T	BIOSQTL	BIOS_eQTL_geneLevel	ENSG00000119616	14	75234101	FCF1	T	3.15472e-05	4.1622	0.0192343	G	-	1
14:75234101:G:T	BIOSQTL	BIOS_eQTL_geneLevel	ENSG00000119630	14	75234101	PGF	T	3.88811e-13	-7.2593	0	G	+	1
14:75234101:G:T	BIOSQTL	BIOS_eQTL_geneLevel	ENSG00000119681	14	75234101	LTBP2	T	1.472e-06	4.81516	0.00121344	G	-	1
14:75234101:G:T	BIOSQTL	BIOS_eQTL_geneLevel	ENSG00000119718	14	75234101	EIF2B2	T	1.15991e-28	-11.1069	0	G	+	1
14:75234101:G:T	BIOSQTL	BIOS_eQTL_geneLevel	ENSG00000119718	14	75234101	EIF2B2	T	2.06044e-07	-5.19377	0.000136784	G	+	1
14:75234101:G:T	BIOSQTL	BIOS_eQTL_geneLevel	ENSG00000198208	14	75234101	RPS6KL1	T	3.35427e-31	-11.6175	0	G	+	1
14:75234329:A:G	BIOSQTL	BIOS_eQTL_geneLevel	ENSG00000119616	14	75234329	FCF1	G	4.4923e-06	4.58725	0.00319548	A	-	1
14:75234329:A:G	BIOSQTL	BIOS_eQTL_geneLevel	ENSG00000119630	14	75234329	PGF	G	8.66882e-15	-7.75735	0	A	+	1
14:75234329:A:G	BIOSQTL	BIOS_eQTL_geneLevel	ENSG00000119681	14	75234329	LTBP2	G	5.13497e-07	5.02136	0.000405636	A	-	1
14:75234329:A:G	BIOSQTL	BIOS_eQTL_geneLevel	ENSG00000119718	14	75234329	EIF2B2	G	2.21734e-05	-4.2418	0.0139985	A	+	1
14:75234329:A:G	BIOSQTL	BIOS_eQTL_geneLevel	ENSG00000119718	14	75234329	EIF2B2	G	1.56135e-23	-9.99752	0	A	+	1
14:75234329:A:G	BIOSQTL	BIOS_eQTL_geneLevel	ENSG00000198208	14	75234329	RPS6KL1	G	3.14786e-27	-10.8081	0	A	+	1
14:75237770:C:T	BIOSQTL	BIOS_eQTL_geneLevel	ENSG00000119616	14	75237770	FCF1	C	4.16375e-05	4.09822	0.0248046	T	-	1
14:75237770:C:T	BIOSQTL	BIOS_eQTL_geneLevel	ENSG00000119630	14	75237770	PGF	C	4.3459e-14	-7.55019	0	T	+	1
14:75237770:C:T	BIOSQTL	BIOS_eQTL_geneLevel	ENSG00000119681	14	75237770	LTBP2	C	7.80425e-07	4.94024	0.000701699	T	-	1
14:75237770:C:T	BIOSQTL	BIOS_eQTL_geneLevel	ENSG00000119718	14	75237770	EIF2B2	C	5.08602e-29	-11.1804	0	T	+	1
14:75237770:C:T	BIOSQTL	BIOS_eQTL_geneLevel	ENSG00000119718	14	75237770	EIF2B2	C	1.66961e-07	-5.2326	9.90099e-05	T	+	1
14:75237770:C:T	BIOSQTL	BIOS_eQTL_geneLevel	ENSG00000198208	14	75237770	RPS6KL1	C	4.42684e-32	-11.7894	0	T	+	1
14:75239424:C:T	BIOSQTL	BIOS_eQTL_geneLevel	ENSG00000119616	14	75239424	FCF1	T	2.61313e-05	4.20499	0.0161913	C	-	1
14:75239424:C:T	BIOSQTL	BIOS_eQTL_geneLevel	ENSG00000119630	14	75239424	PGF	T	5.95101e-13	-7.20151	0	C	+	1
14:75239424:C:T	BIOSQTL	BIOS_eQTL_geneLevel	ENSG00000119681	14	75239424	LTBP2	T	1.36945e-06	4.82944	0.0011643	C	-	1
14:75239424:C:T	BIOSQTL	BIOS_eQTL_geneLevel	ENSG00000119718	14	75239424	EIF2B2	T	1.36879e-28	-11.0922	0	C	+	1
14:75239424:C:T	BIOSQTL	BIOS_eQTL_geneLevel	ENSG00000119718	14	75239424	EIF2B2	T	1.63562e-07	-5.2365	9.35505e-05	C	+	1
14:75239424:C:T	BIOSQTL	BIOS_eQTL_geneLevel	ENSG00000198208	14	75239424	RPS6KL1	T	3.99746e-31	-11.6025	0	C	+	1
14:75242394:A:T	BIOSQTL	BIOS_eQTL_geneLevel	ENSG00000119616	14	75242394	FCF1	T	2.61313e-05	4.20499	0.0161913	T	+	1
14:75242394:A:T	BIOSQTL	BIOS_eQTL_geneLevel	ENSG00000119630	14	75242394	PGF	T	6.61335e-13	-7.18707	0	T	-	1
14:75242394:A:T	BIOSQTL	BIOS_eQTL_geneLevel	ENSG00000119681	14	75242394	LTBP2	T	1.36945e-06	4.82944	0.0011643	T	+	1
14:75242394:A:T	BIOSQTL	BIOS_eQTL_geneLevel	ENSG00000119718	14	75242394	EIF2B2	T	1.36879e-28	-11.0922	0	T	-	1
14:75242394:A:T	BIOSQTL	BIOS_eQTL_geneLevel	ENSG00000119718	14	75242394	EIF2B2	T	1.63562e-07	-5.2365	9.35505e-05	T	-	1
14:75242394:A:T	BIOSQTL	BIOS_eQTL_geneLevel	ENSG00000198208	14	75242394	RPS6KL1	T	4.74073e-31	-11.5878	0	T	-	1
14:75253847:A:G	BIOSQTL	BIOS_eQTL_geneLevel	ENSG00000119616	14	75253847	FCF1	A	7.80207e-05	3.95059	0.0428784	G	-	1
14:75253847:A:G	BIOSQTL	BIOS_eQTL_geneLevel	ENSG00000119630	14	75253847	PGF	A	3.82774e-12	-6.94329	0	G	+	1
14:75253847:A:G	BIOSQTL	BIOS_eQTL_geneLevel	ENSG00000119681	14	75253847	LTBP2	A	1.2063e-06	4.85474	0.00103716	G	-	1
14:75253847:A:G	BIOSQTL	BIOS_eQTL_geneLevel	ENSG00000119684	14	75253847	MLH3	A	5.75933e-09	-5.8235	1.18899e-05	G	+	1
14:75253847:A:G	BIOSQTL	BIOS_eQTL_geneLevel	ENSG00000119718	14	75253847	EIF2B2	A	1.97255e-27	-10.8508	0	G	+	1
14:75253847:A:G	BIOSQTL	BIOS_eQTL_geneLevel	ENSG00000119718	14	75253847	EIF2B2	A	6.23247e-08	-5.41191	5.63825e-05	G	+	1
14:75253847:A:G	BIOSQTL	BIOS_eQTL_geneLevel	ENSG00000198208	14	75253847	RPS6KL1	A	1.28894e-30	-11.502	0	G	+	1
14:75254310:A:T	BIOSQTL	BIOS_eQTL_geneLevel	ENSG00000119616	14	75254310	FCF1	A	2.45171e-05	4.21926	0.0152877	T	-	1
14:75254310:A:T	BIOSQTL	BIOS_eQTL_geneLevel	ENSG00000119630	14	75254310	PGF	A	8.17432e-13	-7.1582	0	T	+	1
14:75254310:A:T	BIOSQTL	BIOS_eQTL_geneLevel	ENSG00000119681	14	75254310	LTBP2	A	1.36945e-06	4.82944	0.0011643	T	-	1
14:75254310:A:T	BIOSQTL	BIOS_eQTL_geneLevel	ENSG00000119684	14	75254310	MLH3	A	2.20414e-09	-5.98184	6.0698e-06	T	+	1
14:75254310:A:T	BIOSQTL	BIOS_eQTL_geneLevel	ENSG00000119718	14	75254310	EIF2B2	A	1.36879e-28	-11.0922	0	T	+	1
14:75254310:A:T	BIOSQTL	BIOS_eQTL_geneLevel	ENSG00000119718	14	75254310	EIF2B2	A	1.63562e-07	-5.2365	9.35505e-05	T	+	1
14:75254310:A:T	BIOSQTL	BIOS_eQTL_geneLevel	ENSG00000198208	14	75254310	RPS6KL1	A	3.97881e-31	-11.6029	0	T	+	1
14:75255081:C:T	BIOSQTL	BIOS_eQTL_geneLevel	ENSG00000119616	14	75255081	FCF1	T	5.67819e-05	4.02597	0.032786	C	-	1
14:75255081:C:T	BIOSQTL	BIOS_eQTL_geneLevel	ENSG00000119630	14	75255081	PGF	T	1.81247e-12	-7.04814	0	C	+	1
14:75255081:C:T	BIOSQTL	BIOS_eQTL_geneLevel	ENSG00000119681	14	75255081	LTBP2	T	2.35613e-06	4.72025	0.00179693	C	-	1
14:75255081:C:T	BIOSQTL	BIOS_eQTL_geneLevel	ENSG00000119684	14	75255081	MLH3	T	4.18273e-09	-5.87664	5.98372e-06	C	+	1
14:75255081:C:T	BIOSQTL	BIOS_eQTL_geneLevel	ENSG00000119718	14	75255081	EIF2B2	T	3.24256e-28	-11.0147	0	C	+	1
14:75255081:C:T	BIOSQTL	BIOS_eQTL_geneLevel	ENSG00000119718	14	75255081	EIF2B2	T	7.16434e-08	-5.38699	6.1829e-05	C	+	1
14:75255081:C:T	BIOSQTL	BIOS_eQTL_geneLevel	ENSG00000198208	14	75255081	RPS6KL1	T	9.33603e-31	-11.5297	0	C	+	1
14:75255659:C:T	BIOSQTL	BIOS_eQTL_geneLevel	ENSG00000119616	14	75255659	FCF1	C	8.2782e-05	3.93635	0.0452875	T	-	1
14:75255659:C:T	BIOSQTL	BIOS_eQTL_geneLevel	ENSG00000119630	14	75255659	PGF	C	3.64252e-12	-6.95029	0	T	+	1
14:75255659:C:T	BIOSQTL	BIOS_eQTL_geneLevel	ENSG00000119681	14	75255659	LTBP2	C	8.36728e-07	4.92671	0.000742692	T	-	1
14:75255659:C:T	BIOSQTL	BIOS_eQTL_geneLevel	ENSG00000119684	14	75255659	MLH3	C	6.52944e-09	-5.80244	1.18603e-05	T	+	1
14:75255659:C:T	BIOSQTL	BIOS_eQTL_geneLevel	ENSG00000119718	14	75255659	EIF2B2	C	3.34592e-27	-10.8025	0	T	+	1
14:75255659:C:T	BIOSQTL	BIOS_eQTL_geneLevel	ENSG00000119718	14	75255659	EIF2B2	C	9.99581e-08	-5.32672	8.3626e-05	T	+	1
14:75255659:C:T	BIOSQTL	BIOS_eQTL_geneLevel	ENSG00000198208	14	75255659	RPS6KL1	C	5.2359e-30	-11.3803	0	T	+	1
14:75270635:C:T	BIOSQTL	BIOS_eQTL_geneLevel	ENSG00000119616	14	75270635	FCF1	T	4.15298e-05	4.09886	0.0247478	C	-	1
14:75270635:C:T	BIOSQTL	BIOS_eQTL_geneLevel	ENSG00000119630	14	75270635	PGF	T	5.42757e-14	-7.52113	0	C	+	1
14:75270635:C:T	BIOSQTL	BIOS_eQTL_geneLevel	ENSG00000119681	14	75270635	LTBP2	T	7.80425e-07	4.94024	0.000701699	C	-	1
14:75270635:C:T	BIOSQTL	BIOS_eQTL_geneLevel	ENSG00000119684	14	75270635	MLH3	T	7.44347e-09	-5.78043	1.18273e-05	C	+	1
14:75270635:C:T	BIOSQTL	BIOS_eQTL_geneLevel	ENSG00000119718	14	75270635	EIF2B2	T	5.08602e-29	-11.1804	0	C	+	1
14:75270635:C:T	BIOSQTL	BIOS_eQTL_geneLevel	ENSG00000119718	14	75270635	EIF2B2	T	1.43118e-07	-5.26109	8.84369e-05	C	+	1
14:75270635:C:T	BIOSQTL	BIOS_eQTL_geneLevel	ENSG00000198208	14	75270635	RPS6KL1	T	3.69544e-32	-11.8045	0	C	+	1
14:75272008:A:G	BIOSQTL	BIOS_eQTL_geneLevel	ENSG00000119616	14	75272008	FCF1	A	2.45171e-05	4.21926	0.0152877	G	-	1
14:75272008:A:G	BIOSQTL	BIOS_eQTL_geneLevel	ENSG00000119630	14	75272008	PGF	A	8.17432e-13	-7.1582	0	G	+	1
14:75272008:A:G	BIOSQTL	BIOS_eQTL_geneLevel	ENSG00000119681	14	75272008	LTBP2	A	1.472e-06	4.81516	0.00121344	G	-	1
14:75272008:A:G	BIOSQTL	BIOS_eQTL_geneLevel	ENSG00000119684	14	75272008	MLH3	A	2.20414e-09	-5.98184	6.0698e-06	G	+	1
14:75272008:A:G	BIOSQTL	BIOS_eQTL_geneLevel	ENSG00000119718	14	75272008	EIF2B2	A	1.36879e-28	-11.0922	0	G	+	1
14:75272008:A:G	BIOSQTL	BIOS_eQTL_geneLevel	ENSG00000119718	14	75272008	EIF2B2	A	1.63031e-07	-5.23703	9.35711e-05	G	+	1
14:75272008:A:G	BIOSQTL	BIOS_eQTL_geneLevel	ENSG00000198208	14	75272008	RPS6KL1	A	3.35427e-31	-11.6175	0	G	+	1
14:75272433:A:G	BIOSQTL	BIOS_eQTL_geneLevel	ENSG00000119616	14	75272433	FCF1	A	2.45171e-05	4.21926	0.0152877	G	-	1
14:75272433:A:G	BIOSQTL	BIOS_eQTL_geneLevel	ENSG00000119630	14	75272433	PGF	A	8.17432e-13	-7.1582	0	G	+	1
14:75272433:A:G	BIOSQTL	BIOS_eQTL_geneLevel	ENSG00000119684	14	75272433	MLH3	A	2.20414e-09	-5.98184	6.0698e-06	G	+	1
14:75272433:A:G	BIOSQTL	BIOS_eQTL_geneLevel	ENSG00000119718	14	75272433	EIF2B2	A	1.36879e-28	-11.0922	0	G	+	1
14:75272433:A:G	BIOSQTL	BIOS_eQTL_geneLevel	ENSG00000119718	14	75272433	EIF2B2	A	1.63031e-07	-5.23703	9.35711e-05	G	+	1
14:75272433:A:G	BIOSQTL	BIOS_eQTL_geneLevel	ENSG00000198208	14	75272433	RPS6KL1	A	3.35427e-31	-11.6175	0	G	+	1
14:75273113:A:C	BIOSQTL	BIOS_eQTL_geneLevel	ENSG00000119616	14	75273113	FCF1	C	2.45171e-05	4.21926	0.0152877	A	-	1
14:75273113:A:C	BIOSQTL	BIOS_eQTL_geneLevel	ENSG00000119630	14	75273113	PGF	C	8.17432e-13	-7.1582	0	A	+	1
14:75273113:A:C	BIOSQTL	BIOS_eQTL_geneLevel	ENSG00000119684	14	75273113	MLH3	C	2.20414e-09	-5.98184	6.0698e-06	A	+	1
14:75273113:A:C	BIOSQTL	BIOS_eQTL_geneLevel	ENSG00000119718	14	75273113	EIF2B2	C	1.36879e-28	-11.0922	0	A	+	1
14:75273113:A:C	BIOSQTL	BIOS_eQTL_geneLevel	ENSG00000119718	14	75273113	EIF2B2	C	1.63031e-07	-5.23703	9.35711e-05	A	+	1
14:75273113:A:C	BIOSQTL	BIOS_eQTL_geneLevel	ENSG00000198208	14	75273113	RPS6KL1	C	3.35427e-31	-11.6175	0	A	+	1
14:75274288:C:T	BIOSQTL	BIOS_eQTL_geneLevel	ENSG00000119616	14	75274288	FCF1	T	2.45171e-05	4.21926	0.0152877	C	-	1
14:75274288:C:T	BIOSQTL	BIOS_eQTL_geneLevel	ENSG00000119630	14	75274288	PGF	T	8.17432e-13	-7.1582	0	C	+	1
14:75274288:C:T	BIOSQTL	BIOS_eQTL_geneLevel	ENSG00000119684	14	75274288	MLH3	T	2.20414e-09	-5.98184	6.0698e-06	C	+	1
14:75274288:C:T	BIOSQTL	BIOS_eQTL_geneLevel	ENSG00000119718	14	75274288	EIF2B2	T	1.36879e-28	-11.0922	0	C	+	1
14:75274288:C:T	BIOSQTL	BIOS_eQTL_geneLevel	ENSG00000119718	14	75274288	EIF2B2	T	1.63031e-07	-5.23703	9.35711e-05	C	+	1
14:75274288:C:T	BIOSQTL	BIOS_eQTL_geneLevel	ENSG00000198208	14	75274288	RPS6KL1	T	3.35427e-31	-11.6175	0	C	+	1
14:75278181:A:C	BIOSQTL	BIOS_eQTL_geneLevel	ENSG00000119616	14	75278181	FCF1	A	3.9841e-05	4.10847	0.0239776	C	-	1
14:75278181:A:C	BIOSQTL	BIOS_eQTL_geneLevel	ENSG00000119630	14	75278181	PGF	A	3.14519e-14	-7.5921	0	C	+	1
14:75278181:A:C	BIOSQTL	BIOS_eQTL_geneLevel	ENSG00000119640	14	75278181	ACYP1	A	3.12998e-10	-6.29212	0	C	+	1
14:75278181:A:C	BIOSQTL	BIOS_eQTL_geneLevel	ENSG00000119684	14	75278181	MLH3	A	7.63158e-09	-5.77633	1.1821e-05	C	+	1
14:75278181:A:C	BIOSQTL	BIOS_eQTL_geneLevel	ENSG00000119718	14	75278181	EIF2B2	A	6.61875e-29	-11.1569	0	C	+	1
14:75278181:A:C	BIOSQTL	BIOS_eQTL_geneLevel	ENSG00000119718	14	75278181	EIF2B2	A	1.63562e-07	-5.23648	9.35505e-05	C	+	1
14:75278181:A:C	BIOSQTL	BIOS_eQTL_geneLevel	ENSG00000198208	14	75278181	RPS6KL1	A	8.5936e-32	-11.7334	0	C	+	1
14:75278302:A:G	BIOSQTL	BIOS_eQTL_geneLevel	ENSG00000119616	14	75278302	FCF1	G	2.61313e-05	4.20499	0.0161913	A	-	1
14:75278302:A:G	BIOSQTL	BIOS_eQTL_geneLevel	ENSG00000119630	14	75278302	PGF	G	8.17432e-13	-7.1582	0	A	+	1
14:75278302:A:G	BIOSQTL	BIOS_eQTL_geneLevel	ENSG00000119640	14	75278302	ACYP1	G	2.86709e-10	-6.30576	0	A	+	1
14:75278302:A:G	BIOSQTL	BIOS_eQTL_geneLevel	ENSG00000119684	14	75278302	MLH3	G	2.20414e-09	-5.98184	6.0698e-06	A	+	1
14:75278302:A:G	BIOSQTL	BIOS_eQTL_geneLevel	ENSG00000119718	14	75278302	EIF2B2	G	1.36879e-28	-11.0922	0	A	+	1
14:75278302:A:G	BIOSQTL	BIOS_eQTL_geneLevel	ENSG00000119718	14	75278302	EIF2B2	G	1.63031e-07	-5.23703	9.35711e-05	A	+	1
14:75278302:A:G	BIOSQTL	BIOS_eQTL_geneLevel	ENSG00000198208	14	75278302	RPS6KL1	G	3.35427e-31	-11.6175	0	A	+	1
14:75279395:A:T	BIOSQTL	BIOS_eQTL_geneLevel	ENSG00000119616	14	75279395	FCF1	T	2.65973e-05	4.20096	0.0164512	A	-	1
14:75279395:A:T	BIOSQTL	BIOS_eQTL_geneLevel	ENSG00000119630	14	75279395	PGF	T	7.68832e-13	-7.16655	0	A	+	1
14:75279395:A:T	BIOSQTL	BIOS_eQTL_geneLevel	ENSG00000119640	14	75279395	ACYP1	T	3.22411e-10	-6.28747	0	A	+	1
14:75279395:A:T	BIOSQTL	BIOS_eQTL_geneLevel	ENSG00000119684	14	75279395	MLH3	T	2.47043e-09	-5.96323	6.05657e-06	A	+	1
14:75279395:A:T	BIOSQTL	BIOS_eQTL_geneLevel	ENSG00000119718	14	75279395	EIF2B2	T	1.30599e-28	-11.0963	0	A	+	1
14:75279395:A:T	BIOSQTL	BIOS_eQTL_geneLevel	ENSG00000119718	14	75279395	EIF2B2	T	1.47703e-07	-5.25535	8.83441e-05	A	+	1
14:75279395:A:T	BIOSQTL	BIOS_eQTL_geneLevel	ENSG00000198208	14	75279395	RPS6KL1	T	4.76292e-31	-11.5874	0	A	+	1
14:75286426:C:T	BIOSQTL	BIOS_eQTL_geneLevel	ENSG00000119616	14	75286426	FCF1	T	2.95379e-05	4.1771	0.0181031	C	-	1
14:75286426:C:T	BIOSQTL	BIOS_eQTL_geneLevel	ENSG00000119630	14	75286426	PGF	T	1.28049e-12	-7.09638	0	C	+	1
14:75286426:C:T	BIOSQTL	BIOS_eQTL_geneLevel	ENSG00000119640	14	75286426	ACYP1	T	2.10881e-10	-6.35315	0	C	+	1
14:75286426:C:T	BIOSQTL	BIOS_eQTL_geneLevel	ENSG00000119684	14	75286426	MLH3	T	3.2155e-09	-5.92018	6.02301e-06	C	+	1
14:75286426:C:T	BIOSQTL	BIOS_eQTL_geneLevel	ENSG00000119718	14	75286426	EIF2B2	T	2.62533e-28	-11.0336	0	C	+	1
14:75286426:C:T	BIOSQTL	BIOS_eQTL_geneLevel	ENSG00000119718	14	75286426	EIF2B2	T	1.86011e-07	-5.21261	0.000120647	C	+	1
14:75286426:C:T	BIOSQTL	BIOS_eQTL_geneLevel	ENSG00000198208	14	75286426	RPS6KL1	T	1.98837e-31	-11.662	0	C	+	1
14:75286705:C:T	BIOSQTL	BIOS_eQTL_geneLevel	ENSG00000119616	14	75286705	FCF1	T	2.96159e-05	4.17641	0.0181486	C	-	1
14:75286705:C:T	BIOSQTL	BIOS_eQTL_geneLevel	ENSG00000119630	14	75286705	PGF	T	9.06534e-13	-7.14383	0	C	+	1
14:75286705:C:T	BIOSQTL	BIOS_eQTL_geneLevel	ENSG00000119640	14	75286705	ACYP1	T	3.06608e-10	-6.29535	0	C	+	1
14:75286705:C:T	BIOSQTL	BIOS_eQTL_geneLevel	ENSG00000119684	14	75286705	MLH3	T	2.26171e-09	-5.97778	6.06612e-06	C	+	1
14:75286705:C:T	BIOSQTL	BIOS_eQTL_geneLevel	ENSG00000119718	14	75286705	EIF2B2	T	1.15991e-28	-11.1069	0	C	+	1
14:75286705:C:T	BIOSQTL	BIOS_eQTL_geneLevel	ENSG00000119718	14	75286705	EIF2B2	T	1.5144e-07	-5.25075	8.82661e-05	C	+	1
14:75286705:C:T	BIOSQTL	BIOS_eQTL_geneLevel	ENSG00000198208	14	75286705	RPS6KL1	T	3.3386e-31	-11.6179	0	C	+	1
14:75288518:A:G	BIOSQTL	BIOS_eQTL_geneLevel	ENSG00000119616	14	75288518	FCF1	A	2.61313e-05	4.20499	0.0161913	G	-	1
14:75288518:A:G	BIOSQTL	BIOS_eQTL_geneLevel	ENSG00000119630	14	75288518	PGF	A	8.17432e-13	-7.1582	0	G	+	1
14:75288518:A:G	BIOSQTL	BIOS_eQTL_geneLevel	ENSG00000119640	14	75288518	ACYP1	A	2.86709e-10	-6.30576	0	G	+	1
14:75288518:A:G	BIOSQTL	BIOS_eQTL_geneLevel	ENSG00000119684	14	75288518	MLH3	A	2.20414e-09	-5.98184	6.0698e-06	G	+	1
14:75288518:A:G	BIOSQTL	BIOS_eQTL_geneLevel	ENSG00000119718	14	75288518	EIF2B2	A	1.15991e-28	-11.1069	0	G	+	1
14:75288518:A:G	BIOSQTL	BIOS_eQTL_geneLevel	ENSG00000119718	14	75288518	EIF2B2	A	1.50947e-07	-5.25128	8.8271e-05	G	+	1
14:75288518:A:G	BIOSQTL	BIOS_eQTL_geneLevel	ENSG00000198208	14	75288518	RPS6KL1	A	3.35427e-31	-11.6175	0	G	+	1
14:75291900:C:T	BIOSQTL	BIOS_eQTL_geneLevel	ENSG00000119616	14	75291900	FCF1	C	2.61313e-05	4.20499	0.0161913	T	-	1
14:75291900:C:T	BIOSQTL	BIOS_eQTL_geneLevel	ENSG00000119630	14	75291900	PGF	C	8.17432e-13	-7.1582	0	T	+	1
14:75291900:C:T	BIOSQTL	BIOS_eQTL_geneLevel	ENSG00000119640	14	75291900	ACYP1	C	2.86709e-10	-6.30576	0	T	+	1
14:75291900:C:T	BIOSQTL	BIOS_eQTL_geneLevel	ENSG00000119684	14	75291900	MLH3	C	2.20414e-09	-5.98184	6.0698e-06	T	+	1
14:75291900:C:T	BIOSQTL	BIOS_eQTL_geneLevel	ENSG00000119718	14	75291900	EIF2B2	C	1.15991e-28	-11.1069	0	T	+	1
14:75291900:C:T	BIOSQTL	BIOS_eQTL_geneLevel	ENSG00000119718	14	75291900	EIF2B2	C	1.50947e-07	-5.25128	8.8271e-05	T	+	1
14:75291900:C:T	BIOSQTL	BIOS_eQTL_geneLevel	ENSG00000198208	14	75291900	RPS6KL1	C	3.35427e-31	-11.6175	0	T	+	1
14:75301617:C:G	BIOSQTL	BIOS_eQTL_geneLevel	ENSG00000119616	14	75301617	FCF1	C	2.61313e-05	4.20499	0.0161913	G	-	1
14:75301617:C:G	BIOSQTL	BIOS_eQTL_geneLevel	ENSG00000119630	14	75301617	PGF	C	8.17432e-13	-7.1582	0	G	+	1
14:75301617:C:G	BIOSQTL	BIOS_eQTL_geneLevel	ENSG00000119640	14	75301617	ACYP1	C	2.86709e-10	-6.30576	0	G	+	1
14:75301617:C:G	BIOSQTL	BIOS_eQTL_geneLevel	ENSG00000119684	14	75301617	MLH3	C	2.20414e-09	-5.98184	6.0698e-06	G	+	1
14:75301617:C:G	BIOSQTL	BIOS_eQTL_geneLevel	ENSG00000119718	14	75301617	EIF2B2	C	1.15991e-28	-11.1069	0	G	+	1
14:75301617:C:G	BIOSQTL	BIOS_eQTL_geneLevel	ENSG00000119718	14	75301617	EIF2B2	C	1.50947e-07	-5.25128	8.8271e-05	G	+	1
14:75301617:C:G	BIOSQTL	BIOS_eQTL_geneLevel	ENSG00000198208	14	75301617	RPS6KL1	C	3.35427e-31	-11.6175	0	G	+	1
14:75307588:A:G	BIOSQTL	BIOS_eQTL_geneLevel	ENSG00000119616	14	75307588	FCF1	G	1.38516e-05	4.34629	0.00922186	G	+	1
14:75307588:A:G	BIOSQTL	BIOS_eQTL_geneLevel	ENSG00000119630	14	75307588	PGF	G	5.85572e-13	-7.20369	0	G	-	1
14:75307588:A:G	BIOSQTL	BIOS_eQTL_geneLevel	ENSG00000119640	14	75307588	ACYP1	G	2.51924e-10	-6.32562	0	G	-	1
14:75307588:A:G	BIOSQTL	BIOS_eQTL_geneLevel	ENSG00000119684	14	75307588	MLH3	G	1.04881e-09	-6.10176	6.16903e-06	G	-	1
14:75307588:A:G	BIOSQTL	BIOS_eQTL_geneLevel	ENSG00000119718	14	75307588	EIF2B2	G	1.54094e-28	-11.0815	0	G	-	1
14:75307588:A:G	BIOSQTL	BIOS_eQTL_geneLevel	ENSG00000119718	14	75307588	EIF2B2	G	2.01011e-07	-5.19822	0.000131356	G	-	1
14:75307588:A:G	BIOSQTL	BIOS_eQTL_geneLevel	ENSG00000198208	14	75307588	RPS6KL1	G	2.08401e-31	-11.6581	0	G	-	1
14:75307600:A:G	BIOSQTL	BIOS_eQTL_geneLevel	ENSG00000119616	14	75307600	FCF1	A	2.61313e-05	4.20499	0.0161913	A	+	1
14:75307600:A:G	BIOSQTL	BIOS_eQTL_geneLevel	ENSG00000119630	14	75307600	PGF	A	8.80513e-13	-7.14794	0	A	-	1
14:75307600:A:G	BIOSQTL	BIOS_eQTL_geneLevel	ENSG00000119640	14	75307600	ACYP1	A	2.86709e-10	-6.30576	0	A	-	1
14:75307600:A:G	BIOSQTL	BIOS_eQTL_geneLevel	ENSG00000119684	14	75307600	MLH3	A	2.3465e-09	-5.9716	6.06281e-06	A	-	1
14:75307600:A:G	BIOSQTL	BIOS_eQTL_geneLevel	ENSG00000119718	14	75307600	EIF2B2	A	9.82691e-29	-11.1218	0	A	-	1
14:75307600:A:G	BIOSQTL	BIOS_eQTL_geneLevel	ENSG00000119718	14	75307600	EIF2B2	A	1.63208e-07	-5.23694	9.3566e-05	A	-	1
14:75307600:A:G	BIOSQTL	BIOS_eQTL_geneLevel	ENSG00000198208	14	75307600	RPS6KL1	A	3.51499e-31	-11.6134	0	A	-	1
14:75310812:C:G	BIOSQTL	BIOS_eQTL_geneLevel	ENSG00000119640	14	75310812	ACYP1	G	2.40431e-05	-4.22351	0.0150663	C	+	1
14:75310812:C:G	BIOSQTL	BIOS_eQTL_geneLevel	ENSG00000119684	14	75310812	MLH3	G	9.31035e-06	-4.43241	0.0063628	C	+	1
14:75310812:C:G	BIOSQTL	BIOS_eQTL_geneLevel	ENSG00000119718	14	75310812	EIF2B2	G	1.18764e-12	-7.10679	0	C	+	1
14:75310812:C:G	BIOSQTL	BIOS_eQTL_geneLevel	ENSG00000198208	14	75310812	RPS6KL1	G	2.21832e-43	-13.8099	0	C	+	1
14:75321714:C:T	BIOSQTL	BIOS_eQTL_geneLevel	ENSG00000119616	14	75321714	FCF1	C	4.5503e-05	4.07774	0.0267956	C	+	1
14:75321714:C:T	BIOSQTL	BIOS_eQTL_geneLevel	ENSG00000119630	14	75321714	PGF	C	1.59005e-12	-7.06634	0	C	-	1
14:75321714:C:T	BIOSQTL	BIOS_eQTL_geneLevel	ENSG00000119638	14	75321714	NEK9	C	3.38925e-05	-4.14552	0.0205174	C	-	1
14:75321714:C:T	BIOSQTL	BIOS_eQTL_geneLevel	ENSG00000119640	14	75321714	ACYP1	C	2.30064e-10	-6.33963	0	C	-	1
14:75321714:C:T	BIOSQTL	BIOS_eQTL_geneLevel	ENSG00000119684	14	75321714	MLH3	C	1.96832e-09	-6.00033	6.08458e-06	C	-	1
14:75321714:C:T	BIOSQTL	BIOS_eQTL_geneLevel	ENSG00000119718	14	75321714	EIF2B2	C	2.92718e-30	-11.4309	0	C	-	1
14:75321714:C:T	BIOSQTL	BIOS_eQTL_geneLevel	ENSG00000119718	14	75321714	EIF2B2	C	6.96002e-08	-5.39209	6.18707e-05	C	-	1
14:75321714:C:T	BIOSQTL	BIOS_eQTL_geneLevel	ENSG00000198208	14	75321714	RPS6KL1	C	1.26819e-30	-11.5033	0	C	-	1
14:75324780:A:G	BIOSQTL	BIOS_eQTL_geneLevel	ENSG00000119616	14	75324780	FCF1	G	4.75406e-05	4.06748	0.0278139	G	+	1
14:75324780:A:G	BIOSQTL	BIOS_eQTL_geneLevel	ENSG00000119630	14	75324780	PGF	G	1.75605e-12	-7.05256	0	G	-	1
14:75324780:A:G	BIOSQTL	BIOS_eQTL_geneLevel	ENSG00000119638	14	75324780	NEK9	G	3.38925e-05	-4.14552	0.0205174	G	-	1
14:75324780:A:G	BIOSQTL	BIOS_eQTL_geneLevel	ENSG00000119640	14	75324780	ACYP1	G	2.15876e-10	-6.34943	0	G	-	1
14:75324780:A:G	BIOSQTL	BIOS_eQTL_geneLevel	ENSG00000119684	14	75324780	MLH3	G	1.96832e-09	-6.00033	6.08458e-06	G	-	1
14:75324780:A:G	BIOSQTL	BIOS_eQTL_geneLevel	ENSG00000119718	14	75324780	EIF2B2	G	2.47958e-30	-11.4452	0	G	-	1
14:75324780:A:G	BIOSQTL	BIOS_eQTL_geneLevel	ENSG00000119718	14	75324780	EIF2B2	G	5.95324e-08	-5.42011	5.08015e-05	G	-	1
14:75324780:A:G	BIOSQTL	BIOS_eQTL_geneLevel	ENSG00000198208	14	75324780	RPS6KL1	G	1.32836e-30	-11.4992	0	G	-	1
14:75326771:C:T	BIOSQTL	BIOS_eQTL_geneLevel	ENSG00000119640	14	75326771	ACYP1	T	1.01572e-05	-4.41378	0.00698914	T	-	1
14:75326771:C:T	BIOSQTL	BIOS_eQTL_geneLevel	ENSG00000119684	14	75326771	MLH3	T	3.95659e-05	-4.10996	0.0238258	T	-	1
14:75326771:C:T	BIOSQTL	BIOS_eQTL_geneLevel	ENSG00000119718	14	75326771	EIF2B2	T	8.03345e-05	-3.94331	0.0441525	T	-	1
14:75326771:C:T	BIOSQTL	BIOS_eQTL_geneLevel	ENSG00000119718	14	75326771	EIF2B2	T	5.52255e-15	-7.81437	0	T	-	1
14:75326771:C:T	BIOSQTL	BIOS_eQTL_geneLevel	ENSG00000198208	14	75326771	RPS6KL1	T	7.0915e-47	-14.3782	0	T	-	1
14:75327443:C:T	BIOSQTL	BIOS_eQTL_geneLevel	ENSG00000119640	14	75327443	ACYP1	C	1.08151e-05	-4.40011	0.00736837	C	-	1
14:75327443:C:T	BIOSQTL	BIOS_eQTL_geneLevel	ENSG00000119684	14	75327443	MLH3	C	3.72996e-05	-4.1236	0.0225082	C	-	1
14:75327443:C:T	BIOSQTL	BIOS_eQTL_geneLevel	ENSG00000119718	14	75327443	EIF2B2	C	8.01337e-05	-3.94398	0.0440616	C	-	1
14:75327443:C:T	BIOSQTL	BIOS_eQTL_geneLevel	ENSG00000119718	14	75327443	EIF2B2	C	5.52255e-15	-7.81437	0	C	-	1
14:75327443:C:T	BIOSQTL	BIOS_eQTL_geneLevel	ENSG00000198208	14	75327443	RPS6KL1	C	8.75582e-47	-14.3635	0	C	-	1
14:75330697:C:T	BIOSQTL	BIOS_eQTL_geneLevel	ENSG00000119616	14	75330697	FCF1	T	5.71208e-05	4.02445	0.0329423	T	+	1
14:75330697:C:T	BIOSQTL	BIOS_eQTL_geneLevel	ENSG00000119630	14	75330697	PGF	T	1.41658e-11	-6.75615	0	T	-	1
14:75330697:C:T	BIOSQTL	BIOS_eQTL_geneLevel	ENSG00000119640	14	75330697	ACYP1	T	1.38856e-09	-6.05677	6.13346e-06	T	-	1
14:75330697:C:T	BIOSQTL	BIOS_eQTL_geneLevel	ENSG00000119684	14	75330697	MLH3	T	1.48024e-07	-5.25486	8.83441e-05	T	-	1
14:75330697:C:T	BIOSQTL	BIOS_eQTL_geneLevel	ENSG00000119718	14	75330697	EIF2B2	T	1.52488e-29	-11.2868	0	T	-	1
14:75330697:C:T	BIOSQTL	BIOS_eQTL_geneLevel	ENSG00000119718	14	75330697	EIF2B2	T	4.35048e-08	-5.476	4.55192e-05	T	-	1
14:75330697:C:T	BIOSQTL	BIOS_eQTL_geneLevel	ENSG00000198208	14	75330697	RPS6KL1	T	1.61894e-34	-12.2529	0	T	-	1
14:75332274:A:G	BIOSQTL	BIOS_eQTL_geneLevel	ENSG00000119630	14	75332274	PGF	A	4.21636e-10	-6.24564	0	A	-	1
14:75332274:A:G	BIOSQTL	BIOS_eQTL_geneLevel	ENSG00000119640	14	75332274	ACYP1	A	7.25614e-10	-6.16036	0	A	-	1
14:75332274:A:G	BIOSQTL	BIOS_eQTL_geneLevel	ENSG00000119684	14	75332274	MLH3	A	1.7344e-08	-5.63642	2.90293e-05	A	-	1
14:75332274:A:G	BIOSQTL	BIOS_eQTL_geneLevel	ENSG00000119718	14	75332274	EIF2B2	A	9.12588e-29	-11.1283	0	A	-	1
14:75332274:A:G	BIOSQTL	BIOS_eQTL_geneLevel	ENSG00000119718	14	75332274	EIF2B2	A	8.67953e-08	-5.35238	6.71366e-05	A	-	1
14:75332274:A:G	BIOSQTL	BIOS_eQTL_geneLevel	ENSG00000198208	14	75332274	RPS6KL1	A	1.00198e-31	-11.7203	0	A	-	1
14:75332403:A:G	BIOSQTL	BIOS_eQTL_geneLevel	ENSG00000119616	14	75332403	FCF1	A	6.19126e-05	4.00546	0.0353602	A	+	1
14:75332403:A:G	BIOSQTL	BIOS_eQTL_geneLevel	ENSG00000119630	14	75332403	PGF	A	9.58504e-12	-6.81242	0	A	-	1
14:75332403:A:G	BIOSQTL	BIOS_eQTL_geneLevel	ENSG00000119638	14	75332403	NEK9	A	8.76713e-05	-3.92233	0.0476447	A	-	1
14:75332403:A:G	BIOSQTL	BIOS_eQTL_geneLevel	ENSG00000119640	14	75332403	ACYP1	A	1.35615e-09	-6.06041	6.13874e-06	A	-	1
14:75332403:A:G	BIOSQTL	BIOS_eQTL_geneLevel	ENSG00000119684	14	75332403	MLH3	A	1.17592e-07	-5.29713	8.33611e-05	A	-	1
14:75332403:A:G	BIOSQTL	BIOS_eQTL_geneLevel	ENSG00000119718	14	75332403	EIF2B2	A	2.34233e-29	-11.2488	0	A	-	1
14:75332403:A:G	BIOSQTL	BIOS_eQTL_geneLevel	ENSG00000119718	14	75332403	EIF2B2	A	4.99186e-08	-5.45156	4.53643e-05	A	-	1
14:75332403:A:G	BIOSQTL	BIOS_eQTL_geneLevel	ENSG00000198208	14	75332403	RPS6KL1	A	6.65925e-34	-12.1376	0	A	-	1
14:75338408:A:G	BIOSQTL	BIOS_eQTL_geneLevel	ENSG00000119616	14	75338408	FCF1	A	8.19584e-05	3.93871	0.0448932	A	+	1
14:75338408:A:G	BIOSQTL	BIOS_eQTL_geneLevel	ENSG00000119630	14	75338408	PGF	A	1.16718e-12	-7.10905	0	A	-	1
14:75338408:A:G	BIOSQTL	BIOS_eQTL_geneLevel	ENSG00000119638	14	75338408	NEK9	A	3.84503e-05	-4.11646	0.0231317	A	-	1
14:75338408:A:G	BIOSQTL	BIOS_eQTL_geneLevel	ENSG00000119640	14	75338408	ACYP1	A	2.856e-10	-6.30621	0	A	-	1
14:75338408:A:G	BIOSQTL	BIOS_eQTL_geneLevel	ENSG00000119684	14	75338408	MLH3	A	2.09583e-09	-5.99014	6.07497e-06	A	-	1
14:75338408:A:G	BIOSQTL	BIOS_eQTL_geneLevel	ENSG00000119718	14	75338408	EIF2B2	A	1.50184e-30	-11.4887	0	A	-	1
14:75338408:A:G	BIOSQTL	BIOS_eQTL_geneLevel	ENSG00000119718	14	75338408	EIF2B2	A	5.08821e-08	-5.44811	4.53438e-05	A	-	1
14:75338408:A:G	BIOSQTL	BIOS_eQTL_geneLevel	ENSG00000198208	14	75338408	RPS6KL1	A	4.04445e-31	-11.6014	0	A	-	1
14:75339450:A:G	BIOSQTL	BIOS_eQTL_geneLevel	ENSG00000119616	14	75339450	FCF1	G	8.19584e-05	3.93871	0.0448932	G	+	1
14:75339450:A:G	BIOSQTL	BIOS_eQTL_geneLevel	ENSG00000119630	14	75339450	PGF	G	9.46986e-13	-7.13785	0	G	-	1
14:75339450:A:G	BIOSQTL	BIOS_eQTL_geneLevel	ENSG00000119638	14	75339450	NEK9	G	3.84503e-05	-4.11646	0.0231317	G	-	1
14:75339450:A:G	BIOSQTL	BIOS_eQTL_geneLevel	ENSG00000119640	14	75339450	ACYP1	G	2.856e-10	-6.30621	0	G	-	1
14:75339450:A:G	BIOSQTL	BIOS_eQTL_geneLevel	ENSG00000119684	14	75339450	MLH3	G	1.91804e-09	-6.00444	6.08791e-06	G	-	1
14:75339450:A:G	BIOSQTL	BIOS_eQTL_geneLevel	ENSG00000119718	14	75339450	EIF2B2	G	1.27114e-30	-11.503	0	G	-	1
14:75339450:A:G	BIOSQTL	BIOS_eQTL_geneLevel	ENSG00000119718	14	75339450	EIF2B2	G	4.6974e-08	-5.46239	4.54313e-05	G	-	1
14:75339450:A:G	BIOSQTL	BIOS_eQTL_geneLevel	ENSG00000198208	14	75339450	RPS6KL1	G	4.04445e-31	-11.6014	0	G	-	1
14:75342954:C:T	BIOSQTL	BIOS_eQTL_geneLevel	ENSG00000119616	14	75342954	FCF1	T	5.09556e-05	4.05136	0.0295985	T	+	1
14:75342954:C:T	BIOSQTL	BIOS_eQTL_geneLevel	ENSG00000119630	14	75342954	PGF	T	9.89209e-13	-7.13183	0	T	-	1
14:75342954:C:T	BIOSQTL	BIOS_eQTL_geneLevel	ENSG00000119638	14	75342954	NEK9	T	4.89049e-05	-4.06078	0.0285798	T	-	1
14:75342954:C:T	BIOSQTL	BIOS_eQTL_geneLevel	ENSG00000119640	14	75342954	ACYP1	T	2.71212e-10	-6.31438	0	T	-	1
14:75342954:C:T	BIOSQTL	BIOS_eQTL_geneLevel	ENSG00000119684	14	75342954	MLH3	T	1.52215e-09	-6.04198	6.11995e-06	T	-	1
14:75342954:C:T	BIOSQTL	BIOS_eQTL_geneLevel	ENSG00000119718	14	75342954	EIF2B2	T	1.34552e-31	-11.6953	0	T	-	1
14:75342954:C:T	BIOSQTL	BIOS_eQTL_geneLevel	ENSG00000119718	14	75342954	EIF2B2	T	2.73509e-08	-5.55742	4.02322e-05	T	-	1
14:75342954:C:T	BIOSQTL	BIOS_eQTL_geneLevel	ENSG00000198208	14	75342954	RPS6KL1	T	5.77415e-32	-11.7669	0	T	-	1
14:75343877:C:T	BIOSQTL	BIOS_eQTL_geneLevel	ENSG00000119616	14	75343877	FCF1	T	5.41391e-05	4.03706	0.0312777	T	+	1
14:75343877:C:T	BIOSQTL	BIOS_eQTL_geneLevel	ENSG00000119630	14	75343877	PGF	T	8.90832e-13	-7.14627	0	T	-	1
14:75343877:C:T	BIOSQTL	BIOS_eQTL_geneLevel	ENSG00000119638	14	75343877	NEK9	T	5.19669e-05	-4.0464	0.0301418	T	-	1
14:75343877:C:T	BIOSQTL	BIOS_eQTL_geneLevel	ENSG00000119640	14	75343877	ACYP1	T	2.78315e-10	-6.31035	0	T	-	1
14:75343877:C:T	BIOSQTL	BIOS_eQTL_geneLevel	ENSG00000119684	14	75343877	MLH3	T	1.48302e-09	-6.04616	6.12407e-06	T	-	1
14:75343877:C:T	BIOSQTL	BIOS_eQTL_geneLevel	ENSG00000119718	14	75343877	EIF2B2	T	1.13013e-31	-11.7102	0	T	-	1
14:75343877:C:T	BIOSQTL	BIOS_eQTL_geneLevel	ENSG00000119718	14	75343877	EIF2B2	T	2.52121e-08	-5.5717	3.45443e-05	T	-	1
14:75343877:C:T	BIOSQTL	BIOS_eQTL_geneLevel	ENSG00000198208	14	75343877	RPS6KL1	T	5.80159e-32	-11.7666	0	T	-	1
14:75347937:A:C	BIOSQTL	BIOS_eQTL_geneLevel	ENSG00000119616	14	75347937	FCF1	C	6.49679e-05	3.99412	0.0368307	C	+	1
14:75347937:A:C	BIOSQTL	BIOS_eQTL_geneLevel	ENSG00000119630	14	75347937	PGF	C	4.75232e-13	-7.23219	0	C	-	1
14:75347937:A:C	BIOSQTL	BIOS_eQTL_geneLevel	ENSG00000119638	14	75347937	NEK9	C	4.89468e-05	-4.06043	0.028628	C	-	1
14:75347937:A:C	BIOSQTL	BIOS_eQTL_geneLevel	ENSG00000119640	14	75347937	ACYP1	C	2.31862e-10	-6.33846	0	C	-	1
14:75347937:A:C	BIOSQTL	BIOS_eQTL_geneLevel	ENSG00000119684	14	75347937	MLH3	C	1.48302e-09	-6.0461	6.12407e-06	C	-	1
14:75347937:A:C	BIOSQTL	BIOS_eQTL_geneLevel	ENSG00000119718	14	75347937	EIF2B2	C	6.75131e-32	-11.7538	0	C	-	1
14:75347937:A:C	BIOSQTL	BIOS_eQTL_geneLevel	ENSG00000119718	14	75347937	EIF2B2	C	1.97474e-08	-5.61402	3.47383e-05	C	-	1
14:75347937:A:C	BIOSQTL	BIOS_eQTL_geneLevel	ENSG00000198208	14	75347937	RPS6KL1	C	4.89093e-32	-11.781	0	C	-	1
14:75351487:A:G	BIOSQTL	BIOS_eQTL_geneLevel	ENSG00000119616	14	75351487	FCF1	G	6.89733e-05	3.97983	0.0387847	G	+	1
14:75351487:A:G	BIOSQTL	BIOS_eQTL_geneLevel	ENSG00000119630	14	75351487	PGF	G	4.26733e-13	-7.24664	0	G	-	1
14:75351487:A:G	BIOSQTL	BIOS_eQTL_geneLevel	ENSG00000119638	14	75351487	NEK9	G	5.20558e-05	-4.04607	0.0302144	G	-	1
14:75351487:A:G	BIOSQTL	BIOS_eQTL_geneLevel	ENSG00000119640	14	75351487	ACYP1	G	2.25919e-10	-6.34249	0	G	-	1
14:75351487:A:G	BIOSQTL	BIOS_eQTL_geneLevel	ENSG00000119684	14	75351487	MLH3	G	1.48302e-09	-6.0461	6.12407e-06	G	-	1
14:75351487:A:G	BIOSQTL	BIOS_eQTL_geneLevel	ENSG00000119718	14	75351487	EIF2B2	G	5.94072e-32	-11.7644	0	G	-	1
14:75351487:A:G	BIOSQTL	BIOS_eQTL_geneLevel	ENSG00000119718	14	75351487	EIF2B2	G	1.86802e-08	-5.62367	3.47745e-05	G	-	1
14:75351487:A:G	BIOSQTL	BIOS_eQTL_geneLevel	ENSG00000198208	14	75351487	RPS6KL1	G	3.9124e-32	-11.7998	0	G	-	1
14:75351647:A:G	BIOSQTL	BIOS_eQTL_geneLevel	ENSG00000119616	14	75351647	FCF1	A	6.89733e-05	3.97983	0.0387847	A	+	1
14:75351647:A:G	BIOSQTL	BIOS_eQTL_geneLevel	ENSG00000119630	14	75351647	PGF	A	4.26733e-13	-7.24664	0	A	-	1
14:75351647:A:G	BIOSQTL	BIOS_eQTL_geneLevel	ENSG00000119638	14	75351647	NEK9	A	5.11739e-05	-4.05005	0.0297567	A	-	1
14:75351647:A:G	BIOSQTL	BIOS_eQTL_geneLevel	ENSG00000119640	14	75351647	ACYP1	A	2.25919e-10	-6.34249	0	A	-	1
14:75351647:A:G	BIOSQTL	BIOS_eQTL_geneLevel	ENSG00000119684	14	75351647	MLH3	A	1.48302e-09	-6.0461	6.12407e-06	A	-	1
14:75351647:A:G	BIOSQTL	BIOS_eQTL_geneLevel	ENSG00000119718	14	75351647	EIF2B2	A	5.94072e-32	-11.7644	0	A	-	1
14:75351647:A:G	BIOSQTL	BIOS_eQTL_geneLevel	ENSG00000119718	14	75351647	EIF2B2	A	1.86802e-08	-5.62367	3.47745e-05	A	-	1
14:75351647:A:G	BIOSQTL	BIOS_eQTL_geneLevel	ENSG00000198208	14	75351647	RPS6KL1	A	3.9124e-32	-11.7998	0	A	-	1
14:75352555:C:T	BIOSQTL	BIOS_eQTL_geneLevel	ENSG00000119616	14	75352555	FCF1	C	6.89733e-05	3.97983	0.0387847	C	+	1
14:75352555:C:T	BIOSQTL	BIOS_eQTL_geneLevel	ENSG00000119630	14	75352555	PGF	C	4.26733e-13	-7.24664	0	C	-	1
14:75352555:C:T	BIOSQTL	BIOS_eQTL_geneLevel	ENSG00000119638	14	75352555	NEK9	C	5.11739e-05	-4.05005	0.0297567	C	-	1
14:75352555:C:T	BIOSQTL	BIOS_eQTL_geneLevel	ENSG00000119640	14	75352555	ACYP1	C	2.20125e-10	-6.34653	0	C	-	1
14:75352555:C:T	BIOSQTL	BIOS_eQTL_geneLevel	ENSG00000119684	14	75352555	MLH3	C	1.48302e-09	-6.0461	6.12407e-06	C	-	1
14:75352555:C:T	BIOSQTL	BIOS_eQTL_geneLevel	ENSG00000119718	14	75352555	EIF2B2	C	6.24378e-32	-11.7603	0	C	-	1
14:75352555:C:T	BIOSQTL	BIOS_eQTL_geneLevel	ENSG00000119718	14	75352555	EIF2B2	C	2.02327e-08	-5.60992	3.47162e-05	C	-	1
14:75352555:C:T	BIOSQTL	BIOS_eQTL_geneLevel	ENSG00000198208	14	75352555	RPS6KL1	C	4.6642e-32	-11.7848	0	C	-	1
14:75358817:C:G	BIOSQTL	BIOS_eQTL_geneLevel	ENSG00000119616	14	75358817	FCF1	G	7.77603e-05	3.95126	0.0427901	G	+	1
14:75358817:C:G	BIOSQTL	BIOS_eQTL_geneLevel	ENSG00000119630	14	75358817	PGF	G	2.88624e-13	-7.29959	0	G	-	1
14:75358817:C:G	BIOSQTL	BIOS_eQTL_geneLevel	ENSG00000119638	14	75358817	NEK9	G	4.73371e-05	-4.06823	0.0277189	G	-	1
14:75358817:C:G	BIOSQTL	BIOS_eQTL_geneLevel	ENSG00000119640	14	75358817	ACYP1	G	1.90265e-10	-6.36885	0	G	-	1
14:75358817:C:G	BIOSQTL	BIOS_eQTL_geneLevel	ENSG00000119684	14	75358817	MLH3	G	1.48302e-09	-6.0461	6.12407e-06	G	-	1
14:75358817:C:G	BIOSQTL	BIOS_eQTL_geneLevel	ENSG00000119718	14	75358817	EIF2B2	G	6.0976e-32	-11.7623	0	G	-	1
14:75358817:C:G	BIOSQTL	BIOS_eQTL_geneLevel	ENSG00000119718	14	75358817	EIF2B2	G	1.8465e-08	-5.62566	3.47846e-05	G	-	1
14:75358817:C:G	BIOSQTL	BIOS_eQTL_geneLevel	ENSG00000198208	14	75358817	RPS6KL1	G	3.55748e-32	-11.8077	0	G	-	1
14:75359229:C:T	BIOSQTL	BIOS_eQTL_geneLevel	ENSG00000119630	14	75359229	PGF	C	2.57532e-10	-6.32229	0	NA	NA	1
14:75359229:C:T	BIOSQTL	BIOS_eQTL_geneLevel	ENSG00000119640	14	75359229	ACYP1	C	1.72096e-07	-5.227	9.89011e-05	NA	NA	1
14:75359229:C:T	BIOSQTL	BIOS_eQTL_geneLevel	ENSG00000119684	14	75359229	MLH3	C	1.29749e-07	-5.27911	8.31301e-05	NA	NA	1
14:75359229:C:T	BIOSQTL	BIOS_eQTL_geneLevel	ENSG00000119718	14	75359229	EIF2B2	C	1.04378e-06	-4.88317	0.000915799	NA	NA	1
14:75359229:C:T	BIOSQTL	BIOS_eQTL_geneLevel	ENSG00000119718	14	75359229	EIF2B2	C	4.32995e-22	-9.66283	0	NA	NA	1
14:75359229:C:T	BIOSQTL	BIOS_eQTL_geneLevel	ENSG00000198208	14	75359229	RPS6KL1	C	1.33953e-14	-7.70192	0	NA	NA	1
14:75359441:C:T	BIOSQTL	BIOS_eQTL_geneLevel	ENSG00000119616	14	75359441	FCF1	C	7.77603e-05	3.95126	0.0427901	C	+	1
14:75359441:C:T	BIOSQTL	BIOS_eQTL_geneLevel	ENSG00000119630	14	75359441	PGF	C	2.88624e-13	-7.29959	0	C	-	1
14:75359441:C:T	BIOSQTL	BIOS_eQTL_geneLevel	ENSG00000119638	14	75359441	NEK9	C	5.03492e-05	-4.05387	0.0292841	C	-	1
14:75359441:C:T	BIOSQTL	BIOS_eQTL_geneLevel	ENSG00000119640	14	75359441	ACYP1	C	1.90265e-10	-6.36885	0	C	-	1
14:75359441:C:T	BIOSQTL	BIOS_eQTL_geneLevel	ENSG00000119684	14	75359441	MLH3	C	1.48302e-09	-6.0461	6.12407e-06	C	-	1
14:75359441:C:T	BIOSQTL	BIOS_eQTL_geneLevel	ENSG00000119718	14	75359441	EIF2B2	C	6.0976e-32	-11.7623	0	C	-	1
14:75359441:C:T	BIOSQTL	BIOS_eQTL_geneLevel	ENSG00000119718	14	75359441	EIF2B2	C	1.8465e-08	-5.62566	3.47846e-05	C	-	1
14:75359441:C:T	BIOSQTL	BIOS_eQTL_geneLevel	ENSG00000198208	14	75359441	RPS6KL1	C	3.55748e-32	-11.8077	0	C	-	1
14:75362552:C:T	BIOSQTL	BIOS_eQTL_geneLevel	ENSG00000119616	14	75362552	FCF1	C	6.73098e-05	3.98575	0.0379298	C	+	1
14:75362552:C:T	BIOSQTL	BIOS_eQTL_geneLevel	ENSG00000119630	14	75362552	PGF	C	7.0601e-15	-7.78327	0	C	-	1
14:75362552:C:T	BIOSQTL	BIOS_eQTL_geneLevel	ENSG00000119638	14	75362552	NEK9	C	5.59194e-05	-4.0294	0.0323285	C	-	1
14:75362552:C:T	BIOSQTL	BIOS_eQTL_geneLevel	ENSG00000119640	14	75362552	ACYP1	C	3.00734e-10	-6.29832	0	C	-	1
14:75362552:C:T	BIOSQTL	BIOS_eQTL_geneLevel	ENSG00000119684	14	75362552	MLH3	C	1.39991e-08	-5.67332	2.33454e-05	C	-	1
14:75362552:C:T	BIOSQTL	BIOS_eQTL_geneLevel	ENSG00000119718	14	75362552	EIF2B2	C	2.5551e-32	-11.8355	0	C	-	1
14:75362552:C:T	BIOSQTL	BIOS_eQTL_geneLevel	ENSG00000119718	14	75362552	EIF2B2	C	1.67501e-08	-5.64246	2.32464e-05	C	-	1
14:75362552:C:T	BIOSQTL	BIOS_eQTL_geneLevel	ENSG00000198208	14	75362552	RPS6KL1	C	4.91982e-35	-12.3492	0	C	-	1
14:75363369:A:G	BIOSQTL	BIOS_eQTL_geneLevel	ENSG00000119616	14	75363369	FCF1	A	8.39621e-05	3.93299	0.0458517	A	+	1
14:75363369:A:G	BIOSQTL	BIOS_eQTL_geneLevel	ENSG00000119630	14	75363369	PGF	A	2.58919e-13	-7.31406	0	A	-	1
14:75363369:A:G	BIOSQTL	BIOS_eQTL_geneLevel	ENSG00000119638	14	75363369	NEK9	A	5.25021e-05	-4.04418	0.0304126	A	-	1
14:75363369:A:G	BIOSQTL	BIOS_eQTL_geneLevel	ENSG00000119640	14	75363369	ACYP1	A	1.85366e-10	-6.37288	0	A	-	1
14:75363369:A:G	BIOSQTL	BIOS_eQTL_geneLevel	ENSG00000119684	14	75363369	MLH3	A	1.62143e-09	-6.03174	6.10986e-06	A	-	1
14:75363369:A:G	BIOSQTL	BIOS_eQTL_geneLevel	ENSG00000119718	14	75363369	EIF2B2	A	6.71941e-32	-11.754	0	A	-	1
14:75363369:A:G	BIOSQTL	BIOS_eQTL_geneLevel	ENSG00000119718	14	75363369	EIF2B2	A	2.1043e-08	-5.60316	3.46721e-05	A	-	1
14:75363369:A:G	BIOSQTL	BIOS_eQTL_geneLevel	ENSG00000198208	14	75363369	RPS6KL1	A	3.84785e-32	-11.8012	0	A	-	1
14:75363641:C:T	BIOSQTL	BIOS_eQTL_geneLevel	ENSG00000119616	14	75363641	FCF1	T	8.39621e-05	3.93299	0.0458517	T	+	1
14:75363641:C:T	BIOSQTL	BIOS_eQTL_geneLevel	ENSG00000119630	14	75363641	PGF	T	2.58919e-13	-7.31406	0	T	-	1
14:75363641:C:T	BIOSQTL	BIOS_eQTL_geneLevel	ENSG00000119638	14	75363641	NEK9	T	4.65712e-05	-4.07205	0.0273704	T	-	1
14:75363641:C:T	BIOSQTL	BIOS_eQTL_geneLevel	ENSG00000119640	14	75363641	ACYP1	T	1.85366e-10	-6.37288	0	T	-	1
14:75363641:C:T	BIOSQTL	BIOS_eQTL_geneLevel	ENSG00000119684	14	75363641	MLH3	T	1.66412e-09	-6.02757	6.10687e-06	T	-	1
14:75363641:C:T	BIOSQTL	BIOS_eQTL_geneLevel	ENSG00000119718	14	75363641	EIF2B2	T	8.02419e-32	-11.7392	0	T	-	1
14:75363641:C:T	BIOSQTL	BIOS_eQTL_geneLevel	ENSG00000119718	14	75363641	EIF2B2	T	2.1043e-08	-5.60316	3.46721e-05	T	-	1
14:75363641:C:T	BIOSQTL	BIOS_eQTL_geneLevel	ENSG00000198208	14	75363641	RPS6KL1	T	3.84785e-32	-11.8012	0	T	-	1
14:75366447:C:T	BIOSQTL	BIOS_eQTL_geneLevel	ENSG00000119616	14	75366447	FCF1	T	8.90648e-05	3.91871	0.0484596	T	+	1
14:75366447:C:T	BIOSQTL	BIOS_eQTL_geneLevel	ENSG00000119630	14	75366447	PGF	T	2.32569e-13	-7.32846	0	T	-	1
14:75366447:C:T	BIOSQTL	BIOS_eQTL_geneLevel	ENSG00000119638	14	75366447	NEK9	T	4.94101e-05	-4.05838	0.0288085	T	-	1
14:75366447:C:T	BIOSQTL	BIOS_eQTL_geneLevel	ENSG00000119640	14	75366447	ACYP1	T	1.98367e-10	-6.36248	0	T	-	1
14:75366447:C:T	BIOSQTL	BIOS_eQTL_geneLevel	ENSG00000119684	14	75366447	MLH3	T	1.52215e-09	-6.04193	6.11995e-06	T	-	1
14:75366447:C:T	BIOSQTL	BIOS_eQTL_geneLevel	ENSG00000119718	14	75366447	EIF2B2	T	8.8408e-32	-11.7309	0	T	-	1
14:75366447:C:T	BIOSQTL	BIOS_eQTL_geneLevel	ENSG00000119718	14	75366447	EIF2B2	T	1.98389e-08	-5.61336	3.47343e-05	T	-	1
14:75366447:C:T	BIOSQTL	BIOS_eQTL_geneLevel	ENSG00000198208	14	75366447	RPS6KL1	T	3.07685e-32	-11.82	0	T	-	1
14:75367349:C:T	BIOSQTL	BIOS_eQTL_geneLevel	ENSG00000119616	14	75367349	FCF1	C	8.90648e-05	3.91871	0.0484596	C	+	1
14:75367349:C:T	BIOSQTL	BIOS_eQTL_geneLevel	ENSG00000119630	14	75367349	PGF	C	2.32569e-13	-7.32846	0	C	-	1
14:75367349:C:T	BIOSQTL	BIOS_eQTL_geneLevel	ENSG00000119638	14	75367349	NEK9	C	4.65712e-05	-4.07205	0.0273704	C	-	1
14:75367349:C:T	BIOSQTL	BIOS_eQTL_geneLevel	ENSG00000119640	14	75367349	ACYP1	C	1.98367e-10	-6.36248	0	C	-	1
14:75367349:C:T	BIOSQTL	BIOS_eQTL_geneLevel	ENSG00000119684	14	75367349	MLH3	C	1.52215e-09	-6.04193	6.11995e-06	C	-	1
14:75367349:C:T	BIOSQTL	BIOS_eQTL_geneLevel	ENSG00000119718	14	75367349	EIF2B2	C	6.25859e-32	-11.7602	0	C	-	1
14:75367349:C:T	BIOSQTL	BIOS_eQTL_geneLevel	ENSG00000119718	14	75367349	EIF2B2	C	1.98389e-08	-5.61336	3.47343e-05	C	-	1
14:75367349:C:T	BIOSQTL	BIOS_eQTL_geneLevel	ENSG00000198208	14	75367349	RPS6KL1	C	3.07685e-32	-11.82	0	C	-	1
14:75367807:C:T	BIOSQTL	BIOS_eQTL_geneLevel	ENSG00000119616	14	75367807	FCF1	T	8.90648e-05	3.91871	0.0484596	T	+	1
14:75367807:C:T	BIOSQTL	BIOS_eQTL_geneLevel	ENSG00000119630	14	75367807	PGF	T	2.32569e-13	-7.32846	0	T	-	1
14:75367807:C:T	BIOSQTL	BIOS_eQTL_geneLevel	ENSG00000119638	14	75367807	NEK9	T	4.65712e-05	-4.07205	0.0273704	T	-	1
14:75367807:C:T	BIOSQTL	BIOS_eQTL_geneLevel	ENSG00000119640	14	75367807	ACYP1	T	1.98367e-10	-6.36248	0	T	-	1
14:75367807:C:T	BIOSQTL	BIOS_eQTL_geneLevel	ENSG00000119684	14	75367807	MLH3	T	1.52215e-09	-6.04193	6.11995e-06	T	-	1
14:75367807:C:T	BIOSQTL	BIOS_eQTL_geneLevel	ENSG00000119718	14	75367807	EIF2B2	T	6.56218e-32	-11.756	0	T	-	1
14:75367807:C:T	BIOSQTL	BIOS_eQTL_geneLevel	ENSG00000119718	14	75367807	EIF2B2	T	1.98389e-08	-5.61336	3.47343e-05	T	-	1
14:75367807:C:T	BIOSQTL	BIOS_eQTL_geneLevel	ENSG00000198208	14	75367807	RPS6KL1	T	3.07685e-32	-11.82	0	T	-	1
14:75369385:C:T	BIOSQTL	BIOS_eQTL_geneLevel	ENSG00000119616	14	75369385	FCF1	T	8.92867e-05	3.91806	0.0486118	T	+	1
14:75369385:C:T	BIOSQTL	BIOS_eQTL_geneLevel	ENSG00000119630	14	75369385	PGF	T	2.08859e-13	-7.34293	0	T	-	1
14:75369385:C:T	BIOSQTL	BIOS_eQTL_geneLevel	ENSG00000119638	14	75369385	NEK9	T	4.57776e-05	-4.07604	0.0269276	T	-	1
14:75369385:C:T	BIOSQTL	BIOS_eQTL_geneLevel	ENSG00000119640	14	75369385	ACYP1	T	1.93264e-10	-6.36652	0	T	-	1
14:75369385:C:T	BIOSQTL	BIOS_eQTL_geneLevel	ENSG00000119684	14	75369385	MLH3	T	1.52215e-09	-6.04193	6.11995e-06	T	-	1
14:75369385:C:T	BIOSQTL	BIOS_eQTL_geneLevel	ENSG00000119718	14	75369385	EIF2B2	T	6.89669e-32	-11.7519	0	T	-	1
14:75369385:C:T	BIOSQTL	BIOS_eQTL_geneLevel	ENSG00000119718	14	75369385	EIF2B2	T	2.03029e-08	-5.60927	3.47122e-05	T	-	1
14:75369385:C:T	BIOSQTL	BIOS_eQTL_geneLevel	ENSG00000198208	14	75369385	RPS6KL1	T	2.92678e-32	-11.8241	0	T	-	1
14:75374899:C:T	BIOSQTL	BIOS_eQTL_geneLevel	ENSG00000119616	14	75374899	FCF1	T	7.55167e-05	3.95829	0.0418298	T	+	1
14:75374899:C:T	BIOSQTL	BIOS_eQTL_geneLevel	ENSG00000119630	14	75374899	PGF	T	1.50179e-13	-7.38691	0	T	-	1
14:75374899:C:T	BIOSQTL	BIOS_eQTL_geneLevel	ENSG00000119638	14	75374899	NEK9	T	4.26195e-05	-4.09268	0.0252984	T	-	1
14:75374899:C:T	BIOSQTL	BIOS_eQTL_geneLevel	ENSG00000119640	14	75374899	ACYP1	T	3.61048e-10	-6.26988	0	T	-	1
14:75374899:C:T	BIOSQTL	BIOS_eQTL_geneLevel	ENSG00000119684	14	75374899	MLH3	T	1.40418e-09	-6.05497	6.13046e-06	T	-	1
14:75374899:C:T	BIOSQTL	BIOS_eQTL_geneLevel	ENSG00000119718	14	75374899	EIF2B2	T	1.34869e-31	-11.695	0	T	-	1
14:75374899:C:T	BIOSQTL	BIOS_eQTL_geneLevel	ENSG00000119718	14	75374899	EIF2B2	T	2.56794e-08	-5.56858	3.45344e-05	T	-	1
14:75374899:C:T	BIOSQTL	BIOS_eQTL_geneLevel	ENSG00000198208	14	75374899	RPS6KL1	T	6.60281e-33	-11.9486	0	T	-	1
14:75377008:C:T	BIOSQTL	BIOS_eQTL_geneLevel	ENSG00000119630	14	75377008	PGF	T	1.18365e-13	-7.41856	0	T	-	1
14:75377008:C:T	BIOSQTL	BIOS_eQTL_geneLevel	ENSG00000119638	14	75377008	NEK9	T	3.89874e-05	-4.11327	0.0234449	T	-	1
14:75377008:C:T	BIOSQTL	BIOS_eQTL_geneLevel	ENSG00000119640	14	75377008	ACYP1	T	1.46285e-10	-6.40907	0	T	-	1
14:75377008:C:T	BIOSQTL	BIOS_eQTL_geneLevel	ENSG00000119684	14	75377008	MLH3	T	1.34105e-09	-6.06233	6.14024e-06	T	-	1
14:75377008:C:T	BIOSQTL	BIOS_eQTL_geneLevel	ENSG00000119718	14	75377008	EIF2B2	T	6.4086e-32	-11.7581	0	T	-	1
14:75377008:C:T	BIOSQTL	BIOS_eQTL_geneLevel	ENSG00000119718	14	75377008	EIF2B2	T	1.4617e-08	-5.66593	2.33359e-05	T	-	1
14:75377008:C:T	BIOSQTL	BIOS_eQTL_geneLevel	ENSG00000198208	14	75377008	RPS6KL1	T	1.80333e-32	-11.8646	0	T	-	1
15:78711803:G:T	BIOSQTL	BIOS_eQTL_geneLevel	ENSG00000041357	15	78711803	PSMA4	G	4.18431e-11	-6.5973	0	T	+	1
15:78711803:G:T	BIOSQTL	BIOS_eQTL_geneLevel	ENSG00000080644	15	78711803	CHRNA3	G	8.45999e-06	-4.45311	0.0058473	T	+	1
15:78711803:G:T	BIOSQTL	BIOS_eQTL_geneLevel	ENSG00000080644	15	78711803	CHRNA3	G	6.28139e-08	-5.41055	5.63793e-05	T	+	1
15:78711803:G:T	BIOSQTL	BIOS_eQTL_geneLevel	ENSG00000169684	15	78711803	CHRNA5	G	6.28139e-08	-5.41055	5.63793e-05	T	+	1
15:78711803:G:T	BIOSQTL	BIOS_eQTL_geneLevel	ENSG00000169684	15	78711803	CHRNA5	G	1.73673e-11	-6.72647	0	T	+	1
15:78711803:G:T	BIOSQTL	BIOS_eQTL_geneLevel	ENSG00000169684	15	78711803	CHRNA5	G	5.11304e-14	-7.52885	0	T	+	1
15:78712119:A:T	BIOSQTL	BIOS_eQTL_geneLevel	ENSG00000041357	15	78712119	PSMA4	A	1.0261e-05	-4.41159	0.00704075	NA	NA	1
15:78712119:A:T	BIOSQTL	BIOS_eQTL_geneLevel	ENSG00000080644	15	78712119	CHRNA3	A	1.5833e-07	-5.24257	9.36433e-05	NA	NA	1
15:78712119:A:T	BIOSQTL	BIOS_eQTL_geneLevel	ENSG00000080644	15	78712119	CHRNA3	A	1.0694e-10	-6.45663	0	NA	NA	1
15:78712119:A:T	BIOSQTL	BIOS_eQTL_geneLevel	ENSG00000169684	15	78712119	CHRNA5	A	1.0694e-10	-6.45663	0	NA	NA	1
15:78712119:A:T	BIOSQTL	BIOS_eQTL_geneLevel	ENSG00000169684	15	78712119	CHRNA5	A	1.67758e-14	-7.67304	0	NA	NA	1
15:78712119:A:T	BIOSQTL	BIOS_eQTL_geneLevel	ENSG00000169684	15	78712119	CHRNA5	A	4.98496e-19	-8.91257	0	NA	NA	1
15:78714561:C:T	BIOSQTL	BIOS_eQTL_geneLevel	ENSG00000041357	15	78714561	PSMA4	C	8.22557e-18	-8.59639	0	T	+	1
15:78714561:C:T	BIOSQTL	BIOS_eQTL_geneLevel	ENSG00000080644	15	78714561	CHRNA3	C	1.119e-05	-4.39276	0.00762581	T	+	1
15:78714561:C:T	BIOSQTL	BIOS_eQTL_geneLevel	ENSG00000080644	15	78714561	CHRNA3	C	1.87361e-06	-4.76643	0.00146106	T	+	1
15:78714561:C:T	BIOSQTL	BIOS_eQTL_geneLevel	ENSG00000169684	15	78714561	CHRNA5	C	1.119e-05	-4.39276	0.00762581	T	+	1
15:78714561:C:T	BIOSQTL	BIOS_eQTL_geneLevel	ENSG00000169684	15	78714561	CHRNA5	C	2.49004e-10	-6.3275	0	T	+	1
15:78714561:C:T	BIOSQTL	BIOS_eQTL_geneLevel	ENSG00000169684	15	78714561	CHRNA5	C	7.95084e-13	-7.16189	0	T	+	1
15:78718899:C:T	BIOSQTL	BIOS_eQTL_geneLevel	ENSG00000041357	15	78718899	PSMA4	T	4.56294e-18	-8.66371	0	C	+	1
15:78718899:C:T	BIOSQTL	BIOS_eQTL_geneLevel	ENSG00000080644	15	78718899	CHRNA3	T	1.12727e-05	-4.3911	0.00767745	C	+	1
15:78718899:C:T	BIOSQTL	BIOS_eQTL_geneLevel	ENSG00000080644	15	78718899	CHRNA3	T	2.13297e-06	-4.74022	0.00165548	C	+	1
15:78718899:C:T	BIOSQTL	BIOS_eQTL_geneLevel	ENSG00000169684	15	78718899	CHRNA5	T	1.12727e-05	-4.3911	0.00767745	C	+	1
15:78718899:C:T	BIOSQTL	BIOS_eQTL_geneLevel	ENSG00000169684	15	78718899	CHRNA5	T	2.06537e-10	-6.35625	0	C	+	1
15:78718899:C:T	BIOSQTL	BIOS_eQTL_geneLevel	ENSG00000169684	15	78718899	CHRNA5	T	5.7198e-13	-7.20684	0	C	+	1
15:78719832:C:G	BIOSQTL	BIOS_eQTL_geneLevel	ENSG00000041357	15	78719832	PSMA4	C	6.98978e-47	14.3794	0	C	+	1
15:78719832:C:G	BIOSQTL	BIOS_eQTL_geneLevel	ENSG00000080644	15	78719832	CHRNA3	C	2.72766e-13	-7.3072	0	C	-	1
15:78719832:C:G	BIOSQTL	BIOS_eQTL_geneLevel	ENSG00000080644	15	78719832	CHRNA3	C	5.11397e-18	-8.65071	0	C	-	1
15:78719832:C:G	BIOSQTL	BIOS_eQTL_geneLevel	ENSG00000136381	15	78719832	IREB2	C	3.41397e-06	-4.64409	0.00251931	C	-	1
15:78719832:C:G	BIOSQTL	BIOS_eQTL_geneLevel	ENSG00000169684	15	78719832	CHRNA5	C	7.62263e-30	-11.3474	0	C	-	1
15:78719832:C:G	BIOSQTL	BIOS_eQTL_geneLevel	ENSG00000169684	15	78719832	CHRNA5	C	4.0685e-15	-7.85277	0	C	-	1
15:78719832:C:G	BIOSQTL	BIOS_eQTL_geneLevel	ENSG00000169684	15	78719832	CHRNA5	C	5.11397e-18	-8.65071	0	C	-	1
15:78720194:A:C	BIOSQTL	BIOS_eQTL_geneLevel	ENSG00000041357	15	78720194	PSMA4	C	9.18413e-20	-9.09812	0	A	+	1
15:78720194:A:C	BIOSQTL	BIOS_eQTL_geneLevel	ENSG00000080644	15	78720194	CHRNA3	C	3.39814e-05	-4.14499	0.020555	A	+	1
15:78720194:A:C	BIOSQTL	BIOS_eQTL_geneLevel	ENSG00000169684	15	78720194	CHRNA5	C	3.39814e-05	-4.14499	0.020555	A	+	1
15:78720194:A:C	BIOSQTL	BIOS_eQTL_geneLevel	ENSG00000169684	15	78720194	CHRNA5	C	8.44281e-08	-5.35735	6.71742e-05	A	+	1
15:78720194:A:C	BIOSQTL	BIOS_eQTL_geneLevel	ENSG00000169684	15	78720194	CHRNA5	C	2.58199e-10	-6.3218	0	A	+	1
15:78720923:G:T	BIOSQTL	BIOS_eQTL_geneLevel	ENSG00000041357	15	78720923	PSMA4	G	1.84204e-14	7.66139	0	NA	NA	1
15:78720923:G:T	BIOSQTL	BIOS_eQTL_geneLevel	ENSG00000080644	15	78720923	CHRNA3	G	7.18275e-06	-4.48802	0.00495307	NA	NA	1
15:78720923:G:T	BIOSQTL	BIOS_eQTL_geneLevel	ENSG00000080644	15	78720923	CHRNA3	G	2.01813e-06	-4.75158	0.00157044	NA	NA	1
15:78720923:G:T	BIOSQTL	BIOS_eQTL_geneLevel	ENSG00000169684	15	78720923	CHRNA5	G	2.01813e-06	-4.75158	0.00157044	NA	NA	1
15:78720923:G:T	BIOSQTL	BIOS_eQTL_geneLevel	ENSG00000169684	15	78720923	CHRNA5	G	4.59729e-07	-5.04228	0.000337331	NA	NA	1
15:78720923:G:T	BIOSQTL	BIOS_eQTL_geneLevel	ENSG00000169684	15	78720923	CHRNA5	G	1.47096e-12	-7.07708	0	NA	NA	1
15:78721397:G:T	BIOSQTL	BIOS_eQTL_geneLevel	ENSG00000041357	15	78721397	PSMA4	G	5.23804e-20	-9.15887	0	T	+	1
15:78721397:G:T	BIOSQTL	BIOS_eQTL_geneLevel	ENSG00000080644	15	78721397	CHRNA3	G	2.97986e-05	-4.17487	0.0182205	T	+	1
15:78721397:G:T	BIOSQTL	BIOS_eQTL_geneLevel	ENSG00000169684	15	78721397	CHRNA5	G	2.97986e-05	-4.17487	0.0182205	T	+	1
15:78721397:G:T	BIOSQTL	BIOS_eQTL_geneLevel	ENSG00000169684	15	78721397	CHRNA5	G	4.71331e-08	-5.46178	4.54236e-05	T	+	1
15:78721397:G:T	BIOSQTL	BIOS_eQTL_geneLevel	ENSG00000169684	15	78721397	CHRNA5	G	1.40638e-10	-6.41511	0	T	+	1
15:78722359:C:T	BIOSQTL	BIOS_eQTL_geneLevel	ENSG00000041357	15	78722359	PSMA4	T	2.94892e-20	-9.22065	0	C	+	1
15:78722359:C:T	BIOSQTL	BIOS_eQTL_geneLevel	ENSG00000080644	15	78722359	CHRNA3	T	3.78544e-05	-4.12007	0.022857	C	+	1
15:78722359:C:T	BIOSQTL	BIOS_eQTL_geneLevel	ENSG00000169684	15	78722359	CHRNA5	T	3.78544e-05	-4.12007	0.022857	C	+	1
15:78722359:C:T	BIOSQTL	BIOS_eQTL_geneLevel	ENSG00000169684	15	78722359	CHRNA5	T	3.56801e-08	-5.5109	4.57091e-05	C	+	1
15:78722359:C:T	BIOSQTL	BIOS_eQTL_geneLevel	ENSG00000169684	15	78722359	CHRNA5	T	1.10384e-10	-6.45187	0	C	+	1
15:78722519:C:T	BIOSQTL	BIOS_eQTL_geneLevel	ENSG00000041357	15	78722519	PSMA4	T	2.94892e-20	-9.22065	0	C	+	1
15:78722519:C:T	BIOSQTL	BIOS_eQTL_geneLevel	ENSG00000080644	15	78722519	CHRNA3	T	3.78544e-05	-4.12007	0.022857	C	+	1
15:78722519:C:T	BIOSQTL	BIOS_eQTL_geneLevel	ENSG00000169684	15	78722519	CHRNA5	T	3.78544e-05	-4.12007	0.022857	C	+	1
15:78722519:C:T	BIOSQTL	BIOS_eQTL_geneLevel	ENSG00000169684	15	78722519	CHRNA5	T	3.56801e-08	-5.5109	4.57091e-05	C	+	1
15:78722519:C:T	BIOSQTL	BIOS_eQTL_geneLevel	ENSG00000169684	15	78722519	CHRNA5	T	1.10384e-10	-6.45187	0	C	+	1
15:78724256:A:G	BIOSQTL	BIOS_eQTL_geneLevel	ENSG00000041357	15	78724256	PSMA4	A	1.09852e-18	-8.82457	0	G	+	1
15:78724256:A:G	BIOSQTL	BIOS_eQTL_geneLevel	ENSG00000080644	15	78724256	CHRNA3	A	6.05646e-05	-4.01056	0.0346891	G	+	1
15:78724256:A:G	BIOSQTL	BIOS_eQTL_geneLevel	ENSG00000080644	15	78724256	CHRNA3	A	8.32698e-06	-4.45643	0.00577365	G	+	1
15:78724256:A:G	BIOSQTL	BIOS_eQTL_geneLevel	ENSG00000169684	15	78724256	CHRNA5	A	8.32698e-06	-4.45643	0.00577365	G	+	1
15:78724256:A:G	BIOSQTL	BIOS_eQTL_geneLevel	ENSG00000169684	15	78724256	CHRNA5	A	2.99036e-08	-5.54196	4.58821e-05	G	+	1
15:78724256:A:G	BIOSQTL	BIOS_eQTL_geneLevel	ENSG00000169684	15	78724256	CHRNA5	A	4.62914e-11	-6.58223	0	G	+	1
15:78724469:C:T	BIOSQTL	BIOS_eQTL_geneLevel	ENSG00000041357	15	78724469	PSMA4	T	3.45059e-36	12.5613	0	T	+	1
15:78724469:C:T	BIOSQTL	BIOS_eQTL_geneLevel	ENSG00000080644	15	78724469	CHRNA3	T	7.01201e-11	-6.52035	0	T	-	1
15:78724469:C:T	BIOSQTL	BIOS_eQTL_geneLevel	ENSG00000080644	15	78724469	CHRNA3	T	3.63323e-16	-8.15007	0	T	-	1
15:78724469:C:T	BIOSQTL	BIOS_eQTL_geneLevel	ENSG00000136381	15	78724469	IREB2	T	6.19566e-06	-4.51949	0.00434181	T	-	1
15:78724469:C:T	BIOSQTL	BIOS_eQTL_geneLevel	ENSG00000169684	15	78724469	CHRNA5	T	1.35163e-11	-6.76288	0	T	-	1
15:78724469:C:T	BIOSQTL	BIOS_eQTL_geneLevel	ENSG00000169684	15	78724469	CHRNA5	T	3.63323e-16	-8.15007	0	T	-	1
15:78724469:C:T	BIOSQTL	BIOS_eQTL_geneLevel	ENSG00000169684	15	78724469	CHRNA5	T	2.00433e-21	-9.50477	0	T	-	1
15:78726271:C:G	BIOSQTL	BIOS_eQTL_geneLevel	ENSG00000041357	15	78726271	PSMA4	G	2.63648e-20	-9.23275	0	C	+	1
15:78726271:C:G	BIOSQTL	BIOS_eQTL_geneLevel	ENSG00000080644	15	78726271	CHRNA3	G	3.91907e-05	-4.11212	0.023572	C	+	1
15:78726271:C:G	BIOSQTL	BIOS_eQTL_geneLevel	ENSG00000169684	15	78726271	CHRNA5	G	3.91907e-05	-4.11212	0.023572	C	+	1
15:78726271:C:G	BIOSQTL	BIOS_eQTL_geneLevel	ENSG00000169684	15	78726271	CHRNA5	G	3.65e-08	-5.50686	4.57012e-05	C	+	1
15:78726271:C:G	BIOSQTL	BIOS_eQTL_geneLevel	ENSG00000169684	15	78726271	CHRNA5	G	9.77438e-11	-6.47025	0	C	+	1
15:78726272:A:T	BIOSQTL	BIOS_eQTL_geneLevel	ENSG00000041357	15	78726272	PSMA4	A	2.63648e-20	-9.23275	0	T	+	1
15:78726272:A:T	BIOSQTL	BIOS_eQTL_geneLevel	ENSG00000080644	15	78726272	CHRNA3	A	3.91907e-05	-4.11212	0.023572	T	+	1
15:78726272:A:T	BIOSQTL	BIOS_eQTL_geneLevel	ENSG00000169684	15	78726272	CHRNA5	A	3.91907e-05	-4.11212	0.023572	T	+	1
15:78726272:A:T	BIOSQTL	BIOS_eQTL_geneLevel	ENSG00000169684	15	78726272	CHRNA5	A	3.65e-08	-5.50686	4.57012e-05	T	+	1
15:78726272:A:T	BIOSQTL	BIOS_eQTL_geneLevel	ENSG00000169684	15	78726272	CHRNA5	A	9.77438e-11	-6.47025	0	T	+	1
15:78730313:A:G	BIOSQTL	BIOS_eQTL_geneLevel	ENSG00000041357	15	78730313	PSMA4	A	4.71738e-48	14.5647	0	A	+	1
15:78730313:A:G	BIOSQTL	BIOS_eQTL_geneLevel	ENSG00000080644	15	78730313	CHRNA3	A	5.44421e-14	-7.52066	0	A	-	1
15:78730313:A:G	BIOSQTL	BIOS_eQTL_geneLevel	ENSG00000080644	15	78730313	CHRNA3	A	3.16457e-18	-8.70535	0	A	-	1
15:78730313:A:G	BIOSQTL	BIOS_eQTL_geneLevel	ENSG00000136381	15	78730313	IREB2	A	4.63201e-06	-4.58061	0.00327222	A	-	1
15:78730313:A:G	BIOSQTL	BIOS_eQTL_geneLevel	ENSG00000169684	15	78730313	CHRNA5	A	1.68995e-30	-11.4785	0	A	-	1
15:78730313:A:G	BIOSQTL	BIOS_eQTL_geneLevel	ENSG00000169684	15	78730313	CHRNA5	A	4.46261e-15	-7.841	0	A	-	1
15:78730313:A:G	BIOSQTL	BIOS_eQTL_geneLevel	ENSG00000169684	15	78730313	CHRNA5	A	3.16457e-18	-8.70535	0	A	-	1
15:78731149:C:T	BIOSQTL	BIOS_eQTL_geneLevel	ENSG00000041357	15	78731149	PSMA4	T	3.77621e-48	14.58	0	T	+	1
15:78731149:C:T	BIOSQTL	BIOS_eQTL_geneLevel	ENSG00000080644	15	78731149	CHRNA3	T	5.44421e-14	-7.52066	0	T	-	1
15:78731149:C:T	BIOSQTL	BIOS_eQTL_geneLevel	ENSG00000080644	15	78731149	CHRNA3	T	3.16457e-18	-8.70535	0	T	-	1
15:78731149:C:T	BIOSQTL	BIOS_eQTL_geneLevel	ENSG00000136381	15	78731149	IREB2	T	4.54421e-06	-4.58466	0.00320468	T	-	1
15:78731149:C:T	BIOSQTL	BIOS_eQTL_geneLevel	ENSG00000169684	15	78731149	CHRNA5	T	2.0052e-30	-11.4636	0	T	-	1
15:78731149:C:T	BIOSQTL	BIOS_eQTL_geneLevel	ENSG00000169684	15	78731149	CHRNA5	T	5.01241e-15	-7.82645	0	T	-	1
15:78731149:C:T	BIOSQTL	BIOS_eQTL_geneLevel	ENSG00000169684	15	78731149	CHRNA5	T	3.16457e-18	-8.70535	0	T	-	1
15:78731808:A:T	BIOSQTL	BIOS_eQTL_geneLevel	ENSG00000041357	15	78731808	PSMA4	T	4.23945e-20	-9.18164	0	A	+	1
15:78731808:A:T	BIOSQTL	BIOS_eQTL_geneLevel	ENSG00000080644	15	78731808	CHRNA3	T	3.61189e-05	-4.13086	0.0217933	A	+	1
15:78731808:A:T	BIOSQTL	BIOS_eQTL_geneLevel	ENSG00000169684	15	78731808	CHRNA5	T	3.61189e-05	-4.13086	0.0217933	A	+	1
15:78731808:A:T	BIOSQTL	BIOS_eQTL_geneLevel	ENSG00000169684	15	78731808	CHRNA5	T	6.17701e-08	-5.41357	5.64048e-05	A	+	1
15:78731808:A:T	BIOSQTL	BIOS_eQTL_geneLevel	ENSG00000169684	15	78731808	CHRNA5	T	1.72071e-10	-6.38431	0	A	+	1
15:78732754:A:G	BIOSQTL	BIOS_eQTL_geneLevel	ENSG00000041357	15	78732754	PSMA4	A	4.66915e-20	-9.17126	0	G	+	1
15:78732754:A:G	BIOSQTL	BIOS_eQTL_geneLevel	ENSG00000080644	15	78732754	CHRNA3	A	3.84503e-05	-4.11657	0.0231317	G	+	1
15:78732754:A:G	BIOSQTL	BIOS_eQTL_geneLevel	ENSG00000169684	15	78732754	CHRNA5	A	3.84503e-05	-4.11657	0.0231317	G	+	1
15:78732754:A:G	BIOSQTL	BIOS_eQTL_geneLevel	ENSG00000169684	15	78732754	CHRNA5	A	5.14573e-08	-5.44616	4.53335e-05	G	+	1
15:78732754:A:G	BIOSQTL	BIOS_eQTL_geneLevel	ENSG00000169684	15	78732754	CHRNA5	A	1.6763e-10	-6.38828	0	G	+	1
15:78733390:A:T	BIOSQTL	BIOS_eQTL_geneLevel	ENSG00000041357	15	78733390	PSMA4	T	6.39924e-50	14.8557	0	T	+	1
15:78733390:A:T	BIOSQTL	BIOS_eQTL_geneLevel	ENSG00000080644	15	78733390	CHRNA3	T	2.44413e-14	-7.62479	0	T	-	1
15:78733390:A:T	BIOSQTL	BIOS_eQTL_geneLevel	ENSG00000080644	15	78733390	CHRNA3	T	1.80683e-19	-9.02439	0	T	-	1
15:78733390:A:T	BIOSQTL	BIOS_eQTL_geneLevel	ENSG00000136381	15	78733390	IREB2	T	9.689e-06	-4.42397	0.0066644	T	-	1
15:78733390:A:T	BIOSQTL	BIOS_eQTL_geneLevel	ENSG00000169684	15	78733390	CHRNA5	T	7.91567e-31	-11.5438	0	T	-	1
15:78733390:A:T	BIOSQTL	BIOS_eQTL_geneLevel	ENSG00000169684	15	78733390	CHRNA5	T	7.7992e-15	-7.77076	0	T	-	1
15:78733390:A:T	BIOSQTL	BIOS_eQTL_geneLevel	ENSG00000169684	15	78733390	CHRNA5	T	1.80683e-19	-9.02439	0	T	-	1
15:78733731:C:T	BIOSQTL	BIOS_eQTL_geneLevel	ENSG00000041357	15	78733731	PSMA4	C	3.95741e-49	14.7332	0	C	+	1
15:78733731:C:T	BIOSQTL	BIOS_eQTL_geneLevel	ENSG00000080644	15	78733731	CHRNA3	C	4.19504e-14	-7.55469	0	C	-	1
15:78733731:C:T	BIOSQTL	BIOS_eQTL_geneLevel	ENSG00000080644	15	78733731	CHRNA3	C	3.83576e-19	-8.94155	0	C	-	1
15:78733731:C:T	BIOSQTL	BIOS_eQTL_geneLevel	ENSG00000136381	15	78733731	IREB2	C	8.53918e-06	-4.45102	0.00589298	C	-	1
15:78733731:C:T	BIOSQTL	BIOS_eQTL_geneLevel	ENSG00000169684	15	78733731	CHRNA5	C	2.23506e-30	-11.4544	0	C	-	1
15:78733731:C:T	BIOSQTL	BIOS_eQTL_geneLevel	ENSG00000169684	15	78733731	CHRNA5	C	7.88588e-15	-7.76929	0	C	-	1
15:78733731:C:T	BIOSQTL	BIOS_eQTL_geneLevel	ENSG00000169684	15	78733731	CHRNA5	C	3.83576e-19	-8.94155	0	C	-	1
15:78735269:C:T	BIOSQTL	BIOS_eQTL_geneLevel	ENSG00000041357	15	78735269	PSMA4	T	5.08481e-50	14.8711	0	T	+	1
15:78735269:C:T	BIOSQTL	BIOS_eQTL_geneLevel	ENSG00000080644	15	78735269	CHRNA3	T	1.94822e-14	-7.65398	0	T	-	1
15:78735269:C:T	BIOSQTL	BIOS_eQTL_geneLevel	ENSG00000080644	15	78735269	CHRNA3	T	1.80683e-19	-9.02439	0	T	-	1
15:78735269:C:T	BIOSQTL	BIOS_eQTL_geneLevel	ENSG00000136381	15	78735269	IREB2	T	9.689e-06	-4.42397	0.0066644	T	-	1
15:78735269:C:T	BIOSQTL	BIOS_eQTL_geneLevel	ENSG00000169684	15	78735269	CHRNA5	T	7.91567e-31	-11.5438	0	T	-	1
15:78735269:C:T	BIOSQTL	BIOS_eQTL_geneLevel	ENSG00000169684	15	78735269	CHRNA5	T	7.7992e-15	-7.77076	0	T	-	1
15:78735269:C:T	BIOSQTL	BIOS_eQTL_geneLevel	ENSG00000169684	15	78735269	CHRNA5	T	1.80683e-19	-9.02439	0	T	-	1
15:78735438:C:G	BIOSQTL	BIOS_eQTL_geneLevel	ENSG00000041357	15	78735438	PSMA4	C	5.08481e-50	14.8711	0	C	+	1
15:78735438:C:G	BIOSQTL	BIOS_eQTL_geneLevel	ENSG00000080644	15	78735438	CHRNA3	C	1.94822e-14	-7.65398	0	C	-	1
15:78735438:C:G	BIOSQTL	BIOS_eQTL_geneLevel	ENSG00000080644	15	78735438	CHRNA3	C	1.80683e-19	-9.02439	0	C	-	1
15:78735438:C:G	BIOSQTL	BIOS_eQTL_geneLevel	ENSG00000136381	15	78735438	IREB2	C	9.689e-06	-4.42397	0.0066644	C	-	1
15:78735438:C:G	BIOSQTL	BIOS_eQTL_geneLevel	ENSG00000169684	15	78735438	CHRNA5	C	7.91567e-31	-11.5438	0	C	-	1
15:78735438:C:G	BIOSQTL	BIOS_eQTL_geneLevel	ENSG00000169684	15	78735438	CHRNA5	C	7.7992e-15	-7.77076	0	C	-	1
15:78735438:C:G	BIOSQTL	BIOS_eQTL_geneLevel	ENSG00000169684	15	78735438	CHRNA5	C	1.80683e-19	-9.02439	0	C	-	1
15:78736593:A:T	BIOSQTL	BIOS_eQTL_geneLevel	ENSG00000041357	15	78736593	PSMA4	T	2.63156e-20	-9.2328	0	A	+	1
15:78736593:A:T	BIOSQTL	BIOS_eQTL_geneLevel	ENSG00000080644	15	78736593	CHRNA3	T	4.43433e-05	-4.08355	0.0261828	A	+	1
15:78736593:A:T	BIOSQTL	BIOS_eQTL_geneLevel	ENSG00000169684	15	78736593	CHRNA5	T	4.43433e-05	-4.08355	0.0261828	A	+	1
15:78736593:A:T	BIOSQTL	BIOS_eQTL_geneLevel	ENSG00000169684	15	78736593	CHRNA5	T	2.527e-08	-5.57121	3.45423e-05	A	+	1
15:78736593:A:T	BIOSQTL	BIOS_eQTL_geneLevel	ENSG00000169684	15	78736593	CHRNA5	T	8.45919e-11	-6.49205	0	A	+	1
15:78738370:C:T	BIOSQTL	BIOS_eQTL_geneLevel	ENSG00000041357	15	78738370	PSMA4	T	2.63156e-20	-9.2328	0	C	+	1
15:78738370:C:T	BIOSQTL	BIOS_eQTL_geneLevel	ENSG00000080644	15	78738370	CHRNA3	T	4.43433e-05	-4.08355	0.0261828	C	+	1
15:78738370:C:T	BIOSQTL	BIOS_eQTL_geneLevel	ENSG00000169684	15	78738370	CHRNA5	T	4.43433e-05	-4.08355	0.0261828	C	+	1
15:78738370:C:T	BIOSQTL	BIOS_eQTL_geneLevel	ENSG00000169684	15	78738370	CHRNA5	T	2.32895e-08	-5.58545	3.45961e-05	C	+	1
15:78738370:C:T	BIOSQTL	BIOS_eQTL_geneLevel	ENSG00000169684	15	78738370	CHRNA5	T	8.45919e-11	-6.49205	0	C	+	1
15:78739471:C:T	BIOSQTL	BIOS_eQTL_geneLevel	ENSG00000041357	15	78739471	PSMA4	T	2.63156e-20	-9.2328	0	C	+	1
15:78739471:C:T	BIOSQTL	BIOS_eQTL_geneLevel	ENSG00000080644	15	78739471	CHRNA3	T	4.43433e-05	-4.08355	0.0261828	C	+	1
15:78739471:C:T	BIOSQTL	BIOS_eQTL_geneLevel	ENSG00000169684	15	78739471	CHRNA5	T	4.43433e-05	-4.08355	0.0261828	C	+	1
15:78739471:C:T	BIOSQTL	BIOS_eQTL_geneLevel	ENSG00000169684	15	78739471	CHRNA5	T	2.32895e-08	-5.58545	3.45961e-05	C	+	1
15:78739471:C:T	BIOSQTL	BIOS_eQTL_geneLevel	ENSG00000169684	15	78739471	CHRNA5	T	8.45919e-11	-6.49205	0	C	+	1
15:78739763:A:G	BIOSQTL	BIOS_eQTL_geneLevel	ENSG00000041357	15	78739763	PSMA4	G	2.40545e-49	14.7666	0	G	+	1
15:78739763:A:G	BIOSQTL	BIOS_eQTL_geneLevel	ENSG00000080644	15	78739763	CHRNA3	G	3.92668e-14	-7.5634	0	G	-	1
15:78739763:A:G	BIOSQTL	BIOS_eQTL_geneLevel	ENSG00000080644	15	78739763	CHRNA3	G	8.67386e-19	-8.85096	0	G	-	1
15:78739763:A:G	BIOSQTL	BIOS_eQTL_geneLevel	ENSG00000136381	15	78739763	IREB2	G	2.86316e-06	-4.68025	0.00215846	G	-	1
15:78739763:A:G	BIOSQTL	BIOS_eQTL_geneLevel	ENSG00000169684	15	78739763	CHRNA5	G	4.39938e-31	-11.5944	0	G	-	1
15:78739763:A:G	BIOSQTL	BIOS_eQTL_geneLevel	ENSG00000169684	15	78739763	CHRNA5	G	2.5451e-15	-7.91128	0	G	-	1
15:78739763:A:G	BIOSQTL	BIOS_eQTL_geneLevel	ENSG00000169684	15	78739763	CHRNA5	G	8.67386e-19	-8.85096	0	G	-	1
15:78740233:A:G	BIOSQTL	BIOS_eQTL_geneLevel	ENSG00000041357	15	78740233	PSMA4	G	3.01566e-20	-9.2184	0	A	+	1
15:78740233:A:G	BIOSQTL	BIOS_eQTL_geneLevel	ENSG00000080644	15	78740233	CHRNA3	G	4.71344e-05	-4.06929	0.0276246	A	+	1
15:78740233:A:G	BIOSQTL	BIOS_eQTL_geneLevel	ENSG00000169684	15	78740233	CHRNA5	G	4.71344e-05	-4.06929	0.0276246	A	+	1
15:78740233:A:G	BIOSQTL	BIOS_eQTL_geneLevel	ENSG00000169684	15	78740233	CHRNA5	G	2.32895e-08	-5.58545	3.45961e-05	A	+	1
15:78740233:A:G	BIOSQTL	BIOS_eQTL_geneLevel	ENSG00000169684	15	78740233	CHRNA5	G	8.45919e-11	-6.49205	0	A	+	1
15:78740688:G:T	BIOSQTL	BIOS_eQTL_geneLevel	ENSG00000041357	15	78740688	PSMA4	G	5.08481e-50	14.8711	0	G	+	1
15:78740688:G:T	BIOSQTL	BIOS_eQTL_geneLevel	ENSG00000080644	15	78740688	CHRNA3	G	1.94822e-14	-7.65398	0	G	-	1
15:78740688:G:T	BIOSQTL	BIOS_eQTL_geneLevel	ENSG00000080644	15	78740688	CHRNA3	G	1.80683e-19	-9.02439	0	G	-	1
15:78740688:G:T	BIOSQTL	BIOS_eQTL_geneLevel	ENSG00000136381	15	78740688	IREB2	G	9.689e-06	-4.42397	0.0066644	G	-	1
15:78740688:G:T	BIOSQTL	BIOS_eQTL_geneLevel	ENSG00000169684	15	78740688	CHRNA5	G	9.42319e-31	-11.5289	0	G	-	1
15:78740688:G:T	BIOSQTL	BIOS_eQTL_geneLevel	ENSG00000169684	15	78740688	CHRNA5	G	8.73741e-15	-7.75622	0	G	-	1
15:78740688:G:T	BIOSQTL	BIOS_eQTL_geneLevel	ENSG00000169684	15	78740688	CHRNA5	G	1.80683e-19	-9.02439	0	G	-	1
15:78740932:A:C	BIOSQTL	BIOS_eQTL_geneLevel	ENSG00000041357	15	78740932	PSMA4	C	5.08481e-50	14.8711	0	C	+	1
15:78740932:A:C	BIOSQTL	BIOS_eQTL_geneLevel	ENSG00000080644	15	78740932	CHRNA3	C	1.94822e-14	-7.65398	0	C	-	1
15:78740932:A:C	BIOSQTL	BIOS_eQTL_geneLevel	ENSG00000080644	15	78740932	CHRNA3	C	1.80683e-19	-9.02439	0	C	-	1
15:78740932:A:C	BIOSQTL	BIOS_eQTL_geneLevel	ENSG00000136381	15	78740932	IREB2	C	9.689e-06	-4.42397	0.0066644	C	-	1
15:78740932:A:C	BIOSQTL	BIOS_eQTL_geneLevel	ENSG00000169684	15	78740932	CHRNA5	C	9.42319e-31	-11.5289	0	C	-	1
15:78740932:A:C	BIOSQTL	BIOS_eQTL_geneLevel	ENSG00000169684	15	78740932	CHRNA5	C	8.73741e-15	-7.75622	0	C	-	1
15:78740932:A:C	BIOSQTL	BIOS_eQTL_geneLevel	ENSG00000169684	15	78740932	CHRNA5	C	1.80683e-19	-9.02439	0	C	-	1
15:78740964:A:G	BIOSQTL	BIOS_eQTL_geneLevel	ENSG00000041357	15	78740964	PSMA4	A	5.08481e-50	14.8711	0	A	+	1
15:78740964:A:G	BIOSQTL	BIOS_eQTL_geneLevel	ENSG00000080644	15	78740964	CHRNA3	A	1.94822e-14	-7.65398	0	A	-	1
15:78740964:A:G	BIOSQTL	BIOS_eQTL_geneLevel	ENSG00000080644	15	78740964	CHRNA3	A	1.80683e-19	-9.02439	0	A	-	1
15:78740964:A:G	BIOSQTL	BIOS_eQTL_geneLevel	ENSG00000136381	15	78740964	IREB2	A	9.689e-06	-4.42397	0.0066644	A	-	1
15:78740964:A:G	BIOSQTL	BIOS_eQTL_geneLevel	ENSG00000169684	15	78740964	CHRNA5	A	9.42319e-31	-11.5289	0	A	-	1
15:78740964:A:G	BIOSQTL	BIOS_eQTL_geneLevel	ENSG00000169684	15	78740964	CHRNA5	A	8.73741e-15	-7.75622	0	A	-	1
15:78740964:A:G	BIOSQTL	BIOS_eQTL_geneLevel	ENSG00000169684	15	78740964	CHRNA5	A	1.80683e-19	-9.02439	0	A	-	1
15:78741384:C:T	BIOSQTL	BIOS_eQTL_geneLevel	ENSG00000041357	15	78741384	PSMA4	T	3.01566e-20	-9.2184	0	C	+	1
15:78741384:C:T	BIOSQTL	BIOS_eQTL_geneLevel	ENSG00000080644	15	78741384	CHRNA3	T	4.71344e-05	-4.06929	0.0276246	C	+	1
15:78741384:C:T	BIOSQTL	BIOS_eQTL_geneLevel	ENSG00000169684	15	78741384	CHRNA5	T	4.71344e-05	-4.06929	0.0276246	C	+	1
15:78741384:C:T	BIOSQTL	BIOS_eQTL_geneLevel	ENSG00000169684	15	78741384	CHRNA5	T	2.32895e-08	-5.58545	3.45961e-05	C	+	1
15:78741384:C:T	BIOSQTL	BIOS_eQTL_geneLevel	ENSG00000169684	15	78741384	CHRNA5	T	8.45919e-11	-6.49205	0	C	+	1
15:78741618:C:T	BIOSQTL	BIOS_eQTL_geneLevel	ENSG00000041357	15	78741618	PSMA4	C	5.08481e-50	14.8711	0	C	+	1
15:78741618:C:T	BIOSQTL	BIOS_eQTL_geneLevel	ENSG00000080644	15	78741618	CHRNA3	C	1.94822e-14	-7.65398	0	C	-	1
15:78741618:C:T	BIOSQTL	BIOS_eQTL_geneLevel	ENSG00000080644	15	78741618	CHRNA3	C	1.80683e-19	-9.02439	0	C	-	1
15:78741618:C:T	BIOSQTL	BIOS_eQTL_geneLevel	ENSG00000136381	15	78741618	IREB2	C	9.689e-06	-4.42397	0.0066644	C	-	1
15:78741618:C:T	BIOSQTL	BIOS_eQTL_geneLevel	ENSG00000169684	15	78741618	CHRNA5	C	9.42319e-31	-11.5289	0	C	-	1
15:78741618:C:T	BIOSQTL	BIOS_eQTL_geneLevel	ENSG00000169684	15	78741618	CHRNA5	C	8.73741e-15	-7.75622	0	C	-	1
15:78741618:C:T	BIOSQTL	BIOS_eQTL_geneLevel	ENSG00000169684	15	78741618	CHRNA5	C	1.80683e-19	-9.02439	0	C	-	1
15:78742376:A:G	BIOSQTL	BIOS_eQTL_geneLevel	ENSG00000041357	15	78742376	PSMA4	A	5.08481e-50	14.8711	0	A	+	1
15:78742376:A:G	BIOSQTL	BIOS_eQTL_geneLevel	ENSG00000080644	15	78742376	CHRNA3	A	1.94822e-14	-7.65398	0	A	-	1
15:78742376:A:G	BIOSQTL	BIOS_eQTL_geneLevel	ENSG00000080644	15	78742376	CHRNA3	A	1.57823e-19	-9.0391	0	A	-	1
15:78742376:A:G	BIOSQTL	BIOS_eQTL_geneLevel	ENSG00000136381	15	78742376	IREB2	A	9.689e-06	-4.42397	0.0066644	A	-	1
15:78742376:A:G	BIOSQTL	BIOS_eQTL_geneLevel	ENSG00000169684	15	78742376	CHRNA5	A	9.42319e-31	-11.5289	0	A	-	1
15:78742376:A:G	BIOSQTL	BIOS_eQTL_geneLevel	ENSG00000169684	15	78742376	CHRNA5	A	8.73741e-15	-7.75622	0	A	-	1
15:78742376:A:G	BIOSQTL	BIOS_eQTL_geneLevel	ENSG00000169684	15	78742376	CHRNA5	A	1.57823e-19	-9.0391	0	A	-	1
15:78742579:A:G	BIOSQTL	BIOS_eQTL_geneLevel	ENSG00000041357	15	78742579	PSMA4	G	5.08481e-50	14.8711	0	G	+	1
15:78742579:A:G	BIOSQTL	BIOS_eQTL_geneLevel	ENSG00000080644	15	78742579	CHRNA3	G	1.94822e-14	-7.65398	0	G	-	1
15:78742579:A:G	BIOSQTL	BIOS_eQTL_geneLevel	ENSG00000080644	15	78742579	CHRNA3	G	1.57823e-19	-9.0391	0	G	-	1
15:78742579:A:G	BIOSQTL	BIOS_eQTL_geneLevel	ENSG00000136381	15	78742579	IREB2	G	9.689e-06	-4.42397	0.0066644	G	-	1
15:78742579:A:G	BIOSQTL	BIOS_eQTL_geneLevel	ENSG00000169684	15	78742579	CHRNA5	G	9.42319e-31	-11.5289	0	G	-	1
15:78742579:A:G	BIOSQTL	BIOS_eQTL_geneLevel	ENSG00000169684	15	78742579	CHRNA5	G	8.73741e-15	-7.75622	0	G	-	1
15:78742579:A:G	BIOSQTL	BIOS_eQTL_geneLevel	ENSG00000169684	15	78742579	CHRNA5	G	1.57823e-19	-9.0391	0	G	-	1
15:78743029:A:G	BIOSQTL	BIOS_eQTL_geneLevel	ENSG00000041357	15	78743029	PSMA4	G	3.01566e-20	-9.2184	0	A	+	1
15:78743029:A:G	BIOSQTL	BIOS_eQTL_geneLevel	ENSG00000080644	15	78743029	CHRNA3	G	4.71344e-05	-4.06929	0.0276246	A	+	1
15:78743029:A:G	BIOSQTL	BIOS_eQTL_geneLevel	ENSG00000169684	15	78743029	CHRNA5	G	4.71344e-05	-4.06929	0.0276246	A	+	1
15:78743029:A:G	BIOSQTL	BIOS_eQTL_geneLevel	ENSG00000169684	15	78743029	CHRNA5	G	2.32895e-08	-5.58545	3.45961e-05	A	+	1
15:78743029:A:G	BIOSQTL	BIOS_eQTL_geneLevel	ENSG00000169684	15	78743029	CHRNA5	G	8.45919e-11	-6.49205	0	A	+	1
15:78744292:A:G	BIOSQTL	BIOS_eQTL_geneLevel	ENSG00000041357	15	78744292	PSMA4	A	9.8313e-20	-9.09068	0	G	+	1
15:78744292:A:G	BIOSQTL	BIOS_eQTL_geneLevel	ENSG00000080644	15	78744292	CHRNA3	A	7.92688e-05	-3.94659	0.0435818	G	+	1
15:78744292:A:G	BIOSQTL	BIOS_eQTL_geneLevel	ENSG00000080644	15	78744292	CHRNA3	A	2.56731e-05	-4.20877	0.0159426	G	+	1
15:78744292:A:G	BIOSQTL	BIOS_eQTL_geneLevel	ENSG00000169684	15	78744292	CHRNA5	A	2.56731e-05	-4.20877	0.0159426	G	+	1
15:78744292:A:G	BIOSQTL	BIOS_eQTL_geneLevel	ENSG00000169684	15	78744292	CHRNA5	A	2.72259e-08	-5.55822	4.02345e-05	G	+	1
15:78744292:A:G	BIOSQTL	BIOS_eQTL_geneLevel	ENSG00000169684	15	78744292	CHRNA5	A	4.1005e-11	-6.60027	0	G	+	1
15:78745343:A:T	BIOSQTL	BIOS_eQTL_geneLevel	ENSG00000041357	15	78745343	PSMA4	T	3.01566e-20	-9.2184	0	A	+	1
15:78745343:A:T	BIOSQTL	BIOS_eQTL_geneLevel	ENSG00000080644	15	78745343	CHRNA3	T	4.71344e-05	-4.06929	0.0276246	A	+	1
15:78745343:A:T	BIOSQTL	BIOS_eQTL_geneLevel	ENSG00000169684	15	78745343	CHRNA5	T	4.71344e-05	-4.06929	0.0276246	A	+	1
15:78745343:A:T	BIOSQTL	BIOS_eQTL_geneLevel	ENSG00000169684	15	78745343	CHRNA5	T	2.32895e-08	-5.58545	3.45961e-05	A	+	1
15:78745343:A:T	BIOSQTL	BIOS_eQTL_geneLevel	ENSG00000169684	15	78745343	CHRNA5	T	8.45919e-11	-6.49205	0	A	+	1
15:78745707:C:T	BIOSQTL	BIOS_eQTL_geneLevel	ENSG00000041357	15	78745707	PSMA4	C	3.01566e-20	-9.2184	0	T	+	1
15:78745707:C:T	BIOSQTL	BIOS_eQTL_geneLevel	ENSG00000080644	15	78745707	CHRNA3	C	4.71344e-05	-4.06929	0.0276246	T	+	1
15:78745707:C:T	BIOSQTL	BIOS_eQTL_geneLevel	ENSG00000169684	15	78745707	CHRNA5	C	4.71344e-05	-4.06929	0.0276246	T	+	1
15:78745707:C:T	BIOSQTL	BIOS_eQTL_geneLevel	ENSG00000169684	15	78745707	CHRNA5	C	2.32895e-08	-5.58545	3.45961e-05	T	+	1
15:78745707:C:T	BIOSQTL	BIOS_eQTL_geneLevel	ENSG00000169684	15	78745707	CHRNA5	C	8.45919e-11	-6.49205	0	T	+	1
15:78750549:A:G	BIOSQTL	BIOS_eQTL_geneLevel	ENSG00000041357	15	78750549	PSMA4	A	2.05897e-50	14.9315	0	A	+	1
15:78750549:A:G	BIOSQTL	BIOS_eQTL_geneLevel	ENSG00000080644	15	78750549	CHRNA3	A	2.45172e-14	-7.62423	0	A	-	1
15:78750549:A:G	BIOSQTL	BIOS_eQTL_geneLevel	ENSG00000080644	15	78750549	CHRNA3	A	2.06433e-19	-9.00967	0	A	-	1
15:78750549:A:G	BIOSQTL	BIOS_eQTL_geneLevel	ENSG00000136381	15	78750549	IREB2	A	8.50742e-06	-4.45197	0.00587057	A	-	1
15:78750549:A:G	BIOSQTL	BIOS_eQTL_geneLevel	ENSG00000169684	15	78750549	CHRNA5	A	6.7257e-31	-11.5579	0	A	-	1
15:78750549:A:G	BIOSQTL	BIOS_eQTL_geneLevel	ENSG00000169684	15	78750549	CHRNA5	A	1.10457e-14	-7.72642	0	A	-	1
15:78750549:A:G	BIOSQTL	BIOS_eQTL_geneLevel	ENSG00000169684	15	78750549	CHRNA5	A	2.06433e-19	-9.00967	0	A	-	1
15:78751961:C:T	BIOSQTL	BIOS_eQTL_geneLevel	ENSG00000041357	15	78751961	PSMA4	C	4.82647e-18	-8.65727	0	T	+	1
15:78751961:C:T	BIOSQTL	BIOS_eQTL_geneLevel	ENSG00000136381	15	78751961	IREB2	C	1.08656e-48	14.6647	0	T	-	1
15:78752114:C:T	BIOSQTL	BIOS_eQTL_geneLevel	ENSG00000041357	15	78752114	PSMA4	C	2.63156e-20	-9.2328	0	T	+	1
15:78752114:C:T	BIOSQTL	BIOS_eQTL_geneLevel	ENSG00000080644	15	78752114	CHRNA3	C	5.00914e-05	-4.05502	0.0291391	T	+	1
15:78752114:C:T	BIOSQTL	BIOS_eQTL_geneLevel	ENSG00000169684	15	78752114	CHRNA5	C	5.00914e-05	-4.05502	0.0291391	T	+	1
15:78752114:C:T	BIOSQTL	BIOS_eQTL_geneLevel	ENSG00000169684	15	78752114	CHRNA5	C	2.15095e-08	-5.59931	3.4654e-05	T	+	1
15:78752114:C:T	BIOSQTL	BIOS_eQTL_geneLevel	ENSG00000169684	15	78752114	CHRNA5	C	8.49295e-11	-6.49155	0	T	+	1
15:78752188:C:G	BIOSQTL	BIOS_eQTL_geneLevel	ENSG00000041357	15	78752188	PSMA4	G	5.88189e-49	14.7064	0	G	+	1
15:78752188:C:G	BIOSQTL	BIOS_eQTL_geneLevel	ENSG00000080644	15	78752188	CHRNA3	G	3.54182e-14	-7.57669	0	G	-	1
15:78752188:C:G	BIOSQTL	BIOS_eQTL_geneLevel	ENSG00000080644	15	78752188	CHRNA3	G	1.62028e-18	-8.781	0	G	-	1
15:78752188:C:G	BIOSQTL	BIOS_eQTL_geneLevel	ENSG00000136381	15	78752188	IREB2	G	3.7823e-06	-4.62285	0.00275709	G	-	1
15:78752188:C:G	BIOSQTL	BIOS_eQTL_geneLevel	ENSG00000169684	15	78752188	CHRNA5	G	8.72765e-31	-11.5356	0	G	-	1
15:78752188:C:G	BIOSQTL	BIOS_eQTL_geneLevel	ENSG00000169684	15	78752188	CHRNA5	G	1.0195e-14	-7.73669	0	G	-	1
15:78752188:C:G	BIOSQTL	BIOS_eQTL_geneLevel	ENSG00000169684	15	78752188	CHRNA5	G	1.62028e-18	-8.781	0	G	-	1
15:78752343:A:G	BIOSQTL	BIOS_eQTL_geneLevel	ENSG00000041357	15	78752343	PSMA4	G	2.63156e-20	-9.2328	0	A	+	1
15:78752343:A:G	BIOSQTL	BIOS_eQTL_geneLevel	ENSG00000080644	15	78752343	CHRNA3	G	5.00914e-05	-4.05502	0.0291391	A	+	1
15:78752343:A:G	BIOSQTL	BIOS_eQTL_geneLevel	ENSG00000169684	15	78752343	CHRNA5	G	5.00914e-05	-4.05502	0.0291391	A	+	1
15:78752343:A:G	BIOSQTL	BIOS_eQTL_geneLevel	ENSG00000169684	15	78752343	CHRNA5	G	2.15095e-08	-5.59931	3.4654e-05	A	+	1
15:78752343:A:G	BIOSQTL	BIOS_eQTL_geneLevel	ENSG00000169684	15	78752343	CHRNA5	G	8.49295e-11	-6.49155	0	A	+	1
15:78754000:A:G	BIOSQTL	BIOS_eQTL_geneLevel	ENSG00000041357	15	78754000	PSMA4	A	6.3869e-18	-8.62534	0	G	+	1
15:78754000:A:G	BIOSQTL	BIOS_eQTL_geneLevel	ENSG00000136381	15	78754000	IREB2	A	1.08336e-48	14.665	0	G	-	1
15:78754102:A:G	BIOSQTL	BIOS_eQTL_geneLevel	ENSG00000041357	15	78754102	PSMA4	G	4.28836e-50	14.8824	0	G	+	1
15:78754102:A:G	BIOSQTL	BIOS_eQTL_geneLevel	ENSG00000080644	15	78754102	CHRNA3	G	1.98803e-14	-7.65139	0	G	-	1
15:78754102:A:G	BIOSQTL	BIOS_eQTL_geneLevel	ENSG00000080644	15	78754102	CHRNA3	G	5.7039e-20	-9.14966	0	G	-	1
15:78754102:A:G	BIOSQTL	BIOS_eQTL_geneLevel	ENSG00000136381	15	78754102	IREB2	G	4.85866e-06	-4.57075	0.00341164	G	-	1
15:78754102:A:G	BIOSQTL	BIOS_eQTL_geneLevel	ENSG00000169684	15	78754102	CHRNA5	G	4.67478e-31	-11.5891	0	G	-	1
15:78754102:A:G	BIOSQTL	BIOS_eQTL_geneLevel	ENSG00000169684	15	78754102	CHRNA5	G	1.04055e-14	-7.73418	0	G	-	1
15:78754102:A:G	BIOSQTL	BIOS_eQTL_geneLevel	ENSG00000169684	15	78754102	CHRNA5	G	5.7039e-20	-9.14966	0	G	-	1
15:78757913:A:C	BIOSQTL	BIOS_eQTL_geneLevel	ENSG00000041357	15	78757913	PSMA4	A	3.02129e-20	-9.21816	0	A	-	1
15:78757913:A:C	BIOSQTL	BIOS_eQTL_geneLevel	ENSG00000080644	15	78757913	CHRNA3	A	5.65892e-05	-4.0265	0.0327011	A	-	1
15:78757913:A:C	BIOSQTL	BIOS_eQTL_geneLevel	ENSG00000169684	15	78757913	CHRNA5	A	5.65892e-05	-4.0265	0.0327011	A	-	1
15:78757913:A:C	BIOSQTL	BIOS_eQTL_geneLevel	ENSG00000169684	15	78757913	CHRNA5	A	1.55122e-08	-5.65562	2.32951e-05	A	-	1
15:78757913:A:C	BIOSQTL	BIOS_eQTL_geneLevel	ENSG00000169684	15	78757913	CHRNA5	A	9.34403e-11	-6.4771	0	A	-	1
15:78759348:C:T	BIOSQTL	BIOS_eQTL_geneLevel	ENSG00000041357	15	78759348	PSMA4	T	1.33992e-20	-9.30482	0	T	-	1
15:78759348:C:T	BIOSQTL	BIOS_eQTL_geneLevel	ENSG00000080644	15	78759348	CHRNA3	T	7.73713e-05	-3.95228	0.042579	T	-	1
15:78759348:C:T	BIOSQTL	BIOS_eQTL_geneLevel	ENSG00000169684	15	78759348	CHRNA5	T	7.73713e-05	-3.95228	0.042579	T	-	1
15:78759348:C:T	BIOSQTL	BIOS_eQTL_geneLevel	ENSG00000169684	15	78759348	CHRNA5	T	4.93047e-08	-5.45377	4.53695e-05	T	-	1
15:78759348:C:T	BIOSQTL	BIOS_eQTL_geneLevel	ENSG00000169684	15	78759348	CHRNA5	T	1.03876e-10	-6.46102	0	T	-	1
15:78760918:A:G	BIOSQTL	BIOS_eQTL_geneLevel	ENSG00000041357	15	78760918	PSMA4	A	5.43737e-18	-8.64373	0	A	-	1
15:78760918:A:G	BIOSQTL	BIOS_eQTL_geneLevel	ENSG00000136381	15	78760918	IREB2	A	8.81364e-49	14.6789	0	A	+	1
15:78762313:A:G	BIOSQTL	BIOS_eQTL_geneLevel	ENSG00000041357	15	78762313	PSMA4	G	3.02129e-20	-9.21816	0	G	-	1
15:78762313:A:G	BIOSQTL	BIOS_eQTL_geneLevel	ENSG00000080644	15	78762313	CHRNA3	G	5.65892e-05	-4.0265	0.0327011	G	-	1
15:78762313:A:G	BIOSQTL	BIOS_eQTL_geneLevel	ENSG00000169684	15	78762313	CHRNA5	G	5.65892e-05	-4.0265	0.0327011	G	-	1
15:78762313:A:G	BIOSQTL	BIOS_eQTL_geneLevel	ENSG00000169684	15	78762313	CHRNA5	G	1.55122e-08	-5.65562	2.32951e-05	G	-	1
15:78762313:A:G	BIOSQTL	BIOS_eQTL_geneLevel	ENSG00000169684	15	78762313	CHRNA5	G	9.34403e-11	-6.4771	0	G	-	1
15:78763617:C:T	BIOSQTL	BIOS_eQTL_geneLevel	ENSG00000041357	15	78763617	PSMA4	T	3.02129e-20	-9.21816	0	T	-	1
15:78763617:C:T	BIOSQTL	BIOS_eQTL_geneLevel	ENSG00000080644	15	78763617	CHRNA3	T	5.65892e-05	-4.0265	0.0327011	T	-	1
15:78763617:C:T	BIOSQTL	BIOS_eQTL_geneLevel	ENSG00000169684	15	78763617	CHRNA5	T	5.65892e-05	-4.0265	0.0327011	T	-	1
15:78763617:C:T	BIOSQTL	BIOS_eQTL_geneLevel	ENSG00000169684	15	78763617	CHRNA5	T	1.55122e-08	-5.65562	2.32951e-05	T	-	1
15:78763617:C:T	BIOSQTL	BIOS_eQTL_geneLevel	ENSG00000169684	15	78763617	CHRNA5	T	9.34403e-11	-6.4771	0	T	-	1
15:78765122:G:T	BIOSQTL	BIOS_eQTL_geneLevel	ENSG00000041357	15	78765122	PSMA4	T	6.7886e-51	15.0053	0	T	+	1
15:78765122:G:T	BIOSQTL	BIOS_eQTL_geneLevel	ENSG00000080644	15	78765122	CHRNA3	T	1.53476e-14	-7.6845	0	T	-	1
15:78765122:G:T	BIOSQTL	BIOS_eQTL_geneLevel	ENSG00000080644	15	78765122	CHRNA3	T	1.29735e-19	-9.06055	0	T	-	1
15:78765122:G:T	BIOSQTL	BIOS_eQTL_geneLevel	ENSG00000136381	15	78765122	IREB2	T	4.11278e-06	-4.60544	0.00294383	T	-	1
15:78765122:G:T	BIOSQTL	BIOS_eQTL_geneLevel	ENSG00000169684	15	78765122	CHRNA5	T	3.55635e-31	-11.6125	0	T	-	1
15:78765122:G:T	BIOSQTL	BIOS_eQTL_geneLevel	ENSG00000169684	15	78765122	CHRNA5	T	8.56017e-15	-7.75882	0	T	-	1
15:78765122:G:T	BIOSQTL	BIOS_eQTL_geneLevel	ENSG00000169684	15	78765122	CHRNA5	T	1.29735e-19	-9.06055	0	T	-	1
15:78765290:G:T	BIOSQTL	BIOS_eQTL_geneLevel	ENSG00000041357	15	78765290	PSMA4	T	5.43737e-18	-8.64373	0	G	+	1
15:78765290:G:T	BIOSQTL	BIOS_eQTL_geneLevel	ENSG00000136381	15	78765290	IREB2	T	8.81364e-49	14.6789	0	G	-	1
15:78766194:A:T	BIOSQTL	BIOS_eQTL_geneLevel	ENSG00000041357	15	78766194	PSMA4	A	1.51087e-09	6.0434	6.12145e-06	NA	NA	1
15:78766194:A:T	BIOSQTL	BIOS_eQTL_geneLevel	ENSG00000136381	15	78766194	IREB2	A	7.66192e-23	-9.8388	0	NA	NA	1
15:78766250:A:G	BIOSQTL	BIOS_eQTL_geneLevel	ENSG00000041357	15	78766250	PSMA4	G	3.63181e-49	14.7389	0	G	+	1
15:78766250:A:G	BIOSQTL	BIOS_eQTL_geneLevel	ENSG00000080644	15	78766250	CHRNA3	G	1.21362e-14	-7.71444	0	G	-	1
15:78766250:A:G	BIOSQTL	BIOS_eQTL_geneLevel	ENSG00000080644	15	78766250	CHRNA3	G	9.36841e-19	-8.84228	0	G	-	1
15:78766250:A:G	BIOSQTL	BIOS_eQTL_geneLevel	ENSG00000136381	15	78766250	IREB2	G	3.34196e-06	-4.64841	0.00246084	G	-	1
15:78766250:A:G	BIOSQTL	BIOS_eQTL_geneLevel	ENSG00000169684	15	78766250	CHRNA5	G	2.56207e-31	-11.6405	0	G	-	1
15:78766250:A:G	BIOSQTL	BIOS_eQTL_geneLevel	ENSG00000169684	15	78766250	CHRNA5	G	4.43426e-15	-7.84188	0	G	-	1
15:78766250:A:G	BIOSQTL	BIOS_eQTL_geneLevel	ENSG00000169684	15	78766250	CHRNA5	G	9.36841e-19	-8.84228	0	G	-	1
15:78766629:C:T	BIOSQTL	BIOS_eQTL_geneLevel	ENSG00000041357	15	78766629	PSMA4	C	5.43737e-18	-8.64373	0	T	+	1
15:78766629:C:T	BIOSQTL	BIOS_eQTL_geneLevel	ENSG00000136381	15	78766629	IREB2	C	8.81364e-49	14.6789	0	T	-	1
15:78767346:A:G	BIOSQTL	BIOS_eQTL_geneLevel	ENSG00000041357	15	78767346	PSMA4	G	1.19707e-16	-8.28334	0	NA	NA	1
15:78767346:A:G	BIOSQTL	BIOS_eQTL_geneLevel	ENSG00000136381	15	78767346	IREB2	G	1.14773e-49	14.8166	0	NA	NA	1
15:78767850:C:T	BIOSQTL	BIOS_eQTL_geneLevel	ENSG00000041357	15	78767850	PSMA4	C	5.43737e-18	-8.64373	0	T	+	1
15:78767850:C:T	BIOSQTL	BIOS_eQTL_geneLevel	ENSG00000136381	15	78767850	IREB2	C	8.81364e-49	14.6789	0	T	-	1
15:78768871:C:G	BIOSQTL	BIOS_eQTL_geneLevel	ENSG00000041357	15	78768871	PSMA4	C	5.43737e-18	-8.64373	0	G	+	1
15:78768871:C:G	BIOSQTL	BIOS_eQTL_geneLevel	ENSG00000136381	15	78768871	IREB2	C	8.81364e-49	14.6789	0	G	-	1
15:78769130:A:G	BIOSQTL	BIOS_eQTL_geneLevel	ENSG00000041357	15	78769130	PSMA4	A	5.43737e-18	-8.64373	0	G	+	1
15:78769130:A:G	BIOSQTL	BIOS_eQTL_geneLevel	ENSG00000136381	15	78769130	IREB2	A	8.81364e-49	14.6789	0	G	-	1
15:78771546:C:T	BIOSQTL	BIOS_eQTL_geneLevel	ENSG00000041357	15	78771546	PSMA4	T	3.02129e-20	-9.21816	0	T	-	1
15:78771546:C:T	BIOSQTL	BIOS_eQTL_geneLevel	ENSG00000080644	15	78771546	CHRNA3	T	5.65892e-05	-4.0265	0.0327011	T	-	1
15:78771546:C:T	BIOSQTL	BIOS_eQTL_geneLevel	ENSG00000169684	15	78771546	CHRNA5	T	5.65892e-05	-4.0265	0.0327011	T	-	1
15:78771546:C:T	BIOSQTL	BIOS_eQTL_geneLevel	ENSG00000169684	15	78771546	CHRNA5	T	1.55122e-08	-5.65562	2.32951e-05	T	-	1
15:78771546:C:T	BIOSQTL	BIOS_eQTL_geneLevel	ENSG00000169684	15	78771546	CHRNA5	T	8.51553e-11	-6.49101	0	T	-	1
15:78772676:A:G	BIOSQTL	BIOS_eQTL_geneLevel	ENSG00000041357	15	78772676	PSMA4	G	2.90818e-49	14.7538	0	G	+	1
15:78772676:A:G	BIOSQTL	BIOS_eQTL_geneLevel	ENSG00000080644	15	78772676	CHRNA3	G	1.71461e-14	-7.67031	0	G	-	1
15:78772676:A:G	BIOSQTL	BIOS_eQTL_geneLevel	ENSG00000080644	15	78772676	CHRNA3	G	6.08893e-19	-8.89035	0	G	-	1
15:78772676:A:G	BIOSQTL	BIOS_eQTL_geneLevel	ENSG00000136381	15	78772676	IREB2	G	2.31023e-06	-4.72409	0.00178316	G	-	1
15:78772676:A:G	BIOSQTL	BIOS_eQTL_geneLevel	ENSG00000169684	15	78772676	CHRNA5	G	2.04522e-31	-11.6597	0	G	-	1
15:78772676:A:G	BIOSQTL	BIOS_eQTL_geneLevel	ENSG00000169684	15	78772676	CHRNA5	G	5.41831e-15	-7.81676	0	G	-	1
15:78772676:A:G	BIOSQTL	BIOS_eQTL_geneLevel	ENSG00000169684	15	78772676	CHRNA5	G	6.08893e-19	-8.89035	0	G	-	1
15:78772806:C:T	BIOSQTL	BIOS_eQTL_geneLevel	ENSG00000041357	15	78772806	PSMA4	T	3.4551e-20	-9.20364	0	T	-	1
15:78772806:C:T	BIOSQTL	BIOS_eQTL_geneLevel	ENSG00000080644	15	78772806	CHRNA3	T	5.33601e-05	-4.0402	0.0308071	T	-	1
15:78772806:C:T	BIOSQTL	BIOS_eQTL_geneLevel	ENSG00000169684	15	78772806	CHRNA5	T	5.33601e-05	-4.0402	0.0308071	T	-	1
15:78772806:C:T	BIOSQTL	BIOS_eQTL_geneLevel	ENSG00000169684	15	78772806	CHRNA5	T	1.55122e-08	-5.65562	2.32951e-05	T	-	1
15:78772806:C:T	BIOSQTL	BIOS_eQTL_geneLevel	ENSG00000169684	15	78772806	CHRNA5	T	9.36882e-11	-6.47662	0	T	-	1
15:78774271:C:T	BIOSQTL	BIOS_eQTL_geneLevel	ENSG00000041357	15	78774271	PSMA4	C	6.16746e-18	-8.62928	0	T	+	1
15:78774271:C:T	BIOSQTL	BIOS_eQTL_geneLevel	ENSG00000136381	15	78774271	IREB2	C	8.81364e-49	14.6789	0	T	-	1
15:78774374:A:G	BIOSQTL	BIOS_eQTL_geneLevel	ENSG00000041357	15	78774374	PSMA4	A	6.16746e-18	-8.62928	0	G	+	1
15:78774374:A:G	BIOSQTL	BIOS_eQTL_geneLevel	ENSG00000136381	15	78774374	IREB2	A	8.81364e-49	14.6789	0	G	-	1
15:78774676:A:G	BIOSQTL	BIOS_eQTL_geneLevel	ENSG00000041357	15	78774676	PSMA4	G	3.02129e-20	-9.21805	0	G	-	1
15:78774676:A:G	BIOSQTL	BIOS_eQTL_geneLevel	ENSG00000080644	15	78774676	CHRNA3	G	5.33601e-05	-4.0402	0.0308071	G	-	1
15:78774676:A:G	BIOSQTL	BIOS_eQTL_geneLevel	ENSG00000169684	15	78774676	CHRNA5	G	5.33601e-05	-4.0402	0.0308071	G	-	1
15:78774676:A:G	BIOSQTL	BIOS_eQTL_geneLevel	ENSG00000169684	15	78774676	CHRNA5	G	1.68282e-08	-5.64175	2.3245e-05	G	-	1
15:78774676:A:G	BIOSQTL	BIOS_eQTL_geneLevel	ENSG00000169684	15	78774676	CHRNA5	G	8.54952e-11	-6.49053	0	G	-	1
15:78776456:C:T	BIOSQTL	BIOS_eQTL_geneLevel	ENSG00000041357	15	78776456	PSMA4	T	3.02129e-20	-9.21805	0	T	-	1
15:78776456:C:T	BIOSQTL	BIOS_eQTL_geneLevel	ENSG00000080644	15	78776456	CHRNA3	T	5.33601e-05	-4.0402	0.0308071	T	-	1
15:78776456:C:T	BIOSQTL	BIOS_eQTL_geneLevel	ENSG00000169684	15	78776456	CHRNA5	T	5.33601e-05	-4.0402	0.0308071	T	-	1
15:78776456:C:T	BIOSQTL	BIOS_eQTL_geneLevel	ENSG00000169684	15	78776456	CHRNA5	T	1.68282e-08	-5.64175	2.3245e-05	T	-	1
15:78776456:C:T	BIOSQTL	BIOS_eQTL_geneLevel	ENSG00000169684	15	78776456	CHRNA5	T	8.54952e-11	-6.49053	0	T	-	1
15:78778953:A:G	BIOSQTL	BIOS_eQTL_geneLevel	ENSG00000041357	15	78778953	PSMA4	A	8.3758e-21	-9.35479	0	G	+	1
15:78778953:A:G	BIOSQTL	BIOS_eQTL_geneLevel	ENSG00000136381	15	78778953	IREB2	A	1.88747e-38	12.9669	0	G	-	1
15:78779384:C:T	BIOSQTL	BIOS_eQTL_geneLevel	ENSG00000041357	15	78779384	PSMA4	C	6.16746e-18	-8.62928	0	T	+	1
15:78779384:C:T	BIOSQTL	BIOS_eQTL_geneLevel	ENSG00000136381	15	78779384	IREB2	C	8.81364e-49	14.6789	0	T	-	1
15:78779510:A:T	BIOSQTL	BIOS_eQTL_geneLevel	ENSG00000041357	15	78779510	PSMA4	T	6.16746e-18	-8.62928	0	A	+	1
15:78779510:A:T	BIOSQTL	BIOS_eQTL_geneLevel	ENSG00000136381	15	78779510	IREB2	T	7.12672e-49	14.6932	0	A	-	1
15:78779801:C:T	BIOSQTL	BIOS_eQTL_geneLevel	ENSG00000041357	15	78779801	PSMA4	T	3.02129e-20	-9.21805	0	T	-	1
15:78779801:C:T	BIOSQTL	BIOS_eQTL_geneLevel	ENSG00000080644	15	78779801	CHRNA3	T	5.33601e-05	-4.0402	0.0308071	T	-	1
15:78779801:C:T	BIOSQTL	BIOS_eQTL_geneLevel	ENSG00000169684	15	78779801	CHRNA5	T	5.33601e-05	-4.0402	0.0308071	T	-	1
15:78779801:C:T	BIOSQTL	BIOS_eQTL_geneLevel	ENSG00000169684	15	78779801	CHRNA5	T	1.68282e-08	-5.64175	2.3245e-05	T	-	1
15:78779801:C:T	BIOSQTL	BIOS_eQTL_geneLevel	ENSG00000169684	15	78779801	CHRNA5	T	8.54952e-11	-6.49053	0	T	-	1
15:78781687:A:G	BIOSQTL	BIOS_eQTL_geneLevel	ENSG00000041357	15	78781687	PSMA4	A	3.02129e-20	-9.21805	0	A	-	1
15:78781687:A:G	BIOSQTL	BIOS_eQTL_geneLevel	ENSG00000080644	15	78781687	CHRNA3	A	5.33601e-05	-4.0402	0.0308071	A	-	1
15:78781687:A:G	BIOSQTL	BIOS_eQTL_geneLevel	ENSG00000169684	15	78781687	CHRNA5	A	5.33601e-05	-4.0402	0.0308071	A	-	1
15:78781687:A:G	BIOSQTL	BIOS_eQTL_geneLevel	ENSG00000169684	15	78781687	CHRNA5	A	1.68282e-08	-5.64175	2.3245e-05	A	-	1
15:78781687:A:G	BIOSQTL	BIOS_eQTL_geneLevel	ENSG00000169684	15	78781687	CHRNA5	A	8.54952e-11	-6.49053	0	A	-	1
15:78782095:C:T	BIOSQTL	BIOS_eQTL_geneLevel	ENSG00000041357	15	78782095	PSMA4	C	6.16746e-18	-8.62928	0	T	+	1
15:78782095:C:T	BIOSQTL	BIOS_eQTL_geneLevel	ENSG00000136381	15	78782095	IREB2	C	8.81364e-49	14.6789	0	T	-	1
15:78783277:A:G	BIOSQTL	BIOS_eQTL_geneLevel	ENSG00000041357	15	78783277	PSMA4	A	3.10412e-49	14.7494	0	NA	NA	1
15:78783277:A:G	BIOSQTL	BIOS_eQTL_geneLevel	ENSG00000080644	15	78783277	CHRNA3	A	1.52758e-14	-7.68501	0	NA	NA	1
15:78783277:A:G	BIOSQTL	BIOS_eQTL_geneLevel	ENSG00000080644	15	78783277	CHRNA3	A	5.14021e-19	-8.90915	0	NA	NA	1
15:78783277:A:G	BIOSQTL	BIOS_eQTL_geneLevel	ENSG00000136381	15	78783277	IREB2	A	2.31023e-06	-4.72409	0.00178316	NA	NA	1
15:78783277:A:G	BIOSQTL	BIOS_eQTL_geneLevel	ENSG00000169684	15	78783277	CHRNA5	A	1.45427e-31	-11.6887	0	NA	NA	1
15:78783277:A:G	BIOSQTL	BIOS_eQTL_geneLevel	ENSG00000169684	15	78783277	CHRNA5	A	5.41831e-15	-7.81676	0	NA	NA	1
15:78783277:A:G	BIOSQTL	BIOS_eQTL_geneLevel	ENSG00000169684	15	78783277	CHRNA5	A	5.14021e-19	-8.90915	0	NA	NA	1
15:78783683:C:T	BIOSQTL	BIOS_eQTL_geneLevel	ENSG00000041357	15	78783683	PSMA4	T	3.02129e-20	-9.21805	0	T	-	1
15:78783683:C:T	BIOSQTL	BIOS_eQTL_geneLevel	ENSG00000080644	15	78783683	CHRNA3	T	5.33601e-05	-4.0402	0.0308071	T	-	1
15:78783683:C:T	BIOSQTL	BIOS_eQTL_geneLevel	ENSG00000169684	15	78783683	CHRNA5	T	5.33601e-05	-4.0402	0.0308071	T	-	1
15:78783683:C:T	BIOSQTL	BIOS_eQTL_geneLevel	ENSG00000169684	15	78783683	CHRNA5	T	1.68282e-08	-5.64175	2.3245e-05	T	-	1
15:78783683:C:T	BIOSQTL	BIOS_eQTL_geneLevel	ENSG00000169684	15	78783683	CHRNA5	T	8.54952e-11	-6.49053	0	T	-	1
15:78789223:A:G	BIOSQTL	BIOS_eQTL_geneLevel	ENSG00000041357	15	78789223	PSMA4	G	6.16746e-18	-8.62928	0	A	+	1
15:78789223:A:G	BIOSQTL	BIOS_eQTL_geneLevel	ENSG00000136381	15	78789223	IREB2	G	8.81364e-49	14.6789	0	A	-	1
15:78789488:C:T	BIOSQTL	BIOS_eQTL_geneLevel	ENSG00000041357	15	78789488	PSMA4	C	1.89591e-17	-8.49983	0	T	+	1
15:78789488:C:T	BIOSQTL	BIOS_eQTL_geneLevel	ENSG00000136381	15	78789488	IREB2	C	2.69544e-48	14.6029	0	T	-	1
15:78792398:C:T	BIOSQTL	BIOS_eQTL_geneLevel	ENSG00000041357	15	78792398	PSMA4	T	6.16746e-18	-8.62928	0	C	+	1
15:78792398:C:T	BIOSQTL	BIOS_eQTL_geneLevel	ENSG00000136381	15	78792398	IREB2	T	1.08976e-48	14.6645	0	C	-	1
15:78792439:A:G	BIOSQTL	BIOS_eQTL_geneLevel	ENSG00000041357	15	78792439	PSMA4	A	3.02129e-20	-9.21805	0	A	-	1
15:78792439:A:G	BIOSQTL	BIOS_eQTL_geneLevel	ENSG00000080644	15	78792439	CHRNA3	A	5.33601e-05	-4.0402	0.0308071	A	-	1
15:78792439:A:G	BIOSQTL	BIOS_eQTL_geneLevel	ENSG00000169684	15	78792439	CHRNA5	A	5.33601e-05	-4.0402	0.0308071	A	-	1
15:78792439:A:G	BIOSQTL	BIOS_eQTL_geneLevel	ENSG00000169684	15	78792439	CHRNA5	A	1.68282e-08	-5.64175	2.3245e-05	A	-	1
15:78792439:A:G	BIOSQTL	BIOS_eQTL_geneLevel	ENSG00000169684	15	78792439	CHRNA5	A	8.54952e-11	-6.49053	0	A	-	1
15:78792527:C:T	BIOSQTL	BIOS_eQTL_geneLevel	ENSG00000041357	15	78792527	PSMA4	C	4.80956e-18	-8.65772	0	C	-	1
15:78792527:C:T	BIOSQTL	BIOS_eQTL_geneLevel	ENSG00000136381	15	78792527	IREB2	C	2.27775e-47	14.4568	0	C	+	1
15:78793921:C:T	BIOSQTL	BIOS_eQTL_geneLevel	ENSG00000041357	15	78793921	PSMA4	C	6.16746e-18	-8.62928	0	T	+	1
15:78793921:C:T	BIOSQTL	BIOS_eQTL_geneLevel	ENSG00000136381	15	78793921	IREB2	C	1.08976e-48	14.6645	0	T	-	1
15:78796104:C:T	BIOSQTL	BIOS_eQTL_geneLevel	ENSG00000041357	15	78796104	PSMA4	C	6.16746e-18	-8.62928	0	T	+	1
15:78796104:C:T	BIOSQTL	BIOS_eQTL_geneLevel	ENSG00000136381	15	78796104	IREB2	C	7.53783e-49	14.6894	0	T	-	1
15:78796732:C:T	BIOSQTL	BIOS_eQTL_geneLevel	ENSG00000041357	15	78796732	PSMA4	T	2.44661e-20	-9.2407	0	T	-	1
15:78796732:C:T	BIOSQTL	BIOS_eQTL_geneLevel	ENSG00000080644	15	78796732	CHRNA3	T	4.4458e-05	-4.08297	0.0262312	T	-	1
15:78796732:C:T	BIOSQTL	BIOS_eQTL_geneLevel	ENSG00000169684	15	78796732	CHRNA5	T	4.4458e-05	-4.08297	0.0262312	T	-	1
15:78796732:C:T	BIOSQTL	BIOS_eQTL_geneLevel	ENSG00000169684	15	78796732	CHRNA5	T	1.03678e-08	-5.72456	1.76201e-05	T	-	1
15:78796732:C:T	BIOSQTL	BIOS_eQTL_geneLevel	ENSG00000169684	15	78796732	CHRNA5	T	3.92716e-11	-6.60663	0	T	-	1
15:78797463:A:T	BIOSQTL	BIOS_eQTL_geneLevel	ENSG00000041357	15	78797463	PSMA4	A	1.60154e-12	-7.06529	0	A	-	1
15:78797463:A:T	BIOSQTL	BIOS_eQTL_geneLevel	ENSG00000169684	15	78797463	CHRNA5	A	2.31292e-08	-5.58677	3.45981e-05	A	-	1
15:78797463:A:T	BIOSQTL	BIOS_eQTL_geneLevel	ENSG00000169684	15	78797463	CHRNA5	A	4.58757e-10	-6.23255	0	A	-	1
15:78801394:A:C	BIOSQTL	BIOS_eQTL_geneLevel	ENSG00000041357	15	78801394	PSMA4	C	6.01274e-55	15.6123	0	C	+	1
15:78801394:A:C	BIOSQTL	BIOS_eQTL_geneLevel	ENSG00000080644	15	78801394	CHRNA3	C	6.38177e-16	-8.08174	0	C	-	1
15:78801394:A:C	BIOSQTL	BIOS_eQTL_geneLevel	ENSG00000080644	15	78801394	CHRNA3	C	3.3369e-21	-9.45144	0	C	-	1
15:78801394:A:C	BIOSQTL	BIOS_eQTL_geneLevel	ENSG00000169684	15	78801394	CHRNA5	C	8.43581e-39	-13.0283	0	C	-	1
15:78801394:A:C	BIOSQTL	BIOS_eQTL_geneLevel	ENSG00000169684	15	78801394	CHRNA5	C	1.61916e-19	-9.03625	0	C	-	1
15:78801394:A:C	BIOSQTL	BIOS_eQTL_geneLevel	ENSG00000169684	15	78801394	CHRNA5	C	3.3369e-21	-9.45144	0	C	-	1
15:78801394:A:C	BIOSQTL	BIOS_eQTL_geneLevel	ENSG00000188266	15	78801394	HYKK	C	3.35169e-06	-4.64781	0.00246577	C	-	1
15:78802869:C:T	BIOSQTL	BIOS_eQTL_geneLevel	ENSG00000041357	15	78802869	PSMA4	C	2.44292e-57	15.9596	0	T	-	1
15:78802869:C:T	BIOSQTL	BIOS_eQTL_geneLevel	ENSG00000080644	15	78802869	CHRNA3	C	9.06754e-17	-8.3164	0	T	+	1
15:78802869:C:T	BIOSQTL	BIOS_eQTL_geneLevel	ENSG00000080644	15	78802869	CHRNA3	C	1.11476e-22	-9.801	0	T	+	1
15:78802869:C:T	BIOSQTL	BIOS_eQTL_geneLevel	ENSG00000169684	15	78802869	CHRNA5	C	7.69623e-39	-13.0352	0	T	+	1
15:78802869:C:T	BIOSQTL	BIOS_eQTL_geneLevel	ENSG00000169684	15	78802869	CHRNA5	C	9.44125e-20	-9.09502	0	T	+	1
15:78802869:C:T	BIOSQTL	BIOS_eQTL_geneLevel	ENSG00000169684	15	78802869	CHRNA5	C	1.11476e-22	-9.801	0	T	+	1
15:78802869:C:T	BIOSQTL	BIOS_eQTL_geneLevel	ENSG00000188266	15	78802869	HYKK	C	1.65783e-05	-4.30647	0.0108049	T	+	1
15:78803057:C:T	BIOSQTL	BIOS_eQTL_geneLevel	ENSG00000041357	15	78803057	PSMA4	T	1.23014e-19	-9.06635	0	T	-	1
15:78803057:C:T	BIOSQTL	BIOS_eQTL_geneLevel	ENSG00000080644	15	78803057	CHRNA3	T	1.52753e-06	-4.80751	0.00127966	T	-	1
15:78803057:C:T	BIOSQTL	BIOS_eQTL_geneLevel	ENSG00000080644	15	78803057	CHRNA3	T	4.65532e-07	-5.03984	0.000337205	T	-	1
15:78803057:C:T	BIOSQTL	BIOS_eQTL_geneLevel	ENSG00000169684	15	78803057	CHRNA5	T	1.52753e-06	-4.80751	0.00127966	T	-	1
15:78803057:C:T	BIOSQTL	BIOS_eQTL_geneLevel	ENSG00000169684	15	78803057	CHRNA5	T	8.26943e-12	-6.83374	0	T	-	1
15:78803057:C:T	BIOSQTL	BIOS_eQTL_geneLevel	ENSG00000169684	15	78803057	CHRNA5	T	8.12531e-17	-8.32927	0	T	-	1
15:78806023:C:T	BIOSQTL	BIOS_eQTL_geneLevel	ENSG00000041357	15	78806023	PSMA4	C	4.44927e-54	15.4841	0	C	+	1
15:78806023:C:T	BIOSQTL	BIOS_eQTL_geneLevel	ENSG00000080644	15	78806023	CHRNA3	C	3.68771e-16	-8.14827	0	C	-	1
15:78806023:C:T	BIOSQTL	BIOS_eQTL_geneLevel	ENSG00000080644	15	78806023	CHRNA3	C	1.67604e-21	-9.52338	0	C	-	1
15:78806023:C:T	BIOSQTL	BIOS_eQTL_geneLevel	ENSG00000169684	15	78806023	CHRNA5	C	2.42415e-38	-12.9476	0	C	-	1
15:78806023:C:T	BIOSQTL	BIOS_eQTL_geneLevel	ENSG00000169684	15	78806023	CHRNA5	C	8.5318e-20	-9.10604	0	C	-	1
15:78806023:C:T	BIOSQTL	BIOS_eQTL_geneLevel	ENSG00000169684	15	78806023	CHRNA5	C	1.67604e-21	-9.52338	0	C	-	1
15:78806023:C:T	BIOSQTL	BIOS_eQTL_geneLevel	ENSG00000188266	15	78806023	HYKK	C	3.60753e-06	-4.63266	0.00262601	C	-	1
15:78807872:C:T	BIOSQTL	BIOS_eQTL_geneLevel	ENSG00000041357	15	78807872	PSMA4	T	1.60442e-19	-9.03736	0	T	-	1
15:78807872:C:T	BIOSQTL	BIOS_eQTL_geneLevel	ENSG00000080644	15	78807872	CHRNA3	T	1.67281e-06	-4.78924	0.00135784	T	-	1
15:78807872:C:T	BIOSQTL	BIOS_eQTL_geneLevel	ENSG00000080644	15	78807872	CHRNA3	T	4.01174e-07	-5.06833	0.000290307	T	-	1
15:78807872:C:T	BIOSQTL	BIOS_eQTL_geneLevel	ENSG00000169684	15	78807872	CHRNA5	T	1.67281e-06	-4.78924	0.00135784	T	-	1
15:78807872:C:T	BIOSQTL	BIOS_eQTL_geneLevel	ENSG00000169684	15	78807872	CHRNA5	T	6.85719e-12	-6.86059	0	T	-	1
15:78807872:C:T	BIOSQTL	BIOS_eQTL_geneLevel	ENSG00000169684	15	78807872	CHRNA5	T	4.82024e-17	-8.39083	0	T	-	1
15:78812098:A:G	BIOSQTL	BIOS_eQTL_geneLevel	ENSG00000041357	15	78812098	PSMA4	A	1.89814e-19	-9.01896	0	A	-	1
15:78812098:A:G	BIOSQTL	BIOS_eQTL_geneLevel	ENSG00000080644	15	78812098	CHRNA3	A	1.70647e-06	-4.78525	0.00136244	A	-	1
15:78812098:A:G	BIOSQTL	BIOS_eQTL_geneLevel	ENSG00000080644	15	78812098	CHRNA3	A	3.20119e-07	-5.11104	0.000237979	A	-	1
15:78812098:A:G	BIOSQTL	BIOS_eQTL_geneLevel	ENSG00000169684	15	78812098	CHRNA5	A	1.70647e-06	-4.78525	0.00136244	A	-	1
15:78812098:A:G	BIOSQTL	BIOS_eQTL_geneLevel	ENSG00000169684	15	78812098	CHRNA5	A	4.32906e-12	-6.92593	0	A	-	1
15:78812098:A:G	BIOSQTL	BIOS_eQTL_geneLevel	ENSG00000169684	15	78812098	CHRNA5	A	3.22262e-17	-8.43803	0	A	-	1
15:78812329:C:T	BIOSQTL	BIOS_eQTL_geneLevel	ENSG00000041357	15	78812329	PSMA4	C	1.89814e-19	-9.01896	0	C	-	1
15:78812329:C:T	BIOSQTL	BIOS_eQTL_geneLevel	ENSG00000080644	15	78812329	CHRNA3	C	1.70647e-06	-4.78525	0.00136244	C	-	1
15:78812329:C:T	BIOSQTL	BIOS_eQTL_geneLevel	ENSG00000080644	15	78812329	CHRNA3	C	3.20119e-07	-5.11104	0.000237979	C	-	1
15:78812329:C:T	BIOSQTL	BIOS_eQTL_geneLevel	ENSG00000169684	15	78812329	CHRNA5	C	1.70647e-06	-4.78525	0.00136244	C	-	1
15:78812329:C:T	BIOSQTL	BIOS_eQTL_geneLevel	ENSG00000169684	15	78812329	CHRNA5	C	4.32906e-12	-6.92593	0	C	-	1
15:78812329:C:T	BIOSQTL	BIOS_eQTL_geneLevel	ENSG00000169684	15	78812329	CHRNA5	C	3.22262e-17	-8.43803	0	C	-	1
15:78813155:A:G	BIOSQTL	BIOS_eQTL_geneLevel	ENSG00000041357	15	78813155	PSMA4	A	8.76086e-56	15.7347	0	NA	NA	1
15:78813155:A:G	BIOSQTL	BIOS_eQTL_geneLevel	ENSG00000080644	15	78813155	CHRNA3	A	5.24859e-16	-8.10545	0	NA	NA	1
15:78813155:A:G	BIOSQTL	BIOS_eQTL_geneLevel	ENSG00000080644	15	78813155	CHRNA3	A	2.35442e-22	-9.72512	0	NA	NA	1
15:78813155:A:G	BIOSQTL	BIOS_eQTL_geneLevel	ENSG00000169684	15	78813155	CHRNA5	A	1.17023e-38	-13.0034	0	NA	NA	1
15:78813155:A:G	BIOSQTL	BIOS_eQTL_geneLevel	ENSG00000169684	15	78813155	CHRNA5	A	3.8993e-20	-9.19069	0	NA	NA	1
15:78813155:A:G	BIOSQTL	BIOS_eQTL_geneLevel	ENSG00000169684	15	78813155	CHRNA5	A	2.35442e-22	-9.72512	0	NA	NA	1
15:78813155:A:G	BIOSQTL	BIOS_eQTL_geneLevel	ENSG00000188266	15	78813155	HYKK	A	4.01895e-06	-4.61038	0.00288153	NA	NA	1
15:78814046:A:G	BIOSQTL	BIOS_eQTL_geneLevel	ENSG00000041357	15	78814046	PSMA4	G	8.76086e-56	15.7347	0	A	-	1
15:78814046:A:G	BIOSQTL	BIOS_eQTL_geneLevel	ENSG00000080644	15	78814046	CHRNA3	G	5.24859e-16	-8.10545	0	A	+	1
15:78814046:A:G	BIOSQTL	BIOS_eQTL_geneLevel	ENSG00000080644	15	78814046	CHRNA3	G	2.03955e-22	-9.73979	0	A	+	1
15:78814046:A:G	BIOSQTL	BIOS_eQTL_geneLevel	ENSG00000169684	15	78814046	CHRNA5	G	9.61648e-39	-13.0184	0	A	+	1
15:78814046:A:G	BIOSQTL	BIOS_eQTL_geneLevel	ENSG00000169684	15	78814046	CHRNA5	G	4.45744e-20	-9.1762	0	A	+	1
15:78814046:A:G	BIOSQTL	BIOS_eQTL_geneLevel	ENSG00000169684	15	78814046	CHRNA5	G	2.03955e-22	-9.73979	0	A	+	1
15:78814046:A:G	BIOSQTL	BIOS_eQTL_geneLevel	ENSG00000188266	15	78814046	HYKK	G	4.01895e-06	-4.61038	0.00288153	A	+	1
15:78814389:C:T	BIOSQTL	BIOS_eQTL_geneLevel	ENSG00000041357	15	78814389	PSMA4	T	1.89468e-19	-9.01904	0	T	-	1
15:78814389:C:T	BIOSQTL	BIOS_eQTL_geneLevel	ENSG00000080644	15	78814389	CHRNA3	T	1.5946e-06	-4.79895	0.0013245	T	-	1
15:78814389:C:T	BIOSQTL	BIOS_eQTL_geneLevel	ENSG00000080644	15	78814389	CHRNA3	T	2.96907e-07	-5.12525	0.000216873	T	-	1
15:78814389:C:T	BIOSQTL	BIOS_eQTL_geneLevel	ENSG00000169684	15	78814389	CHRNA5	T	1.5946e-06	-4.79895	0.0013245	T	-	1
15:78814389:C:T	BIOSQTL	BIOS_eQTL_geneLevel	ENSG00000169684	15	78814389	CHRNA5	T	3.43183e-12	-6.95878	0	T	-	1
15:78814389:C:T	BIOSQTL	BIOS_eQTL_geneLevel	ENSG00000169684	15	78814389	CHRNA5	T	3.22262e-17	-8.43803	0	T	-	1
15:78814567:A:G	BIOSQTL	BIOS_eQTL_geneLevel	ENSG00000041357	15	78814567	PSMA4	G	1.89468e-19	-9.01904	0	G	-	1
15:78814567:A:G	BIOSQTL	BIOS_eQTL_geneLevel	ENSG00000080644	15	78814567	CHRNA3	G	1.5946e-06	-4.79895	0.0013245	G	-	1
15:78814567:A:G	BIOSQTL	BIOS_eQTL_geneLevel	ENSG00000080644	15	78814567	CHRNA3	G	2.96907e-07	-5.12525	0.000216873	G	-	1
15:78814567:A:G	BIOSQTL	BIOS_eQTL_geneLevel	ENSG00000169684	15	78814567	CHRNA5	G	1.5946e-06	-4.79895	0.0013245	G	-	1
15:78814567:A:G	BIOSQTL	BIOS_eQTL_geneLevel	ENSG00000169684	15	78814567	CHRNA5	G	3.43183e-12	-6.95878	0	G	-	1
15:78814567:A:G	BIOSQTL	BIOS_eQTL_geneLevel	ENSG00000169684	15	78814567	CHRNA5	G	3.22262e-17	-8.43803	0	G	-	1
15:78814681:A:G	BIOSQTL	BIOS_eQTL_geneLevel	ENSG00000041357	15	78814681	PSMA4	G	1.89468e-19	-9.01904	0	G	-	1
15:78814681:A:G	BIOSQTL	BIOS_eQTL_geneLevel	ENSG00000080644	15	78814681	CHRNA3	G	1.5946e-06	-4.79895	0.0013245	G	-	1
15:78814681:A:G	BIOSQTL	BIOS_eQTL_geneLevel	ENSG00000080644	15	78814681	CHRNA3	G	2.96907e-07	-5.12525	0.000216873	G	-	1
15:78814681:A:G	BIOSQTL	BIOS_eQTL_geneLevel	ENSG00000169684	15	78814681	CHRNA5	G	1.5946e-06	-4.79895	0.0013245	G	-	1
15:78814681:A:G	BIOSQTL	BIOS_eQTL_geneLevel	ENSG00000169684	15	78814681	CHRNA5	G	3.43183e-12	-6.95878	0	G	-	1
15:78814681:A:G	BIOSQTL	BIOS_eQTL_geneLevel	ENSG00000169684	15	78814681	CHRNA5	G	3.22262e-17	-8.43803	0	G	-	1
15:78815298:A:G	BIOSQTL	BIOS_eQTL_geneLevel	ENSG00000041357	15	78815298	PSMA4	A	1.89468e-19	-9.01904	0	A	-	1
15:78815298:A:G	BIOSQTL	BIOS_eQTL_geneLevel	ENSG00000080644	15	78815298	CHRNA3	A	1.62675e-06	-4.79496	0.00133388	A	-	1
15:78815298:A:G	BIOSQTL	BIOS_eQTL_geneLevel	ENSG00000080644	15	78815298	CHRNA3	A	2.90667e-07	-5.12924	0.000211612	A	-	1
15:78815298:A:G	BIOSQTL	BIOS_eQTL_geneLevel	ENSG00000169684	15	78815298	CHRNA5	A	1.62675e-06	-4.79496	0.00133388	A	-	1
15:78815298:A:G	BIOSQTL	BIOS_eQTL_geneLevel	ENSG00000169684	15	78815298	CHRNA5	A	3.53063e-12	-6.95463	0	A	-	1
15:78815298:A:G	BIOSQTL	BIOS_eQTL_geneLevel	ENSG00000169684	15	78815298	CHRNA5	A	2.95828e-17	-8.44804	0	A	-	1
15:78816057:G:T	BIOSQTL	BIOS_eQTL_geneLevel	ENSG00000041357	15	78816057	PSMA4	T	4.65337e-56	15.7747	0	T	+	1
15:78816057:G:T	BIOSQTL	BIOS_eQTL_geneLevel	ENSG00000080644	15	78816057	CHRNA3	T	5.23996e-16	-8.10572	0	T	-	1
15:78816057:G:T	BIOSQTL	BIOS_eQTL_geneLevel	ENSG00000080644	15	78816057	CHRNA3	T	1.68812e-22	-9.75881	0	T	-	1
15:78816057:G:T	BIOSQTL	BIOS_eQTL_geneLevel	ENSG00000169684	15	78816057	CHRNA5	T	1.15804e-38	-13.0041	0	T	-	1
15:78816057:G:T	BIOSQTL	BIOS_eQTL_geneLevel	ENSG00000169684	15	78816057	CHRNA5	T	4.29493e-20	-9.18021	0	T	-	1
15:78816057:G:T	BIOSQTL	BIOS_eQTL_geneLevel	ENSG00000169684	15	78816057	CHRNA5	T	1.68812e-22	-9.75881	0	T	-	1
15:78816057:G:T	BIOSQTL	BIOS_eQTL_geneLevel	ENSG00000188266	15	78816057	HYKK	T	4.5923e-06	-4.58251	0.00323838	T	-	1
15:78817447:A:T	BIOSQTL	BIOS_eQTL_geneLevel	ENSG00000041357	15	78817447	PSMA4	T	2.24079e-19	-9.00065	0	T	-	1
15:78817447:A:T	BIOSQTL	BIOS_eQTL_geneLevel	ENSG00000080644	15	78817447	CHRNA3	T	1.89041e-06	-4.76472	0.00147588	T	-	1
15:78817447:A:T	BIOSQTL	BIOS_eQTL_geneLevel	ENSG00000080644	15	78817447	CHRNA3	T	2.5282e-07	-5.15544	0.000179699	T	-	1
15:78817447:A:T	BIOSQTL	BIOS_eQTL_geneLevel	ENSG00000169684	15	78817447	CHRNA5	T	1.89041e-06	-4.76472	0.00147588	T	-	1
15:78817447:A:T	BIOSQTL	BIOS_eQTL_geneLevel	ENSG00000169684	15	78817447	CHRNA5	T	3.24692e-12	-6.96644	0	T	-	1
15:78817447:A:T	BIOSQTL	BIOS_eQTL_geneLevel	ENSG00000169684	15	78817447	CHRNA5	T	2.89313e-17	-8.45061	0	T	-	1
15:78817929:C:T	BIOSQTL	BIOS_eQTL_geneLevel	ENSG00000041357	15	78817929	PSMA4	C	3.76248e-59	16.2181	0	T	-	1
15:78817929:C:T	BIOSQTL	BIOS_eQTL_geneLevel	ENSG00000080644	15	78817929	CHRNA3	C	2.74379e-24	-10.1683	0	T	+	1
15:78817929:C:T	BIOSQTL	BIOS_eQTL_geneLevel	ENSG00000080644	15	78817929	CHRNA3	C	1.08951e-16	-8.29451	0	T	+	1
15:78817929:C:T	BIOSQTL	BIOS_eQTL_geneLevel	ENSG00000169684	15	78817929	CHRNA5	C	2.74379e-24	-10.1683	0	T	+	1
15:78817929:C:T	BIOSQTL	BIOS_eQTL_geneLevel	ENSG00000169684	15	78817929	CHRNA5	C	1.39169e-39	-13.165	0	T	+	1
15:78817929:C:T	BIOSQTL	BIOS_eQTL_geneLevel	ENSG00000169684	15	78817929	CHRNA5	C	2.00638e-20	-9.2619	0	T	+	1
15:78817929:C:T	BIOSQTL	BIOS_eQTL_geneLevel	ENSG00000188266	15	78817929	HYKK	C	1.02231e-05	-4.41228	0.0070269	T	+	1
15:78821016:A:G	BIOSQTL	BIOS_eQTL_geneLevel	ENSG00000041357	15	78821016	PSMA4	A	2.849e-19	-8.97422	0	A	-	1
15:78821016:A:G	BIOSQTL	BIOS_eQTL_geneLevel	ENSG00000080644	15	78821016	CHRNA3	A	2.32849e-06	-4.72257	0.00178252	A	-	1
15:78821016:A:G	BIOSQTL	BIOS_eQTL_geneLevel	ENSG00000080644	15	78821016	CHRNA3	A	1.63916e-07	-5.23603	9.35454e-05	A	-	1
15:78821016:A:G	BIOSQTL	BIOS_eQTL_geneLevel	ENSG00000169684	15	78821016	CHRNA5	A	2.32849e-06	-4.72257	0.00178252	A	-	1
15:78821016:A:G	BIOSQTL	BIOS_eQTL_geneLevel	ENSG00000169684	15	78821016	CHRNA5	A	3.02409e-12	-6.97652	0	A	-	1
15:78821016:A:G	BIOSQTL	BIOS_eQTL_geneLevel	ENSG00000169684	15	78821016	CHRNA5	A	2.68757e-17	-8.45921	0	A	-	1
15:78822660:A:T	BIOSQTL	BIOS_eQTL_geneLevel	ENSG00000041357	15	78822660	PSMA4	T	2.95977e-19	-8.9702	0	T	-	1
15:78822660:A:T	BIOSQTL	BIOS_eQTL_geneLevel	ENSG00000080644	15	78822660	CHRNA3	T	2.59652e-06	-4.7003	0.00196078	T	-	1
15:78822660:A:T	BIOSQTL	BIOS_eQTL_geneLevel	ENSG00000080644	15	78822660	CHRNA3	T	1.56962e-07	-5.24404	8.81591e-05	T	-	1
15:78822660:A:T	BIOSQTL	BIOS_eQTL_geneLevel	ENSG00000169684	15	78822660	CHRNA5	T	2.59652e-06	-4.7003	0.00196078	T	-	1
15:78822660:A:T	BIOSQTL	BIOS_eQTL_geneLevel	ENSG00000169684	15	78822660	CHRNA5	T	2.69838e-12	-6.99254	0	T	-	1
15:78822660:A:T	BIOSQTL	BIOS_eQTL_geneLevel	ENSG00000169684	15	78822660	CHRNA5	T	2.88324e-17	-8.4512	0	T	-	1
15:78824924:A:G	BIOSQTL	BIOS_eQTL_geneLevel	ENSG00000041357	15	78824924	PSMA4	A	3.3667e-19	-8.95584	0	A	-	1
15:78824924:A:G	BIOSQTL	BIOS_eQTL_geneLevel	ENSG00000080644	15	78824924	CHRNA3	A	2.47474e-06	-4.71002	0.0018967	A	-	1
15:78824924:A:G	BIOSQTL	BIOS_eQTL_geneLevel	ENSG00000080644	15	78824924	CHRNA3	A	1.53593e-07	-5.24804	8.82223e-05	A	-	1
15:78824924:A:G	BIOSQTL	BIOS_eQTL_geneLevel	ENSG00000169684	15	78824924	CHRNA5	A	2.47474e-06	-4.71002	0.0018967	A	-	1
15:78824924:A:G	BIOSQTL	BIOS_eQTL_geneLevel	ENSG00000169684	15	78824924	CHRNA5	A	2.77643e-12	-6.98842	0	A	-	1
15:78824924:A:G	BIOSQTL	BIOS_eQTL_geneLevel	ENSG00000169684	15	78824924	CHRNA5	A	2.98372e-17	-8.44719	0	A	-	1
15:78825917:A:G	BIOSQTL	BIOS_eQTL_geneLevel	ENSG00000041357	15	78825917	PSMA4	G	4.45553e-23	9.89322	0	G	+	1
15:78825917:A:G	BIOSQTL	BIOS_eQTL_geneLevel	ENSG00000080644	15	78825917	CHRNA3	G	5.58243e-05	-4.02965	0.0322957	G	-	1
15:78825917:A:G	BIOSQTL	BIOS_eQTL_geneLevel	ENSG00000169684	15	78825917	CHRNA5	G	5.58243e-05	-4.02965	0.0322957	G	-	1
15:78825917:A:G	BIOSQTL	BIOS_eQTL_geneLevel	ENSG00000169684	15	78825917	CHRNA5	G	4.12254e-09	-5.87914	5.98623e-06	G	-	1
15:78826180:A:G	BIOSQTL	BIOS_eQTL_geneLevel	ENSG00000041357	15	78826180	PSMA4	G	3.87369e-57	15.931	0	A	-	1
15:78826180:A:G	BIOSQTL	BIOS_eQTL_geneLevel	ENSG00000080644	15	78826180	CHRNA3	G	1.4969e-15	-7.97711	0	A	+	1
15:78826180:A:G	BIOSQTL	BIOS_eQTL_geneLevel	ENSG00000080644	15	78826180	CHRNA3	G	4.95308e-23	-9.88253	0	A	+	1
15:78826180:A:G	BIOSQTL	BIOS_eQTL_geneLevel	ENSG00000169684	15	78826180	CHRNA5	G	2.8414e-38	-12.9353	0	A	+	1
15:78826180:A:G	BIOSQTL	BIOS_eQTL_geneLevel	ENSG00000169684	15	78826180	CHRNA5	G	1.10792e-19	-9.07764	0	A	+	1
15:78826180:A:G	BIOSQTL	BIOS_eQTL_geneLevel	ENSG00000169684	15	78826180	CHRNA5	G	4.95308e-23	-9.88253	0	A	+	1
15:78826180:A:G	BIOSQTL	BIOS_eQTL_geneLevel	ENSG00000188266	15	78826180	HYKK	G	3.7496e-06	-4.62463	0.00274255	A	+	1
15:78826948:C:T	BIOSQTL	BIOS_eQTL_geneLevel	ENSG00000041357	15	78826948	PSMA4	C	2.28198e-19	-8.9987	0	C	-	1
15:78826948:C:T	BIOSQTL	BIOS_eQTL_geneLevel	ENSG00000080644	15	78826948	CHRNA3	C	3.2714e-06	-4.65284	0.00243236	C	-	1
15:78826948:C:T	BIOSQTL	BIOS_eQTL_geneLevel	ENSG00000080644	15	78826948	CHRNA3	C	1.42187e-07	-5.26225	8.84467e-05	C	-	1
15:78826948:C:T	BIOSQTL	BIOS_eQTL_geneLevel	ENSG00000169684	15	78826948	CHRNA5	C	3.2714e-06	-4.65284	0.00243236	C	-	1
15:78826948:C:T	BIOSQTL	BIOS_eQTL_geneLevel	ENSG00000169684	15	78826948	CHRNA5	C	1.65547e-12	-7.06073	0	C	-	1
15:78826948:C:T	BIOSQTL	BIOS_eQTL_geneLevel	ENSG00000169684	15	78826948	CHRNA5	C	2.62831e-17	-8.4618	0	C	-	1
15:78828086:G:T	BIOSQTL	BIOS_eQTL_geneLevel	ENSG00000041357	15	78828086	PSMA4	T	1.38803e-56	15.8509	0	T	+	1
15:78828086:G:T	BIOSQTL	BIOS_eQTL_geneLevel	ENSG00000080644	15	78828086	CHRNA3	T	1.33849e-15	-7.99086	0	T	-	1
15:78828086:G:T	BIOSQTL	BIOS_eQTL_geneLevel	ENSG00000080644	15	78828086	CHRNA3	T	5.6389e-23	-9.86949	0	T	-	1
15:78828086:G:T	BIOSQTL	BIOS_eQTL_geneLevel	ENSG00000136378	15	78828086	ADAMTS7	T	5.93758e-06	-4.52841	0.00416935	T	-	1
15:78828086:G:T	BIOSQTL	BIOS_eQTL_geneLevel	ENSG00000169684	15	78828086	CHRNA5	T	9.34338e-39	-13.0205	0	T	-	1
15:78828086:G:T	BIOSQTL	BIOS_eQTL_geneLevel	ENSG00000169684	15	78828086	CHRNA5	T	3.93572e-20	-9.18964	0	T	-	1
15:78828086:G:T	BIOSQTL	BIOS_eQTL_geneLevel	ENSG00000169684	15	78828086	CHRNA5	T	5.6389e-23	-9.86949	0	T	-	1
15:78828086:G:T	BIOSQTL	BIOS_eQTL_geneLevel	ENSG00000188266	15	78828086	HYKK	T	5.19883e-06	-4.55651	0.00365708	T	-	1
15:78829091:C:T	BIOSQTL	BIOS_eQTL_geneLevel	ENSG00000041357	15	78829091	PSMA4	C	3.84271e-19	-8.94123	0	C	-	1
15:78829091:C:T	BIOSQTL	BIOS_eQTL_geneLevel	ENSG00000080644	15	78829091	CHRNA3	C	2.47474e-06	-4.71002	0.0018967	C	-	1
15:78829091:C:T	BIOSQTL	BIOS_eQTL_geneLevel	ENSG00000080644	15	78829091	CHRNA3	C	1.53593e-07	-5.24804	8.82223e-05	C	-	1
15:78829091:C:T	BIOSQTL	BIOS_eQTL_geneLevel	ENSG00000169684	15	78829091	CHRNA5	C	2.47474e-06	-4.71002	0.0018967	C	-	1
15:78829091:C:T	BIOSQTL	BIOS_eQTL_geneLevel	ENSG00000169684	15	78829091	CHRNA5	C	2.77643e-12	-6.98842	0	C	-	1
15:78829091:C:T	BIOSQTL	BIOS_eQTL_geneLevel	ENSG00000169684	15	78829091	CHRNA5	C	2.98372e-17	-8.44719	0	C	-	1
15:78831624:G:T	BIOSQTL	BIOS_eQTL_geneLevel	ENSG00000041357	15	78831624	PSMA4	G	3.84271e-19	-8.94123	0	G	-	1
15:78831624:G:T	BIOSQTL	BIOS_eQTL_geneLevel	ENSG00000080644	15	78831624	CHRNA3	G	2.47474e-06	-4.71002	0.0018967	G	-	1
15:78831624:G:T	BIOSQTL	BIOS_eQTL_geneLevel	ENSG00000080644	15	78831624	CHRNA3	G	1.53593e-07	-5.24804	8.82223e-05	G	-	1
15:78831624:G:T	BIOSQTL	BIOS_eQTL_geneLevel	ENSG00000169684	15	78831624	CHRNA5	G	2.47474e-06	-4.71002	0.0018967	G	-	1
15:78831624:G:T	BIOSQTL	BIOS_eQTL_geneLevel	ENSG00000169684	15	78831624	CHRNA5	G	2.77643e-12	-6.98842	0	G	-	1
15:78831624:G:T	BIOSQTL	BIOS_eQTL_geneLevel	ENSG00000169684	15	78831624	CHRNA5	G	2.62831e-17	-8.4618	0	G	-	1
15:78831826:A:G	BIOSQTL	BIOS_eQTL_geneLevel	ENSG00000041357	15	78831826	PSMA4	A	3.84271e-19	-8.94123	0	A	-	1
15:78831826:A:G	BIOSQTL	BIOS_eQTL_geneLevel	ENSG00000080644	15	78831826	CHRNA3	A	2.47474e-06	-4.71002	0.0018967	A	-	1
15:78831826:A:G	BIOSQTL	BIOS_eQTL_geneLevel	ENSG00000080644	15	78831826	CHRNA3	A	1.53593e-07	-5.24804	8.82223e-05	A	-	1
15:78831826:A:G	BIOSQTL	BIOS_eQTL_geneLevel	ENSG00000169684	15	78831826	CHRNA5	A	2.47474e-06	-4.71002	0.0018967	A	-	1
15:78831826:A:G	BIOSQTL	BIOS_eQTL_geneLevel	ENSG00000169684	15	78831826	CHRNA5	A	2.77643e-12	-6.98842	0	A	-	1
15:78831826:A:G	BIOSQTL	BIOS_eQTL_geneLevel	ENSG00000169684	15	78831826	CHRNA5	A	2.62831e-17	-8.4618	0	A	-	1
15:78832349:C:T	BIOSQTL	BIOS_eQTL_geneLevel	ENSG00000041357	15	78832349	PSMA4	C	8.54708e-39	13.0275	0	C	+	1
15:78832349:C:T	BIOSQTL	BIOS_eQTL_geneLevel	ENSG00000080644	15	78832349	CHRNA3	C	2.28683e-09	-5.9759	6.06575e-06	C	-	1
15:78832349:C:T	BIOSQTL	BIOS_eQTL_geneLevel	ENSG00000080644	15	78832349	CHRNA3	C	3.06528e-11	-6.6434	0	C	-	1
15:78832349:C:T	BIOSQTL	BIOS_eQTL_geneLevel	ENSG00000169684	15	78832349	CHRNA5	C	1.4755e-23	-10.0032	0	C	-	1
15:78832349:C:T	BIOSQTL	BIOS_eQTL_geneLevel	ENSG00000169684	15	78832349	CHRNA5	C	5.28067e-11	-6.56273	0	C	-	1
15:78832349:C:T	BIOSQTL	BIOS_eQTL_geneLevel	ENSG00000169684	15	78832349	CHRNA5	C	3.06528e-11	-6.6434	0	C	-	1
15:78832832:C:T	BIOSQTL	BIOS_eQTL_geneLevel	ENSG00000041357	15	78832832	PSMA4	C	1.90161e-19	-9.01873	0	C	-	1
15:78832832:C:T	BIOSQTL	BIOS_eQTL_geneLevel	ENSG00000080644	15	78832832	CHRNA3	C	2.80507e-06	-4.68446	0.00211879	C	-	1
15:78832832:C:T	BIOSQTL	BIOS_eQTL_geneLevel	ENSG00000080644	15	78832832	CHRNA3	C	1.6445e-07	-5.23556	9.9048e-05	C	-	1
15:78832832:C:T	BIOSQTL	BIOS_eQTL_geneLevel	ENSG00000169684	15	78832832	CHRNA5	C	2.80507e-06	-4.68446	0.00211879	C	-	1
15:78832832:C:T	BIOSQTL	BIOS_eQTL_geneLevel	ENSG00000169684	15	78832832	CHRNA5	C	1.01612e-11	-6.80407	0	C	-	1
15:78832832:C:T	BIOSQTL	BIOS_eQTL_geneLevel	ENSG00000169684	15	78832832	CHRNA5	C	2.88324e-17	-8.4512	0	C	-	1
15:78833036:A:C	BIOSQTL	BIOS_eQTL_geneLevel	ENSG00000041357	15	78833036	PSMA4	A	3.0692e-19	-8.96613	0	A	-	1
15:78833036:A:C	BIOSQTL	BIOS_eQTL_geneLevel	ENSG00000080644	15	78833036	CHRNA3	A	2.22318e-06	-4.73188	0.00172467	A	-	1
15:78833036:A:C	BIOSQTL	BIOS_eQTL_geneLevel	ENSG00000080644	15	78833036	CHRNA3	A	1.50947e-07	-5.25138	8.8271e-05	A	-	1
15:78833036:A:C	BIOSQTL	BIOS_eQTL_geneLevel	ENSG00000169684	15	78833036	CHRNA5	A	2.22318e-06	-4.73188	0.00172467	A	-	1
15:78833036:A:C	BIOSQTL	BIOS_eQTL_geneLevel	ENSG00000169684	15	78833036	CHRNA5	A	3.52562e-12	-6.9549	0	A	-	1
15:78833036:A:C	BIOSQTL	BIOS_eQTL_geneLevel	ENSG00000169684	15	78833036	CHRNA5	A	2.71071e-17	-8.45839	0	A	-	1
15:78833450:A:C	BIOSQTL	BIOS_eQTL_geneLevel	ENSG00000041357	15	78833450	PSMA4	A	3.17687e-19	-8.96221	0	A	-	1
15:78833450:A:C	BIOSQTL	BIOS_eQTL_geneLevel	ENSG00000080644	15	78833450	CHRNA3	A	2.26296e-06	-4.72829	0.00176416	A	-	1
15:78833450:A:C	BIOSQTL	BIOS_eQTL_geneLevel	ENSG00000080644	15	78833450	CHRNA3	A	1.3189e-07	-5.27614	8.31025e-05	A	-	1
15:78833450:A:C	BIOSQTL	BIOS_eQTL_geneLevel	ENSG00000169684	15	78833450	CHRNA5	A	2.26296e-06	-4.72829	0.00176416	A	-	1
15:78833450:A:C	BIOSQTL	BIOS_eQTL_geneLevel	ENSG00000169684	15	78833450	CHRNA5	A	3.29806e-12	-6.96434	0	A	-	1
15:78833450:A:C	BIOSQTL	BIOS_eQTL_geneLevel	ENSG00000169684	15	78833450	CHRNA5	A	1.74836e-17	-8.50921	0	A	-	1
15:78833453:C:T	BIOSQTL	BIOS_eQTL_geneLevel	ENSG00000041357	15	78833453	PSMA4	C	3.17687e-19	-8.96221	0	C	-	1
15:78833453:C:T	BIOSQTL	BIOS_eQTL_geneLevel	ENSG00000080644	15	78833453	CHRNA3	C	2.26296e-06	-4.72829	0.00176416	C	-	1
15:78833453:C:T	BIOSQTL	BIOS_eQTL_geneLevel	ENSG00000080644	15	78833453	CHRNA3	C	1.3189e-07	-5.27614	8.31025e-05	C	-	1
15:78833453:C:T	BIOSQTL	BIOS_eQTL_geneLevel	ENSG00000169684	15	78833453	CHRNA5	C	2.26296e-06	-4.72829	0.00176416	C	-	1
15:78833453:C:T	BIOSQTL	BIOS_eQTL_geneLevel	ENSG00000169684	15	78833453	CHRNA5	C	3.29806e-12	-6.96434	0	C	-	1
15:78833453:C:T	BIOSQTL	BIOS_eQTL_geneLevel	ENSG00000169684	15	78833453	CHRNA5	C	1.74836e-17	-8.50921	0	C	-	1
15:78837673:C:T	BIOSQTL	BIOS_eQTL_geneLevel	ENSG00000041357	15	78837673	PSMA4	T	1.14052e-18	-8.82022	0	T	-	1
15:78837673:C:T	BIOSQTL	BIOS_eQTL_geneLevel	ENSG00000080644	15	78837673	CHRNA3	T	9.23858e-07	-4.90708	0.00081399	T	-	1
15:78837673:C:T	BIOSQTL	BIOS_eQTL_geneLevel	ENSG00000080644	15	78837673	CHRNA3	T	2.05602e-07	-5.19416	0.000136791	T	-	1
15:78837673:C:T	BIOSQTL	BIOS_eQTL_geneLevel	ENSG00000169684	15	78837673	CHRNA5	T	9.23858e-07	-4.90708	0.00081399	T	-	1
15:78837673:C:T	BIOSQTL	BIOS_eQTL_geneLevel	ENSG00000169684	15	78837673	CHRNA5	T	1.71611e-12	-7.05579	0	T	-	1
15:78837673:C:T	BIOSQTL	BIOS_eQTL_geneLevel	ENSG00000169684	15	78837673	CHRNA5	T	2.95322e-17	-8.44822	0	T	-	1
15:78840567:C:T	BIOSQTL	BIOS_eQTL_geneLevel	ENSG00000041357	15	78840567	PSMA4	T	8.97369e-18	-8.58626	0	T	-	1
15:78840567:C:T	BIOSQTL	BIOS_eQTL_geneLevel	ENSG00000080644	15	78840567	CHRNA3	T	1.85511e-06	-4.76842	0.00145651	T	-	1
15:78840567:C:T	BIOSQTL	BIOS_eQTL_geneLevel	ENSG00000080644	15	78840567	CHRNA3	T	1.16694e-07	-5.29848	8.33704e-05	T	-	1
15:78840567:C:T	BIOSQTL	BIOS_eQTL_geneLevel	ENSG00000169684	15	78840567	CHRNA5	T	1.85511e-06	-4.76842	0.00145651	T	-	1
15:78840567:C:T	BIOSQTL	BIOS_eQTL_geneLevel	ENSG00000169684	15	78840567	CHRNA5	T	3.56586e-12	-6.95329	0	T	-	1
15:78840567:C:T	BIOSQTL	BIOS_eQTL_geneLevel	ENSG00000169684	15	78840567	CHRNA5	T	8.70772e-17	-8.32116	0	T	-	1
15:78845110:A:G	BIOSQTL	BIOS_eQTL_geneLevel	ENSG00000041357	15	78845110	PSMA4	G	4.20651e-19	-8.93132	0	G	-	1
15:78845110:A:G	BIOSQTL	BIOS_eQTL_geneLevel	ENSG00000080644	15	78845110	CHRNA3	G	2.46262e-06	-4.71104	0.0018867	G	-	1
15:78845110:A:G	BIOSQTL	BIOS_eQTL_geneLevel	ENSG00000080644	15	78845110	CHRNA3	G	1.24747e-07	-5.28628	8.3227e-05	G	-	1
15:78845110:A:G	BIOSQTL	BIOS_eQTL_geneLevel	ENSG00000169684	15	78845110	CHRNA5	G	2.46262e-06	-4.71104	0.0018867	G	-	1
15:78845110:A:G	BIOSQTL	BIOS_eQTL_geneLevel	ENSG00000169684	15	78845110	CHRNA5	G	5.49361e-12	-6.89213	0	G	-	1
15:78845110:A:G	BIOSQTL	BIOS_eQTL_geneLevel	ENSG00000169684	15	78845110	CHRNA5	G	2.32269e-17	-8.47627	0	G	-	1
15:78849034:C:T	BIOSQTL	BIOS_eQTL_geneLevel	ENSG00000041357	15	78849034	PSMA4	C	1.25477e-54	15.5653	0	C	+	1
15:78849034:C:T	BIOSQTL	BIOS_eQTL_geneLevel	ENSG00000080644	15	78849034	CHRNA3	C	1.12308e-15	-8.01251	0	C	-	1
15:78849034:C:T	BIOSQTL	BIOS_eQTL_geneLevel	ENSG00000080644	15	78849034	CHRNA3	C	7.31148e-22	-9.60919	0	C	-	1
15:78849034:C:T	BIOSQTL	BIOS_eQTL_geneLevel	ENSG00000136378	15	78849034	ADAMTS7	C	9.06301e-06	-4.43833	0.00621408	C	-	1
15:78849034:C:T	BIOSQTL	BIOS_eQTL_geneLevel	ENSG00000169684	15	78849034	CHRNA5	C	9.53782e-38	-12.8418	0	C	-	1
15:78849034:C:T	BIOSQTL	BIOS_eQTL_geneLevel	ENSG00000169684	15	78849034	CHRNA5	C	1.92255e-19	-9.01748	0	C	-	1
15:78849034:C:T	BIOSQTL	BIOS_eQTL_geneLevel	ENSG00000169684	15	78849034	CHRNA5	C	7.31148e-22	-9.60919	0	C	-	1
15:78849034:C:T	BIOSQTL	BIOS_eQTL_geneLevel	ENSG00000188266	15	78849034	HYKK	C	5.82069e-06	-4.53273	0.00411753	C	-	1
15:78849779:C:T	BIOSQTL	BIOS_eQTL_geneLevel	ENSG00000041357	15	78849779	PSMA4	T	2.54302e-55	15.6672	0	T	+	1
15:78849779:C:T	BIOSQTL	BIOS_eQTL_geneLevel	ENSG00000080644	15	78849779	CHRNA3	T	5.6054e-16	-8.09752	0	T	-	1
15:78849779:C:T	BIOSQTL	BIOS_eQTL_geneLevel	ENSG00000080644	15	78849779	CHRNA3	T	2.71733e-22	-9.71048	0	T	-	1
15:78849779:C:T	BIOSQTL	BIOS_eQTL_geneLevel	ENSG00000136378	15	78849779	ADAMTS7	T	6.18396e-06	-4.51986	0.0043274	T	-	1
15:78849779:C:T	BIOSQTL	BIOS_eQTL_geneLevel	ENSG00000169684	15	78849779	CHRNA5	T	9.83815e-38	-12.8395	0	T	-	1
15:78849779:C:T	BIOSQTL	BIOS_eQTL_geneLevel	ENSG00000169684	15	78849779	CHRNA5	T	4.83667e-20	-9.16742	0	T	-	1
15:78849779:C:T	BIOSQTL	BIOS_eQTL_geneLevel	ENSG00000169684	15	78849779	CHRNA5	T	2.71733e-22	-9.71048	0	T	-	1
15:78849779:C:T	BIOSQTL	BIOS_eQTL_geneLevel	ENSG00000188266	15	78849779	HYKK	T	2.45779e-06	-4.71143	0.0018816	T	-	1
15:78849918:C:T	BIOSQTL	BIOS_eQTL_geneLevel	ENSG00000041357	15	78849918	PSMA4	T	9.90868e-18	-8.57482	0	T	-	1
15:78849918:C:T	BIOSQTL	BIOS_eQTL_geneLevel	ENSG00000080644	15	78849918	CHRNA3	T	1.37496e-06	-4.82842	0.00116418	T	-	1
15:78849918:C:T	BIOSQTL	BIOS_eQTL_geneLevel	ENSG00000080644	15	78849918	CHRNA3	T	6.82775e-07	-4.96619	0.000571792	T	-	1
15:78849918:C:T	BIOSQTL	BIOS_eQTL_geneLevel	ENSG00000169684	15	78849918	CHRNA5	T	1.37496e-06	-4.82842	0.00116418	T	-	1
15:78849918:C:T	BIOSQTL	BIOS_eQTL_geneLevel	ENSG00000169684	15	78849918	CHRNA5	T	5.46969e-10	-6.20485	0	T	-	1
15:78849918:C:T	BIOSQTL	BIOS_eQTL_geneLevel	ENSG00000169684	15	78849918	CHRNA5	T	1.80293e-15	-7.95413	0	T	-	1
15:78850558:A:G	BIOSQTL	BIOS_eQTL_geneLevel	ENSG00000041357	15	78850558	PSMA4	A	1.03305e-17	-8.57008	0	A	-	1
15:78850558:A:G	BIOSQTL	BIOS_eQTL_geneLevel	ENSG00000080644	15	78850558	CHRNA3	A	2.01614e-06	-4.75164	0.00157044	A	-	1
15:78850558:A:G	BIOSQTL	BIOS_eQTL_geneLevel	ENSG00000080644	15	78850558	CHRNA3	A	1.30317e-07	-5.27826	8.31163e-05	A	-	1
15:78850558:A:G	BIOSQTL	BIOS_eQTL_geneLevel	ENSG00000169684	15	78850558	CHRNA5	A	2.01614e-06	-4.75164	0.00157044	A	-	1
15:78850558:A:G	BIOSQTL	BIOS_eQTL_geneLevel	ENSG00000169684	15	78850558	CHRNA5	A	4.54201e-12	-6.91905	0	A	-	1
15:78850558:A:G	BIOSQTL	BIOS_eQTL_geneLevel	ENSG00000169684	15	78850558	CHRNA5	A	1.31509e-16	-8.27212	0	A	-	1
15:78851615:A:G	BIOSQTL	BIOS_eQTL_geneLevel	ENSG00000041357	15	78851615	PSMA4	A	2.30668e-55	15.6732	0	A	+	1
15:78851615:A:G	BIOSQTL	BIOS_eQTL_geneLevel	ENSG00000080644	15	78851615	CHRNA3	A	4.02525e-16	-8.13771	0	A	-	1
15:78851615:A:G	BIOSQTL	BIOS_eQTL_geneLevel	ENSG00000080644	15	78851615	CHRNA3	A	5.25246e-22	-9.64316	0	A	-	1
15:78851615:A:G	BIOSQTL	BIOS_eQTL_geneLevel	ENSG00000136378	15	78851615	ADAMTS7	A	6.73804e-06	-4.50162	0.00472037	A	-	1
15:78851615:A:G	BIOSQTL	BIOS_eQTL_geneLevel	ENSG00000169684	15	78851615	CHRNA5	A	1.26374e-37	-12.8201	0	A	-	1
15:78851615:A:G	BIOSQTL	BIOS_eQTL_geneLevel	ENSG00000169684	15	78851615	CHRNA5	A	8.67446e-20	-9.10421	0	A	-	1
15:78851615:A:G	BIOSQTL	BIOS_eQTL_geneLevel	ENSG00000169684	15	78851615	CHRNA5	A	5.25246e-22	-9.64316	0	A	-	1
15:78851615:A:G	BIOSQTL	BIOS_eQTL_geneLevel	ENSG00000188266	15	78851615	HYKK	A	3.50777e-06	-4.63849	0.00255246	A	-	1
15:78857896:A:T	BIOSQTL	BIOS_eQTL_geneLevel	ENSG00000041357	15	78857896	PSMA4	A	1.09852e-18	-8.8245	0	A	-	1
15:78857896:A:T	BIOSQTL	BIOS_eQTL_geneLevel	ENSG00000080644	15	78857896	CHRNA3	A	2.59398e-06	-4.7006	0.00195579	A	-	1
15:78857896:A:T	BIOSQTL	BIOS_eQTL_geneLevel	ENSG00000080644	15	78857896	CHRNA3	A	4.53047e-07	-5.04502	0.00032678	A	-	1
15:78857896:A:T	BIOSQTL	BIOS_eQTL_geneLevel	ENSG00000169684	15	78857896	CHRNA5	A	2.59398e-06	-4.7006	0.00195579	A	-	1
15:78857896:A:T	BIOSQTL	BIOS_eQTL_geneLevel	ENSG00000169684	15	78857896	CHRNA5	A	4.7939e-11	-6.57713	0	A	-	1
15:78857896:A:T	BIOSQTL	BIOS_eQTL_geneLevel	ENSG00000169684	15	78857896	CHRNA5	A	8.57644e-17	-8.32292	0	A	-	1
15:78857939:G:T	BIOSQTL	BIOS_eQTL_geneLevel	ENSG00000041357	15	78857939	PSMA4	G	7.6222e-53	15.3003	0	G	+	1
15:78857939:G:T	BIOSQTL	BIOS_eQTL_geneLevel	ENSG00000080644	15	78857939	CHRNA3	G	1.44917e-15	-7.98113	0	G	-	1
15:78857939:G:T	BIOSQTL	BIOS_eQTL_geneLevel	ENSG00000080644	15	78857939	CHRNA3	G	2.90765e-21	-9.46596	0	G	-	1
15:78857939:G:T	BIOSQTL	BIOS_eQTL_geneLevel	ENSG00000136378	15	78857939	ADAMTS7	G	7.67697e-06	-4.47386	0.00531013	G	-	1
15:78857939:G:T	BIOSQTL	BIOS_eQTL_geneLevel	ENSG00000169684	15	78857939	CHRNA5	G	5.91297e-37	-12.6998	0	G	-	1
15:78857939:G:T	BIOSQTL	BIOS_eQTL_geneLevel	ENSG00000169684	15	78857939	CHRNA5	G	5.209e-20	-9.1594	0	G	-	1
15:78857939:G:T	BIOSQTL	BIOS_eQTL_geneLevel	ENSG00000169684	15	78857939	CHRNA5	G	2.90765e-21	-9.46596	0	G	-	1
15:78857939:G:T	BIOSQTL	BIOS_eQTL_geneLevel	ENSG00000188266	15	78857939	HYKK	G	2.04223e-06	-4.74912	0.00158527	G	-	1
15:78857986:C:G	BIOSQTL	BIOS_eQTL_geneLevel	ENSG00000041357	15	78857986	PSMA4	G	8.12277e-55	15.593	0	G	+	1
15:78857986:C:G	BIOSQTL	BIOS_eQTL_geneLevel	ENSG00000080644	15	78857986	CHRNA3	G	2.68709e-16	-8.18658	0	G	-	1
15:78857986:C:G	BIOSQTL	BIOS_eQTL_geneLevel	ENSG00000080644	15	78857986	CHRNA3	G	6.80431e-22	-9.61653	0	G	-	1
15:78857986:C:G	BIOSQTL	BIOS_eQTL_geneLevel	ENSG00000136378	15	78857986	ADAMTS7	G	7.57702e-06	-4.47662	0.00522494	G	-	1
15:78857986:C:G	BIOSQTL	BIOS_eQTL_geneLevel	ENSG00000169684	15	78857986	CHRNA5	G	1.66504e-37	-12.7988	0	G	-	1
15:78857986:C:G	BIOSQTL	BIOS_eQTL_geneLevel	ENSG00000169684	15	78857986	CHRNA5	G	7.95459e-20	-9.11374	0	G	-	1
15:78857986:C:G	BIOSQTL	BIOS_eQTL_geneLevel	ENSG00000169684	15	78857986	CHRNA5	G	6.80431e-22	-9.61653	0	G	-	1
15:78857986:C:G	BIOSQTL	BIOS_eQTL_geneLevel	ENSG00000188266	15	78857986	HYKK	G	4.09306e-06	-4.60652	0.00292967	G	-	1
15:78858400:C:G	BIOSQTL	BIOS_eQTL_geneLevel	ENSG00000041357	15	78858400	PSMA4	G	3.40971e-17	-8.43155	0	G	-	1
15:78858400:C:G	BIOSQTL	BIOS_eQTL_geneLevel	ENSG00000080644	15	78858400	CHRNA3	G	2.89687e-06	-4.67795	0.0021833	G	-	1
15:78858400:C:G	BIOSQTL	BIOS_eQTL_geneLevel	ENSG00000080644	15	78858400	CHRNA3	G	1.13044e-07	-5.30423	8.34214e-05	G	-	1
15:78858400:C:G	BIOSQTL	BIOS_eQTL_geneLevel	ENSG00000169684	15	78858400	CHRNA5	G	2.89687e-06	-4.67795	0.0021833	G	-	1
15:78858400:C:G	BIOSQTL	BIOS_eQTL_geneLevel	ENSG00000169684	15	78858400	CHRNA5	G	4.40308e-12	-6.92345	0	G	-	1
15:78858400:C:G	BIOSQTL	BIOS_eQTL_geneLevel	ENSG00000169684	15	78858400	CHRNA5	G	4.0319e-16	-8.13751	0	G	-	1
15:78861918:A:G	BIOSQTL	BIOS_eQTL_geneLevel	ENSG00000041357	15	78861918	PSMA4	A	5.60166e-18	-8.64038	0	A	-	1
15:78861918:A:G	BIOSQTL	BIOS_eQTL_geneLevel	ENSG00000080644	15	78861918	CHRNA3	A	6.7438e-07	-4.96854	0.000566797	A	-	1
15:78861918:A:G	BIOSQTL	BIOS_eQTL_geneLevel	ENSG00000169684	15	78861918	CHRNA5	A	2.97812e-09	-5.93268	6.03318e-06	A	-	1
15:78861918:A:G	BIOSQTL	BIOS_eQTL_geneLevel	ENSG00000169684	15	78861918	CHRNA5	A	1.32941e-13	-7.40316	0	A	-	1
15:78862064:C:T	BIOSQTL	BIOS_eQTL_geneLevel	ENSG00000041357	15	78862064	PSMA4	T	3.13021e-54	15.5067	0	T	+	1
15:78862064:C:T	BIOSQTL	BIOS_eQTL_geneLevel	ENSG00000080644	15	78862064	CHRNA3	T	7.20624e-17	-8.34356	0	T	-	1
15:78862064:C:T	BIOSQTL	BIOS_eQTL_geneLevel	ENSG00000080644	15	78862064	CHRNA3	T	1.24302e-21	-9.55437	0	T	-	1
15:78862064:C:T	BIOSQTL	BIOS_eQTL_geneLevel	ENSG00000136378	15	78862064	ADAMTS7	T	9.02939e-06	-4.43911	0.0061818	T	-	1
15:78862064:C:T	BIOSQTL	BIOS_eQTL_geneLevel	ENSG00000169684	15	78862064	CHRNA5	T	6.3865e-36	-12.5124	0	T	-	1
15:78862064:C:T	BIOSQTL	BIOS_eQTL_geneLevel	ENSG00000169684	15	78862064	CHRNA5	T	4.43268e-20	-9.17697	0	T	-	1
15:78862064:C:T	BIOSQTL	BIOS_eQTL_geneLevel	ENSG00000169684	15	78862064	CHRNA5	T	1.24302e-21	-9.55437	0	T	-	1
15:78862064:C:T	BIOSQTL	BIOS_eQTL_geneLevel	ENSG00000188266	15	78862064	HYKK	T	3.94612e-06	-4.61409	0.00285298	T	-	1
15:78862453:A:C	BIOSQTL	BIOS_eQTL_geneLevel	ENSG00000041357	15	78862453	PSMA4	A	4.27298e-54	15.4867	0	A	+	1
15:78862453:A:C	BIOSQTL	BIOS_eQTL_geneLevel	ENSG00000080644	15	78862453	CHRNA3	A	7.20624e-17	-8.34356	0	A	-	1
15:78862453:A:C	BIOSQTL	BIOS_eQTL_geneLevel	ENSG00000080644	15	78862453	CHRNA3	A	1.29446e-21	-9.55003	0	A	-	1
15:78862453:A:C	BIOSQTL	BIOS_eQTL_geneLevel	ENSG00000136378	15	78862453	ADAMTS7	A	9.19868e-06	-4.43514	0.00633275	A	-	1
15:78862453:A:C	BIOSQTL	BIOS_eQTL_geneLevel	ENSG00000169684	15	78862453	CHRNA5	A	7.71329e-36	-12.4973	0	A	-	1
15:78862453:A:C	BIOSQTL	BIOS_eQTL_geneLevel	ENSG00000169684	15	78862453	CHRNA5	A	4.27106e-20	-9.18098	0	A	-	1
15:78862453:A:C	BIOSQTL	BIOS_eQTL_geneLevel	ENSG00000169684	15	78862453	CHRNA5	A	1.29446e-21	-9.55003	0	A	-	1
15:78862453:A:C	BIOSQTL	BIOS_eQTL_geneLevel	ENSG00000188266	15	78862453	HYKK	A	4.02282e-06	-4.61012	0.00288153	A	-	1
15:78862762:A:G	BIOSQTL	BIOS_eQTL_geneLevel	ENSG00000041357	15	78862762	PSMA4	A	3.47206e-19	-8.95255	0	NA	NA	1
15:78862762:A:G	BIOSQTL	BIOS_eQTL_geneLevel	ENSG00000080644	15	78862762	CHRNA3	A	3.9407e-07	-5.07171	0.000274253	NA	NA	1
15:78862762:A:G	BIOSQTL	BIOS_eQTL_geneLevel	ENSG00000169684	15	78862762	CHRNA5	A	1.02584e-08	-5.7263	1.76274e-05	NA	NA	1
15:78862762:A:G	BIOSQTL	BIOS_eQTL_geneLevel	ENSG00000169684	15	78862762	CHRNA5	A	9.16573e-14	-7.45222	0	NA	NA	1
15:78863472:C:T	BIOSQTL	BIOS_eQTL_geneLevel	ENSG00000041357	15	78863472	PSMA4	C	3.00307e-19	-8.96856	0	C	-	1
15:78863472:C:T	BIOSQTL	BIOS_eQTL_geneLevel	ENSG00000080644	15	78863472	CHRNA3	C	3.9407e-07	-5.07171	0.000274253	C	-	1
15:78863472:C:T	BIOSQTL	BIOS_eQTL_geneLevel	ENSG00000169684	15	78863472	CHRNA5	C	1.12976e-08	-5.70987	2.3459e-05	C	-	1
15:78863472:C:T	BIOSQTL	BIOS_eQTL_geneLevel	ENSG00000169684	15	78863472	CHRNA5	C	9.7386e-14	-7.44423	0	C	-	1
15:78865197:A:G	BIOSQTL	BIOS_eQTL_geneLevel	ENSG00000041357	15	78865197	PSMA4	G	5.79452e-54	15.4671	0	G	+	1
15:78865197:A:G	BIOSQTL	BIOS_eQTL_geneLevel	ENSG00000080644	15	78865197	CHRNA3	G	5.65524e-17	-8.37219	0	G	-	1
15:78865197:A:G	BIOSQTL	BIOS_eQTL_geneLevel	ENSG00000080644	15	78865197	CHRNA3	G	1.43108e-21	-9.53971	0	G	-	1
15:78865197:A:G	BIOSQTL	BIOS_eQTL_geneLevel	ENSG00000136378	15	78865197	ADAMTS7	G	9.54642e-06	-4.42719	0.00655913	G	-	1
15:78865197:A:G	BIOSQTL	BIOS_eQTL_geneLevel	ENSG00000169684	15	78865197	CHRNA5	G	7.71329e-36	-12.4973	0	G	-	1
15:78865197:A:G	BIOSQTL	BIOS_eQTL_geneLevel	ENSG00000169684	15	78865197	CHRNA5	G	4.11527e-20	-9.18499	0	G	-	1
15:78865197:A:G	BIOSQTL	BIOS_eQTL_geneLevel	ENSG00000169684	15	78865197	CHRNA5	G	1.43108e-21	-9.53971	0	G	-	1
15:78865197:A:G	BIOSQTL	BIOS_eQTL_geneLevel	ENSG00000188266	15	78865197	HYKK	G	4.18051e-06	-4.60217	0.00299689	G	-	1
15:78866445:A:G	BIOSQTL	BIOS_eQTL_geneLevel	ENSG00000041357	15	78866445	PSMA4	A	7.38224e-54	15.4516	0	A	+	1
15:78866445:A:G	BIOSQTL	BIOS_eQTL_geneLevel	ENSG00000080644	15	78866445	CHRNA3	A	5.65524e-17	-8.37219	0	A	-	1
15:78866445:A:G	BIOSQTL	BIOS_eQTL_geneLevel	ENSG00000080644	15	78866445	CHRNA3	A	1.43108e-21	-9.53971	0	A	-	1
15:78866445:A:G	BIOSQTL	BIOS_eQTL_geneLevel	ENSG00000136378	15	78866445	ADAMTS7	A	9.09675e-06	-4.4375	0.00626217	A	-	1
15:78866445:A:G	BIOSQTL	BIOS_eQTL_geneLevel	ENSG00000169684	15	78866445	CHRNA5	A	9.31363e-36	-12.4823	0	A	-	1
15:78866445:A:G	BIOSQTL	BIOS_eQTL_geneLevel	ENSG00000169684	15	78866445	CHRNA5	A	4.11527e-20	-9.18499	0	A	-	1
15:78866445:A:G	BIOSQTL	BIOS_eQTL_geneLevel	ENSG00000169684	15	78866445	CHRNA5	A	1.43108e-21	-9.53971	0	A	-	1
15:78866445:A:G	BIOSQTL	BIOS_eQTL_geneLevel	ENSG00000188266	15	78866445	HYKK	A	4.18051e-06	-4.60217	0.00299689	A	-	1
15:78867482:A:C	BIOSQTL	BIOS_eQTL_geneLevel	ENSG00000041357	15	78867482	PSMA4	C	5.83063e-54	15.4667	0	C	+	1
15:78867482:A:C	BIOSQTL	BIOS_eQTL_geneLevel	ENSG00000080644	15	78867482	CHRNA3	C	3.87568e-17	-8.41644	0	C	-	1
15:78867482:A:C	BIOSQTL	BIOS_eQTL_geneLevel	ENSG00000080644	15	78867482	CHRNA3	C	2.18108e-21	-9.49583	0	C	-	1
15:78867482:A:C	BIOSQTL	BIOS_eQTL_geneLevel	ENSG00000136378	15	78867482	ADAMTS7	C	9.71596e-06	-4.42326	0.00667767	C	-	1
15:78867482:A:C	BIOSQTL	BIOS_eQTL_geneLevel	ENSG00000169684	15	78867482	CHRNA5	C	1.35362e-35	-12.4525	0	C	-	1
15:78867482:A:C	BIOSQTL	BIOS_eQTL_geneLevel	ENSG00000169684	15	78867482	CHRNA5	C	8.14757e-20	-9.11104	0	C	-	1
15:78867482:A:C	BIOSQTL	BIOS_eQTL_geneLevel	ENSG00000169684	15	78867482	CHRNA5	C	2.18108e-21	-9.49583	0	C	-	1
15:78867482:A:C	BIOSQTL	BIOS_eQTL_geneLevel	ENSG00000188266	15	78867482	HYKK	C	7.21653e-06	-4.48713	0.00497715	C	-	1
15:78868398:C:T	BIOSQTL	BIOS_eQTL_geneLevel	ENSG00000041357	15	78868398	PSMA4	T	6.0999e-19	-8.89015	0	T	-	1
15:78868398:C:T	BIOSQTL	BIOS_eQTL_geneLevel	ENSG00000080644	15	78868398	CHRNA3	T	3.9407e-07	-5.07171	0.000274253	T	-	1
15:78868398:C:T	BIOSQTL	BIOS_eQTL_geneLevel	ENSG00000169684	15	78868398	CHRNA5	T	9.08407e-09	-5.74687	1.76741e-05	T	-	1
15:78868398:C:T	BIOSQTL	BIOS_eQTL_geneLevel	ENSG00000169684	15	78868398	CHRNA5	T	9.34818e-14	-7.44979	0	T	-	1
15:78868636:A:G	BIOSQTL	BIOS_eQTL_geneLevel	ENSG00000041357	15	78868636	PSMA4	A	9.31568e-54	15.4365	0	A	+	1
15:78868636:A:G	BIOSQTL	BIOS_eQTL_geneLevel	ENSG00000080644	15	78868636	CHRNA3	A	4.99554e-17	-8.38672	0	A	-	1
15:78868636:A:G	BIOSQTL	BIOS_eQTL_geneLevel	ENSG00000080644	15	78868636	CHRNA3	A	1.64724e-21	-9.52505	0	A	-	1
15:78868636:A:G	BIOSQTL	BIOS_eQTL_geneLevel	ENSG00000136378	15	78868636	ADAMTS7	A	9.09675e-06	-4.4375	0.00626217	A	-	1
15:78868636:A:G	BIOSQTL	BIOS_eQTL_geneLevel	ENSG00000169684	15	78868636	CHRNA5	A	1.12435e-35	-12.4673	0	A	-	1
15:78868636:A:G	BIOSQTL	BIOS_eQTL_geneLevel	ENSG00000169684	15	78868636	CHRNA5	A	5.39565e-20	-9.15571	0	A	-	1
15:78868636:A:G	BIOSQTL	BIOS_eQTL_geneLevel	ENSG00000169684	15	78868636	CHRNA5	A	1.64724e-21	-9.52505	0	A	-	1
15:78868636:A:G	BIOSQTL	BIOS_eQTL_geneLevel	ENSG00000188266	15	78868636	HYKK	A	4.47513e-06	-4.58792	0.00318564	A	-	1
15:78870803:C:T	BIOSQTL	BIOS_eQTL_geneLevel	ENSG00000041357	15	78870803	PSMA4	T	6.0999e-19	-8.89015	0	T	-	1
15:78870803:C:T	BIOSQTL	BIOS_eQTL_geneLevel	ENSG00000080644	15	78870803	CHRNA3	T	3.9407e-07	-5.07171	0.000274253	T	-	1
15:78870803:C:T	BIOSQTL	BIOS_eQTL_geneLevel	ENSG00000169684	15	78870803	CHRNA5	T	9.08407e-09	-5.74687	1.76741e-05	T	-	1
15:78870803:C:T	BIOSQTL	BIOS_eQTL_geneLevel	ENSG00000169684	15	78870803	CHRNA5	T	9.34818e-14	-7.44979	0	T	-	1
15:78873119:C:T	BIOSQTL	BIOS_eQTL_geneLevel	ENSG00000041357	15	78873119	PSMA4	T	6.94325e-19	-8.87571	0	T	-	1
15:78873119:C:T	BIOSQTL	BIOS_eQTL_geneLevel	ENSG00000080644	15	78873119	CHRNA3	T	3.9407e-07	-5.07171	0.000274253	T	-	1
15:78873119:C:T	BIOSQTL	BIOS_eQTL_geneLevel	ENSG00000169684	15	78873119	CHRNA5	T	9.08407e-09	-5.74687	1.76741e-05	T	-	1
15:78873119:C:T	BIOSQTL	BIOS_eQTL_geneLevel	ENSG00000169684	15	78873119	CHRNA5	T	9.34818e-14	-7.44979	0	T	-	1
15:78873976:A:T	BIOSQTL	BIOS_eQTL_geneLevel	ENSG00000041357	15	78873976	PSMA4	A	7.1973e-19	-8.87172	0	A	-	1
15:78873976:A:T	BIOSQTL	BIOS_eQTL_geneLevel	ENSG00000080644	15	78873976	CHRNA3	A	3.9407e-07	-5.07171	0.000274253	A	-	1
15:78873976:A:T	BIOSQTL	BIOS_eQTL_geneLevel	ENSG00000169684	15	78873976	CHRNA5	A	9.08407e-09	-5.74687	1.76741e-05	A	-	1
15:78873976:A:T	BIOSQTL	BIOS_eQTL_geneLevel	ENSG00000169684	15	78873976	CHRNA5	A	9.34818e-14	-7.44979	0	A	-	1
15:78873993:A:T	BIOSQTL	BIOS_eQTL_geneLevel	ENSG00000041357	15	78873993	PSMA4	T	1.49626e-53	15.4059	0	T	+	1
15:78873993:A:T	BIOSQTL	BIOS_eQTL_geneLevel	ENSG00000080644	15	78873993	CHRNA3	T	4.41187e-17	-8.40126	0	T	-	1
15:78873993:A:T	BIOSQTL	BIOS_eQTL_geneLevel	ENSG00000080644	15	78873993	CHRNA3	T	1.88476e-21	-9.51119	0	T	-	1
15:78873993:A:T	BIOSQTL	BIOS_eQTL_geneLevel	ENSG00000136378	15	78873993	ADAMTS7	T	8.35809e-06	-4.45577	0.00579207	T	-	1
15:78873993:A:T	BIOSQTL	BIOS_eQTL_geneLevel	ENSG00000169684	15	78873993	CHRNA5	T	1.35702e-35	-12.4523	0	T	-	1
15:78873993:A:T	BIOSQTL	BIOS_eQTL_geneLevel	ENSG00000169684	15	78873993	CHRNA5	T	5.39565e-20	-9.15571	0	T	-	1
15:78873993:A:T	BIOSQTL	BIOS_eQTL_geneLevel	ENSG00000169684	15	78873993	CHRNA5	T	1.88476e-21	-9.51119	0	T	-	1
15:78873993:A:T	BIOSQTL	BIOS_eQTL_geneLevel	ENSG00000188266	15	78873993	HYKK	T	4.78957e-06	-4.57366	0.00335761	T	-	1
15:78875623:A:G	BIOSQTL	BIOS_eQTL_geneLevel	ENSG00000041357	15	78875623	PSMA4	G	1.41863e-17	-8.53353	0	G	-	1
15:78875623:A:G	BIOSQTL	BIOS_eQTL_geneLevel	ENSG00000080644	15	78875623	CHRNA3	G	7.24047e-07	-4.95468	0.000623745	G	-	1
15:78875623:A:G	BIOSQTL	BIOS_eQTL_geneLevel	ENSG00000169684	15	78875623	CHRNA5	G	3.7017e-09	-5.89698	6.00204e-06	G	-	1
15:78875623:A:G	BIOSQTL	BIOS_eQTL_geneLevel	ENSG00000169684	15	78875623	CHRNA5	G	1.25162e-13	-7.41115	0	G	-	1
15:78877381:A:C	BIOSQTL	BIOS_eQTL_geneLevel	ENSG00000041357	15	78877381	PSMA4	A	1.88685e-53	15.3909	0	A	+	1
15:78877381:A:C	BIOSQTL	BIOS_eQTL_geneLevel	ENSG00000080644	15	78877381	CHRNA3	A	4.41187e-17	-8.40126	0	A	-	1
15:78877381:A:C	BIOSQTL	BIOS_eQTL_geneLevel	ENSG00000080644	15	78877381	CHRNA3	A	1.88476e-21	-9.51119	0	A	-	1
15:78877381:A:C	BIOSQTL	BIOS_eQTL_geneLevel	ENSG00000136378	15	78877381	ADAMTS7	A	8.35809e-06	-4.45577	0.00579207	A	-	1
15:78877381:A:C	BIOSQTL	BIOS_eQTL_geneLevel	ENSG00000169684	15	78877381	CHRNA5	A	1.63748e-35	-12.4373	0	A	-	1
15:78877381:A:C	BIOSQTL	BIOS_eQTL_geneLevel	ENSG00000169684	15	78877381	CHRNA5	A	5.39565e-20	-9.15571	0	A	-	1
15:78877381:A:C	BIOSQTL	BIOS_eQTL_geneLevel	ENSG00000169684	15	78877381	CHRNA5	A	1.88476e-21	-9.51119	0	A	-	1
15:78877381:A:C	BIOSQTL	BIOS_eQTL_geneLevel	ENSG00000188266	15	78877381	HYKK	A	4.78957e-06	-4.57366	0.00335761	A	-	1
15:78878541:A:G	BIOSQTL	BIOS_eQTL_geneLevel	ENSG00000041357	15	78878541	PSMA4	A	1.88685e-53	15.3909	0	A	+	1
15:78878541:A:G	BIOSQTL	BIOS_eQTL_geneLevel	ENSG00000080644	15	78878541	CHRNA3	A	4.41187e-17	-8.40126	0	A	-	1
15:78878541:A:G	BIOSQTL	BIOS_eQTL_geneLevel	ENSG00000080644	15	78878541	CHRNA3	A	1.88476e-21	-9.51119	0	A	-	1
15:78878541:A:G	BIOSQTL	BIOS_eQTL_geneLevel	ENSG00000136378	15	78878541	ADAMTS7	A	8.35809e-06	-4.45577	0.00579207	A	-	1
15:78878541:A:G	BIOSQTL	BIOS_eQTL_geneLevel	ENSG00000169684	15	78878541	CHRNA5	A	1.95579e-35	-12.4231	0	A	-	1
15:78878541:A:G	BIOSQTL	BIOS_eQTL_geneLevel	ENSG00000169684	15	78878541	CHRNA5	A	5.39565e-20	-9.15571	0	A	-	1
15:78878541:A:G	BIOSQTL	BIOS_eQTL_geneLevel	ENSG00000169684	15	78878541	CHRNA5	A	1.88476e-21	-9.51119	0	A	-	1
15:78878541:A:G	BIOSQTL	BIOS_eQTL_geneLevel	ENSG00000188266	15	78878541	HYKK	A	4.47513e-06	-4.58792	0.00318564	A	-	1
15:78882925:A:G	BIOSQTL	BIOS_eQTL_geneLevel	ENSG00000041357	15	78882925	PSMA4	A	1.99659e-52	15.2376	0	A	+	1
15:78882925:A:G	BIOSQTL	BIOS_eQTL_geneLevel	ENSG00000080644	15	78882925	CHRNA3	A	5.61696e-17	-8.37295	0	A	-	1
15:78882925:A:G	BIOSQTL	BIOS_eQTL_geneLevel	ENSG00000080644	15	78882925	CHRNA3	A	4.2038e-21	-9.42731	0	A	-	1
15:78882925:A:G	BIOSQTL	BIOS_eQTL_geneLevel	ENSG00000136378	15	78882925	ADAMTS7	A	8.92924e-06	-4.44148	0.00612205	A	-	1
15:78882925:A:G	BIOSQTL	BIOS_eQTL_geneLevel	ENSG00000169684	15	78882925	CHRNA5	A	6.99964e-35	-12.3206	0	A	-	1
15:78882925:A:G	BIOSQTL	BIOS_eQTL_geneLevel	ENSG00000169684	15	78882925	CHRNA5	A	4.13828e-20	-9.18424	0	A	-	1
15:78882925:A:G	BIOSQTL	BIOS_eQTL_geneLevel	ENSG00000169684	15	78882925	CHRNA5	A	4.2038e-21	-9.42731	0	A	-	1
15:78882925:A:G	BIOSQTL	BIOS_eQTL_geneLevel	ENSG00000188266	15	78882925	HYKK	A	4.47941e-06	-4.58776	0.00318564	A	-	1
15:78883813:A:G	BIOSQTL	BIOS_eQTL_geneLevel	ENSG00000041357	15	78883813	PSMA4	G	2.67343e-19	-8.98139	0	G	-	1
15:78886198:C:T	BIOSQTL	BIOS_eQTL_geneLevel	ENSG00000041357	15	78886198	PSMA4	T	2.52687e-52	15.2221	0	T	+	1
15:78886198:C:T	BIOSQTL	BIOS_eQTL_geneLevel	ENSG00000080644	15	78886198	CHRNA3	T	6.3145e-17	-8.35918	0	T	-	1
15:78886198:C:T	BIOSQTL	BIOS_eQTL_geneLevel	ENSG00000080644	15	78886198	CHRNA3	T	4.79429e-21	-9.41347	0	T	-	1
15:78886198:C:T	BIOSQTL	BIOS_eQTL_geneLevel	ENSG00000136378	15	78886198	ADAMTS7	T	8.92924e-06	-4.44148	0.00612205	T	-	1
15:78886198:C:T	BIOSQTL	BIOS_eQTL_geneLevel	ENSG00000169684	15	78886198	CHRNA5	T	8.34658e-35	-12.3064	0	T	-	1
15:78886198:C:T	BIOSQTL	BIOS_eQTL_geneLevel	ENSG00000169684	15	78886198	CHRNA5	T	4.13828e-20	-9.18424	0	T	-	1
15:78886198:C:T	BIOSQTL	BIOS_eQTL_geneLevel	ENSG00000169684	15	78886198	CHRNA5	T	4.79429e-21	-9.41347	0	T	-	1
15:78886198:C:T	BIOSQTL	BIOS_eQTL_geneLevel	ENSG00000188266	15	78886198	HYKK	T	4.47941e-06	-4.58776	0.00318564	T	-	1
15:78886227:A:G	BIOSQTL	BIOS_eQTL_geneLevel	ENSG00000041357	15	78886227	PSMA4	G	4.52188e-19	-8.92333	0	NA	NA	1
15:78886227:A:G	BIOSQTL	BIOS_eQTL_geneLevel	ENSG00000169684	15	78886227	CHRNA5	G	2.61313e-05	-4.2047	0.0161913	NA	NA	1
15:78886947:A:G	BIOSQTL	BIOS_eQTL_geneLevel	ENSG00000041357	15	78886947	PSMA4	A	2.52687e-52	15.2221	0	A	+	1
15:78886947:A:G	BIOSQTL	BIOS_eQTL_geneLevel	ENSG00000080644	15	78886947	CHRNA3	A	6.3145e-17	-8.35918	0	A	-	1
15:78886947:A:G	BIOSQTL	BIOS_eQTL_geneLevel	ENSG00000080644	15	78886947	CHRNA3	A	4.79429e-21	-9.41347	0	A	-	1
15:78886947:A:G	BIOSQTL	BIOS_eQTL_geneLevel	ENSG00000136378	15	78886947	ADAMTS7	A	8.92924e-06	-4.44148	0.00612205	A	-	1
15:78886947:A:G	BIOSQTL	BIOS_eQTL_geneLevel	ENSG00000169684	15	78886947	CHRNA5	A	1.00497e-34	-12.2915	0	A	-	1
15:78886947:A:G	BIOSQTL	BIOS_eQTL_geneLevel	ENSG00000169684	15	78886947	CHRNA5	A	4.13828e-20	-9.18424	0	A	-	1
15:78886947:A:G	BIOSQTL	BIOS_eQTL_geneLevel	ENSG00000169684	15	78886947	CHRNA5	A	4.79429e-21	-9.41347	0	A	-	1
15:78886947:A:G	BIOSQTL	BIOS_eQTL_geneLevel	ENSG00000188266	15	78886947	HYKK	A	4.18051e-06	-4.60202	0.00299689	A	-	1
15:78888400:A:G	BIOSQTL	BIOS_eQTL_geneLevel	ENSG00000041357	15	78888400	PSMA4	A	1.09264e-18	-8.82519	0	A	-	1
15:78888400:A:G	BIOSQTL	BIOS_eQTL_geneLevel	ENSG00000169684	15	78888400	CHRNA5	A	2.17815e-05	-4.24575	0.0138182	A	-	1
15:78891627:A:G	BIOSQTL	BIOS_eQTL_geneLevel	ENSG00000041357	15	78891627	PSMA4	G	2.29019e-18	-8.74196	0	A	+	1
15:78891627:A:G	BIOSQTL	BIOS_eQTL_geneLevel	ENSG00000080644	15	78891627	CHRNA3	G	2.92836e-07	-5.12799	0.000211531	A	+	1
15:78891627:A:G	BIOSQTL	BIOS_eQTL_geneLevel	ENSG00000169684	15	78891627	CHRNA5	G	3.58426e-08	-5.51017	4.57065e-05	A	+	1
15:78891627:A:G	BIOSQTL	BIOS_eQTL_geneLevel	ENSG00000169684	15	78891627	CHRNA5	G	9.2215e-14	-7.45149	0	A	+	1
15:78892661:C:T	BIOSQTL	BIOS_eQTL_geneLevel	ENSG00000041357	15	78892661	PSMA4	C	2.60134e-18	-8.72754	0	T	+	1
15:78892661:C:T	BIOSQTL	BIOS_eQTL_geneLevel	ENSG00000080644	15	78892661	CHRNA3	C	3.15742e-07	-5.11374	0.000232709	T	+	1
15:78892661:C:T	BIOSQTL	BIOS_eQTL_geneLevel	ENSG00000169684	15	78892661	CHRNA5	C	3.30237e-08	-5.52455	4.57902e-05	T	+	1
15:78892661:C:T	BIOSQTL	BIOS_eQTL_geneLevel	ENSG00000169684	15	78892661	CHRNA5	C	7.3984e-14	-7.48048	0	T	+	1
15:78894339:A:G	BIOSQTL	BIOS_eQTL_geneLevel	ENSG00000041357	15	78894339	PSMA4	A	5.09946e-52	15.1761	0	A	+	1
15:78894339:A:G	BIOSQTL	BIOS_eQTL_geneLevel	ENSG00000080644	15	78894339	CHRNA3	A	6.3145e-17	-8.35918	0	A	-	1
15:78894339:A:G	BIOSQTL	BIOS_eQTL_geneLevel	ENSG00000080644	15	78894339	CHRNA3	A	4.79429e-21	-9.41347	0	A	-	1
15:78894339:A:G	BIOSQTL	BIOS_eQTL_geneLevel	ENSG00000136378	15	78894339	ADAMTS7	A	8.92924e-06	-4.44148	0.00612205	A	-	1
15:78894339:A:G	BIOSQTL	BIOS_eQTL_geneLevel	ENSG00000169684	15	78894339	CHRNA5	A	1.00497e-34	-12.2915	0	A	-	1
15:78894339:A:G	BIOSQTL	BIOS_eQTL_geneLevel	ENSG00000169684	15	78894339	CHRNA5	A	3.15955e-20	-9.21321	0	A	-	1
15:78894339:A:G	BIOSQTL	BIOS_eQTL_geneLevel	ENSG00000169684	15	78894339	CHRNA5	A	4.79429e-21	-9.41347	0	A	-	1
15:78894339:A:G	BIOSQTL	BIOS_eQTL_geneLevel	ENSG00000188266	15	78894339	HYKK	A	4.18051e-06	-4.60202	0.00299689	A	-	1
15:78894759:C:G	BIOSQTL	BIOS_eQTL_geneLevel	ENSG00000041357	15	78894759	PSMA4	C	4.90325e-18	-8.65543	0	G	+	1
15:78894759:C:G	BIOSQTL	BIOS_eQTL_geneLevel	ENSG00000080644	15	78894759	CHRNA3	C	2.92526e-07	-5.12806	0.000211543	G	+	1
15:78894759:C:G	BIOSQTL	BIOS_eQTL_geneLevel	ENSG00000169684	15	78894759	CHRNA5	C	4.54629e-08	-5.46804	4.54623e-05	G	+	1
15:78894759:C:G	BIOSQTL	BIOS_eQTL_geneLevel	ENSG00000169684	15	78894759	CHRNA5	C	6.63995e-14	-7.49462	0	G	+	1
15:78896129:A:G	BIOSQTL	BIOS_eQTL_geneLevel	ENSG00000041357	15	78896129	PSMA4	G	3.21682e-52	15.2063	0	G	+	1
15:78896129:A:G	BIOSQTL	BIOS_eQTL_geneLevel	ENSG00000080644	15	78896129	CHRNA3	G	1.70777e-16	-8.24094	0	G	-	1
15:78896129:A:G	BIOSQTL	BIOS_eQTL_geneLevel	ENSG00000080644	15	78896129	CHRNA3	G	2.37779e-21	-9.48682	0	G	-	1
15:78896129:A:G	BIOSQTL	BIOS_eQTL_geneLevel	ENSG00000136378	15	78896129	ADAMTS7	G	1.63846e-05	-4.30911	0.0106907	G	-	1
15:78896129:A:G	BIOSQTL	BIOS_eQTL_geneLevel	ENSG00000169684	15	78896129	CHRNA5	G	4.76336e-35	-12.3516	0	G	-	1
15:78896129:A:G	BIOSQTL	BIOS_eQTL_geneLevel	ENSG00000169684	15	78896129	CHRNA5	G	1.21723e-20	-9.31517	0	G	-	1
15:78896129:A:G	BIOSQTL	BIOS_eQTL_geneLevel	ENSG00000169684	15	78896129	CHRNA5	G	2.37779e-21	-9.48682	0	G	-	1
15:78896129:A:G	BIOSQTL	BIOS_eQTL_geneLevel	ENSG00000188266	15	78896129	HYKK	G	4.79415e-06	-4.57351	0.00336243	G	-	1
15:78896547:A:G	BIOSQTL	BIOS_eQTL_geneLevel	ENSG00000041357	15	78896547	PSMA4	G	2.50208e-18	-8.73182	0	A	+	1
15:78896547:A:G	BIOSQTL	BIOS_eQTL_geneLevel	ENSG00000080644	15	78896547	CHRNA3	G	1.58673e-07	-5.24214	9.3633e-05	A	+	1
15:78896547:A:G	BIOSQTL	BIOS_eQTL_geneLevel	ENSG00000169684	15	78896547	CHRNA5	G	5.35203e-08	-5.4391	4.52924e-05	A	+	1
15:78896547:A:G	BIOSQTL	BIOS_eQTL_geneLevel	ENSG00000169684	15	78896547	CHRNA5	G	5.94898e-14	-7.50914	0	A	+	1
15:78898723:C:T	BIOSQTL	BIOS_eQTL_geneLevel	ENSG00000041357	15	78898723	PSMA4	T	2.57696e-43	13.7994	0	T	+	1
15:78898723:C:T	BIOSQTL	BIOS_eQTL_geneLevel	ENSG00000080644	15	78898723	CHRNA3	T	5.8783e-11	-6.54668	0	T	-	1
15:78898723:C:T	BIOSQTL	BIOS_eQTL_geneLevel	ENSG00000080644	15	78898723	CHRNA3	T	2.94341e-12	-6.98036	0	T	-	1
15:78898723:C:T	BIOSQTL	BIOS_eQTL_geneLevel	ENSG00000136378	15	78898723	ADAMTS7	T	9.82452e-06	-4.42091	0.00674239	T	-	1
15:78898723:C:T	BIOSQTL	BIOS_eQTL_geneLevel	ENSG00000136381	15	78898723	IREB2	T	4.35664e-06	-4.59354	0.00308824	T	-	1
15:78898723:C:T	BIOSQTL	BIOS_eQTL_geneLevel	ENSG00000169684	15	78898723	CHRNA5	T	5.8783e-11	-6.54668	0	T	-	1
15:78898723:C:T	BIOSQTL	BIOS_eQTL_geneLevel	ENSG00000169684	15	78898723	CHRNA5	T	8.3553e-14	-7.46445	0	T	-	1
15:78898723:C:T	BIOSQTL	BIOS_eQTL_geneLevel	ENSG00000169684	15	78898723	CHRNA5	T	6.4964e-19	-8.88313	0	T	-	1
15:78898932:C:G	BIOSQTL	BIOS_eQTL_geneLevel	ENSG00000041357	15	78898932	PSMA4	G	5.09946e-52	15.1761	0	G	+	1
15:78898932:C:G	BIOSQTL	BIOS_eQTL_geneLevel	ENSG00000080644	15	78898932	CHRNA3	G	5.61696e-17	-8.37295	0	G	-	1
15:78898932:C:G	BIOSQTL	BIOS_eQTL_geneLevel	ENSG00000080644	15	78898932	CHRNA3	G	4.79429e-21	-9.41347	0	G	-	1
15:78898932:C:G	BIOSQTL	BIOS_eQTL_geneLevel	ENSG00000136378	15	78898932	ADAMTS7	G	1.03562e-05	-4.40947	0.00711899	G	-	1
15:78898932:C:G	BIOSQTL	BIOS_eQTL_geneLevel	ENSG00000169684	15	78898932	CHRNA5	G	1.00497e-34	-12.2915	0	G	-	1
15:78898932:C:G	BIOSQTL	BIOS_eQTL_geneLevel	ENSG00000169684	15	78898932	CHRNA5	G	2.42385e-20	-9.24176	0	G	-	1
15:78898932:C:G	BIOSQTL	BIOS_eQTL_geneLevel	ENSG00000169684	15	78898932	CHRNA5	G	4.79429e-21	-9.41347	0	G	-	1
15:78898932:C:G	BIOSQTL	BIOS_eQTL_geneLevel	ENSG00000188266	15	78898932	HYKK	G	4.47941e-06	-4.58776	0.00318564	G	-	1
15:78899003:A:C	BIOSQTL	BIOS_eQTL_geneLevel	ENSG00000041357	15	78899003	PSMA4	A	1.94234e-52	15.2392	0	A	+	1
15:78899003:A:C	BIOSQTL	BIOS_eQTL_geneLevel	ENSG00000080644	15	78899003	CHRNA3	A	3.2503e-17	-8.43704	0	A	-	1
15:78899003:A:C	BIOSQTL	BIOS_eQTL_geneLevel	ENSG00000080644	15	78899003	CHRNA3	A	1.13096e-20	-9.323	0	A	-	1
15:78899003:A:C	BIOSQTL	BIOS_eQTL_geneLevel	ENSG00000136378	15	78899003	ADAMTS7	A	7.4155e-06	-4.48139	0.00509989	A	-	1
15:78899003:A:C	BIOSQTL	BIOS_eQTL_geneLevel	ENSG00000169684	15	78899003	CHRNA5	A	7.7481e-34	-12.1253	0	A	-	1
15:78899003:A:C	BIOSQTL	BIOS_eQTL_geneLevel	ENSG00000169684	15	78899003	CHRNA5	A	8.95039e-20	-9.10085	0	A	-	1
15:78899003:A:C	BIOSQTL	BIOS_eQTL_geneLevel	ENSG00000169684	15	78899003	CHRNA5	A	1.13096e-20	-9.323	0	A	-	1
15:78899003:A:C	BIOSQTL	BIOS_eQTL_geneLevel	ENSG00000188266	15	78899003	HYKK	A	7.25727e-06	-4.48583	0.0050113	A	-	1
15:78899213:C:T	BIOSQTL	BIOS_eQTL_geneLevel	ENSG00000041357	15	78899213	PSMA4	T	2.50208e-18	-8.73182	0	C	+	1
15:78899213:C:T	BIOSQTL	BIOS_eQTL_geneLevel	ENSG00000080644	15	78899213	CHRNA3	T	1.46743e-07	-5.25643	8.83539e-05	C	+	1
15:78899213:C:T	BIOSQTL	BIOS_eQTL_geneLevel	ENSG00000169684	15	78899213	CHRNA5	T	5.35203e-08	-5.4391	4.52924e-05	C	+	1
15:78899213:C:T	BIOSQTL	BIOS_eQTL_geneLevel	ENSG00000169684	15	78899213	CHRNA5	T	5.94898e-14	-7.50914	0	C	+	1
15:78899719:A:G	BIOSQTL	BIOS_eQTL_geneLevel	ENSG00000041357	15	78899719	PSMA4	G	2.50208e-18	-8.73182	0	A	+	1
15:78899719:A:G	BIOSQTL	BIOS_eQTL_geneLevel	ENSG00000080644	15	78899719	CHRNA3	G	1.46743e-07	-5.25643	8.83539e-05	A	+	1
15:78899719:A:G	BIOSQTL	BIOS_eQTL_geneLevel	ENSG00000169684	15	78899719	CHRNA5	G	5.35203e-08	-5.4391	4.52924e-05	A	+	1
15:78899719:A:G	BIOSQTL	BIOS_eQTL_geneLevel	ENSG00000169684	15	78899719	CHRNA5	G	5.94898e-14	-7.50914	0	A	+	1
15:78900647:A:G	BIOSQTL	BIOS_eQTL_geneLevel	ENSG00000041357	15	78900647	PSMA4	G	7.53069e-52	15.1506	0	G	+	1
15:78900647:A:G	BIOSQTL	BIOS_eQTL_geneLevel	ENSG00000080644	15	78900647	CHRNA3	G	4.52603e-17	-8.39835	0	G	-	1
15:78900647:A:G	BIOSQTL	BIOS_eQTL_geneLevel	ENSG00000080644	15	78900647	CHRNA3	G	3.28627e-21	-9.45307	0	G	-	1
15:78900647:A:G	BIOSQTL	BIOS_eQTL_geneLevel	ENSG00000136378	15	78900647	ADAMTS7	G	9.53758e-06	-4.42723	0.00654487	G	-	1
15:78900647:A:G	BIOSQTL	BIOS_eQTL_geneLevel	ENSG00000169684	15	78900647	CHRNA5	G	1.06118e-34	-12.2871	0	G	-	1
15:78900647:A:G	BIOSQTL	BIOS_eQTL_geneLevel	ENSG00000169684	15	78900647	CHRNA5	G	3.64674e-20	-9.19798	0	G	-	1
15:78900647:A:G	BIOSQTL	BIOS_eQTL_geneLevel	ENSG00000169684	15	78900647	CHRNA5	G	3.28627e-21	-9.45307	0	G	-	1
15:78900647:A:G	BIOSQTL	BIOS_eQTL_geneLevel	ENSG00000188266	15	78900647	HYKK	G	3.90454e-06	-4.61628	0.00282426	G	-	1
15:78900650:C:T	BIOSQTL	BIOS_eQTL_geneLevel	ENSG00000041357	15	78900650	PSMA4	T	4.76865e-52	15.1806	0	NA	NA	1
15:78900650:C:T	BIOSQTL	BIOS_eQTL_geneLevel	ENSG00000080644	15	78900650	CHRNA3	T	5.61696e-17	-8.37295	0	NA	NA	1
15:78900650:C:T	BIOSQTL	BIOS_eQTL_geneLevel	ENSG00000080644	15	78900650	CHRNA3	T	4.99927e-21	-9.40913	0	NA	NA	1
15:78900650:C:T	BIOSQTL	BIOS_eQTL_geneLevel	ENSG00000136378	15	78900650	ADAMTS7	T	1.01666e-05	-4.41345	0.00699399	NA	NA	1
15:78900650:C:T	BIOSQTL	BIOS_eQTL_geneLevel	ENSG00000169684	15	78900650	CHRNA5	T	1.00497e-34	-12.2915	0	NA	NA	1
15:78900650:C:T	BIOSQTL	BIOS_eQTL_geneLevel	ENSG00000169684	15	78900650	CHRNA5	T	2.42385e-20	-9.24176	0	NA	NA	1
15:78900650:C:T	BIOSQTL	BIOS_eQTL_geneLevel	ENSG00000169684	15	78900650	CHRNA5	T	4.99927e-21	-9.40913	0	NA	NA	1
15:78900650:C:T	BIOSQTL	BIOS_eQTL_geneLevel	ENSG00000188266	15	78900650	HYKK	T	4.47941e-06	-4.58776	0.00318564	NA	NA	1
15:78900701:G:T	BIOSQTL	BIOS_eQTL_geneLevel	ENSG00000041357	15	78900701	PSMA4	G	4.76865e-52	15.1806	0	G	+	1
15:78900701:G:T	BIOSQTL	BIOS_eQTL_geneLevel	ENSG00000080644	15	78900701	CHRNA3	G	5.61696e-17	-8.37295	0	G	-	1
15:78900701:G:T	BIOSQTL	BIOS_eQTL_geneLevel	ENSG00000080644	15	78900701	CHRNA3	G	4.99927e-21	-9.40913	0	G	-	1
15:78900701:G:T	BIOSQTL	BIOS_eQTL_geneLevel	ENSG00000136378	15	78900701	ADAMTS7	G	1.01666e-05	-4.41345	0.00699399	G	-	1
15:78900701:G:T	BIOSQTL	BIOS_eQTL_geneLevel	ENSG00000169684	15	78900701	CHRNA5	G	1.00497e-34	-12.2915	0	G	-	1
15:78900701:G:T	BIOSQTL	BIOS_eQTL_geneLevel	ENSG00000169684	15	78900701	CHRNA5	G	2.42385e-20	-9.24176	0	G	-	1
15:78900701:G:T	BIOSQTL	BIOS_eQTL_geneLevel	ENSG00000169684	15	78900701	CHRNA5	G	4.99927e-21	-9.40913	0	G	-	1
15:78900701:G:T	BIOSQTL	BIOS_eQTL_geneLevel	ENSG00000188266	15	78900701	HYKK	G	4.47941e-06	-4.58776	0.00318564	G	-	1
15:78900908:C:T	BIOSQTL	BIOS_eQTL_geneLevel	ENSG00000041357	15	78900908	PSMA4	T	1.112e-52	15.2757	0	NA	NA	1
15:78900908:C:T	BIOSQTL	BIOS_eQTL_geneLevel	ENSG00000080644	15	78900908	CHRNA3	T	1.82887e-16	-8.23275	0	NA	NA	1
15:78900908:C:T	BIOSQTL	BIOS_eQTL_geneLevel	ENSG00000080644	15	78900908	CHRNA3	T	6.82637e-21	-9.37635	0	NA	NA	1
15:78900908:C:T	BIOSQTL	BIOS_eQTL_geneLevel	ENSG00000136378	15	78900908	ADAMTS7	T	1.119e-05	-4.39274	0.00762581	NA	NA	1
15:78900908:C:T	BIOSQTL	BIOS_eQTL_geneLevel	ENSG00000169684	15	78900908	CHRNA5	T	3.46284e-34	-12.1912	0	NA	NA	1
15:78900908:C:T	BIOSQTL	BIOS_eQTL_geneLevel	ENSG00000169684	15	78900908	CHRNA5	T	6.888e-20	-9.1293	0	NA	NA	1
15:78900908:C:T	BIOSQTL	BIOS_eQTL_geneLevel	ENSG00000169684	15	78900908	CHRNA5	T	6.82637e-21	-9.37635	0	NA	NA	1
15:78900908:C:T	BIOSQTL	BIOS_eQTL_geneLevel	ENSG00000188266	15	78900908	HYKK	T	3.97663e-06	-4.61244	0.00287278	NA	NA	1
15:78900909:A:G	BIOSQTL	BIOS_eQTL_geneLevel	ENSG00000041357	15	78900909	PSMA4	A	2.21441e-18	-8.7456	0	NA	NA	1
15:78900909:A:G	BIOSQTL	BIOS_eQTL_geneLevel	ENSG00000080644	15	78900909	CHRNA3	A	1.04799e-07	-5.31815	8.35655e-05	NA	NA	1
15:78900909:A:G	BIOSQTL	BIOS_eQTL_geneLevel	ENSG00000169684	15	78900909	CHRNA5	A	4.00117e-08	-5.4906	4.5597e-05	NA	NA	1
15:78900909:A:G	BIOSQTL	BIOS_eQTL_geneLevel	ENSG00000169684	15	78900909	CHRNA5	A	2.86672e-14	-7.6041	0	NA	NA	1
15:78901113:C:T	BIOSQTL	BIOS_eQTL_geneLevel	ENSG00000041357	15	78901113	PSMA4	T	4.76865e-52	15.1806	0	T	+	1
15:78901113:C:T	BIOSQTL	BIOS_eQTL_geneLevel	ENSG00000080644	15	78901113	CHRNA3	T	5.81093e-17	-8.36896	0	T	-	1
15:78901113:C:T	BIOSQTL	BIOS_eQTL_geneLevel	ENSG00000080644	15	78901113	CHRNA3	T	4.35052e-21	-9.42376	0	T	-	1
15:78901113:C:T	BIOSQTL	BIOS_eQTL_geneLevel	ENSG00000136378	15	78901113	ADAMTS7	T	1.01666e-05	-4.41345	0.00699399	T	-	1
15:78901113:C:T	BIOSQTL	BIOS_eQTL_geneLevel	ENSG00000169684	15	78901113	CHRNA5	T	1.06118e-34	-12.2871	0	T	-	1
15:78901113:C:T	BIOSQTL	BIOS_eQTL_geneLevel	ENSG00000169684	15	78901113	CHRNA5	T	2.42385e-20	-9.24176	0	T	-	1
15:78901113:C:T	BIOSQTL	BIOS_eQTL_geneLevel	ENSG00000169684	15	78901113	CHRNA5	T	4.35052e-21	-9.42376	0	T	-	1
15:78901113:C:T	BIOSQTL	BIOS_eQTL_geneLevel	ENSG00000188266	15	78901113	HYKK	T	4.47941e-06	-4.58776	0.00318564	T	-	1
15:78903987:C:T	BIOSQTL	BIOS_eQTL_geneLevel	ENSG00000041357	15	78903987	PSMA4	T	1.0393e-18	-8.83079	0	NA	NA	1
15:78903987:C:T	BIOSQTL	BIOS_eQTL_geneLevel	ENSG00000080644	15	78903987	CHRNA3	T	1.20986e-07	-5.29182	8.33009e-05	NA	NA	1
15:78903987:C:T	BIOSQTL	BIOS_eQTL_geneLevel	ENSG00000169684	15	78903987	CHRNA5	T	1.91505e-07	-5.20736	0.000120548	NA	NA	1
15:78903987:C:T	BIOSQTL	BIOS_eQTL_geneLevel	ENSG00000169684	15	78903987	CHRNA5	T	6.8039e-14	-7.49148	0	NA	NA	1
15:78905854:C:T	BIOSQTL	BIOS_eQTL_geneLevel	ENSG00000041357	15	78905854	PSMA4	C	1.63944e-10	-6.39162	0	NA	NA	1
15:78905854:C:T	BIOSQTL	BIOS_eQTL_geneLevel	ENSG00000169684	15	78905854	CHRNA5	C	4.87375e-05	-4.06153	0.0285187	NA	NA	1
15:78905854:C:T	BIOSQTL	BIOS_eQTL_geneLevel	ENSG00000169684	15	78905854	CHRNA5	C	5.60944e-06	-4.54041	0.00399365	NA	NA	1
15:78906177:A:T	BIOSQTL	BIOS_eQTL_geneLevel	ENSG00000041357	15	78906177	PSMA4	T	2.79506e-52	15.2156	0	T	+	1
15:78906177:A:T	BIOSQTL	BIOS_eQTL_geneLevel	ENSG00000080644	15	78906177	CHRNA3	T	6.97821e-17	-8.3472	0	T	-	1
15:78906177:A:T	BIOSQTL	BIOS_eQTL_geneLevel	ENSG00000080644	15	78906177	CHRNA3	T	4.72183e-21	-9.41509	0	T	-	1
15:78906177:A:T	BIOSQTL	BIOS_eQTL_geneLevel	ENSG00000136378	15	78906177	ADAMTS7	T	9.37101e-06	-4.43116	0.00639467	T	-	1
15:78906177:A:T	BIOSQTL	BIOS_eQTL_geneLevel	ENSG00000169684	15	78906177	CHRNA5	T	1.10949e-34	-12.2834	0	T	-	1
15:78906177:A:T	BIOSQTL	BIOS_eQTL_geneLevel	ENSG00000169684	15	78906177	CHRNA5	T	3.17135e-20	-9.21291	0	T	-	1
15:78906177:A:T	BIOSQTL	BIOS_eQTL_geneLevel	ENSG00000169684	15	78906177	CHRNA5	T	4.72183e-21	-9.41509	0	T	-	1
15:78906177:A:T	BIOSQTL	BIOS_eQTL_geneLevel	ENSG00000188266	15	78906177	HYKK	T	4.56601e-06	-4.58379	0.0032192	T	-	1
15:78907406:C:G	BIOSQTL	BIOS_eQTL_geneLevel	ENSG00000041357	15	78907406	PSMA4	G	4.172e-18	-8.67394	0	G	-	1
15:78907406:C:G	BIOSQTL	BIOS_eQTL_geneLevel	ENSG00000080644	15	78907406	CHRNA3	G	2.94396e-07	-5.12681	0.00021152	G	-	1
15:78907406:C:G	BIOSQTL	BIOS_eQTL_geneLevel	ENSG00000169684	15	78907406	CHRNA5	G	8.00571e-08	-5.36687	6.16454e-05	G	-	1
15:78907406:C:G	BIOSQTL	BIOS_eQTL_geneLevel	ENSG00000169684	15	78907406	CHRNA5	G	1.02998e-13	-7.43682	0	G	-	1
15:78907656:C:T	BIOSQTL	BIOS_eQTL_geneLevel	ENSG00000041357	15	78907656	PSMA4	C	3.80077e-18	-8.68444	0	C	-	1
15:78907656:C:T	BIOSQTL	BIOS_eQTL_geneLevel	ENSG00000080644	15	78907656	CHRNA3	C	2.94396e-07	-5.12681	0.00021152	C	-	1
15:78907656:C:T	BIOSQTL	BIOS_eQTL_geneLevel	ENSG00000169684	15	78907656	CHRNA5	C	8.00571e-08	-5.36687	6.16454e-05	C	-	1
15:78907656:C:T	BIOSQTL	BIOS_eQTL_geneLevel	ENSG00000169684	15	78907656	CHRNA5	C	1.02998e-13	-7.43682	0	C	-	1
15:78907736:A:G	BIOSQTL	BIOS_eQTL_geneLevel	ENSG00000041357	15	78907736	PSMA4	A	5.92549e-10	-6.19221	0	A	-	1
15:78907736:A:G	BIOSQTL	BIOS_eQTL_geneLevel	ENSG00000169684	15	78907736	CHRNA5	A	8.36589e-06	-4.45555	0.00579179	A	-	1
15:78907859:A:C	BIOSQTL	BIOS_eQTL_geneLevel	ENSG00000041357	15	78907859	PSMA4	C	2.19877e-18	-8.74646	0	C	-	1
15:78907859:A:C	BIOSQTL	BIOS_eQTL_geneLevel	ENSG00000080644	15	78907859	CHRNA3	C	3.61859e-07	-5.08798	0.000253315	C	-	1
15:78907859:A:C	BIOSQTL	BIOS_eQTL_geneLevel	ENSG00000169684	15	78907859	CHRNA5	C	5.3882e-08	-5.43791	4.52822e-05	C	-	1
15:78907859:A:C	BIOSQTL	BIOS_eQTL_geneLevel	ENSG00000169684	15	78907859	CHRNA5	C	7.40967e-14	-7.48022	0	C	-	1
15:78908010:C:T	BIOSQTL	BIOS_eQTL_geneLevel	ENSG00000041357	15	78908010	PSMA4	T	4.37466e-18	-8.66847	0	T	-	1
15:78908010:C:T	BIOSQTL	BIOS_eQTL_geneLevel	ENSG00000080644	15	78908010	CHRNA3	T	2.30365e-07	-5.17296	0.000163675	T	-	1
15:78908010:C:T	BIOSQTL	BIOS_eQTL_geneLevel	ENSG00000169684	15	78908010	CHRNA5	T	6.02021e-08	-5.4182	5.07872e-05	T	-	1
15:78908010:C:T	BIOSQTL	BIOS_eQTL_geneLevel	ENSG00000169684	15	78908010	CHRNA5	T	6.10546e-14	-7.50576	0	T	-	1
15:78908032:A:G	BIOSQTL	BIOS_eQTL_geneLevel	ENSG00000041357	15	78908032	PSMA4	G	3.66933e-18	-8.68843	0	G	-	1
15:78908032:A:G	BIOSQTL	BIOS_eQTL_geneLevel	ENSG00000080644	15	78908032	CHRNA3	G	2.67236e-07	-5.14507	0.00019578	G	-	1
15:78908032:A:G	BIOSQTL	BIOS_eQTL_geneLevel	ENSG00000169684	15	78908032	CHRNA5	G	8.00571e-08	-5.36687	6.16454e-05	G	-	1
15:78908032:A:G	BIOSQTL	BIOS_eQTL_geneLevel	ENSG00000169684	15	78908032	CHRNA5	G	9.23549e-14	-7.45128	0	G	-	1
15:78908154:C:G	BIOSQTL	BIOS_eQTL_geneLevel	ENSG00000041357	15	78908154	PSMA4	C	3.54238e-18	-8.69243	0	C	-	1
15:78908154:C:G	BIOSQTL	BIOS_eQTL_geneLevel	ENSG00000080644	15	78908154	CHRNA3	C	2.67236e-07	-5.14507	0.00019578	C	-	1
15:78908154:C:G	BIOSQTL	BIOS_eQTL_geneLevel	ENSG00000169684	15	78908154	CHRNA5	C	8.00571e-08	-5.36687	6.16454e-05	C	-	1
15:78908154:C:G	BIOSQTL	BIOS_eQTL_geneLevel	ENSG00000169684	15	78908154	CHRNA5	C	1.02686e-13	-7.43737	0	C	-	1
15:78908565:C:T	BIOSQTL	BIOS_eQTL_geneLevel	ENSG00000041357	15	78908565	PSMA4	T	5.42017e-17	-8.37707	0	T	-	1
15:78908565:C:T	BIOSQTL	BIOS_eQTL_geneLevel	ENSG00000080644	15	78908565	CHRNA3	T	3.52814e-07	-5.09263	0.000253574	T	-	1
15:78908565:C:T	BIOSQTL	BIOS_eQTL_geneLevel	ENSG00000169684	15	78908565	CHRNA5	T	2.57384e-08	-5.56801	3.45324e-05	T	-	1
15:78908565:C:T	BIOSQTL	BIOS_eQTL_geneLevel	ENSG00000169684	15	78908565	CHRNA5	T	1.42048e-13	-7.39429	0	T	-	1
15:78909070:A:G	BIOSQTL	BIOS_eQTL_geneLevel	ENSG00000041357	15	78909070	PSMA4	G	3.14096e-17	-8.44106	0	G	-	1
15:78909070:A:G	BIOSQTL	BIOS_eQTL_geneLevel	ENSG00000080644	15	78909070	CHRNA3	G	7.61588e-08	-5.3759	6.17215e-05	G	-	1
15:78909070:A:G	BIOSQTL	BIOS_eQTL_geneLevel	ENSG00000169684	15	78909070	CHRNA5	G	2.15841e-08	-5.59868	3.465e-05	G	-	1
15:78909070:A:G	BIOSQTL	BIOS_eQTL_geneLevel	ENSG00000169684	15	78909070	CHRNA5	G	8.2795e-14	-7.46575	0	G	-	1
15:78910258:C:T	BIOSQTL	BIOS_eQTL_geneLevel	ENSG00000041357	15	78910258	PSMA4	T	1.12282e-17	-8.56056	0	T	-	1
15:78910258:C:T	BIOSQTL	BIOS_eQTL_geneLevel	ENSG00000080644	15	78910258	CHRNA3	T	4.16189e-07	-5.06128	0.000295397	T	-	1
15:78910258:C:T	BIOSQTL	BIOS_eQTL_geneLevel	ENSG00000169684	15	78910258	CHRNA5	T	7.05361e-08	-5.38962	6.18534e-05	T	-	1
15:78910258:C:T	BIOSQTL	BIOS_eQTL_geneLevel	ENSG00000169684	15	78910258	CHRNA5	T	2.65162e-13	-7.31099	0	T	-	1
15:78910267:A:C	BIOSQTL	BIOS_eQTL_geneLevel	ENSG00000041357	15	78910267	PSMA4	A	1.75993e-16	-8.23724	0	A	-	1
15:78910267:A:C	BIOSQTL	BIOS_eQTL_geneLevel	ENSG00000080644	15	78910267	CHRNA3	A	6.00675e-07	-4.99086	0.0005153	A	-	1
15:78910267:A:C	BIOSQTL	BIOS_eQTL_geneLevel	ENSG00000169684	15	78910267	CHRNA5	A	2.01626e-08	-5.61048	3.47202e-05	A	-	1
15:78910267:A:C	BIOSQTL	BIOS_eQTL_geneLevel	ENSG00000169684	15	78910267	CHRNA5	A	3.94602e-13	-7.25726	0	A	-	1
15:78911181:C:T	BIOSQTL	BIOS_eQTL_geneLevel	ENSG00000041357	15	78911181	PSMA4	C	3.74993e-42	13.605	0	C	+	1
15:78911181:C:T	BIOSQTL	BIOS_eQTL_geneLevel	ENSG00000080644	15	78911181	CHRNA3	C	1.51838e-09	-6.04235	6.11995e-06	C	-	1
15:78911181:C:T	BIOSQTL	BIOS_eQTL_geneLevel	ENSG00000080644	15	78911181	CHRNA3	C	2.09851e-11	-6.69889	0	C	-	1
15:78911181:C:T	BIOSQTL	BIOS_eQTL_geneLevel	ENSG00000136378	15	78911181	ADAMTS7	C	1.44572e-05	-4.33676	0.0095825	C	-	1
15:78911181:C:T	BIOSQTL	BIOS_eQTL_geneLevel	ENSG00000136381	15	78911181	IREB2	C	4.46882e-05	-4.08162	0.0263077	C	-	1
15:78911181:C:T	BIOSQTL	BIOS_eQTL_geneLevel	ENSG00000169684	15	78911181	CHRNA5	C	1.51838e-09	-6.04235	6.11995e-06	C	-	1
15:78911181:C:T	BIOSQTL	BIOS_eQTL_geneLevel	ENSG00000169684	15	78911181	CHRNA5	C	6.18993e-14	-7.50395	0	C	-	1
15:78911181:C:T	BIOSQTL	BIOS_eQTL_geneLevel	ENSG00000169684	15	78911181	CHRNA5	C	8.14004e-18	-8.59758	0	C	-	1
15:78911672:C:G	BIOSQTL	BIOS_eQTL_geneLevel	ENSG00000041357	15	78911672	PSMA4	C	2.10164e-51	15.0828	0	C	+	1
15:78911672:C:G	BIOSQTL	BIOS_eQTL_geneLevel	ENSG00000080644	15	78911672	CHRNA3	C	3.63223e-17	-8.42413	0	C	-	1
15:78911672:C:G	BIOSQTL	BIOS_eQTL_geneLevel	ENSG00000080644	15	78911672	CHRNA3	C	4.97311e-20	-9.16442	0	C	-	1
15:78911672:C:G	BIOSQTL	BIOS_eQTL_geneLevel	ENSG00000136378	15	78911672	ADAMTS7	C	6.40982e-06	-4.51234	0.00449472	C	-	1
15:78911672:C:G	BIOSQTL	BIOS_eQTL_geneLevel	ENSG00000169684	15	78911672	CHRNA5	C	8.28478e-35	-12.307	0	C	-	1
15:78911672:C:G	BIOSQTL	BIOS_eQTL_geneLevel	ENSG00000169684	15	78911672	CHRNA5	C	4.97311e-20	-9.16442	0	C	-	1
15:78911672:C:G	BIOSQTL	BIOS_eQTL_geneLevel	ENSG00000169684	15	78911672	CHRNA5	C	2.52559e-20	-9.23733	0	C	-	1
15:78911672:C:G	BIOSQTL	BIOS_eQTL_geneLevel	ENSG00000188266	15	78911672	HYKK	C	8.52328e-06	-4.45146	0.00588436	C	-	1
15:78912943:A:G	BIOSQTL	BIOS_eQTL_geneLevel	ENSG00000041357	15	78912943	PSMA4	A	5.58208e-18	-8.64075	0	A	-	1
15:78912943:A:G	BIOSQTL	BIOS_eQTL_geneLevel	ENSG00000080644	15	78912943	CHRNA3	A	3.54646e-05	-4.1351	0.0213935	A	-	1
15:78912943:A:G	BIOSQTL	BIOS_eQTL_geneLevel	ENSG00000080644	15	78912943	CHRNA3	A	9.22917e-07	-4.90726	0.000814033	A	-	1
15:78912943:A:G	BIOSQTL	BIOS_eQTL_geneLevel	ENSG00000169684	15	78912943	CHRNA5	A	3.54646e-05	-4.1351	0.0213935	A	-	1
15:78912943:A:G	BIOSQTL	BIOS_eQTL_geneLevel	ENSG00000169684	15	78912943	CHRNA5	A	2.9817e-07	-5.12451	0.000216837	A	-	1
15:78912943:A:G	BIOSQTL	BIOS_eQTL_geneLevel	ENSG00000169684	15	78912943	CHRNA5	A	1.07454e-13	-7.43129	0	A	-	1
15:78914230:A:C	BIOSQTL	BIOS_eQTL_geneLevel	ENSG00000041357	15	78914230	PSMA4	C	8.42861e-18	-8.59353	0	C	-	1
15:78914230:A:C	BIOSQTL	BIOS_eQTL_geneLevel	ENSG00000080644	15	78914230	CHRNA3	C	4.72965e-05	-4.06853	0.0276976	C	-	1
15:78914230:A:C	BIOSQTL	BIOS_eQTL_geneLevel	ENSG00000080644	15	78914230	CHRNA3	C	1.29709e-06	-4.84009	0.0010929	C	-	1
15:78914230:A:C	BIOSQTL	BIOS_eQTL_geneLevel	ENSG00000169684	15	78914230	CHRNA5	C	4.72965e-05	-4.06853	0.0276976	C	-	1
15:78914230:A:C	BIOSQTL	BIOS_eQTL_geneLevel	ENSG00000169684	15	78914230	CHRNA5	C	3.21818e-07	-5.11014	0.000237915	C	-	1
15:78914230:A:C	BIOSQTL	BIOS_eQTL_geneLevel	ENSG00000169684	15	78914230	CHRNA5	C	1.65087e-13	-7.37427	0	C	-	1
15:78914534:C:T	BIOSQTL	BIOS_eQTL_geneLevel	ENSG00000041357	15	78914534	PSMA4	T	1.2209e-42	13.6868	0	T	+	1
15:78914534:C:T	BIOSQTL	BIOS_eQTL_geneLevel	ENSG00000080644	15	78914534	CHRNA3	T	6.65845e-12	-6.86474	0	T	-	1
15:78914534:C:T	BIOSQTL	BIOS_eQTL_geneLevel	ENSG00000080644	15	78914534	CHRNA3	T	1.50888e-16	-8.25578	0	T	-	1
15:78914534:C:T	BIOSQTL	BIOS_eQTL_geneLevel	ENSG00000136378	15	78914534	ADAMTS7	T	5.08621e-06	-4.56101	0.0035901	T	-	1
15:78914534:C:T	BIOSQTL	BIOS_eQTL_geneLevel	ENSG00000136381	15	78914534	IREB2	T	5.32901e-06	-4.55126	0.0037733	T	-	1
15:78914534:C:T	BIOSQTL	BIOS_eQTL_geneLevel	ENSG00000169684	15	78914534	CHRNA5	T	9.39325e-28	-10.9186	0	T	-	1
15:78914534:C:T	BIOSQTL	BIOS_eQTL_geneLevel	ENSG00000169684	15	78914534	CHRNA5	T	1.50888e-16	-8.25578	0	T	-	1
15:78914534:C:T	BIOSQTL	BIOS_eQTL_geneLevel	ENSG00000169684	15	78914534	CHRNA5	T	5.56003e-17	-8.37404	0	T	-	1
15:78914534:C:T	BIOSQTL	BIOS_eQTL_geneLevel	ENSG00000188266	15	78914534	HYKK	T	1.44047e-05	-4.33753	0.00955043	T	-	1
15:78915245:C:T	BIOSQTL	BIOS_eQTL_geneLevel	ENSG00000041357	15	78915245	PSMA4	T	1.12282e-17	-8.56044	0	T	-	1
15:78915245:C:T	BIOSQTL	BIOS_eQTL_geneLevel	ENSG00000080644	15	78915245	CHRNA3	T	4.63317e-05	-4.07334	0.0272378	T	-	1
15:78915245:C:T	BIOSQTL	BIOS_eQTL_geneLevel	ENSG00000080644	15	78915245	CHRNA3	T	8.87825e-07	-4.91493	0.000804332	T	-	1
15:78915245:C:T	BIOSQTL	BIOS_eQTL_geneLevel	ENSG00000169684	15	78915245	CHRNA5	T	4.63317e-05	-4.07334	0.0272378	T	-	1
15:78915245:C:T	BIOSQTL	BIOS_eQTL_geneLevel	ENSG00000169684	15	78915245	CHRNA5	T	5.04483e-07	-5.02456	0.000400491	T	-	1
15:78915245:C:T	BIOSQTL	BIOS_eQTL_geneLevel	ENSG00000169684	15	78915245	CHRNA5	T	2.20401e-13	-7.3357	0	T	-	1
15:78915864:A:G	BIOSQTL	BIOS_eQTL_geneLevel	ENSG00000041357	15	78915864	PSMA4	A	1.05735e-32	11.9095	0	A	+	1
15:78915864:A:G	BIOSQTL	BIOS_eQTL_geneLevel	ENSG00000080644	15	78915864	CHRNA3	A	1.96943e-07	-5.20202	0.000131399	A	-	1
15:78915864:A:G	BIOSQTL	BIOS_eQTL_geneLevel	ENSG00000080644	15	78915864	CHRNA3	A	7.54143e-09	-5.77829	1.18238e-05	A	-	1
15:78915864:A:G	BIOSQTL	BIOS_eQTL_geneLevel	ENSG00000136378	15	78915864	ADAMTS7	A	9.96184e-06	-4.4178	0.00686627	A	-	1
15:78915864:A:G	BIOSQTL	BIOS_eQTL_geneLevel	ENSG00000136381	15	78915864	IREB2	A	1.80475e-07	-5.2182	0.000109782	A	-	1
15:78915864:A:G	BIOSQTL	BIOS_eQTL_geneLevel	ENSG00000169684	15	78915864	CHRNA5	A	7.54143e-09	-5.77829	1.18238e-05	A	-	1
15:78915864:A:G	BIOSQTL	BIOS_eQTL_geneLevel	ENSG00000169684	15	78915864	CHRNA5	A	9.09139e-12	-6.82019	0	A	-	1
15:78915864:A:G	BIOSQTL	BIOS_eQTL_geneLevel	ENSG00000169684	15	78915864	CHRNA5	A	1.73342e-14	-7.66895	0	A	-	1
15:78915872:A:C	BIOSQTL	BIOS_eQTL_geneLevel	ENSG00000041357	15	78915872	PSMA4	A	5.84275e-25	10.3181	0	A	+	1
15:78915872:A:C	BIOSQTL	BIOS_eQTL_geneLevel	ENSG00000080644	15	78915872	CHRNA3	A	1.58824e-06	-4.79974	0.0013196	A	-	1
15:78915872:A:C	BIOSQTL	BIOS_eQTL_geneLevel	ENSG00000080644	15	78915872	CHRNA3	A	1.73435e-11	-6.72673	0	A	-	1
15:78915872:A:C	BIOSQTL	BIOS_eQTL_geneLevel	ENSG00000169684	15	78915872	CHRNA5	A	8.84755e-05	-3.92004	0.0481396	A	-	1
15:78915872:A:C	BIOSQTL	BIOS_eQTL_geneLevel	ENSG00000169684	15	78915872	CHRNA5	A	1.73435e-11	-6.72673	0	A	-	1
15:78915872:A:C	BIOSQTL	BIOS_eQTL_geneLevel	ENSG00000169684	15	78915872	CHRNA5	A	4.42116e-13	-7.24185	0	A	-	1
15:78920935:C:G	BIOSQTL	BIOS_eQTL_geneLevel	ENSG00000041357	15	78920935	PSMA4	C	1.43839e-17	-8.53185	0	C	-	1
15:78920935:C:G	BIOSQTL	BIOS_eQTL_geneLevel	ENSG00000080644	15	78920935	CHRNA3	C	7.97334e-05	-3.94511	0.0438184	C	-	1
15:78920935:C:G	BIOSQTL	BIOS_eQTL_geneLevel	ENSG00000080644	15	78920935	CHRNA3	C	1.09253e-05	-4.39796	0.00746182	C	-	1
15:78920935:C:G	BIOSQTL	BIOS_eQTL_geneLevel	ENSG00000169684	15	78920935	CHRNA5	C	7.97334e-05	-3.94511	0.0438184	C	-	1
15:78920935:C:G	BIOSQTL	BIOS_eQTL_geneLevel	ENSG00000169684	15	78920935	CHRNA5	C	5.44166e-05	-4.03573	0.0314469	C	-	1
15:78920935:C:G	BIOSQTL	BIOS_eQTL_geneLevel	ENSG00000169684	15	78920935	CHRNA5	C	1.1013e-11	-6.7924	0	C	-	1
15:78922638:A:G	BIOSQTL	BIOS_eQTL_geneLevel	ENSG00000041357	15	78922638	PSMA4	A	2.05402e-46	14.3046	0	A	+	1
15:78922638:A:G	BIOSQTL	BIOS_eQTL_geneLevel	ENSG00000080644	15	78922638	CHRNA3	A	7.21814e-15	-7.78058	0	A	-	1
15:78922638:A:G	BIOSQTL	BIOS_eQTL_geneLevel	ENSG00000080644	15	78922638	CHRNA3	A	1.35819e-19	-9.0555	0	A	-	1
15:78922638:A:G	BIOSQTL	BIOS_eQTL_geneLevel	ENSG00000136378	15	78922638	ADAMTS7	A	4.34413e-06	-4.59404	0.0030884	A	-	1
15:78922638:A:G	BIOSQTL	BIOS_eQTL_geneLevel	ENSG00000136381	15	78922638	IREB2	A	6.72531e-05	-3.98564	0.0378829	A	-	1
15:78922638:A:G	BIOSQTL	BIOS_eQTL_geneLevel	ENSG00000169684	15	78922638	CHRNA5	A	1.34047e-32	-11.8896	0	A	-	1
15:78922638:A:G	BIOSQTL	BIOS_eQTL_geneLevel	ENSG00000169684	15	78922638	CHRNA5	A	3.90582e-19	-8.93945	0	A	-	1
15:78922638:A:G	BIOSQTL	BIOS_eQTL_geneLevel	ENSG00000169684	15	78922638	CHRNA5	A	1.35819e-19	-9.0555	0	A	-	1
15:78922638:A:G	BIOSQTL	BIOS_eQTL_geneLevel	ENSG00000188266	15	78922638	HYKK	A	7.64113e-06	-4.47495	0.00528071	A	-	1
15:78923845:G:T	BIOSQTL	BIOS_eQTL_geneLevel	ENSG00000041357	15	78923845	PSMA4	G	3.14096e-17	-8.44101	0	G	-	1
15:78923845:G:T	BIOSQTL	BIOS_eQTL_geneLevel	ENSG00000080644	15	78923845	CHRNA3	G	5.67337e-05	-4.02595	0.0327652	G	-	1
15:78923845:G:T	BIOSQTL	BIOS_eQTL_geneLevel	ENSG00000080644	15	78923845	CHRNA3	G	1.61492e-05	-4.3122	0.0105013	G	-	1
15:78923845:G:T	BIOSQTL	BIOS_eQTL_geneLevel	ENSG00000169684	15	78923845	CHRNA5	G	5.67337e-05	-4.02595	0.0327652	G	-	1
15:78923845:G:T	BIOSQTL	BIOS_eQTL_geneLevel	ENSG00000169684	15	78923845	CHRNA5	G	5.53513e-05	-4.03176	0.0319914	G	-	1
15:78923845:G:T	BIOSQTL	BIOS_eQTL_geneLevel	ENSG00000169684	15	78923845	CHRNA5	G	7.20143e-12	-6.85347	0	G	-	1
15:78923987:C:T	BIOSQTL	BIOS_eQTL_geneLevel	ENSG00000041357	15	78923987	PSMA4	T	3.65529e-47	14.4241	0	T	+	1
15:78923987:C:T	BIOSQTL	BIOS_eQTL_geneLevel	ENSG00000080644	15	78923987	CHRNA3	T	4.15374e-15	-7.85006	0	T	-	1
15:78923987:C:T	BIOSQTL	BIOS_eQTL_geneLevel	ENSG00000080644	15	78923987	CHRNA3	T	2.58286e-20	-9.23499	0	T	-	1
15:78923987:C:T	BIOSQTL	BIOS_eQTL_geneLevel	ENSG00000136378	15	78923987	ADAMTS7	T	4.16848e-06	-4.60261	0.00299218	T	-	1
15:78923987:C:T	BIOSQTL	BIOS_eQTL_geneLevel	ENSG00000169684	15	78923987	CHRNA5	T	1.07011e-32	-11.9082	0	T	-	1
15:78923987:C:T	BIOSQTL	BIOS_eQTL_geneLevel	ENSG00000169684	15	78923987	CHRNA5	T	3.77377e-19	-8.94321	0	T	-	1
15:78923987:C:T	BIOSQTL	BIOS_eQTL_geneLevel	ENSG00000169684	15	78923987	CHRNA5	T	2.58286e-20	-9.23499	0	T	-	1
15:78923987:C:T	BIOSQTL	BIOS_eQTL_geneLevel	ENSG00000188266	15	78923987	HYKK	T	1.17164e-05	-4.38264	0.00793827	T	-	1
15:78925435:A:G	BIOSQTL	BIOS_eQTL_geneLevel	ENSG00000041357	15	78925435	PSMA4	G	3.55854e-17	-8.42649	0	G	-	1
15:78925435:A:G	BIOSQTL	BIOS_eQTL_geneLevel	ENSG00000080644	15	78925435	CHRNA3	G	4.41148e-05	-4.08471	0.0260428	G	-	1
15:78925435:A:G	BIOSQTL	BIOS_eQTL_geneLevel	ENSG00000080644	15	78925435	CHRNA3	G	1.61492e-05	-4.3122	0.0105013	G	-	1
15:78925435:A:G	BIOSQTL	BIOS_eQTL_geneLevel	ENSG00000169684	15	78925435	CHRNA5	G	6.46397e-05	-3.99515	0.0367446	G	-	1
15:78925435:A:G	BIOSQTL	BIOS_eQTL_geneLevel	ENSG00000169684	15	78925435	CHRNA5	G	4.41148e-05	-4.08471	0.0260428	G	-	1
15:78925435:A:G	BIOSQTL	BIOS_eQTL_geneLevel	ENSG00000169684	15	78925435	CHRNA5	G	7.05187e-12	-6.85656	0	G	-	1
15:78926445:C:T	BIOSQTL	BIOS_eQTL_geneLevel	ENSG00000041357	15	78926445	PSMA4	C	2.65247e-46	14.2866	0	C	+	1
15:78926445:C:T	BIOSQTL	BIOS_eQTL_geneLevel	ENSG00000080644	15	78926445	CHRNA3	C	2.09596e-14	-7.64443	0	C	-	1
15:78926445:C:T	BIOSQTL	BIOS_eQTL_geneLevel	ENSG00000080644	15	78926445	CHRNA3	C	6.51981e-19	-8.88268	0	C	-	1
15:78926445:C:T	BIOSQTL	BIOS_eQTL_geneLevel	ENSG00000136378	15	78926445	ADAMTS7	C	7.01608e-06	-4.49303	0.00490384	C	-	1
15:78926445:C:T	BIOSQTL	BIOS_eQTL_geneLevel	ENSG00000136381	15	78926445	IREB2	C	6.40961e-05	-3.99719	0.0364495	C	-	1
15:78926445:C:T	BIOSQTL	BIOS_eQTL_geneLevel	ENSG00000169684	15	78926445	CHRNA5	C	2.94748e-30	-11.4302	0	C	-	1
15:78926445:C:T	BIOSQTL	BIOS_eQTL_geneLevel	ENSG00000169684	15	78926445	CHRNA5	C	6.51981e-19	-8.88268	0	C	-	1
15:78926445:C:T	BIOSQTL	BIOS_eQTL_geneLevel	ENSG00000169684	15	78926445	CHRNA5	C	6.31208e-19	-8.88636	0	C	-	1
15:78926445:C:T	BIOSQTL	BIOS_eQTL_geneLevel	ENSG00000188266	15	78926445	HYKK	C	4.05e-06	-4.60869	0.00290604	C	-	1
15:78926726:C:G	BIOSQTL	BIOS_eQTL_geneLevel	ENSG00000041357	15	78926726	PSMA4	G	1.66115e-19	-9.03351	0	G	-	1
15:78926726:C:G	BIOSQTL	BIOS_eQTL_geneLevel	ENSG00000169684	15	78926726	CHRNA5	G	9.70425e-10	-6.11409	6.18009e-06	G	-	1
15:78928264:G:T	BIOSQTL	BIOS_eQTL_geneLevel	ENSG00000041357	15	78928264	PSMA4	G	4.45399e-14	-7.54699	0	T	+	1
15:78928264:G:T	BIOSQTL	BIOS_eQTL_geneLevel	ENSG00000136381	15	78928264	IREB2	G	2.95639e-05	4.17699	0.018117	T	-	1
15:78928399:A:G	BIOSQTL	BIOS_eQTL_geneLevel	ENSG00000041357	15	78928399	PSMA4	G	6.21867e-13	-7.19558	0	A	+	1
15:78928399:A:G	BIOSQTL	BIOS_eQTL_geneLevel	ENSG00000169684	15	78928399	CHRNA5	G	5.10298e-07	-5.02224	0.000400342	A	+	1
15:78928878:A:G	BIOSQTL	BIOS_eQTL_geneLevel	ENSG00000041357	15	78928878	PSMA4	A	7.43432e-13	-7.17107	0	G	+	1
15:78928878:A:G	BIOSQTL	BIOS_eQTL_geneLevel	ENSG00000169684	15	78928878	CHRNA5	A	1.47495e-06	-4.81453	0.00121344	G	+	1
15:78929372:A:G	BIOSQTL	BIOS_eQTL_geneLevel	ENSG00000041357	15	78929372	PSMA4	G	8.11492e-13	-7.15902	0	A	+	1
15:78929372:A:G	BIOSQTL	BIOS_eQTL_geneLevel	ENSG00000169684	15	78929372	CHRNA5	G	5.16715e-07	-5.01998	0.000410952	A	+	1
15:78929478:G:T	BIOSQTL	BIOS_eQTL_geneLevel	ENSG00000041357	15	78929478	PSMA4	T	9.86337e-13	-7.13234	0	G	+	1
15:78929478:G:T	BIOSQTL	BIOS_eQTL_geneLevel	ENSG00000169684	15	78929478	CHRNA5	T	1.31416e-06	-4.83753	0.00111313	G	+	1
15:78931057:A:G	BIOSQTL	BIOS_eQTL_geneLevel	ENSG00000041357	15	78931057	PSMA4	A	1.10529e-10	-6.45172	0	G	+	1
15:78931057:A:G	BIOSQTL	BIOS_eQTL_geneLevel	ENSG00000169684	15	78931057	CHRNA5	A	8.04687e-05	-3.94284	0.0442467	G	+	1
15:78934318:C:G	BIOSQTL	BIOS_eQTL_geneLevel	ENSG00000041357	15	78934318	PSMA4	G	1.31503e-32	11.8913	0	G	+	1
15:78934318:C:G	BIOSQTL	BIOS_eQTL_geneLevel	ENSG00000080644	15	78934318	CHRNA3	G	6.33829e-13	-7.19287	0	G	-	1
15:78934318:C:G	BIOSQTL	BIOS_eQTL_geneLevel	ENSG00000080644	15	78934318	CHRNA3	G	2.55926e-19	-8.98602	0	G	-	1
15:78934318:C:G	BIOSQTL	BIOS_eQTL_geneLevel	ENSG00000136378	15	78934318	ADAMTS7	G	1.07853e-05	-4.40064	0.00735493	G	-	1
15:78934318:C:G	BIOSQTL	BIOS_eQTL_geneLevel	ENSG00000169684	15	78934318	CHRNA5	G	1.01455e-27	-10.9115	0	G	-	1
15:78934318:C:G	BIOSQTL	BIOS_eQTL_geneLevel	ENSG00000169684	15	78934318	CHRNA5	G	3.94071e-15	-7.85671	0	G	-	1
15:78934318:C:G	BIOSQTL	BIOS_eQTL_geneLevel	ENSG00000169684	15	78934318	CHRNA5	G	2.55926e-19	-8.98602	0	G	-	1
15:78934318:C:G	BIOSQTL	BIOS_eQTL_geneLevel	ENSG00000185787	15	78934318	MORF4L1	G	2.99035e-05	-4.17414	0.0183143	G	-	1
15:78934318:C:G	BIOSQTL	BIOS_eQTL_geneLevel	ENSG00000188266	15	78934318	HYKK	G	1.22346e-06	-4.8518	0.00104205	G	-	1
15:78934551:A:G	BIOSQTL	BIOS_eQTL_geneLevel	ENSG00000041357	15	78934551	PSMA4	G	3.61148e-11	-6.61902	0	A	+	1
15:78934551:A:G	BIOSQTL	BIOS_eQTL_geneLevel	ENSG00000169684	15	78934551	CHRNA5	G	4.36082e-06	-4.59324	0.00308824	A	+	1
15:78936168:A:G	BIOSQTL	BIOS_eQTL_geneLevel	ENSG00000041357	15	78936168	PSMA4	G	1.86913e-32	11.862	0	G	+	1
15:78936168:A:G	BIOSQTL	BIOS_eQTL_geneLevel	ENSG00000080644	15	78936168	CHRNA3	G	4.49347e-13	-7.23973	0	G	-	1
15:78936168:A:G	BIOSQTL	BIOS_eQTL_geneLevel	ENSG00000080644	15	78936168	CHRNA3	G	2.9065e-19	-8.97217	0	G	-	1
15:78936168:A:G	BIOSQTL	BIOS_eQTL_geneLevel	ENSG00000136378	15	78936168	ADAMTS7	G	8.49949e-06	-4.45211	0.00586569	G	-	1
15:78936168:A:G	BIOSQTL	BIOS_eQTL_geneLevel	ENSG00000169684	15	78936168	CHRNA5	G	7.38733e-28	-10.9403	0	G	-	1
15:78936168:A:G	BIOSQTL	BIOS_eQTL_geneLevel	ENSG00000169684	15	78936168	CHRNA5	G	5.7188e-15	-7.80995	0	G	-	1
15:78936168:A:G	BIOSQTL	BIOS_eQTL_geneLevel	ENSG00000169684	15	78936168	CHRNA5	G	2.9065e-19	-8.97217	0	G	-	1
15:78936168:A:G	BIOSQTL	BIOS_eQTL_geneLevel	ENSG00000185787	15	78936168	MORF4L1	G	3.18248e-05	-4.15986	0.0193868	G	-	1
15:78936168:A:G	BIOSQTL	BIOS_eQTL_geneLevel	ENSG00000188266	15	78936168	HYKK	G	1.17149e-06	-4.86037	0.0009964	G	-	1
15:78944538:A:G	BIOSQTL	BIOS_eQTL_geneLevel	ENSG00000041357	15	78944538	PSMA4	G	3.05072e-26	10.598	0	G	+	1
15:78944538:A:G	BIOSQTL	BIOS_eQTL_geneLevel	ENSG00000080644	15	78944538	CHRNA3	G	5.01338e-07	-5.02562	0.000395172	G	-	1
15:78944538:A:G	BIOSQTL	BIOS_eQTL_geneLevel	ENSG00000136378	15	78944538	ADAMTS7	G	5.07383e-05	-4.05206	0.0294691	G	-	1
15:78944538:A:G	BIOSQTL	BIOS_eQTL_geneLevel	ENSG00000169684	15	78944538	CHRNA5	G	3.47003e-05	-4.14019	0.0209425	G	-	1
15:78944538:A:G	BIOSQTL	BIOS_eQTL_geneLevel	ENSG00000169684	15	78944538	CHRNA5	G	3.57206e-08	-5.5107	4.57091e-05	G	-	1
15:78944718:A:G	BIOSQTL	BIOS_eQTL_geneLevel	ENSG00000041357	15	78944718	PSMA4	A	3.05072e-26	10.5979	0	A	+	1
15:78944718:A:G	BIOSQTL	BIOS_eQTL_geneLevel	ENSG00000080644	15	78944718	CHRNA3	A	8.8549e-05	-3.91986	0.0481766	A	-	1
15:78944718:A:G	BIOSQTL	BIOS_eQTL_geneLevel	ENSG00000080644	15	78944718	CHRNA3	A	4.90992e-07	-5.02962	0.000379395	A	-	1
15:78944718:A:G	BIOSQTL	BIOS_eQTL_geneLevel	ENSG00000136378	15	78944718	ADAMTS7	A	5.15249e-05	-4.04858	0.0299179	A	-	1
15:78944718:A:G	BIOSQTL	BIOS_eQTL_geneLevel	ENSG00000169684	15	78944718	CHRNA5	A	8.8549e-05	-3.91986	0.0481766	A	-	1
15:78944718:A:G	BIOSQTL	BIOS_eQTL_geneLevel	ENSG00000169684	15	78944718	CHRNA5	A	3.47003e-05	-4.14019	0.0209425	A	-	1
15:78944718:A:G	BIOSQTL	BIOS_eQTL_geneLevel	ENSG00000169684	15	78944718	CHRNA5	A	3.03163e-08	-5.53944	4.58716e-05	A	-	1
15:78947611:A:G	BIOSQTL	BIOS_eQTL_geneLevel	ENSG00000041357	15	78947611	PSMA4	A	7.38373e-26	10.5148	0	A	+	1
15:78947611:A:G	BIOSQTL	BIOS_eQTL_geneLevel	ENSG00000080644	15	78947611	CHRNA3	A	7.64067e-05	-3.95539	0.042187	A	-	1
15:78947611:A:G	BIOSQTL	BIOS_eQTL_geneLevel	ENSG00000080644	15	78947611	CHRNA3	A	1.08039e-06	-4.87631	0.000940635	A	-	1
15:78947611:A:G	BIOSQTL	BIOS_eQTL_geneLevel	ENSG00000136378	15	78947611	ADAMTS7	A	8.33354e-05	-3.93451	0.0456056	A	-	1
15:78947611:A:G	BIOSQTL	BIOS_eQTL_geneLevel	ENSG00000169684	15	78947611	CHRNA5	A	7.64067e-05	-3.95539	0.042187	A	-	1
15:78947611:A:G	BIOSQTL	BIOS_eQTL_geneLevel	ENSG00000169684	15	78947611	CHRNA5	A	6.388e-05	-3.99783	0.0363314	A	-	1
15:78947611:A:G	BIOSQTL	BIOS_eQTL_geneLevel	ENSG00000169684	15	78947611	CHRNA5	A	3.9876e-08	-5.49138	4.55996e-05	A	-	1
15:78948319:C:G	BIOSQTL	BIOS_eQTL_geneLevel	ENSG00000041357	15	78948319	PSMA4	C	7.73647e-26	10.5106	0	C	+	1
15:78948319:C:G	BIOSQTL	BIOS_eQTL_geneLevel	ENSG00000080644	15	78948319	CHRNA3	C	5.93954e-05	-4.01503	0.0341004	C	-	1
15:78948319:C:G	BIOSQTL	BIOS_eQTL_geneLevel	ENSG00000080644	15	78948319	CHRNA3	C	8.83304e-07	-4.9158	0.000804501	C	-	1
15:78948319:C:G	BIOSQTL	BIOS_eQTL_geneLevel	ENSG00000136378	15	78948319	ADAMTS7	C	7.67912e-05	-3.95411	0.0423747	C	-	1
15:78948319:C:G	BIOSQTL	BIOS_eQTL_geneLevel	ENSG00000169684	15	78948319	CHRNA5	C	5.93954e-05	-4.01503	0.0341004	C	-	1
15:78948319:C:G	BIOSQTL	BIOS_eQTL_geneLevel	ENSG00000169684	15	78948319	CHRNA5	C	4.54248e-05	-4.07785	0.0267697	C	-	1
15:78948319:C:G	BIOSQTL	BIOS_eQTL_geneLevel	ENSG00000169684	15	78948319	CHRNA5	C	2.04442e-08	-5.60815	3.47062e-05	C	-	1
15:78954379:A:G	BIOSQTL	BIOS_eQTL_geneLevel	ENSG00000041357	15	78954379	PSMA4	G	1.00392e-25	10.4859	0	G	+	1
15:78954379:A:G	BIOSQTL	BIOS_eQTL_geneLevel	ENSG00000080644	15	78954379	CHRNA3	G	6.28093e-05	-4.00195	0.0358198	G	-	1
15:78954379:A:G	BIOSQTL	BIOS_eQTL_geneLevel	ENSG00000080644	15	78954379	CHRNA3	G	1.46758e-06	-4.81543	0.00120844	G	-	1
15:78954379:A:G	BIOSQTL	BIOS_eQTL_geneLevel	ENSG00000169684	15	78954379	CHRNA5	G	6.6129e-05	-3.98962	0.0373695	G	-	1
15:78954379:A:G	BIOSQTL	BIOS_eQTL_geneLevel	ENSG00000169684	15	78954379	CHRNA5	G	6.28093e-05	-4.00195	0.0358198	G	-	1
15:78954379:A:G	BIOSQTL	BIOS_eQTL_geneLevel	ENSG00000169684	15	78954379	CHRNA5	G	2.96654e-08	-5.54324	4.59005e-05	G	-	1
15:78956806:C:T	BIOSQTL	BIOS_eQTL_geneLevel	ENSG00000041357	15	78956806	PSMA4	C	1.0189e-25	10.4845	0	C	+	1
15:78956806:C:T	BIOSQTL	BIOS_eQTL_geneLevel	ENSG00000080644	15	78956806	CHRNA3	C	6.207e-05	-4.00464	0.0354456	C	-	1
15:78956806:C:T	BIOSQTL	BIOS_eQTL_geneLevel	ENSG00000080644	15	78956806	CHRNA3	C	1.24461e-06	-4.84832	0.00105214	C	-	1
15:78956806:C:T	BIOSQTL	BIOS_eQTL_geneLevel	ENSG00000136378	15	78956806	ADAMTS7	C	9.04042e-05	-3.91482	0.049188	C	-	1
15:78956806:C:T	BIOSQTL	BIOS_eQTL_geneLevel	ENSG00000169684	15	78956806	CHRNA5	C	6.207e-05	-4.00464	0.0354456	C	-	1
15:78956806:C:T	BIOSQTL	BIOS_eQTL_geneLevel	ENSG00000169684	15	78956806	CHRNA5	C	4.72559e-05	-4.06874	0.027675	C	-	1
15:78956806:C:T	BIOSQTL	BIOS_eQTL_geneLevel	ENSG00000169684	15	78956806	CHRNA5	C	2.96654e-08	-5.54324	4.59005e-05	C	-	1
15:78960529:A:C	BIOSQTL	BIOS_eQTL_geneLevel	ENSG00000041357	15	78960529	PSMA4	C	1.26939e-25	10.4638	0	C	+	1
15:78960529:A:C	BIOSQTL	BIOS_eQTL_geneLevel	ENSG00000080644	15	78960529	CHRNA3	C	8.29891e-05	-3.93548	0.0454141	C	-	1
15:78960529:A:C	BIOSQTL	BIOS_eQTL_geneLevel	ENSG00000080644	15	78960529	CHRNA3	C	1.7935e-06	-4.7752	0.001407	C	-	1
15:78960529:A:C	BIOSQTL	BIOS_eQTL_geneLevel	ENSG00000136378	15	78960529	ADAMTS7	C	4.27669e-05	-4.09181	0.0253755	C	-	1
15:78960529:A:C	BIOSQTL	BIOS_eQTL_geneLevel	ENSG00000169684	15	78960529	CHRNA5	C	8.29891e-05	-3.93548	0.0454141	C	-	1
15:78960529:A:C	BIOSQTL	BIOS_eQTL_geneLevel	ENSG00000169684	15	78960529	CHRNA5	C	6.89733e-05	-3.9798	0.0387847	C	-	1
15:78960529:A:C	BIOSQTL	BIOS_eQTL_geneLevel	ENSG00000169684	15	78960529	CHRNA5	C	9.86463e-08	-5.32914	8.36727e-05	C	-	1
15:78962964:C:T	BIOSQTL	BIOS_eQTL_geneLevel	ENSG00000041357	15	78962964	PSMA4	T	2.61786e-22	9.71452	0	NA	NA	1
15:78962964:C:T	BIOSQTL	BIOS_eQTL_geneLevel	ENSG00000080644	15	78962964	CHRNA3	T	1.57449e-05	-4.31784	0.0102885	NA	NA	1
15:78962964:C:T	BIOSQTL	BIOS_eQTL_geneLevel	ENSG00000136378	15	78962964	ADAMTS7	T	4.31745e-05	-4.08979	0.0256052	NA	NA	1
15:78962964:C:T	BIOSQTL	BIOS_eQTL_geneLevel	ENSG00000169684	15	78962964	CHRNA5	T	2.45372e-07	-5.16102	0.000174368	NA	NA	1
15:78966655:C:T	BIOSQTL	BIOS_eQTL_geneLevel	ENSG00000041357	15	78966655	PSMA4	T	4.75324e-25	10.338	0	T	+	1
15:78966655:C:T	BIOSQTL	BIOS_eQTL_geneLevel	ENSG00000080644	15	78966655	CHRNA3	T	2.86037e-06	-4.6804	0.00215338	T	-	1
15:78966655:C:T	BIOSQTL	BIOS_eQTL_geneLevel	ENSG00000136378	15	78966655	ADAMTS7	T	6.207e-05	-4.0047	0.0354456	T	-	1
15:78966655:C:T	BIOSQTL	BIOS_eQTL_geneLevel	ENSG00000169684	15	78966655	CHRNA5	T	1.6951e-07	-5.22999	9.89664e-05	T	-	1
15:78967401:A:G	BIOSQTL	BIOS_eQTL_geneLevel	ENSG00000041357	15	78967401	PSMA4	G	4.27319e-25	10.3482	0	G	+	1
15:78967401:A:G	BIOSQTL	BIOS_eQTL_geneLevel	ENSG00000080644	15	78967401	CHRNA3	G	2.86037e-06	-4.6804	0.00215338	G	-	1
15:78967401:A:G	BIOSQTL	BIOS_eQTL_geneLevel	ENSG00000136378	15	78967401	ADAMTS7	G	6.48036e-05	-3.99452	0.0368001	G	-	1
15:78967401:A:G	BIOSQTL	BIOS_eQTL_geneLevel	ENSG00000169684	15	78967401	CHRNA5	G	8.47341e-05	-3.93041	0.0462514	G	-	1
15:78967401:A:G	BIOSQTL	BIOS_eQTL_geneLevel	ENSG00000169684	15	78967401	CHRNA5	G	1.87219e-07	-5.21153	0.000120627	G	-	1
15:78968179:C:G	BIOSQTL	BIOS_eQTL_geneLevel	ENSG00000041357	15	78968179	PSMA4	C	4.27319e-25	10.3482	0	C	+	1
15:78968179:C:G	BIOSQTL	BIOS_eQTL_geneLevel	ENSG00000080644	15	78968179	CHRNA3	C	2.91955e-06	-4.67639	0.002193	C	-	1
15:78968179:C:G	BIOSQTL	BIOS_eQTL_geneLevel	ENSG00000136378	15	78968179	ADAMTS7	C	6.87994e-05	-3.98032	0.0386608	C	-	1
15:78968179:C:G	BIOSQTL	BIOS_eQTL_geneLevel	ENSG00000169684	15	78968179	CHRNA5	C	8.61551e-05	-3.92643	0.0469192	C	-	1
15:78968179:C:G	BIOSQTL	BIOS_eQTL_geneLevel	ENSG00000169684	15	78968179	CHRNA5	C	2.02313e-07	-5.19717	0.000131349	C	-	1
15:78968229:C:T	BIOSQTL	BIOS_eQTL_geneLevel	ENSG00000041357	15	78968229	PSMA4	T	4.27319e-25	10.3482	0	T	+	1
15:78968229:C:T	BIOSQTL	BIOS_eQTL_geneLevel	ENSG00000080644	15	78968229	CHRNA3	T	2.91955e-06	-4.67639	0.002193	T	-	1
15:78968229:C:T	BIOSQTL	BIOS_eQTL_geneLevel	ENSG00000136378	15	78968229	ADAMTS7	T	6.87994e-05	-3.98032	0.0386608	T	-	1
15:78968229:C:T	BIOSQTL	BIOS_eQTL_geneLevel	ENSG00000169684	15	78968229	CHRNA5	T	8.61551e-05	-3.92643	0.0469192	T	-	1
15:78968229:C:T	BIOSQTL	BIOS_eQTL_geneLevel	ENSG00000169684	15	78968229	CHRNA5	T	2.02313e-07	-5.19717	0.000131349	T	-	1
15:78968268:G:T	BIOSQTL	BIOS_eQTL_geneLevel	ENSG00000041357	15	78968268	PSMA4	G	1.89814e-19	9.0191	0	G	+	1
15:78968268:G:T	BIOSQTL	BIOS_eQTL_geneLevel	ENSG00000080644	15	78968268	CHRNA3	G	1.92687e-05	-4.27318	0.012513	G	-	1
15:78968268:G:T	BIOSQTL	BIOS_eQTL_geneLevel	ENSG00000080644	15	78968268	CHRNA3	G	1.60751e-07	-5.23961	9.3602e-05	G	-	1
15:78968268:G:T	BIOSQTL	BIOS_eQTL_geneLevel	ENSG00000169684	15	78968268	CHRNA5	G	1.92687e-05	-4.27318	0.012513	G	-	1
15:78968268:G:T	BIOSQTL	BIOS_eQTL_geneLevel	ENSG00000169684	15	78968268	CHRNA5	G	1.33676e-05	-4.35386	0.00895708	G	-	1
15:78968268:G:T	BIOSQTL	BIOS_eQTL_geneLevel	ENSG00000169684	15	78968268	CHRNA5	G	1.12442e-10	-6.44912	0	G	-	1
15:78969256:C:T	BIOSQTL	BIOS_eQTL_geneLevel	ENSG00000041357	15	78969256	PSMA4	T	4.46474e-25	10.344	0	T	+	1
15:78969256:C:T	BIOSQTL	BIOS_eQTL_geneLevel	ENSG00000080644	15	78969256	CHRNA3	T	2.72938e-06	-4.69003	0.0020595	T	-	1
15:78969256:C:T	BIOSQTL	BIOS_eQTL_geneLevel	ENSG00000136378	15	78969256	ADAMTS7	T	7.30276e-05	-3.96612	0.0406157	T	-	1
15:78969256:C:T	BIOSQTL	BIOS_eQTL_geneLevel	ENSG00000169684	15	78969256	CHRNA5	T	8.58691e-05	-3.9272	0.0468165	T	-	1
15:78969256:C:T	BIOSQTL	BIOS_eQTL_geneLevel	ENSG00000169684	15	78969256	CHRNA5	T	2.02313e-07	-5.19717	0.000131349	T	-	1
15:78969385:G:T	BIOSQTL	BIOS_eQTL_geneLevel	ENSG00000041357	15	78969385	PSMA4	G	7.00232e-25	10.3008	0	G	+	1
15:78969385:G:T	BIOSQTL	BIOS_eQTL_geneLevel	ENSG00000080644	15	78969385	CHRNA3	G	2.72938e-06	-4.69003	0.0020595	G	-	1
15:78969385:G:T	BIOSQTL	BIOS_eQTL_geneLevel	ENSG00000136378	15	78969385	ADAMTS7	G	7.75007e-05	-3.95185	0.042648	G	-	1
15:78969385:G:T	BIOSQTL	BIOS_eQTL_geneLevel	ENSG00000169684	15	78969385	CHRNA5	G	7.6279e-05	-3.95561	0.042118	G	-	1
15:78969385:G:T	BIOSQTL	BIOS_eQTL_geneLevel	ENSG00000169684	15	78969385	CHRNA5	G	1.37468e-07	-5.26841	8.85152e-05	G	-	1
15:78975855:A:T	BIOSQTL	BIOS_eQTL_geneLevel	ENSG00000041357	15	78975855	PSMA4	T	5.33265e-23	9.8753	0	T	+	1
15:78975855:A:T	BIOSQTL	BIOS_eQTL_geneLevel	ENSG00000080644	15	78975855	CHRNA3	T	4.3358e-06	-4.59453	0.00308355	T	-	1
15:78975855:A:T	BIOSQTL	BIOS_eQTL_geneLevel	ENSG00000136378	15	78975855	ADAMTS7	T	7.49498e-05	-3.95986	0.0416407	T	-	1
15:78975855:A:T	BIOSQTL	BIOS_eQTL_geneLevel	ENSG00000169684	15	78975855	CHRNA5	T	2.02213e-06	-4.75115	0.00157044	T	-	1
15:78978364:C:T	BIOSQTL	BIOS_eQTL_geneLevel	ENSG00000041357	15	78978364	PSMA4	T	1.90263e-23	9.97808	0	T	+	1
15:78978364:C:T	BIOSQTL	BIOS_eQTL_geneLevel	ENSG00000080644	15	78978364	CHRNA3	T	7.08896e-06	-4.49085	0.00491126	T	-	1
15:78978364:C:T	BIOSQTL	BIOS_eQTL_geneLevel	ENSG00000103811	15	78978364	CTSH	T	3.92655e-12	6.93997	0	T	+	1
15:78978364:C:T	BIOSQTL	BIOS_eQTL_geneLevel	ENSG00000136378	15	78978364	ADAMTS7	T	3.41002e-05	-4.14411	0.0205962	T	-	1
15:78978364:C:T	BIOSQTL	BIOS_eQTL_geneLevel	ENSG00000169684	15	78978364	CHRNA5	T	1.05229e-06	-4.88155	0.000925974	T	-	1
15:78981348:C:T	BIOSQTL	BIOS_eQTL_geneLevel	ENSG00000041357	15	78981348	PSMA4	T	1.71671e-23	9.98828	0	T	+	1
15:78981348:C:T	BIOSQTL	BIOS_eQTL_geneLevel	ENSG00000080644	15	78981348	CHRNA3	T	6.64981e-06	-4.50449	0.00465839	T	-	1
15:78981348:C:T	BIOSQTL	BIOS_eQTL_geneLevel	ENSG00000103811	15	78981348	CTSH	T	3.55072e-12	6.95418	0	T	+	1
15:78981348:C:T	BIOSQTL	BIOS_eQTL_geneLevel	ENSG00000136378	15	78981348	ADAMTS7	T	2.95639e-05	-4.17665	0.018117	T	-	1
15:78981348:C:T	BIOSQTL	BIOS_eQTL_geneLevel	ENSG00000169684	15	78981348	CHRNA5	T	1.05229e-06	-4.88155	0.000925974	T	-	1
15:78983559:C:T	BIOSQTL	BIOS_eQTL_geneLevel	ENSG00000041357	15	78983559	PSMA4	T	1.71671e-23	9.98828	0	T	+	1
15:78983559:C:T	BIOSQTL	BIOS_eQTL_geneLevel	ENSG00000080644	15	78983559	CHRNA3	T	6.64981e-06	-4.50449	0.00465839	T	-	1
15:78983559:C:T	BIOSQTL	BIOS_eQTL_geneLevel	ENSG00000103811	15	78983559	CTSH	T	3.45627e-12	6.95795	0	T	+	1
15:78983559:C:T	BIOSQTL	BIOS_eQTL_geneLevel	ENSG00000136378	15	78983559	ADAMTS7	T	2.60621e-05	-4.20528	0.0161455	T	-	1
15:78983559:C:T	BIOSQTL	BIOS_eQTL_geneLevel	ENSG00000169684	15	78983559	CHRNA5	T	1.0301e-06	-4.88576	0.000895335	T	-	1
15:78984214:A:C	BIOSQTL	BIOS_eQTL_geneLevel	ENSG00000041357	15	78984214	PSMA4	A	1.71671e-23	9.98828	0	A	+	1
15:78984214:A:C	BIOSQTL	BIOS_eQTL_geneLevel	ENSG00000080644	15	78984214	CHRNA3	A	6.64981e-06	-4.50449	0.00465839	A	-	1
15:78984214:A:C	BIOSQTL	BIOS_eQTL_geneLevel	ENSG00000103811	15	78984214	CTSH	A	3.45627e-12	6.95795	0	A	+	1
15:78984214:A:C	BIOSQTL	BIOS_eQTL_geneLevel	ENSG00000136378	15	78984214	ADAMTS7	A	2.56276e-05	-4.2092	0.0159262	A	-	1
15:78984214:A:C	BIOSQTL	BIOS_eQTL_geneLevel	ENSG00000169684	15	78984214	CHRNA5	A	9.57391e-07	-4.90012	0.000844701	A	-	1
15:78992025:C:T	BIOSQTL	BIOS_eQTL_geneLevel	ENSG00000041357	15	78992025	PSMA4	T	2.42064e-24	10.1808	0	T	+	1
15:78992025:C:T	BIOSQTL	BIOS_eQTL_geneLevel	ENSG00000080644	15	78992025	CHRNA3	T	1.24588e-05	-4.36937	0.00839346	T	-	1
15:78992025:C:T	BIOSQTL	BIOS_eQTL_geneLevel	ENSG00000103811	15	78992025	CTSH	T	6.68649e-12	6.86431	0	T	+	1
15:78992025:C:T	BIOSQTL	BIOS_eQTL_geneLevel	ENSG00000136378	15	78992025	ADAMTS7	T	5.95467e-05	-4.01444	0.0341996	T	-	1
15:78992025:C:T	BIOSQTL	BIOS_eQTL_geneLevel	ENSG00000169684	15	78992025	CHRNA5	T	1.44569e-06	-4.81858	0.00118801	T	-	1
15:78994933:C:G	BIOSQTL	BIOS_eQTL_geneLevel	ENSG00000041357	15	78994933	PSMA4	C	1.44621e-24	10.2308	0	C	+	1
15:78994933:C:G	BIOSQTL	BIOS_eQTL_geneLevel	ENSG00000080644	15	78994933	CHRNA3	C	9.09675e-06	-4.43749	0.00626217	C	-	1
15:78994933:C:G	BIOSQTL	BIOS_eQTL_geneLevel	ENSG00000103811	15	78994933	CTSH	C	4.08526e-12	6.93429	0	C	+	1
15:78994933:C:G	BIOSQTL	BIOS_eQTL_geneLevel	ENSG00000136378	15	78994933	ADAMTS7	C	2.01159e-05	-4.26355	0.0129594	C	-	1
15:78994933:C:G	BIOSQTL	BIOS_eQTL_geneLevel	ENSG00000169684	15	78994933	CHRNA5	C	5.53424e-07	-5.00672	0.000452633	C	-	1
15:78997076:A:C	BIOSQTL	BIOS_eQTL_geneLevel	ENSG00000041357	15	78997076	PSMA4	A	1.07817e-24	10.2592	0	A	+	1
15:78997076:A:C	BIOSQTL	BIOS_eQTL_geneLevel	ENSG00000080644	15	78997076	CHRNA3	A	7.85127e-06	-4.46904	0.00540315	A	-	1
15:78997076:A:C	BIOSQTL	BIOS_eQTL_geneLevel	ENSG00000103811	15	78997076	CTSH	A	4.19652e-12	6.93046	0	A	+	1
15:78997076:A:C	BIOSQTL	BIOS_eQTL_geneLevel	ENSG00000136378	15	78997076	ADAMTS7	A	1.44704e-05	-4.33655	0.00959637	A	-	1
15:78997076:A:C	BIOSQTL	BIOS_eQTL_geneLevel	ENSG00000169684	15	78997076	CHRNA5	A	2.9005e-07	-5.12962	0.000211623	A	-	1
15:78999911:A:G	BIOSQTL	BIOS_eQTL_geneLevel	ENSG00000041357	15	78999911	PSMA4	G	4.22761e-24	10.1262	0	G	+	1
15:78999911:A:G	BIOSQTL	BIOS_eQTL_geneLevel	ENSG00000080644	15	78999911	CHRNA3	G	1.80244e-06	-4.77425	0.00142224	G	-	1
15:78999911:A:G	BIOSQTL	BIOS_eQTL_geneLevel	ENSG00000103811	15	78999911	CTSH	G	7.02137e-11	6.52039	0	G	+	1
15:78999911:A:G	BIOSQTL	BIOS_eQTL_geneLevel	ENSG00000136378	15	78999911	ADAMTS7	G	1.69111e-05	-4.30219	0.0110204	G	-	1
15:78999911:A:G	BIOSQTL	BIOS_eQTL_geneLevel	ENSG00000169684	15	78999911	CHRNA5	G	1.47703e-07	-5.25525	8.83441e-05	G	-	1
15:79005504:C:T	BIOSQTL	BIOS_eQTL_geneLevel	ENSG00000041357	15	79005504	PSMA4	T	1.19574e-24	10.2491	0	T	+	1
15:79005504:C:T	BIOSQTL	BIOS_eQTL_geneLevel	ENSG00000080644	15	79005504	CHRNA3	T	1.70336e-05	-4.30049	0.0111074	T	-	1
15:79005504:C:T	BIOSQTL	BIOS_eQTL_geneLevel	ENSG00000103811	15	79005504	CTSH	T	9.1932e-12	6.81861	0	T	+	1
15:79005504:C:T	BIOSQTL	BIOS_eQTL_geneLevel	ENSG00000136378	15	79005504	ADAMTS7	T	1.79318e-05	-4.289	0.0116175	T	-	1
15:79005504:C:T	BIOSQTL	BIOS_eQTL_geneLevel	ENSG00000169684	15	79005504	CHRNA5	T	2.59378e-07	-5.15061	0.000185004	T	-	1
15:79007950:C:T	BIOSQTL	BIOS_eQTL_geneLevel	ENSG00000041357	15	79007950	PSMA4	T	1.19574e-24	10.2491	0	T	+	1
15:79007950:C:T	BIOSQTL	BIOS_eQTL_geneLevel	ENSG00000080644	15	79007950	CHRNA3	T	1.70336e-05	-4.30049	0.0111074	T	-	1
15:79007950:C:T	BIOSQTL	BIOS_eQTL_geneLevel	ENSG00000103811	15	79007950	CTSH	T	9.1932e-12	6.81861	0	T	+	1
15:79007950:C:T	BIOSQTL	BIOS_eQTL_geneLevel	ENSG00000136378	15	79007950	ADAMTS7	T	1.79318e-05	-4.289	0.0116175	T	-	1
15:79007950:C:T	BIOSQTL	BIOS_eQTL_geneLevel	ENSG00000169684	15	79007950	CHRNA5	T	2.59378e-07	-5.15061	0.000185004	T	-	1
15:79012888:C:T	BIOSQTL	BIOS_eQTL_geneLevel	ENSG00000041357	15	79012888	PSMA4	T	1.45219e-24	10.2304	0	NA	NA	1
15:79012888:C:T	BIOSQTL	BIOS_eQTL_geneLevel	ENSG00000080644	15	79012888	CHRNA3	T	1.78352e-05	-4.29028	0.0115576	NA	NA	1
15:79012888:C:T	BIOSQTL	BIOS_eQTL_geneLevel	ENSG00000103811	15	79012888	CTSH	T	8.69507e-12	6.82679	0	NA	NA	1
15:79012888:C:T	BIOSQTL	BIOS_eQTL_geneLevel	ENSG00000136378	15	79012888	ADAMTS7	T	1.87398e-05	-4.27939	0.01216	NA	NA	1
15:79012888:C:T	BIOSQTL	BIOS_eQTL_geneLevel	ENSG00000169684	15	79012888	CHRNA5	T	2.29872e-07	-5.17337	0.000163684	NA	NA	1
15:79017281:C:T	BIOSQTL	BIOS_eQTL_geneLevel	ENSG00000041357	15	79017281	PSMA4	C	1.51968e-24	10.226	0	NA	NA	1
15:79017281:C:T	BIOSQTL	BIOS_eQTL_geneLevel	ENSG00000080644	15	79017281	CHRNA3	C	2.11492e-05	-4.25236	0.0135525	NA	NA	1
15:79017281:C:T	BIOSQTL	BIOS_eQTL_geneLevel	ENSG00000103811	15	79017281	CTSH	C	6.08693e-12	6.87763	0	NA	NA	1
15:79017281:C:T	BIOSQTL	BIOS_eQTL_geneLevel	ENSG00000136378	15	79017281	ADAMTS7	C	2.21734e-05	-4.24171	0.0139985	NA	NA	1
15:79017281:C:T	BIOSQTL	BIOS_eQTL_geneLevel	ENSG00000169684	15	79017281	CHRNA5	C	1.67142e-07	-5.23252	9.89936e-05	NA	NA	1
15:79017685:A:T	BIOSQTL	BIOS_eQTL_geneLevel	ENSG00000041357	15	79017685	PSMA4	T	1.51968e-24	10.226	0	NA	NA	1
15:79017685:A:T	BIOSQTL	BIOS_eQTL_geneLevel	ENSG00000080644	15	79017685	CHRNA3	T	2.11492e-05	-4.25236	0.0135525	NA	NA	1
15:79017685:A:T	BIOSQTL	BIOS_eQTL_geneLevel	ENSG00000103811	15	79017685	CTSH	T	5.9184e-12	6.88172	0	NA	NA	1
15:79017685:A:T	BIOSQTL	BIOS_eQTL_geneLevel	ENSG00000136378	15	79017685	ADAMTS7	T	2.35568e-05	-4.22805	0.0147064	NA	NA	1
15:79017685:A:T	BIOSQTL	BIOS_eQTL_geneLevel	ENSG00000169684	15	79017685	CHRNA5	T	1.63385e-07	-5.23679	9.35505e-05	NA	NA	1
15:79019024:C:T	BIOSQTL	BIOS_eQTL_geneLevel	ENSG00000041357	15	79019024	PSMA4	T	3.33407e-24	10.1494	0	T	+	1
15:79019024:C:T	BIOSQTL	BIOS_eQTL_geneLevel	ENSG00000080644	15	79019024	CHRNA3	T	2.54693e-05	-4.21044	0.0158275	T	-	1
15:79019024:C:T	BIOSQTL	BIOS_eQTL_geneLevel	ENSG00000103811	15	79019024	CTSH	T	1.07117e-11	6.79662	0	T	+	1
15:79019024:C:T	BIOSQTL	BIOS_eQTL_geneLevel	ENSG00000136378	15	79019024	ADAMTS7	T	1.15136e-05	-4.38646	0.00780813	T	-	1
15:79019024:C:T	BIOSQTL	BIOS_eQTL_geneLevel	ENSG00000169684	15	79019024	CHRNA5	T	1.83026e-07	-5.21577	0.0001207	T	-	1
15:79019546:A:C	BIOSQTL	BIOS_eQTL_geneLevel	ENSG00000041357	15	79019546	PSMA4	A	1.59027e-24	10.2216	0	A	+	1
15:79019546:A:C	BIOSQTL	BIOS_eQTL_geneLevel	ENSG00000080644	15	79019546	CHRNA3	A	2.25319e-05	-4.23815	0.0142302	A	-	1
15:79019546:A:C	BIOSQTL	BIOS_eQTL_geneLevel	ENSG00000103811	15	79019546	CTSH	A	5.35625e-12	6.89593	0	A	+	1
15:79019546:A:C	BIOSQTL	BIOS_eQTL_geneLevel	ENSG00000136378	15	79019546	ADAMTS7	A	2.17233e-05	-4.24632	0.0137779	A	-	1
15:79019546:A:C	BIOSQTL	BIOS_eQTL_geneLevel	ENSG00000169684	15	79019546	CHRNA5	A	1.59536e-07	-5.24105	9.36123e-05	A	-	1
15:79020278:C:G	BIOSQTL	BIOS_eQTL_geneLevel	ENSG00000041357	15	79020278	PSMA4	C	1.59027e-24	10.2216	0	C	+	1
15:79020278:C:G	BIOSQTL	BIOS_eQTL_geneLevel	ENSG00000080644	15	79020278	CHRNA3	C	2.25319e-05	-4.23815	0.0142302	C	-	1
15:79020278:C:G	BIOSQTL	BIOS_eQTL_geneLevel	ENSG00000103811	15	79020278	CTSH	C	5.35625e-12	6.89593	0	C	+	1
15:79020278:C:G	BIOSQTL	BIOS_eQTL_geneLevel	ENSG00000136378	15	79020278	ADAMTS7	C	2.17233e-05	-4.24632	0.0137779	C	-	1
15:79020278:C:G	BIOSQTL	BIOS_eQTL_geneLevel	ENSG00000169684	15	79020278	CHRNA5	C	1.59536e-07	-5.24105	9.36123e-05	C	-	1
15:79021037:C:T	BIOSQTL	BIOS_eQTL_geneLevel	ENSG00000041357	15	79021037	PSMA4	C	1.33367e-23	10.0132	0	C	+	1
15:79021037:C:T	BIOSQTL	BIOS_eQTL_geneLevel	ENSG00000080644	15	79021037	CHRNA3	C	4.3249e-05	-4.08936	0.0256494	C	-	1
15:79021037:C:T	BIOSQTL	BIOS_eQTL_geneLevel	ENSG00000103811	15	79021037	CTSH	C	1.41073e-11	6.75684	0	C	+	1
15:79021037:C:T	BIOSQTL	BIOS_eQTL_geneLevel	ENSG00000136378	15	79021037	ADAMTS7	C	1.19883e-05	-4.37768	0.00814508	C	-	1
15:79021037:C:T	BIOSQTL	BIOS_eQTL_geneLevel	ENSG00000169684	15	79021037	CHRNA5	C	3.6608e-07	-5.08566	0.000258593	C	-	1
15:79021441:A:G	BIOSQTL	BIOS_eQTL_geneLevel	ENSG00000041357	15	79021441	PSMA4	G	1.59027e-24	10.2216	0	NA	NA	1
15:79021441:A:G	BIOSQTL	BIOS_eQTL_geneLevel	ENSG00000080644	15	79021441	CHRNA3	G	2.25319e-05	-4.23815	0.0142302	NA	NA	1
15:79021441:A:G	BIOSQTL	BIOS_eQTL_geneLevel	ENSG00000103811	15	79021441	CTSH	G	5.35625e-12	6.89593	0	NA	NA	1
15:79021441:A:G	BIOSQTL	BIOS_eQTL_geneLevel	ENSG00000136378	15	79021441	ADAMTS7	G	2.17233e-05	-4.24632	0.0137779	NA	NA	1
15:79021441:A:G	BIOSQTL	BIOS_eQTL_geneLevel	ENSG00000169684	15	79021441	CHRNA5	G	1.59536e-07	-5.24105	9.36123e-05	NA	NA	1
15:79021445:A:G	BIOSQTL	BIOS_eQTL_geneLevel	ENSG00000041357	15	79021445	PSMA4	A	2.14405e-24	10.1926	0	NA	NA	1
15:79021445:A:G	BIOSQTL	BIOS_eQTL_geneLevel	ENSG00000080644	15	79021445	CHRNA3	A	2.25319e-05	-4.23815	0.0142302	NA	NA	1
15:79021445:A:G	BIOSQTL	BIOS_eQTL_geneLevel	ENSG00000103811	15	79021445	CTSH	A	4.83289e-12	6.91043	0	NA	NA	1
15:79021445:A:G	BIOSQTL	BIOS_eQTL_geneLevel	ENSG00000136378	15	79021445	ADAMTS7	A	1.79479e-05	-4.28897	0.0116453	NA	NA	1
15:79021445:A:G	BIOSQTL	BIOS_eQTL_geneLevel	ENSG00000169684	15	79021445	CHRNA5	A	1.59536e-07	-5.24105	9.36123e-05	NA	NA	1
15:79021464:A:G	BIOSQTL	BIOS_eQTL_geneLevel	ENSG00000041357	15	79021464	PSMA4	A	1.59027e-24	10.2216	0	NA	NA	1
[truncated: 3,307 more rows]
