# Supplementary material for: Human longevity: 25 genetic loci associated in 389,166 UK biobank participants
Source: Aging (Albany NY). 2017 Dec 6;9(12):2504–20. doi: 10.18632/aging.101334 (PMC5764389; doi:10.18632/aging.101334)
Supplement: Supplementary file 7 [file aging-09-2504-s007.xlsx]

## Sheet: eqtl.summary
Gene	CHR	SNP(s) POS (build 37)	Tissues with eQTLs
SARS	1	109814880-109814880	Whole blood (BIOS geneLevel)
KIAA1324	1	109814880-109822166	Whole blood (BIOS geneLevel)
PSRC1	1	109814880-109822166	Whole blood (BIOS geneLevel), Brain Cortex, Esophagus Mucosa, Liver, Pancreas, Skin Not Sun Exposed Suprapubic, Testis, Thyroid, Whole Blood
CELSR2	1	109814880-109822166	Whole blood (BIOS geneLevel), Esophagus Mucosa, Liver, Muscle Skeletal, Skin Sun Exposed Lower leg
SORT1	1	109814880-109822166	Liver, Pancreas
AMIGO1	1	109817838-109821511	Whole blood (BIOS geneLevel)
SLC22A1	6	160505312-160608804	Artery Aorta, Artery Tibial, Lung, Skin Sun Exposed Lower leg, Thyroid
LPA	6	160981736-161081842	Whole blood (BIOS geneLevel)
SLC22A3	6	160985526-161123451	Whole blood (BIOS geneLevel), Skin Sun Exposed Lower leg
LPAL2	6	160985526-161123451	Whole blood (BIOS geneLevel)
CHRNA2	8	27437573-27442064	Whole blood (BIOS geneLevel)
EPHX2	8	27437573-27442064	Whole blood (BIOS geneLevel)
GULOP	8	27437573-27442064	Whole blood (BIOS geneLevel)
CDKN2B	9	22003367-22121349	Whole blood (BIOS geneLevel)
CDKN2B-AS1	9	22011642-22056499	Whole blood (BIOS geneLevel)
CUX2	12	111359712-111412908	Muscle Skeletal
RP1-46F2.2	12	111359712-111426615	Heart Left Ventricle, Muscle Skeletal
FAM109A	12	111708458-112007756	Whole blood (BIOS geneLevel)
SH2B3	12	111708458-112083162	Whole blood (BIOS geneLevel)
ALDH2	12	111833788-112906415	Whole blood (BIOS geneLevel), Artery Tibial, Skin Sun Exposed Lower leg
MAPKAPK5-AS1	12	112059557-112486818	Whole blood (BIOS geneLevel)
MAPKAPK5	12	112059557-112883476	Whole blood (BIOS geneLevel), Testis
ADAM1B	12	112200150-112591686	Whole blood (BIOS geneLevel)
HECTD4	12	112486818-112906415	Whole blood (BIOS geneLevel), Adipose Subcutaneous
LTBP2	14	75182937-75272008	Whole blood (BIOS geneLevel)
FCF1	14	75182937-75374899	Whole blood (BIOS geneLevel)
PGF	14	75182937-75377008	Whole blood (BIOS geneLevel)
RPS6KL1	14	75182937-75377008	Whole blood (BIOS geneLevel), Cells Transformed fibroblasts, Esophagus Mucosa, Nerve Tibial, Skin Not Sun Exposed Suprapubic, Skin Sun Exposed Lower leg
DLST	14	75182937-75377008	Heart Atrial Appendage, Heart Left Ventricle, Muscle Skeletal
EIF2B2	14	75222337-75377008	Whole blood (BIOS geneLevel), Adipose Subcutaneous
MLH3	14	75253847-75377008	Whole blood (BIOS geneLevel)
ACYP1	14	75278181-75377008	Whole blood (BIOS geneLevel)
NEK9	14	75321714-75377008	Whole blood (BIOS geneLevel)
YLPM1	14	75326771-75327443	Adipose Subcutaneous
PSMA4	15	78711803-79074518	Whole blood (BIOS geneLevel), Adipose Subcutaneous, Artery Aorta, Cells Transformed fibroblasts, Heart Left Ventricle, Muscle Skeletal, Whole Blood
CHRNA3	15	78711803-79074518	Whole blood (BIOS geneLevel), Brain Caudate basal ganglia, Muscle Skeletal, Testis
CHRNA5	15	78711803-79074518	Whole blood (BIOS geneLevel), Adipose Subcutaneous, Adipose Visceral Omentum, Artery Coronary, Artery Tibial, Brain Caudate basal ganglia, Brain Cerebellar Hemisphere, Brain Nucleus accumbens basal ganglia, Breast Mammary Tissue, Cells Transformed fibroblasts, Esophagus Mucosa, Esophagus Muscularis, Heart Atrial Appendage, Heart Left Ventricle, Lung, Muscle Skeletal, Nerve Tibial, Skin Sun Expose…
IREB2	15	78719832-78928264	Whole blood (BIOS geneLevel), Skin Not Sun Exposed Suprapubic, Skin Sun Exposed Lower leg, Whole Blood
HYKK	15	78801394-78936168	Whole blood (BIOS geneLevel)
ADAMTS7	15	78828086-79074518	Whole blood (BIOS geneLevel), Artery Tibial
MORF4L1	15	78934318-78936168	Whole blood (BIOS geneLevel)
CHRNB4	15	78944538-79074518	Esophagus Mucosa
CTSH	15	78978364-79074518	Whole blood (BIOS geneLevel)
FES	15	91403674-91437388	Whole blood (BIOS geneLevel), Adipose Subcutaneous, Adipose Visceral Omentum, Artery Aorta, Artery Tibial, Breast Mammary Tissue, Cells Transformed fibroblasts, Lung, Nerve Tibial, Pancreas, Skin Sun Exposed Lower leg, Thyroid, Whole Blood
FURIN	15	91403674-91437388	Whole blood (BIOS geneLevel), Esophagus Mucosa
VPS33B	15	91426560-91426560	Whole blood (BIOS geneLevel)
MAN2A2	15	91427612-91427612	Whole blood (BIOS geneLevel)
PVRL2	19	45361632-45413576	Whole blood (BIOS geneLevel), Artery Tibial, Liver, Pancreas, Whole Blood
TOMM40	19	45382034-45410444	Whole blood (BIOS geneLevel), Esophagus Mucosa
APOE	19	45395266-45425460	Skin Not Sun Exposed Suprapubic, Skin Sun Exposed Lower leg, Testis
APOC1	19	45414451-45425175	Adrenal Gland
PPP1R37	19	45414451-45425460	Whole blood (BIOS geneLevel)
APOC1P1	19	45414451-45425460	Adrenal Gland, Liver
