# Supplementary material for: Human longevity: 25 genetic loci associated in 389,166 UK biobank participants
Source: publisher site journal article supplement (doi:10.18632/aging.101334), 2017-12-06
Supplement: Supplementary file [file aging-v9i12-101334-supplementary-material-SD1.pdf]

## SUPPLEMENTARY MATERIAL

Please browse the Full Text version to see Supplementary Tables related to this manuscript.

**Supplementary Table 1.** GWAS results – parents’ age at death MARTINGALE. Significant SNPs ( $p < 5 \times 10^{-8}$ ) associated with parents’ attained age.

**Supplementary Table 2.** Longevity candidate SNPs PDF. Extracted summary statistics for many candidate loci from previous publications related to lifespan.

**Supplementary Table 3.** CoxPH results of parents’ attained age SNPs. Cox proportional hazards regression model results for the lead SNPs from the parents’

attained age GWAS.

**Supplementary Table 4.** MAGENTA gene-set enrichment analysis. Results from the gene-set enrichment analysis from FUMA (MAGENTA methods).

**Supplementary Table 5.** FUMA eQTL analysis of parents’ attained age-associated variants. SNPs associated with parents’ attained age that are eQTLs - identified by FUMA methods.

**Supplementary Table 6.** eQTLs summarised. Summary of the eQTL association data from FUMA - expression of 53 unique genes affected by SNPs associated with parents’ attained age.

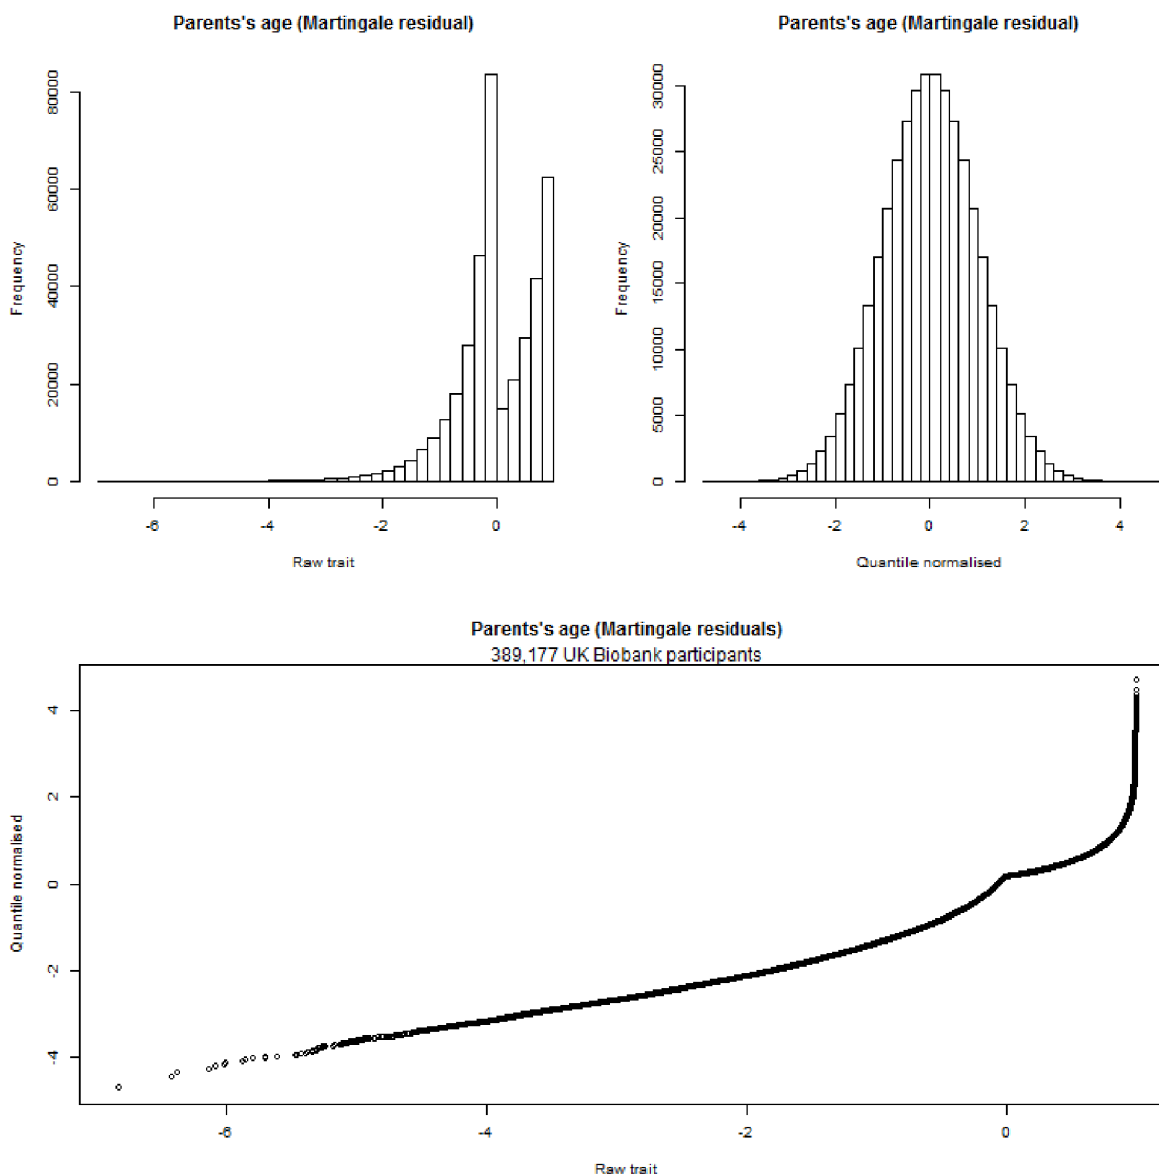

**Supplementary Figure 1. Martingale residuals histograms.** Histograms showing the raw and quantile normalised Martingale residuals.

1. Parents attained age (including both alive and dead)  $n=389,166$   
Lambda GC = 1.199

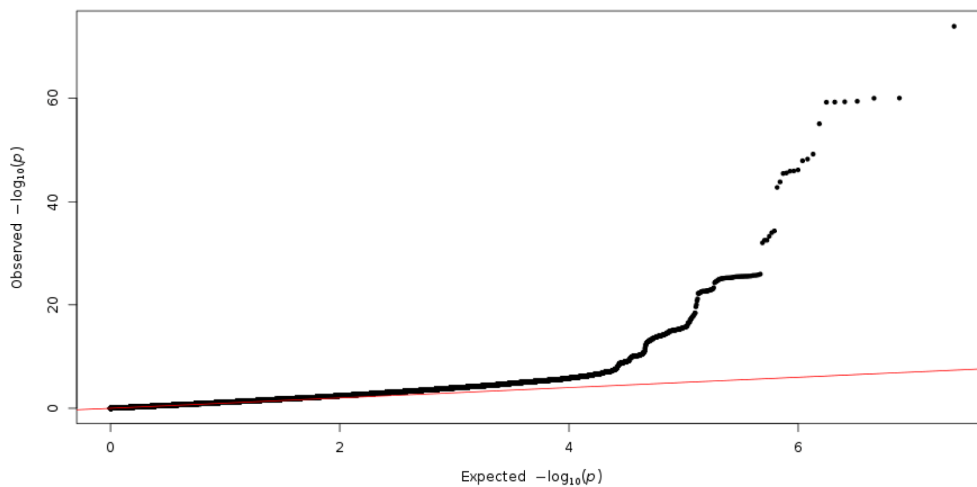

2. Parents age at death (only including parents who died)  $n=208,118$   
Lambda GC = 1.147

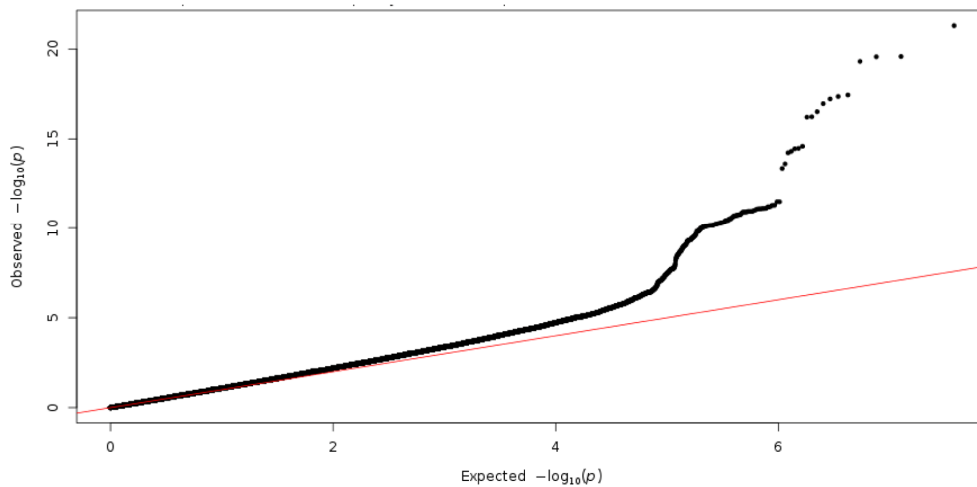

**Supplementary Figure 2. GWAS QQ plots 1-2.** QQ plots for each of the 5 GWAS performed.

3. Both parents reached top 10% of age-specific distributions ( $\geq 90$  for mothers,  $\geq 87$  for fathers)  
 $n = 86,949$   
 Lambda GC = 1.097

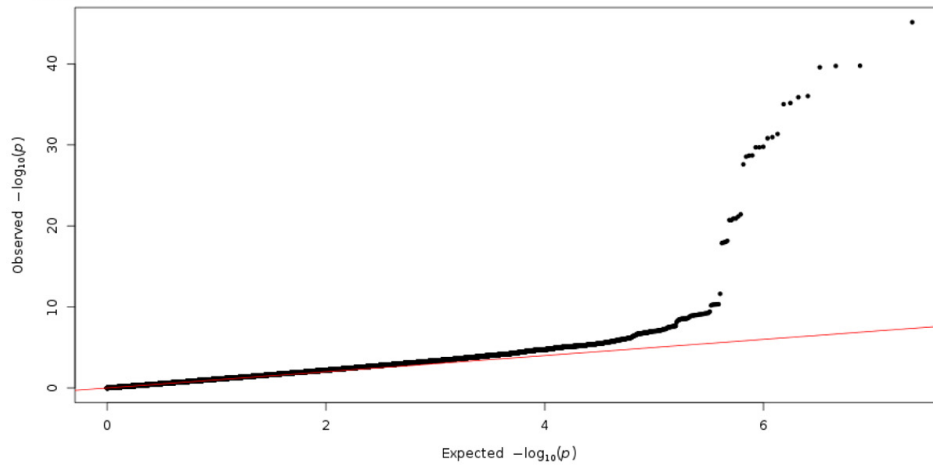

4. Mother's attained age (alive or dead)  $n=412,937$   
 Lambda GC = 1.147

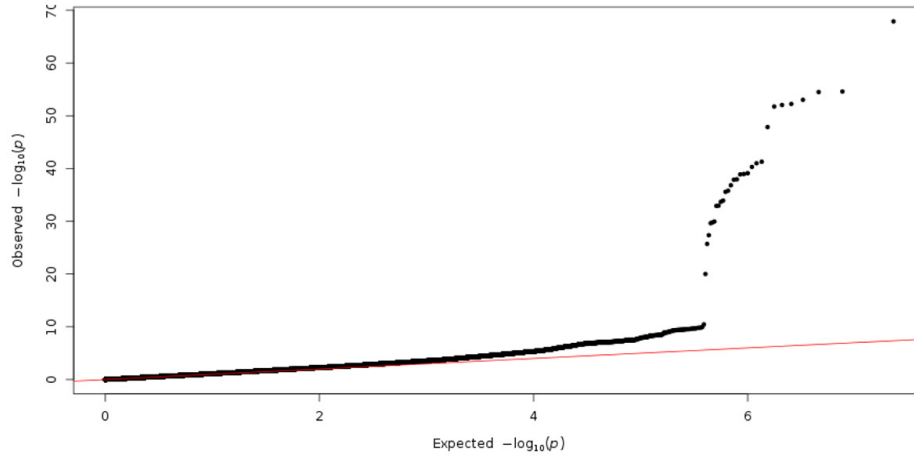

5. Father's attained age (alive or dead)  $n=415,311$   
 Lambda GC = 1.199

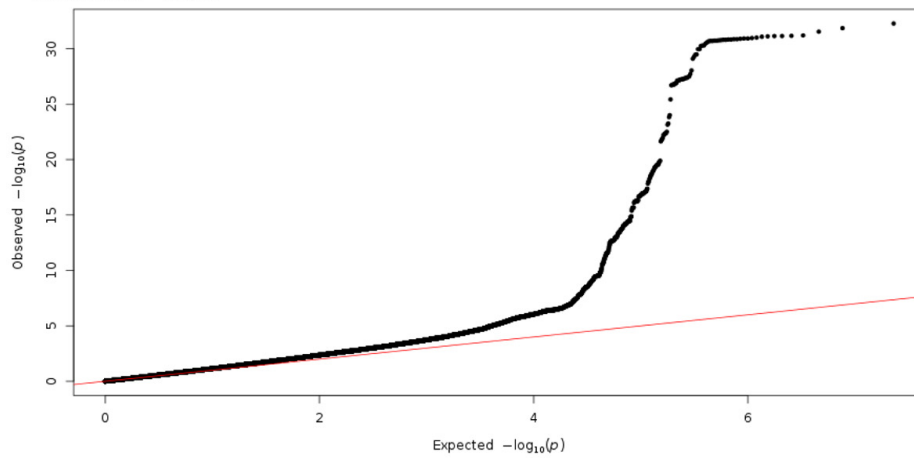

**Supplementary Figure 2. GWAS QQ plots 3-5.** QQ plots for each of the 5 GWAS performed.
